# Supplementary material for: Pan-Cancer Analysis Reveals the Functional Importance of Protein Lysine Modification in Cancer Development
Source: Front Genet. 2018 Jul 17;9:254. doi: 10.3389/fgene.2018.00254 (PMC6056651; doi:10.3389/fgene.2018.00254)
Supplement: Supplementary file 2 [file Table_2.XLSX]

## Sheet: Acetylation
Supplementary Table 2 – Lysine modification sites
Uniprot_id	PTM_site	PTM_domain	Uniprot_id	PTM_site	PTM_domain	Uniprot_id	PTM_site	PTM_domain
O00116	102	GWGYNDSKFIFNKKG	P45880	285	SINAGGHKVGLALEL	Q7L3T8	175	SQKKLSYKQLPFLLY
O00116	107	DSKFIFNKKGQIELT	P45880	31	AARDIFNKGFGFGLV	Q7L3T8	331	QFTNVCGKPTLAEMG
O00116	108	SKFIFNKKGQIELTG	P45880	39	GFGFGLVKLDVKTKS	Q7L4I2	342	RKMLWQGKKEGDKSQ
O00116	116	GQIELTGKRYPLSGM	P45880	45	VKLDVKTKSCSGVEF	Q7L4P6	126	IKRPEGRKPSEVAHK
O00116	143	LGVNVEHKTTSKASL	P45880	64	SSNTDTGKVTGTLET	Q7L4P6	133	KPSEVAHKSIEAVVA
O00116	169	EDFLHDLKETNISYS	P45880	72	VTGTLETKYKWCEYG	Q7L523	307	LERVDGPKHSLLMR*
O00116	220	TCHDDVVKIVNLACK	P45880	74	GTLETKYKWCEYGLT	Q7L576	1053	KMKRLESKYAPLHLV
O00116	292	QELERQLKESGYCTG	P45954	284	GQIGHGYKYAIGSLN	Q7L576	1083	REGDLLTKERLCCGL
O00116	347	TPRGIIEKSCQGPRM	P45954	371	IKEASMAKYYASEIA	Q7L576	1188	YHLLKVQKHDGKDEI
O00116	482	EKVLQHEKQVYDIAA	P45954	70	MIKSSVKKFAQEQIA	Q7L576	1197	DGKDEIIKNVPLKKM
O00116	555	ITRECKEKGVQFAPF	P45973	102	SNSADDIKSKKKREQ	Q7L576	182	KNMKCSVKNDHSAYK
O00116	640	DVGFGMLKSVKEYVD	P45973	143	LMFLMKWKDTDEADL	Q7L590	313	PQSVNSGKTFSIWKL
O00139	102	RRTVASIKNDPPSRD	P45973	154	EADLVLAKEANVKCP	Q7L590	319	GKTFSIWKLNDLRDL
O00139	165	NCVKEVEKLQEKREK	P45973	184	YPEDAENKEKETAKS	Q7L590	554	GSPKPAIKSISASAL
O00139	251	DVITIPSKDVVMVHE	P45973	40	GQVEYLLKWKGFSEE	Q7L590	665	KKLAAITKLRAKGQV
O00139	330	MGGDFSGKNQDCSKG	P45973	42	VEYLLKWKGFSEEHN	Q7L591	477	PQAGFKAKLVTLLSR
O00139	336	GKNQDCSKGIYALAA	P45973	55	HNTWEPEKNLDCPEL	Q7L5D6	36	KLRASVEKGDYYEAH
O00139	391	LRVLEDGKQQVQVVG	P45973	68	ELISEFMKKYKKMKE	Q7L5N1	108	DKEYYYTKEEQFKQV
O00139	489	NKSLLALKECIRALG	P45973	80	MKEGENNKPREKSES	Q7L5N1	274	LPVLSTDKFKTDFYD
O00139	508	HTPFRASKLTQVLRD	P45973	91	KSESNKRKSNFSNSA	Q7L5N1	308	TMNQFVNKFNVLYDR
O00139	680	ILTELRDKVKSFRAA	P45974	184	SKHAFSLKQLDNPAR	Q7L5N7	362	LDWDGVRKHLDEYAS
O00139	696	QEEEQASKQINPKRP	P45974	353	SIPDFQRKYVDKLEK	Q7L5Y9	186	LAWCHDNKSRLRKMK
O00148	130	ELAFQISKEYERFSK	P45974	357	FQRKYVDKLEKIFQN	Q7L5Y9	375	LSIRQDDKVVCPRTK
O00148	137	KEYERFSKYMPSVKV	P45974	360	KYVDKLEKIFQNAPT	Q7L5Y9	38	KRFRAAQKNIDRETS
O00148	155	FGGLSIKKDEEVLKK	P45974	468	FRFLVEEKIKCLATE	Q7L775	111	LCRLLALKGRGWGEG
O00148	161	KKDEEVLKKNCPHVV	P45974	743	FSRDQALKALRATNN	Q7L775	469	MVICRLQKEFERHFK
O00148	187	RNRSFSLKNVKHFVL	P45983	308	MLVIDASKRISVDEA	Q7L7X3	820	NAYQSKIKMQAEAQH
O00148	190	SFSLKNVKHFVLDEC	P45984	250	TPSAEFMKKLQPTVR	Q7L8L6	507	RLAQERTKFDLLKEL
O00148	199	FVLDECDKMLEQLDM	P45985	131	SGQIMAVKRIRSTVD	Q7L9L4	149	KNFMSVAKTILKRLF
O00148	221	FRLTPHEKQCMMFSA	P46013	1004	SEKGKITKMPCQSLQ	Q7LBC6	300	SGCDPASKKLKGDRG
O00148	240	DIRPVCRKFMQDPME	P46013	1022	INTPTHTKQQLKASL	Q7LBC6	325	EASRGPWKGGNASGE
O00148	267	GLQQYYVKLKDSEKN	P46013	1026	THTKQQLKASLGKVG	Q7LBC6	361	IRFATYTKENGRTLV
O00148	32	STPAPPKKDIKGSYV	P46013	1031	QLKASLGKVGVKEEL	Q7LBC6	449	AAGTVPEKQKGSRSQ
O00148	333	LSRYQQFKDFQRRIL	P46013	1035	SLGKVGVKEELLAVG	Q7LBC6	501	GVLATENKPLGFSFG
O00148	35	APPKKDIKGSYVSIH	P46013	1043	EELLAVGKFTRTSGE	Q7LBC6	570	SLSSGLCKGRSVLGT
O00148	383	RAGRFGTKGLAITFV	P46013	1069	GKSIRTFKESPKQIL	Q7LBC6	580	SVLGTDTKPGSKAGS
O00148	52	GFRDFLLKPELLRAI	P46013	1106	LEDLAGFKELFQTPG	Q7LBC6	688	ADSASLAKKKPLFIT
O00148	89	MDVLCQAKSGMGKTA	P46013	1130	KTTKIACKSPPPESV	Q7LBC6	795	KAPFEAVKRFSLDER
O00151	192	PSSLVIDKESEVYKM	P46013	1172	KLTPSAGKAMLTPKP	Q7LBC6	844	IPEHLMGKLGPNGER
O00151	22	GFRLVGGKDFEQPLA	P46013	1208	AGTLPGSKRQLQTPK	Q7LBC6	859	SAELLLGKSKGKQAP
O00151	233	EEKGDPNKPSGFRSV	P46013	1217	QLQTPKEKAQALEDL	Q7LBC6	876	RPRTAPLKVGQSVLK
O00151	241	PSGFRSVKAPVTKVA	P46013	1228	LEDLAGFKELFQTPG	Q7LBR1	16	FNLKFAAKELSRSAK
O00151	246	SVKAPVTKVAASIGN	P46013	1245	EELVAAGKTTKIPCD	Q7LBR1	6	**MSNMEKHLFNLKF
O00151	296	CGTNLKQKGHFFVED	P46013	1248	VAAGKTTKIPCDSPQ	Q7LBR1	87	QTAVTMGKVTKSMAG
O00151	309	EDQIYCEKHARERVT	P46013	1330	TENLTGSKRRPQTPK	Q7LBR1	97	KSMAGVVKSMDATLK
O00151	71	LEAQNRIKGCTDNLT	P46013	1367	EEAVAAGKTTKMPCE	Q7LFL8	37	PKAGAADKSAVVAAA
O00151	98	PLVTEEGKRHPYKMN	P46013	1370	VAAGKTTKMPCESSP	Q7RTP6	1381	DEGLHLLKPLSIPKR
O00154	153	NILTGAKKLTNKATL	P46013	1408	QKELSALKKLTQTSG	Q7RTP6	1841	KAARRQAKQEELKRL
O00154	157	GAKKLTNKATLWYVP	P46013	1422	GETTHTDKVPGGEDK	Q7RTP6	1846	QAKQEELKRLHRAQI
O00154	168	WYVPLSLKNVDKVLE	P46013	1441	FRETAKQKLDPAASV	Q7RTP6	680	KDLDGAGKRRKTSQS
O00154	172	LSLKNVDKVLEVPPV	P46013	1452	AASVTGSKRHPKTKE	Q7RTR0	303	LGFSESEKKSYFSYF
O00154	198	RKRYEAQKLERMETK	P46013	1458	SKRHPKTKEKAQPLE	Q7RTR0	304	GFSESEKKSYFSYFF
O00154	283	DAINFHDKIRKGCVI	P46013	1460	RHPKTKEKAQPLEDL	Q7RTS3	201	PYEKRLSKVDTLRLA
O00154	286	NFHDKIRKGCVITIS	P46013	1471	LEDLAGLKELFQTPV	Q7RTV0	25	AIGRLCEKCDGKCVI
O00154	355	VPETEDEKKRFEEGK	P46013	1482	QTPVCTDKPTTHEKT	Q7RTV0	29	LCEKCDGKCVICDSY
O00154	369	KGRYLQMKAKRQGHA	P46013	1508	VDTPTSSKPQSKRSL	Q7RTV0	3	*****MAKHHPDLIF
O00154	78	VHGGTILKMIEEAGA	P46013	1536	KRTPSAGKAMHTPKP	Q7RTV0	73	VSDAYYCKECTIQEK
O00159	224	ILSYLLEKSRVVHQN	P46013	1542	GKAMHTPKPAVSGEK	Q7RTV0	80	KECTIQEKDRDGCPK
O00159	269	QSYLYLVKGQCAKVS	P46013	1549	KPAVSGEKNIYAFMG	Q7RTV0	87	KDRDGCPKIVNLGSS
O00159	281	KVSSINDKSDWKVVR	P46013	1572	TENLTGSKRRLQTPK	Q7RTV0	95	IVNLGSSKTDLFYER
O00159	285	INDKSDWKVVRKALT	P46013	1581	RLQTPKEKAQALEDL	Q7Z2E3	166	GQCSVPLKKGKDAPI
O00159	396	TFTWLVGKINRSLAS	P46013	160	GNPQVHIKNVKEDST	Q7Z2E3	198	DPKMQVYKDEQVVVI
O00159	486	ICDLVEEKFKGIISI	P46013	1609	EESMTNDKTAKVACK	Q7Z2E3	208	QVVVIKDKYPKARYH
O00159	571	DLLFRNLKETMCSSK	P46013	1616	KTAKVACKSSQPDPD	Q7Z2E3	257	VDFAGSSKLRFRLGY
O00159	647	VLIRHQVKYLGLLEN	P46013	1624	SSQPDPDKNPASSKR	Q7Z2K6	758	PVHFLIRKNWYLPAP
O00159	667	AGFAYRRKYEAFLQR	P46013	1639	RLKTSLGKVGVKEEL	Q7Z2T5	223	YIAASTAKPPKEILK
O00159	676	EAFLQRYKSLCPETW	P46013	1643	SLGKVGVKEELLAVG	Q7Z2T5	324	QENCHLNKLKVVVDS
O00159	704	LVRHLGYKPEEYKMG	P46013	1651	EELLAVGKLTQTSGE	Q7Z2T5	609	DNYIAQGKRKSNEMI
O00159	858	CIKNMVWKYCRSISP	P46013	1671	TEPTGDGKSMKAFME	Q7Z2T5	621	EMITNLGKKQKTDVS
O00160	611	QVEYLGLKENIRVRR	P46013	1694	AASLTGSKRQLRTPK	Q7Z2T5	653	MNMPKLKKFLCYLSQ
O00161	97	TKNFESGKAYKTTWG	P46013	1703	QLRTPKGKSEVPEDL	Q7Z2W4	107	QSERNLCKYSHEVLS
O00170	103	VLYPLVAKSLRNIAV	P46013	172	DSTADDSKDSVAQGT	Q7Z2W4	119	VLSEENFKVLKNHEL
O00170	201	HVKEAAAKYYDAIAC	P46013	1752	VDTPTSSKPQPKRSL	Q7Z2W4	222	IQDICNSKHMQKNPP
O00170	210	YDAIACLKNLQMKEQ	P46013	1860	TTKKILCKSPQSDPA	Q7Z2W4	296	PVDDLTRKFTYLGSQ
O00170	66	PMELIIGKKFKLPVW	P46013	1902	KLTPSAGKAMHTPKA	Q7Z2W4	597	STPSSVTKPANSVFT
O00178	330	KLLQRLLKSPGCRKI	P46013	1915	KAAVGEEKDINTFVG	Q7Z2W4	695	QWYVQQMKRGPDHQP
O00178	466	QTASFALKKIKRSSI	P46013	1938	LGNLPGSKRRPQTPK	Q7Z2W4	729	FLSSKKYKLSEIHHL
O00186	128	KIKASCSKSIRRCKE	P46013	1958	LEDLAGFKELFQTPG	Q7Z2W4	813	LHETHENKYGKGIYF
O00186	357	LAEDCMNKFKLNIEK	P46013	1975	EESMTDDKITEVSCK	Q7Z2W4	829	KDAIYSHKNCPYDAK
O00186	570	STHVLTPKKLLDDIK	P46013	2005	RLKISLGKVGVKEEV	Q7Z2W4	89	CDNLHLCKLNLLGRC
O00186	577	KKLLDDIKMLNKPKD	P46013	2009	SLGKVGVKEEVLPVG	Q7Z2Z1	1149	PAKMTPTKQAAFKES
O00186	581	DDIKMLNKPKDKVSL	P46013	2017	EEVLPVGKLTQTSGK	Q7Z2Z1	580	NTMCRSLKMLNVARL
O00186	583	IKMLNKPKDKVSLIK	P46013	2047	KAFKESAKQMLDPAN	Q7Z2Z1	590	NVARLNVKAQKLHPD
O00193	174	KDAKSNYKMMFVKSS	P46013	2080	LEDLAGFKELFQTPD	Q7Z2Z1	926	QELLSPSKRSLKRGL
O00193	179	NYKMMFVKSSGS***	P46013	2097	EESTTDDKTTKIACK	Q7Z2Z2	255	FARIYSQKIGIKKEV
O00193	49	LRLMGAGKKEHTGRL	P46013	2104	KTTKIACKSPPPESM	Q7Z2Z2	452	ARQRHAEKLAAAQGQ
O00193	74	FRTGEEDKKINEELE	P46013	2167	FRETAKQKLDPAASV	Q7Z2Z2	528	KIFVLGPKYSPLEFL
O00193	75	RTGEEDKKINEELES	P46013	2178	AASVTGSKRQPRTPK	Q7Z2Z2	806	KIWEFKGKLEQHLTG
O00193	91	YQQSMDSKLSGRYRR	P46013	2198	LEDLAGLKELFQTPI	Q7Z333	1167	PKRKRSEKPMAEDPV
O00203	414	REFQTYVKSQDKQFA	P46013	2209	QTPICTDKPTTHEKT	Q7Z333	1225	VSQKKSSKLCTCTEP
O00203	552	LTNSKQTKLLTQYIL	P46013	2236	VGTPTIFKPQSKRSL	Q7Z333	1581	ADEDVFRKPGLPPPA
O00203	592	VKSGALSKYAKKIFL	P46013	2240	TIFKPQSKRSLRKAD	Q7Z333	1590	GLPPPASKPLRPTTK
O00221	494	DDLKISGKLLLCTD*	P46013	2264	KRTPSVGKAMDTPKP	Q7Z333	1647	PVPLIAQKPVGEMKN
O00222	872	MQSKLIQKGNDRPNG	P46013	2300	PGNLPGSKRWPQTPK	Q7Z333	629	EESEQMGKTSRKDMH
O00231	141	VSLYFDTKRYQEALH	P46013	2309	WPQTPKEKAQALEDL	Q7Z333	694	SCLKQSSKNIFTERA
O00231	274	VQALVSGKLALRYAG	P46013	231	TQCLDNSKKNESPFW	Q7Z392	245	QDTQNALKNYRTAYN
O00231	288	GRQTEALKCVAQASK	P46013	2320	LEDLAGFKELFQTPG	Q7Z392	656	LENLTQGKMCLVPGK
O00231	295	KCVAQASKNRSLADF	P46013	2330	FQTPGTDKPTTDEKT	Q7Z3B0	60	KEQKKKQKRQENIAK
O00231	304	RSLADFEKALTDYRA	P46013	2343	KTTKIACKSPQPDPV	Q7Z3B0	69	QENIAKAKRLKKD**
O00231	32	DILHSIVKRDIQEND	P46013	2357	VDTPASTKQRPKRNL	Q7Z3B3	104	KLQGVFSKQTVLKSH
O00231	355	EHISSLIKLSKADVE	P46013	2385	KRTPSAGKAMDTPKP	Q7Z3B3	159	APVNGLAKKLTKSST
O00231	372	LSQMILDKKFHGILD	P46013	2398	KPAVSDEKNINTFVE	Q7Z3B3	180	STSLNGGKRALTSSA
O00231	417	VVDSLYNKAKKLT**	P46013	2421	LGNLPGSKRQPQTPK	Q7Z3B3	262	SSNLGGVKLEGKKSP
O00231	82	PFLNSISKAKAARLV	P46013	2458	EESMTDDKITEVSCK	Q7Z3B3	331	FLEKTLSKLPNLESL
O00232	197	MRLCLAVKDYIRTQI	P46013	2500	EEPLAVSKLTRTSGE	Q7Z3B3	50	LIAANGTKRKAIAAE
O00232	212	ISKKINTKFFQEENT	P46013	2520	TEPTGDSKSIKAFKE	Q7Z3B3	600	TRPVLSCKKRRLVRP
O00232	221	FQEENTEKLKLKYYN	P46013	2530	KAFKESPKQILDPAA	Q7Z3B3	601	RPVLSCKKRRLVRPN
O00232	262	CIQAESEKWQQALKS	P46013	2587	KNTKIPCKSPPPELT	Q7Z3B3	615	NSIVPLSKKVHRNST
O00232	33	QRLPECAKLAKEGRL	P46013	2601	TDTATSTKRCPKTRP	Q7Z3B3	692	LKSQWQNKPFDKIKP
O00232	368	HNIRIMAKYYTRITM	P46013	2613	TRPRKEVKEELSAVE	Q7Z3B3	735	SSFLTTAKLSHHQTR
O00232	419	IINFQRPKDPNNLLN	P46013	2703	LTAGKATKIPCESPP	Q7Z3B3	767	VERVTAPKAERLLNP
O00232	441	SLMSLVNKTTHLIAK	P46013	2721	VDTTASTKRHLRTRV	Q7Z3B3	785	VHDPNHSKMRLRDHS
O00232	448	KTTHLIAKEEMIHNL	P46013	2730	HLRTRVQKVQVKEEP	Q7Z3B3	93	DVTSVPSKESLKLQG
O00232	98	SKRRSQLKQAVAKMV	P46013	2734	RVQKVQVKEEPSAVK	Q7Z3B4	185	YSCMPSNKDEDGLVV
O00233	211	VPTRWAGKGLLGCNI	P46013	2741	KEEPSAVKFTQTSGE	Q7Z3B4	197	LVVLVFNKKETEIRS
O00233	87	ICLQNDHKAVMKQVE	P46013	2754	GETTDADKEPAGEDK	Q7Z3B4	321	VDNPDSEKLIPVPMV
O00244	25	AVSRVLNKLGGVKYD	P46013	2761	KEPAGEDKGIKALKE	Q7Z3B4	428	LNAPTQFKGRLNELM
O00244	30	LNKLGGVKYDIDLPN	P46013	2826	KTTKIPCKSSPELED	Q7Z3D6	203	DPELLGIKELSKPAY
O00244	38	YDIDLPNKKVCIESE	P46013	2839	EDTATSSKRRPRTRA	Q7Z3E1	32	CQMRLSEKITPLKTC
O00244	56	DTLLATLKKTGKTVS	P46013	2860	EELLAVGKLTQTSGE	Q7Z3E2	488	IKELEDLKRTFKEGM
O00244	57	TLLATLKKTGKTVSY	P46013	2873	GETTHTDKEPVGEGK	Q7Z3K3	1021	QGENLEGKYLSFEAE
O00244	60	ATLKKTGKTVSYLGL	P46013	2880	KEPVGEGKGTKAFKQ	Q7Z3K3	1053	NEETLFQKATKIGRS
O00255	502	EEPPPPKKPALDKGL	P46013	2886	GKGTKAFKQPAKRKL	Q7Z3K3	1273	VCIKRTVKNFLHKKW
O00257	106	SSTDNRAKLDLGAQG	P46013	3029	VEELPASKKQRVAPR	Q7Z3K3	683	PKQLEGLKPGTKVTI
O00257	125	HQYELNSKKHHQYQP	P46013	3074	SNDMKTNKEEHKLQD	Q7Z3K3	798	INNHVPRKSPKYLAL
O00257	149	PPPGKSGKYYYQLNS	P46013	3087	QDSVPENKGISLRSR	Q7Z3K3	801	HVPRKSPKYLALFKN
O00257	157	YYYQLNSKKHHPYQP	P46013	3180	SGGQKSAKVLMQNQK	Q7Z3K3	807	PKYLALFKNSVSGIK
O00257	197	AKSHPPDKWAQGAGA	P46013	3217	AASTLESKSVQRVTR	Q7Z3K3	832	SVGDAMAKHLVFNPS
O00257	212	KGYLGAVKPLAGAAG	P46013	3243	AEDNVCVKKIRTRSH	Q7Z3K3	871	RVHDRNVKNMYPPPS
O00257	249	TGNGIGGKMKIVKNK	P46013	344	FPLYEPAKMKTPVQY	Q7Z3K3	883	PPSFPTNKAATVKSA
O00264	105	FDVTKGRKFYGPEGP	P46013	388	EGFKAGDKTLTPRKL	Q7Z3K3	976	KKEQLSVKKLRVVLF
O00264	163	WESQFTFKYHHVGKL	P46013	404	TRNRTPAKVEDAADS	Q7Z3K6	233	SLRTGSEKIMDRISA
O00264	169	FKYHHVGKLLKEGEE	P46013	414	DAADSATKPENLSSK	Q7Z3T8	205	NREIGGIKELGIKVD
O00267	1017	GMCSVYLKDSEKVVS	P46013	421	KPENLSSKTRGSIPT	Q7Z3T8	228	YSGTENLKDKKIFNQ
O00267	1021	VYLKDSEKVVSISSE	P46013	46	IQLPVVSKQHCKIEI	Q7Z3U7	1423	VVVDLYQKTACHKAV
O00267	1037	LEPITPTKNNKVKVI	P46013	463	IQKDSLSKPEKLGTT	Q7Z406	1105	LRAQLGRKEEELQAA
O00267	175	QQLLPGVKDPNLWTV	P46013	548	MHTPPVLKKIIKEQP	Q7Z406	1197	EQEVTELKKTLEEET
O00267	328	SLKDWFAKRKKFKRP	P46013	552	PVLKKIIKEQPQPSG	Q7Z406	1469	TLEKKQRKFDQLLAE
O00267	344	QRLFDAEKIRSLGGD	P46013	600	DQRRRSCKTAPASSS	Q7Z406	1613	ERRRQLAKQLRDAEV
O00267	479	FKMGDHVKVIAGRFE	P46013	627	KSGNLPSKRVSISRS	Q7Z406	990	RQKLQLEKVTTEAKM
O00267	601	IHVKDIVKVIDGPHS	P46013	645	ILQMICSKRRSGASE	Q7Z417	109	GEREISLKNLSSDEA
O00267	627	SFAFLHCKKLVENGG	P46013	764	EMFKTPVKEQPQLTS	Q7Z417	140	TSLKQTVKANTFGKA
O00267	639	NGGMFVCKTRHLVLA	P46013	843	RENGNVAKTPRNTYK	Q7Z417	146	VKANTFGKAGIKTKN
O00267	718	RISQGPYKGYIGVVK	P46013	850	KTPRNTYKMTSLETK	Q7Z417	152	GKAGIKTKNFIQKNS
O00268	795	LQPVPVVKPAVLPGT	P46013	906	EIVECILKRGQKATL	Q7Z417	243	NLNIVQDKIMQQETS
O00268	817	AQAAAAQKNKLKEPG	P46013	957	RSRTWGQKCAPMSDL	Q7Z417	262	KQGLETFKPDYSEQK
O00268	929	QQKNFSYKDDDRYEQ	P46013	993	LQTQDHAKAPKSEKG	Q7Z417	277	GNRVDGSKPIWKYET
O00273	19	SGEIRTLKPCLLRRN	P46019	762	HGDVDCEKLVEQLKD	Q7Z417	322	FDDRPKGKHASAVAS
O00273	313	LRSISASKASPPGDL	P46059	474	PNHYQVVKDGLNQKP	Q7Z417	330	HASAVASKEDSWTLF
O00294	200	KMRKTKKKGSGEADK	P46060	148	CFTLQELKLNNCGMG	Q7Z417	338	EDSWTLFKPPPVFPV
O00294	260	EEAATVIKKSNQKGK	P46060	160	GMGIGGGKILAAALT	Q7Z417	667	AAIVYHTKEMESIWN
O00294	273	GKAKGKGKKKAKEER	P46060	178	RKSSAQGKPLALKVF	Q7Z434	10	FAEDKTYKYICRNFS
O00299	119	AKFSAYIKNSNPALN	P46060	251	NDNTFTEKGAVAMAE	Q7Z434	362	RAGMVPSKVPTSMVL
O00299	13	PQVELFVKAGSDGAK	P46060	26	AGGQLSFKGKSLKLN	Q7Z449	487	FIPFGIGKRVCMGEQ
O00299	131	ALNDNLEKGLLKALK	P46060	296	RGGLPKLKELNLSFC	Q7Z460	570	LNRPLSAKRSPTGST
O00299	135	NLEKGLLKALKVLDN	P46060	306	NLSFCEIKRDAALAV	Q7Z460	691	SRSSSPGKLLGSGYG
O00299	138	KGLLKALKVLDNYLT	P46060	31	SFKGKSLKLNTAEDA	Q7Z478	1065	ACELNEPKLTPLGQH
O00299	166	DEGVSQRKFLDGNEL	P46060	320	VAEAMADKAELEKLD	Q7Z478	1178	LLTLEDVKQELIKLV
O00299	183	ADCNLLPKLHIVQVV	P46060	413	KSATPSRKILDPNTG	Q7Z478	1235	VGKIIYTKSVDVTEK
O00299	192	HIVQVVCKKYRGFTI	P46060	481	LKVSSVFKDEATVRM	Q7Z478	1242	KSVDVTEKLACIVET
O00299	20	KAGSDGAKIGNCPFS	P46060	524	LVHMGLLKSEDKVKA	Q7Z478	270	RYLHLAAKLLDAKEQ
O00299	49	NVTTVDTKRRTETVQ	P46060	528	GLLKSEDKVKAIANL	Q7Z478	282	KEQAATFKLEKNKQG
O00299	95	LCPPRYPKLAALNPE	P46060	71	EAARVIAKALEKKSE	Q7Z478	380	SWTGKSPKQFLIDWV
O00303	161	KNMYELHKKVSPNEL	P46060	8	MASEDIAKLAETLAK	Q7Z478	494	PRDLFIAKLLNKLKQ
O00303	214	QNGRMSIKAYVSTLM	P46063	171	SSSKEHVKWVHAEMV	Q7Z478	576	RQQLPVFKHRDSIVE
O00303	238	MFTPLTVKYAYYDTE	P46063	180	VHAEMVNKNSELKLI	Q7Z478	65	PRVKQGPKIYSFNST
O00303	254	IGVDLIMKTCFSPNR	P46063	185	VNKNSELKLIYVTPE	Q7Z478	828	DLNPFYQKYSSRTQH
O00305	276	SVLNNPSKRAIIERS	P46063	193	LIYVTPEKIAKSKMF	Q7Z478	83	SGPANLDKSILKVVI
O00311	445	QAAKTFGKSILCSKE	P46063	206	MFMSRLEKAYEARRF	Q7Z478	93	LKVVINNKLEQRIIG
O00311	451	GKSILCSKEVPAQDL	P46063	236	HDFRPDYKALGILKR	Q7Z4G1	39	SDTCRSLKYPYVAVM
O00327	263	PSVKVEDKDFPSTCS	P46063	242	YKALGILKRQFPNAS	Q7Z4G1	48	PYVAVMLKVADHSGQ
O00327	494	GTRAGAGKIGRMIAE	P46063	313	KLINGRYKGQSGIIY	Q7Z4G1	57	ADHSGQVKTKCFEMT
O00327	538	DASSPGGKKILNGGT	P46063	452	SYCQNISKCRRVLMA	Q7Z4G4	452	KYFSGVTKRIAKEEK
O00329	1018	ALKHFRVKFNEALRE	P46063	473	WNSEACNKMCDNCCK	Q7Z4H7	339	VDLHYLEKETKFQKE
O00329	449	WPSVPDEKGELLNPT	P46063	480	KMCDNCCKDSAFERK	Q7Z4H7	352	KERLSDLKHMRYRIK
O00330	120	IVVEEGSKNIRLGSL	P46063	498	EYCRDLIKILKQAEE	Q7Z4Q2	148	NEMSLQEKKDQNRNS
O00330	139	VEEGEDWKHVEIPKD	P46063	501	RDLIKILKQAEELNE	Q7Z4Q2	545	DQLMTLCKAGIHSSN
O00330	194	AARNILEKHSLDASQ	P46063	509	QAEELNEKLTPLKLI	Q7Z4S6	1063	AQKEAQIKVLEGRLK
O00330	218	FTKEDALKLVQLKQT	P46063	514	NEKLTPLKLIDSWMG	Q7Z4S6	1148	MKLCGEVKPKNKARR
O00330	223	ALKLVQLKQTGKITE	P46063	522	LIDSWMGKGAAKLRV	Q7Z4V5	163	KRKTPALKMSVSKRA
O00330	321	KVRQDLVKDDIKVSV	P46063	592	AITMQVTKSTQNSFR	Q7Z4V5	282	RGRKPAEKPLPKPRG
O00330	325	DLVKDDIKVSVNDFI	P46063	613	CHSEQGDKKMEEKNS	Q7Z4V5	39	AVKPPPNKYPIFFFG
O00330	394	QEIADSVKALSKKAR	P46063	625	KNSGNFQKKAANMLQ	Q7Z4V5	443	PEEKQQAKPVKVERT
O00330	488	ELATRFLKSFKANLE	P46063	637	MLQQSGSKNTGAKKR	Q7Z4V5	446	KQQAKPVKVERTRKR
O00330	491	TRFLKSFKANLENPI	P46063	88	DILQNVFKLEKFRPL	Q7Z4V5	477	SVEEKLQKLHSEIKF
O00330	58	WLRGDPIKILMPSLS	P46063	91	QNVFKLEKFRPLQLE	Q7Z4V5	494	KVDSPDVKRCLNALE
O00330	75	MEEGNIVKWLKKEGE	P46087	340	VNLDPLGKWSKTGLV	Q7Z4V5	524	TDVVATLKKIRRYKA
O00370	527	PGRDTTKKENFRPIS	P46087	407	SYMAQLMKNTGVILA	Q7Z4V5	560	PKIEAVQKVNKAGME
O00370	541	SLMNIDAKILNKILA	P46087	41	AVSDENSKRLSSRAR	Q7Z4V5	610	NGEATSQKGESAEDK
O00410	1052	GEMHEAIKHEDPCAK	P46087	423	DANAERLKSVVGNLH	Q7Z4V5	63	KDLFPYDKCKDKYGK
O00410	436	DFAPGFQKKFHEKVI	P46087	471	SGTGVISKDPAVKTN	Q7Z4V5	65	LFPYDKCKDKYGKPN
O00410	548	IVENAVQKELRLLRG	P46087	479	DPAVKTNKDEKDILR	Q7Z4W1	17	VLVTGAGKGIGRGTV
O00410	613	SAWARMCKILGKEFQ	P46087	482	VKTNKDEKDILRCAH	Q7Z4W1	171	ALELGPHKIRVNAVN
O00410	690	QMLVCYAKELKEGFV	P46087	492	LRCAHLQKELLLSAI	Q7Z589	1246	RIQNVGQKKAEESPA
O00410	693	VCYAKELKEGFVEYT	P46087	649	PKKASFQKLNGISKG	Q7Z589	200	SCSDEDEKPRKRRRT
O00410	806	AKLEEHFKNQELRQV	P46087	655	QKLNGISKGADSELS	Q7Z589	620	QTVPTGAKPAILTAT
O00410	961	VIQSADSKTKENVNA	P46087	669	STVPSVTKTQASSSF	Q7Z589	655	AAKIIPTKIVYGQQG
O00410	978	NCISAVGKIMKFKPD	P46087	685	DSSQPAGKAEGIREP	Q7Z589	671	TQVLIKPKPVTFQAT
O00411	1197	RFCSEPQKILEASQL	P46087	704	KLKQRSPKLQSSKKV	Q7Z589	975	TLQCFQTKQKQTIHL
O00411	1205	ILEASQLKETLQAVP	P46087	709	SPKLQSSKKVAFLRQ	Q7Z591	769	MERYLSVKSLPEAMR
O00411	394	PKLHLPLKTLQCLFE	P46087	71	TNKSPEAKPLPGKLP	Q7Z5B4	202	TRVMKEGKFIDRFSP
O00411	402	TLQCLFEKQLHMELA	P46087	710	PKLQSSKKVAFLRQN	Q7Z5J4	1083	TTPAPPDKLGGKQRA
O00411	419	VCVVSVEKPTLPSKE	P46087	741	SKTQATLKPKDHHQP	Q7Z5J4	1087	PPDKLGGKQRAAFKS
O00411	425	EKPTLPSKEVKHARK	P46087	753	HQPLGRAKGVEKQQL	Q7Z5J4	1093	GKQRAAFKSGKRVGK
O00411	443	TLRDQWEKALCRALR	P46087	757	GRAKGVEKQQLPEQP	Q7Z5J4	1096	RAAFKSGKRVGKPSP
O00411	595	QMPCSLDKPHRSSRL	P46087	76	EAKPLPGKLPKGISA	Q7Z5J4	1139	DSPSTPGKDQRSMIL
O00411	622	VQQIGILKPHPAYVQ	P46087	767	LPEQPFEKAAFQKQN	Q7Z5J4	1235	FMAPVPTKKRNLVLR
O00418	347	TKLLQSAKTILRGTE	P46087	772	FEKAAFQKQNDTPKG	Q7Z5J4	1259	SGNGGDGKEERPEGS
O00422	114	GSTMSGRKGTDDSMT	P46087	91	GAVQTAGKKGPQSLF	Q7Z5J4	13	ERCGFHGKQQNYQQT
O00422	13	RVTQEEIKKEPEKPI	P46087	92	AVQTAGKKGPQSLFN	Q7Z5J4	1364	LSPSLSDKDRGLKGA
O00422	18	EIKKEPEKPIDREKT	P46100	1099	KRCKLLGKSSRKRQD	Q7Z5J4	1411	TNRSLKGKLMNSKKL
O00422	24	EKPIDREKTCPLLLR	P46100	1498	TETQNALKEEEERRK	Q7Z5J4	1584	LKYISSCKRLRSDSR
O00422	74	KELTSLVKEVYPEAR	P46100	1530	IEDASPTKCPITTKL	Q7Z5J4	1753	AAAATAGKPPRPDGP
O00425	190	GSPGSVSKQKPCDLP	P46100	241	FCHNAFCKKCILRNL	Q7Z5J4	638	SLVKDSSKPPFSLEN
O00425	280	FTEEIPLKILAHNNF	P46100	2490	NPGPSQGKSM*****	Q7Z5J4	675	PDSLQLDKGGNAKDF
O00425	429	GKQGQHIKQLSRFAG	P46100	375	SSYVKFLKQATDNSE	Q7Z5J4	767	LHPGELTKGLEQGGK
O00425	475	GRIYGKIKEENFVSP	P46100	568	VKLNISSKDNRGGIK	Q7Z5J4	77	AAAVAADKYHRGSKA
O00425	508	RVIGKGGKTVNELQN	P46100	623	KSCGLNPKLEKCGLG	Q7Z5J4	774	KGLEQGGKASDGISK
O00425	66	GKIELHGKPIEVEHS	P46100	805	AKSSIISKKKRQTQS	Q7Z5J4	781	KASDGISKGDTHEAS
O00429	271	DEYAFLQKKYPSLAN	P46100	806	KSSIISKKKRQTQSE	Q7Z5J4	901	KAPLICTKEEVEEVL
O00429	283	LANRNGTKYLARTLN	P46100	858	EDEKHSKKGMDNQGH	Q7Z5J4	950	ESSLSHMKPGEEGPD
O00429	92	VEAEEWGKFLHTKNK	P46100	967	GLSDIAEKFLKKDQS	Q7Z5J4	975	SDASLAQKPNKPAVP
O00442	156	FIFNCDIKTRGYYPK	P46108	253	RVPNAYDKTALALEV	Q7Z5J4	978	SLAQKPNKPAVPEAP
O00442	163	KTRGYYPKGGGEVIV	P46108	282	WEGECNGKRGHFPFT	Q7Z5K2	1059	SKTDELIKDAPTTQH
O00442	191	TERGCVTKIYGRAFV	P46109	145	DAEDLPFKKGEILVI	Q7Z5K2	132	EDTVVSDKCFPLEDT
O00442	205	VAGVLPFKVAKDMAA	P46109	253	RVPCAYDKTALALEV	Q7Z5K2	143	LEDTLLGKEKSTNRI
O00443	11	ISSNSGFKECPSSHP	P46199	715	RIVCYEEKQIQAKTS	Q7Z5K2	162	ASISSCNKLITSDKV
O00443	1539	HPLLRDEKAEGIARS	P46379	1033	IQSQRKVKPQPPLSD	Q7Z5K2	168	NKLITSDKVENFHEE
O00443	94	ALDIDVEKLTQAELE	P46379	1049	YLSGMPAKRRKTMQG	Q7Z5K2	313	QGASNFDKLMDGTSQ
O00444	538	SDNAHSVKQQNTMKY	P46379	56	SVSIPSEKQRLIYQG	Q7Z5K2	34	KRTTLSTKWGETTFM
O00461	156	TFNDHKQKYLQLQQE	P46379	70	GRVLQDDKKLQEYNV	Q7Z5K2	52	GQKRPNFKPDIQEIP
O00471	132	QRAVEAQKLMKYFNE	P46459	198	SSLNLIGKAKTKENR	Q7Z5K2	604	KAPAPPSKVIKTVTI
O00471	63	MDERIQRKVEKLEQQ	P46459	254	QMGCKHVKGILLYGP	Q7Z5K2	630	LKCRREDKELYTVVQ
O00472	162	PGGPYVGKRVQIRKA	P46459	266	YGPPGCGKTLLARQI	Q7Z5K2	7	*MTSRFGKTYSRKGG
O00472	584	KRLSPGSKEYQNVHE	P46459	293	NGPEILNKYVGESEA	Q7Z5K2	758	EQDASSAKLLNEKDM
O00479	31	RSARLSAKPAPPKPE	P46459	401	EIGLPDEKGRLQILH	Q7Z5K2	763	SAKLLNEKDMNKIKE
O00479	36	SAKPAPPKPEPRPKK	P46459	639	KAPPQGRKLLIIGTT	Q7Z5K2	911	SICLADSKPLPHQNV
O00479	51	ASAKKGEKLPKGRKG	P46459	709	KVWIGIKKLLMLIEM	Q7Z5L9	236	PTDLGAHKRPASVSS
O00479	64	KGKADAGKDGNNPAK	P46459	728	DPEYRVRKFLALLRE	Q7Z5L9	289	LSAEGAGKSRGSGEQ
O00479	82	ASTLQSQKAEGTGDA	P46527	100	RPPKGACKVPAQESQ	Q7Z5L9	348	ANGANGSKAVARTAR
O00482	107	LLTCESCKGFFKRTV	P46531	1795	GEDSVGLKPLKNASD	Q7Z5V6	100	PLEVPDGKHPLPWSM
O00482	111	ESCKGFFKRTVQNNK	P46531	2150	NGYLGSLKPGVQGKK	Q7Z628	9	EPELAAQKQPRPRRR
O00483	55	NNPEPWNKLGPNDQY	P46531	2171	KGLACGSKEAKDLKA	Q7Z6E9	1177	LEVTEIVKPSPKRKM
O00483	73	SVNVDYSKLKKERPD	P46734	183	ALEHLHSKLSVIHRD	Q7Z6E9	1207	ISLSAPAKKIKLNRE
O00487	152	VDPIQSVKGKVVIDA	P46734	32	LRISCMSKPPAPNPT	Q7Z6E9	1234	NTKEPSEKLESTSSK
O00487	239	QDYSEHCKHNESVVK	P46736	305	LQELQQEKEELMQEL	Q7Z6E9	1241	KLESTSSKVKQEKVK
O00487	246	KHNESVVKEMLELAK	P46776	110	VVRSGYYKVLGKGKL	Q7Z6E9	130	ANASEEDKIKAMMSQ
O00487	257	ELAKNYNKAVEEEDK	P46776	125	PKQPVIVKAKFFSRR	Q7Z6E9	1344	QPISSVGKPASVIKN
O00487	264	KAVEEEDKMTPEQLA	P46776	127	QPVIVKAKFFSRRAE	Q7Z6E9	1355	VIKNVSTKPSNIVKY
O00487	273	TPEQLAIKNVGKQDP	P46776	136	FSRRAEEKIKSVGGA	Q7Z6E9	1372	KESEPSEKIQKFTKD
O00499	28	KLTRAQEKVLQKLGK	P46776	47	HHRINFDKYHPGYFG	Q7Z6E9	1378	EKIQKFTKDVSHEII
O00506	126	TILREILKGLDYLHS	P46776	55	YHPGYFGKVGMKHYH	Q7Z6E9	1413	RDYSVLEKENPEKRK
O00506	350	QKPAEPVKRQPRSQC	P46776	59	YFGKVGMKHYHLKRN	Q7Z6E9	1563	EETKSVDKNPCKDRE
O00507	1724	GGSFADQKICQGCPH	P46776	94	RVNAAKNKTGAAPII	Q7Z6E9	1571	NPCKDREKHVLEARN
O00507	313	DALSMIIKSLKNLAS	P46777	10	FVKVVKNKAYFKRYQ	Q7Z6E9	172	GKPGHYIKNCPTNGD
O00507	413	HQPQYVEKLEKILRF	P46777	158	ARTTTGNKVFGALKG	Q7Z6E9	180	NCPTNGDKNFESGPR
O00507	500	RRLAEDDKDGVMAHK	P46777	164	NKVFGALKGAVDGGL	Q7Z6E9	217	AMLTNTGKYAIPTID
O00507	746	KCFERFFKAVNCRER	P46777	178	LSIPHSTKRFPGYDS	Q7Z6E9	232	AEAYAIGKKEKPPFL
O00512	1015	IMMSRMSKFAMPSST	P46777	188	PGYDSESKEFNAEVH	Q7Z6E9	313	PDALIANKFLRQAVN
O00512	1244	SRIIPSEKPSQTLQY	P46777	19	YFKRYQVKFRRRREG	Q7Z6E9	657	EEEKKKSKLDEFTND
O00512	171	TEPTPAQKTPAKVVY	P46777	197	FNAEVHRKHIMGQNV	Q7Z6E9	7	*MSCVHYKFSSKLNY
O00512	232	SALRNDPKPLPQQPP	P46777	220	EEDEDAYKKQFSQYI	Q7Z6E9	85	GGVKSTSKTYVISRT
O00512	418	AQSQSLGKGPGPRTD	P46777	221	EDEDAYKKQFSQYIK	Q7Z6E9	929	ENAPGDGKGNKHKKH
O00512	51	SKFSNQGKQGGSASQ	P46777	241	DMMEEMYKKAHAAIR	Q7Z6I8	119	TTKAAGFKTSPGRPL
O00512	67	QPSPCDSKSGGHTPK	P46777	255	RENPVYEKKPKKEVK	Q7Z6I8	17	PAFCGPGKPSCLNED
O00512	7	*MHSSNPKVRSSPSG	P46777	256	ENPVYEKKPKKEVKK	Q7Z6I8	49	YSHTVNHKPMVCQRQ
O00512	844	VQRGLGRKPLDISVA	P46777	27	FRRRREGKTDYYARK	Q7Z6J9	293	NGVTGAGKRRWNFEQ
O00512	86	PGGSMGLKNGAGNGA	P46777	270	KKRWNRPKMSLAQKK	Q7Z6K5	13	HDGALRNKAVQSVRL
O00512	94	NGAGNGAKGKGKRER	P46777	276	PKMSLAQKKDRVAQK	Q7Z6K5	77	HRRKFDAKGNEIEPN
O00512	96	AGNGAKGKGKRERSI	P46777	41	KRLVIQDKNKYNTPK	Q7Z6M1	12	PVLEPGDKPRKATWY
O00512	98	NGAKGKGKRERSISA	P46777	43	LVIQDKNKYNTPKYR	Q7Z6P3	8	MQDVLEAKEREVQRL
O00541	152	STFPRTGKCHVQTIQ	P46777	48	KNKYNTPKYRMIVRV	Q7Z6Z7	1107	STASALTKLLTKGLS
O00541	249	LNLHYPPKLEGQAQA	P46777	5	***MGFVKVVKNKAY	Q7Z6Z7	1693	PRLNKNSKNSNGQEL
O00541	259	GQAQAEAKAGEGTYA	P46777	85	AYAHELPKYGVKVGL	Q7Z6Z7	1840	TLRHTMEKVVRSAAT
O00541	275	DSESCMEKLAALSAS	P46778	107	KSRDSFLKRVKENDQ	Q7Z6Z7	1931	LVKTTPLKPSPLPVI
O00541	331	KKLFEGLKFFLNREV	P46778	122	KKKEAKEKGTWVQLK	Q7Z6Z7	2248	NTVNAALKPLETLSR
O00541	41	FRRLCILKGIYPHEP	P46778	129	KGTWVQLKRQPAPPR	Q7Z6Z7	2267	PSSLFGSKSASSKNK
O00541	49	GIYPHEPKHKKKVNK	P46778	146	HFVRTNGKEPELLEP	Q7Z6Z7	25	DCRALIDKLKVCNDE
O00541	521	GTLKLEDKQRLAQEE	P46778	36	TYMRIYKKGDIVDIK	Q7Z6Z7	509	PQRAALLKSMLNFLK
O00541	533	QEEESEAKRLAIMMM	P46778	43	KGDIVDIKGMGTVQK	Q7Z6Z7	516	KSMLNFLKKAIQDPA
O00541	68	ARTFYLIKDIRFLLH	P46778	50	KGMGTVQKGMPHKCY	Q7Z6Z7	696	CNLGRDPKYICQKPS
O00541	81	LHEPIVNKFREYKVF	P46778	60	PHKCYHGKTGRVYNV	Q7Z6Z7	701	DPKYICQKPSIQKAD
O00541	86	VNKFREYKVFVRKLR	P46778	78	AVGIVVNKQVKGKIL	Q7Z739	271	AVPPPPIKHNMNIGT
O00541	98	KLRKAYGKSEWNTVE	P46778	97	NVRIEHIKHSKSRDS	Q7Z739	407	AINNYNPKDFDWNLK
O00560	119	IREVILCKDQDGKIG	P46779	101	RHMIRKNKYRPDLRM	Q7Z739	422	NGRVFIIKSYSEDDI
O00560	124	LCKDQDGKIGLRLKS	P46779	122	SAILRSQKPVMVKRK	Q7Z739	434	DDIHRSIKYSIWCST
O00560	173	CAGWSSDKAHKVLKQ	P46779	127	SQKPVMVKRKRTRPT	Q7Z739	446	CSTEHGNKRLDAAYR
O00560	214	GHVGFIFKNGKITSI	P46779	19	NCSSFLIKRNKQTYS	Q7Z739	542	TQEVPLEKAKQVLKI
O00566	127	SEIEADDKEDLEDLE	P46779	22	SFLIKRNKQTYSTEP	Q7Z7A4	192	PDKYLSDKDFQCLIK
O00566	189	QQSKVQNKGQGKPRE	P46779	33	STEPNNLKARNSFRY	Q7Z7E8	232	ENLAILEKIKKNQRQ
O00566	193	VQNKGQGKPREKSIV	P46779	47	YNGLIHRKTVGVEPA	Q7Z7E8	234	LAILEKIKKNQRQDY
O00566	197	GQGKPREKSIVDDKF	P46779	58	VEPAADGKGVVVVIK	Q7Z7E8	390	RVQFGANKSQYSLTR
O00566	38	IQEGLASKFTSLTKV	P46779	84	YVRTTINKNARATLS	Q7Z7E8	46	PCLRRELKLLESIFH
O00566	382	EKELLEKKPWQLQGE	P46781	116	RLQTQVFKLGLAKSI	Q7Z7F0	461	PSQPQAQKRRFTEEL
O00566	446	DDVVRKEKPKEDAYE	P46781	121	VFKLGLAKSIHHARV	Q7Z7F0	505	EIEGAGSKPASSSGK
O00566	518	SNFHFIPKPPVPEIK	P46781	155	IVRLDSQKHIDFSLR	Q7Z7F0	553	GSHDYPAKKMKTTEK
O00566	609	SSVDQAGKYSKTVAS	P46781	22	TPRRPFEKSRLDQEL	Q7Z7F0	560	KKMKTTEKGFGLVAY
O00566	618	SKTVASEKLKQLTKT	P46781	30	SRLDQELKLIGEYGL	Q7Z7F0	73	INAMLMAKGKLKPTQ
O00566	649	SSQAFFSKLQDQVKM	P46781	47	KREVWRVKFTLAKIR	Q7Z7F0	75	AMLMAKGKLKPTQNA
O00567	134	LHFHNLVKGLTDLSA	P46781	52	RVKFTLAKIRKAARE	Q7Z7H5	128	MALFAGGKLRVHLDI
O00567	143	LTDLSACKAQLGLGH	P46781	66	ELLTLDEKDPRRLFE	Q7Z7H5	172	DQVEQIQKEQDYQRY
O00567	158	SYSRAKVKFNVNRVD	P46781	91	IGVLDEGKMKLDYIL	Q7Z7H5	218	IWQMRHLKSFFEAKK
O00567	202	YHFPELVKIINDNAT	P46781	93	VLDEGKMKLDYILGL	Q7Z7K6	11	SRSSAAAKLRGQKRS
O00567	227	RRELNEDKLEKLEEL	P46782	167	EAAFRNIKTIAECLA	Q7Z7K6	210	TYTFNTHKAQHTFCK
O00567	240	ELTMDGAKAKAILDA	P46782	18	VAETPDIKLFGKWST	Q7Z7K6	217	KAQHTFCKRCGVQSF
O00567	288	LHTYLRSKMSQVAPS	P46782	182	DELINAAKGSSNSYA	Q7Z7K6	270	MKEHKTIKNMSKE**
O00567	320	GSLTNLAKYPASTVQ	P46782	191	SSNSYAIKKKDELER	Q7Z7K6	52	SASQAGSKSQAVEKP
O00567	333	VQILGAEKALFRALK	P46782	42	LQDYIAVKEKYAKYL	Q7Z7K6	63	VEKPPSEKPRLRRSS
O00567	347	KTRGNTPKYGLIFHS	P46782	47	AVKEKYAKYLPHSAG	Q7Z7L1	153	REAFCFLKTKRKPKI
O00567	375	ISRYLANKCSIASRI	P46783	107	ETGRPRPKGLEGERP	Q86SE5	17	VTNKNDPKSINSRVF
O00567	396	PTSVFGEKLREQVEE	P46783	24	KEGVMVAKKDVHMPK	Q86SE5	170	VTTTRRGKGVFSMKG
O00567	478	ECEEMSEKPKKKKKQ	P46783	31	KKDVHMPKHPELADK	Q86SE5	225	EKIEKQQKAEAEAQK
O00567	505	DPSISFSKPKKKKSF	P46783	38	KHPELADKNVPNLHV	Q86SE8	202	KSPVKKAKATARAKK
O00567	514	KKKKSFSKEELMSSD	P46783	47	VPNLHVMKAMQSLKS	Q86SQ0	285	LGNSKRTKLGEKDLP
O00567	540	KRKKSTPKEETVNDP	P46783	53	MKAMQSLKSRGYVKE	Q86SQ0	511	TRYRCHRKDSLPDAD
O00567	578	GPEEAVGKSSSKKKK	P46783	59	LKSRGYVKEQFAWRH	Q86SQ0	69	LSQPVPAKRSPSPLG
O00567	87	LETHLPSKKKKVLLG	P46821	506	LEGLEKLKHLDFLKQ	Q86SX6	53	DALVKKDKVVVFLKG
O00571	118	GDRSGFGKFERGGNS	P46926	124	ECDAFEEKIKAAGGI	Q86SZ2	35	ENGRCITKLENMGFR
O00571	130	GNSRWCDKSDEDDWS	P46926	264	GLMLVHNKLVDPLYS	Q86SZ2	70	DIMKFICKDFWTTVF
O00571	138	SDEDDWSKPLPPSER	P46926	50	STPLGCYKKLIEYYK	Q86SZ2	98	IYVLQDNKFRLLTQM
O00571	215	KHAIPIIKEKRDLMA	P46926	64	KNGDLSFKYVKTFNM	Q86T24	145	LPPDSGDKNLVIQKS
O00571	335	VDMMERGKIGLDFCK	P46934	566	VKGYLRLKMTYLPKT	Q86T24	407	NDPGVGSKHLMEGQK
O00571	418	TSENITQKVVWVEES	P46934	961	KQNDIPNKFEMKLRR	Q86T24	474	SGSEMANKRMKVKHD
O00571	427	VWVEESDKRSFLLDL	P46937	280	ISQSAPVKQPPPLAP	Q86T65	182	TSLIGCIKALMNNSQ
O00571	452	LVFVETKKGADSLED	P46937	315	LQQLQMEKERLRLKQ	Q86T82	172	NPGRGSIKTVAGSGI
O00571	491	LHQFRSGKSPILVAT	P46937	90	TVPMRLRKLPDSFFK	Q86T82	314	QPVPLSVKKLRCNQD
O00571	50	LRNREATKGFYDKDS	P46937	97	KLPDSFFKPPEPKSH	Q86T82	68	VLRPSGAKQSRLMLT
O00571	511	GLDISNVKHVINFDL	P46940	1027	YLLLRLFKTALQEEI	Q86TA1	20	KTFRPKRKFEPGTQR
O00571	55	ATKGFYDKDSSGWSS	P46940	1037	LQEEIKSKVDQIQEI	Q86TB3	528	GGKDLWSKRGSRKSA
O00571	66	GWSSSKDKDAYSSFG	P46940	1088	DDKSLNIKTDPVDIY	Q86TB9	474	AKLEHAYKPVQFEGS
O00571	81	SRSDSRGKSSFFSDR	P46940	1111	SQTGEASKLPYDVTP	Q86TB9	484	QFEGSLGKLTVSSVN
O00584	112	PNRSRFWKHEWEKHG	P46940	1128	ALAHEEVKTRLDSSI	Q86TB9	495	SSVNNPRKMIDAVVT
O00623	99	IVMGDTHKSQRLASA	P46940	1144	NMRAVTDKFLSAIVS	Q86TB9	625	RNLPFLIKKDAQDEV
O00625	234	QVENKDPKRSHFVLI	P46940	1174	LKDSLHEKFPDAGED	Q86TG7	155	PAFMMEMKHVFEDPQ
O00635	142	GYKEKLQKAVTKLKQ	P46940	1230	RNLGSIAKMLQHAAS	Q86TI0	1124	KLLSSESKLKQAMLT
O00635	158	EDRCTEQKLSTAMRI	P46940	1261	YLSQSYQKFRRFFQT	Q86TI2	167	FHCRDGGKNGFMVSP
O00635	167	STAMRITKWKEKVQI	P46940	1445	MKKSKSVKEDSNLTL	Q86TI2	314	RTGSKNPKIALKLAE
O00635	184	QKIRSDFKNLQCFLH	P46940	1464	EKIQTGLKKLTELGT	Q86TI2	51	YSGLIVNKAPHDFQF
O00712	318	SSPTTMKKPEKPLFS	P46940	1475	ELGTVDPKNKYQELI	Q86TI2	828	SQLIRAGKPYQLQIY
O00716	168	LRSPDSPKTPKSPSE	P46940	1477	GTVDPKNKYQELIND	Q86TS9	97	AWQLRQQKLQEEQRK
O00716	171	PDSPKTPKSPSEKTR	P46940	1528	GEQVDYYKSYIKTCL	Q86TU7	340	SHDRVKIKLGVSKSD
O00743	17	VEIARLCKYLPENDL	P46940	1532	DYYKSYIKTCLDNLA	Q86U42	135	EMEEEAEKLKELQNE
O00743	231	FVHINNLKLICRAHQ	P46940	1562	KSKKISLKYTAARLH	Q86U42	137	EEEAEKLKELQNEVE
O00743	245	QLVHEGYKFMFDEKL	P46940	1571	TAARLHEKGVLLEIE	Q86U42	207	RVTILCDKFSGHPKG
O00743	25	YLPENDLKRLCDYVC	P46940	186	EEEINNMKTELEKYG	Q86U44	12	WSSIQAHKKQLDSLR
O00743	275	IASIMVFKDVNTREP	P46940	348	QNSDWYLKQLLSDKQ	Q86U44	152	VTYADHSKLSAMMGA
O00746	91	HYQDLRRKPFYPALI	P46940	368	GQTDPLQKEELQSGV	Q86U44	281	EFCDYGTKEECMKAS
O00748	539	AHRLQFWKKALPQKI	P46940	51	LCHLEEAKRWMEACL	Q86U44	576	YPDGIISKPKNL***
O00754	226	GRLDYQDKWVRMQKL	P46940	672	HSDLAEAKKKKLAVG	Q86U70	13	ACPGCSSKSFKLYSP
O00762	119	NICLDILKEKWSALY	P46940	684	AVGDNNSKWVKHWVK	Q86U70	16	GCSSKSFKLYSPKEP
O00763	454	IGFPLMIKASEGGGG	P46940	80	RNGVYLAKLGNFFSP	Q86U70	393	ANSPWNSKPPSSQES
O00763	663	ENPDEGFKPSSGTVQ	P46940	871	PPMVVVRKFVHLLDQ	Q86U86	1019	FLEKEVFKSDYYNKV
O00764	258	NLKVACEKTVSTLHH	P46940	88	LGNFFSPKVVSLKKI	Q86U86	1025	FKSDYYNKVPVSKIL
O14497	1007	SSTTTNEKITKLYEL	P46940	922	IKIGLLVKNKITLQD	Q86U86	1167	VGDCVFIKSHGLVRP
O14497	1069	GGLTQVNKNKKWREL	P46940	935	QDVVSHSKKLTKKNK	Q86U86	1293	DEIYYFRKPIVPQKE
O14497	1230	RMSYEPNKDPYGSMR	P46940	953	SDMMMINKQKGGLKA	Q86U86	135	KPDSPEYKAACKLWD
O14497	1382	GTYGPPAKRHEGEMY	P46940	997	IFQMPQNKSTKFMDS	Q86U86	139	PEYKAACKLWDLYLR
O14497	1603	ENRTSPSKSPFLHSG	P47712	155	MALCDQEKTFRQQRK	Q86U86	1626	AESNSISKWDQTLAA
O14497	1612	PFLHSGMKMQKAGPP	P47712	595	KELLLAEKWAKMNKL	Q86U86	250	KSIHAMAKDIDLLAK
O14497	1662	QRRRLTMKDIGTPEA	P47712	598	LLAEKWAKMNKLPFP	Q86U86	414	PFYHLPSKKKYPDYY
O14497	1808	SEEKLISKFDKLPVK	P47736	262	VYCNFRNKEIMFHVS	Q86U86	475	AIYKRVLKLQQVMQA
O14497	1811	KLISKFDKLPVKIVQ	P47736	378	NAEYACYKAEKFAKL	Q86U86	511	TSDTGSAKRKSKKNI
O14497	1815	KFDKLPVKIVQKNDP	P47736	384	YKAEKFAKLEERTRA	Q86U86	549	LCDLFMVKPSKKDYP
O14497	1819	LPVKIVQKNDPFVVD	P47755	133	TALRAYVKEHYPNGV	Q86U86	579	EHNIRNDKYAGEEGM
O14497	1830	FVVDCSDKLGRVQEF	P47755	146	GVCTVYGKKIDGQQT	Q86U86	616	NDAHILEKLLKEKRK
O14497	1880	PCPPAPRKHVTTAEG	P47755	19	EKVRIAAKFIIHAPP	Q86U86	954	YSQDCSFKNSMYHVG
O14497	1905	PPDGPPEKRITATMD	P47755	273	RTKIDWNKILSYKIG	Q86U90	116	LKGRSEAKPLAVCLG
O14497	1928	TLTEDGAKSSEAIKE	P47755	278	WNKILSYKIGKEMQN	Q86UA1	346	KRPYFHVKPLEKAQL
O14497	1938	EAIKESSKFPFGISP	P47755	86	HGDLGNGKFLDPKNR	Q86UE4	185	NSSRHDGKEVDEGAW
O14497	1953	AQSHRNIKILEDEPH	P47755	97	PKNRICFKFDHLRKE	Q86UE4	195	DEGAWETKISHREKR
O14497	2020	KLILLHHKHPERKQA	P47756	136	AGVILIKKAGDGSKK	Q86UE4	303	QISAGEEKWNSVSPA
O14497	2146	PPFSRLEKLYSTMVR	P47756	142	KKAGDGSKKIKGCWD	Q86UE4	314	VSPASAGKRKTEPSA
O14497	25	PPPPSELKKAEQQQR	P47756	159	HVVEVQEKSSGRTAH	Q86UE4	334	GDANTNGKDWGRSWS
O14497	250	AAAAAGSKPPPSSSA	P47756	199	SLTRQMEKDETVSDC	Q86UE4	479	DLPVNTSKTRPKQEK
O14497	51	AAERGEMKAAAGQES	P47756	223	LVEDMENKIRSTLNE	Q86UE4	491	QEKAFSLKTISTSDP
O14497	71	GPPQPLGKELQDGAE	P47756	235	LNEIYFGKTKDIVNG	Q86UE8	565	QHKLMSEKEARSIIM
O14497	980	VKLTPATKMNNKADG	P47756	57	ARDKVVGKDYLLCDY	Q86UE8	679	YQCLYGRKPFGHNQS
O14529	1180	VVLAPEEKEALRKAY	P47756	78	YRSPWSNKYDPPLED	Q86UK7	190	HRGHPLCKFCDERYL
O14530	116	RHLAILSKKHLETKF	P47756	95	MPSARLRKLEVEANN	Q86UK7	238	LREHFREKHFLCEEG
O14530	122	SKKHLETKFLKLNVE	P47813	56	AMCFDGVKRLCHIRG	Q86UK7	337	RRGSWRYKREEEDRE
O14530	208	KFGTNFTKLEKKTIR	P47895	284	VTLELGGKNPCIVCA	Q86UK7	514	WNSSSSSKKVAQPPL
O14531	293	DGSHYWSKNWAKAAA	P47897	158	GEARAVLKWADGKMI	Q86UK7	80	RQVVFGKKLPAFATI
O14545	103	ELSILKLKEHEDYCG	P47897	309	FDDTNPEKEEAKFFT	Q86UP0	258	DVNDNPPKFPQSLYQ
O14545	77	LEKRLLKKHEETECP	P47897	366	HQRGEELKGHNTLPS	Q86UP2	1100	EWLHGFEKKAKECMA
O14548	4	****MYYKFSGFTQK	P47897	394	FEAMRKGKFSEGEAT	Q86UP2	1116	TSGSEEVKVLEHKLK
O14548	65	NKVPELQKFFQKADG	P47897	412	KLVMEDGKMDPVAYR	Q86UP2	1123	KVLEHKLKEADEMHT
O14548	69	ELQKFFQKADGVPVY	P47897	421	DPVAYRVKYTPHHRT	Q86UP2	1138	LLQLECEKYKSVLAE
O14556	119	EYMVYMFKYDSTHGR	P47897	496	LHYAVVSKRKILQLV	Q86UP2	1140	QLECEKYKSVLAETE
O14556	151	EISVYQCKEPKQIPW	P47897	586	ITNFPAAKSLDIQVP	Q86UP2	1152	ETEGILQKLQRSVEQ
O14556	154	VYQCKEPKQIPWRAV	P47897	620	FIERTDFKEEPEPGF	Q86UP2	1163	SVEQEENKWKVKVDE
O14556	287	PASTGAAKAVTKVIP	P47897	628	EEPEPGFKRLAWGQP	Q86UP2	1268	QLNETLTKLRTEQNE
O14556	291	GAAKAVTKVIPELKG	P47897	740	ALAKPFDKFQFERLG	Q86UP2	201	LPLHQETKQESGSGK
O14558	160	APPPAAAK*******	P47897	759	DPDSHQGKLVFNRTV	Q86UP2	256	REVIDLLKPDQVEGI
O14561	151	IVDYIADKKDVYE**	P47897	769	FNRTVTLKEDPGKV*	Q86UP2	265	DQVEGIQKSGTKKLK
O14561	152	VDYIADKKDVYE***	P47914	103	LAYIAHPKLGKRARA	Q86UP2	269	GIQKSGTKKLKTETD
O14561	88	DRVLYVLKLYDKIDP	P47914	130	AKAKAKAKDQTKAQA	Q86UP2	270	IQKSGTKKLKTETDK
O14561	92	YVLKLYDKIDPEKLS	P47914	134	AKAKDQTKAQAAAPA	Q86UP2	285	ENAEVKFKDFLLSLK
O14561	97	YDKIDPEKLSVNSHF	P47914	149	SVPAQAPKRTQAPTK	Q86UP2	320	GVIQDALKKSSKGEL
O14562	126	GLPPAMQKVMYKGLV	P47914	33	SQRYESLKGVDPKFL	Q86UP2	345	DKLLAAVKEDAAATK
O14562	196	QHRKVLDKGKPEDVM	P47914	38	SLKGVDPKFLRNMRF	Q86UP2	352	KEDAAATKDRCKQLT
O14578	1721	RYNENLSKYCIRKEI	P47914	63	KMQANNAKAMSARAE	Q86UP2	366	TQEMMTEKERSNVVI
O14578	1899	KLRVICCKGNLVKES	P47914	73	SARAEAIKALVKPKE	Q86UP2	385	DRIGTLEKEHNVFQN
O14578	518	ITECSSLKRSLEQAR	P47914	77	EAIKALVKPKEVKPK	Q86UP2	423	EAEIAHLKQENGILR
O14579	278	NRYLSQLKDAHRSHP	P47914	82	LVKPKEVKPKIPKGV	Q86UP2	465	LVNELTEKTGKLQQE
O14579	65	RAYLAQRKFGVVLDE	P48047	158	EATLSELKTVLKSFL	Q86UP2	521	AQQDLQSKFVAKENE
O14602	104	ADEARSLKAYGELPE	P48047	162	SELKTVLKSFLSQGQ	Q86UP2	525	LQSKFVAKENEVQSL
O14602	29	EKRELVFKEDGQEYA	P48047	172	LSQGQVLKLEAKTDP	Q86UP2	535	EVQSLHSKLTDTLVS
O14602	56	ALCFDGVKRLCHIRG	P48047	176	QVLKLEAKTDPSILG	Q86UP2	543	LTDTLVSKQQLEQRL
O14602	88	LRDYQDNKADVILKY	P48047	192	MIVRIGEKYVDMSVK	Q86UP2	633	ERDRLTSKEEELKDI
O14602	94	NKADVILKYNADEAR	P48047	199	KYVDMSVKTKIQKLG	Q86UP2	653	LLKAEVQKLQALANE
O14604	12	PGMAEIEKFDKSKLK	P48047	54	SAASKQNKLEQVEKE	Q86UP2	670	AAAHELEKMQQSVYV
O14604	15	AEIEKFDKSKLKKTE	P48047	60	NKLEQVEKELLRVAQ	Q86UP2	678	MQQSVYVKDDKIRLL
O14604	17	IEKFDKSKLKKTETQ	P48047	70	LRVAQILKEPKVAAS	Q86UP2	696	LQHEISNKMEEFKIL
O14604	19	KFDKSKLKKTETQEK	P48047	84	SVLNPYVKRSIKVKS	Q86UP2	711	NDQNKALKSEVQKLQ
O14604	4	****MSDKPGMAEIE	P48047	90	VKRSIKVKSLNDITA	Q86UP2	727	LVSEQPNKDVVEQME
O14607	20	VAFGDEAKKMAEGKA	P48047	98	SLNDITAKERFSPLT	Q86UP2	740	MEKCIQEKDEKLKTV
O14607	26	AKKMAEGKASRESEE	P48048	202	SKNAVISKRGGKLCL	Q86UP2	800	ASLVEELKKVIHEKD
O14607	746	VGTGTCDKVNNIHPA	P48059	132	EKARGLGKYICQKCH	Q86UP2	823	LLEAELLKVANKEKT
O14607	808	VNGEGLGKSQSSTKV	P48059	137	LGKYICQKCHAIIDE	Q86UP2	835	EKTVQDLKQEIKALK
O14617	352	ILQCLDDKDESIRLR	P48059	290	TKLTLKNKFVEFDMK	Q86UP2	842	KQEIKALKEEIGNVQ
O14617	580	SCILQLVKHIQKLQA	P48059	297	KFVEFDMKPVCKKCY	Q86UP2	971	QDVQDENKLFKSQIE
O14617	584	QLVKHIQKLQAKDVP	P48059	301	FDMKPVCKKCYEKFP	Q86UP2	974	QDENKLFKSQIEQLK
O14628	408	QRNEIGGKPFKCEEC	P48061	64	LQIVARLKNNNRQVC	Q86UP3	2948	KFKINIGKPFMINQG
O14646	1041	LEPERNSKNWEEIIP	P48067	645	DTLLQRLKNATKPSR	Q86UQ4	3590	SVASMVRKLVYEQEI
O14646	1078	PRMRNCAKQISFNGS	P48147	157	WVTIKFMKVDGAKEL	Q86UQ8	43	DLPLRPRKQATAAGQ
O14646	1160	RDAELVDKSETDLRR	P48147	172	PDVLERVKFSCMAWT	Q86US8	157	RRLQTVSKESASRVE
O14646	1178	LVHNGCIKALKDSSS	P48147	449	YPSKDGTKIPMFIVH	Q86US8	53	RPDLEIYKPGLSRLR
O14646	1330	LSGAGSSKRRKARAK	P48147	75	TELYDYPKYSCHFKK	Q86UU0	108	VPPFSSLKGKVKRDR
O14646	1436	KQLDRPEKGLSEREQ	P48147	81	PKYSCHFKKGKRYFY	Q86UU0	110	PFSSLKGKVKRDRSV
O14646	1453	HTRQCLIKIGDHITE	P48163	422	CSAEQCYKITKGRAI	Q86UU0	1334	SRIIPSEKPSSTLQY
O14646	1463	DHITECLKEYTNPEQ	P48163	60	IQVLRVVKNFEHLNS	Q86UU0	137	PSLDSEAKEVAPRSK
O14646	401	IIAHSNQKSAAGYPD	P48163	84	DLQDRNEKLFYRVLT	Q86UU0	36	HCPPAPAKPMHPENK
O14646	634	YKTLIDFKSNHRLLI	P48382	158	LGGRGQSKYCYSGIR	Q86UU0	43	KPMHPENKLTNHGKT
O14646	77	RENKVQAKPPKVDGA	P48382	428	GDQGPHDKGVKRTAE	Q86UU0	432	GETEPFLKGPPGGAG
O14646	945	QRMDTTGKTVLHTGS	P48382	541	QGDGTVSKGGRGPGS	Q86UU0	49	NKLTNHGKTGNGGAQ
O14646	962	SSSTPFNKEELSAIL	P48382	557	HTKEAEDKIPLVPSK	Q86UU0	7	*MRILANKTRLPHPR
O14654	671	TKECKEAKEVKDAEI	P48382	564	KIPLVPSKVSVIKGS	Q86UU0	73	PTCNVGSKGVGAGNH
O14686	1283	GTAISGGKAEGEKGR	P48382	569	PSKVSVIKGSRSQKE	Q86UU0	83	GAGNHGAKANQISPS
O14686	1288	GGKAEGEKGRRRSSP	P48382	593	DTAPQGNKDLKEHVL	Q86UV5	689	APEFPSYKECCSQCK
O14686	1690	ESKKRKRKPYRPGIG	P48426	145	YDKRYIIKTITSEDV	Q86UV5	696	KECCSQCKILEREGE
O14686	1815	GDGGSERKELPTSQK	P48426	15	GSSVLASKTKTKKKH	Q86UV5	9	APRLQLEKAAWRWAE
O14686	1822	KELPTSQKGDDGPDI	P48426	378	AHAAKTVKHGAGAEI	Q86UV5	956	VSANQTLKELKIQIM
O14686	1840	ESRGLEGKADTPGPE	P48426	89	ENMPSHFKFKEYCPM	Q86UW6	1440	QEEVSCGKFMQDPSL
O14686	1889	ELPKMESKDLQQLFK	P48436	141	ELSKTLGKLWRLLNE	Q86UW6	1722	EFKQNGGKPYLSVIT
O14686	2051	QIMKLWRKVPAADKA	P48436	253	QPGKADLKREGRPLP	Q86UW6	1761	SFRFSEIKPGCLKVM
O14686	2057	RKVPAADKAPYLQKA	P48436	398	QSQRTHIKTEQLSPS	Q86UW6	337	KHPELPTKGKDVSYC
O14686	2089	SQINKQTKVGDIARK	P48436	61	PKGEPDLKKESEEDK	Q86UW6	590	MSSSVPEKIERIELC
O14686	2246	STPDPFLKPRCPSLD	P48444	14	AVCTKAGKAIVSRQF	Q86UW6	795	VGDWPVDKTIGQRTK
O14686	2289	RKALEVKKEELGASS	P48444	142	EMDSHEEKVFRAVRE	Q86UW6	826	YNYPQSHKLVNSVSV
O14686	2468	DPFAPLHKPPRPQPP	P48444	211	IIETDKPKVAPAPAR	Q86UW9	249	QAFAPYNKPSLSGAR
O14686	2480	QPPEVAFKAGSLAHT	P48444	224	ARPSGPSKALKLGAK	Q86UX7	419	DVNVSGQKFCIKLLV
O14686	2509	PAGELHAKVPSGQPP	P48444	231	KALKLGAKGKEVDNF	Q86UX7	5	***MAGMKTASGDYI
O14686	2644	GITSPVEKREDPGTG	P48444	233	LKLGAKGKEVDNFVD	Q86UX7	590	LAVGDVVKTWRFSNM
O14686	2679	LSQTELEKQRQRQRL	P48444	241	EVDNFVDKLKSEGET	Q86UX7	69	HAIWWEQKRQWLLQT
O14686	2745	PFAGTQDKSSLVGLP	P48444	256	IMSSSMGKRTSEATK	Q86UY8	248	YEPVHLYKDVKDSIR
O14686	2755	LVGLPPSKLSGPILG	P48444	309	MLRISDDKYGRIRLH	Q86V15	345	KYDLENVKYLHLFKP
O14686	2886	ELRHNVQKGLGPGGT	P48444	335	QTHPNVDKKLFTAES	Q86V15	351	VKYLHLFKPGEGSPD
O14686	2933	VSGLPPQKPSAPPAP	P48444	347	AESLIGLKNPEKSFP	Q86V15	886	RLAAAALKPSATFDP
O14686	2985	PLALEAGKLPCEDPE	P48444	351	IGLKNPEKSFPVNSD	Q86V20	400	SRVLQVAKKMKLISN
O14686	3079	LVESANEKAEREALL	P48444	363	NSDVGVLKWRLQTTE	Q86V21	489	SGELVCTKPIPCQPT
O14686	3119	ASVLPEVKPKVEEGG	P48444	44	PKLMNTGKQHTFVET	Q86V21	646	VKQIIAGKAVEQGGA
O14686	3121	VLPEVKPKVEEGGRH	P48506	182	FPDEAINKHPRFSTL	Q86V48	19	SSRHLRFKLQSLSRR
O14686	3140	QFTIATPKVEPAPAA	P48506	200	IRHRRGEKVVINVPI	Q86V48	541	SSETVFGKRGHVLGN
O14686	3155	NSLGLGLKPGQSMMG	P48506	338	SIDSYLSKCGEKYND	Q86V48	604	SKAPVLSKYPYSCRS
O14686	3182	SSGHTAEKASFGATG	P48506	488	QGMFYFRKDICKGGN	Q86V48	685	ITPEPEPKPQPNSRE
O14686	3433	KAKMVALKGIKKVMA	P48506	492	YFRKDICKGGNAVVD	Q86V48	93	EDLCRLMKEKLEEEE
O14686	3436	MVALKGIKKVMAQGS	P48506	560	CSILNYLKLIKKRAS	Q86V48	95	LCRLMKEKLEEEENL
O14686	3563	FPEADAEKLKLVTEQ	P48506	81	VLETLQEKGERTNPN	Q86V81	161	ERKADALKAMKQYNG
O14686	3573	LVTEQQSKIQKQLDQ	P48507	263	SRGIIKSKGYILQAK	Q86V81	164	ADALKAMKQYNGVPL
O14686	3576	EQQSKIQKQLDQVRK	P48507	9	GTDSRAAKALLARAR	Q86V81	235	RGAGRNSKQQLSAEE
O14686	4004	LGPGMPAKPLQHFSS	P48507	90	PDEREEMKVSAKLFI	Q86V81	4	****MADKMDMSLDD
O14686	417	GPLQCEAKPLGKAGV	P48551	399	SGPCERRKSPLQDPF	Q86V81	86	RPKQLPDKWQHDLFD
O14686	4432	ALGAQSVKREANGEP	P48552	111	SIMNLNVKKEALLAG	Q86V85	94	HGYSCSEKLSKAQLT
O14686	4465	AGHLLLQKLLRAKNV	P48552	158	QQIRQSLKEQGYALS	Q86VF7	916	MKVEWAKKAYGLQSD
O14686	4494	INGHIDSKLAGLEQK	P48552	286	YSREHALKTQNANQA	Q86VH5	450	KRYPASMKQLQQRSL
O14686	4509	LQGTPSNKEDAAARK	P48552	310	RLQENGQKDVGSYQL	Q86VI3	1011	YLLLQLFKTALQEEI
O14686	4516	KEDAAARKPLTPKPK	P48552	446	VPIDLSCKHRTEKSE	Q86VI3	938	SDMMVLDKQKGLKSL
O14686	4653	EELGEHPKDAASARD	P48552	481	KVPDVDIKEDQDTSK	Q86VM9	168	GTPREEGKAGVQSVG
O14686	4672	LRDTSEVKSLDLLAA	P48552	963	SVADSKKKGHKNNVT	Q86VM9	177	GVQSVGEKESLEAAK
O14686	4756	IPVFPDTKPYGALGL	P48552	966	DSKKKGHKNNVTNSK	Q86VM9	184	KESLEAAKEKKKEDD
O14686	4768	LGLEVPGKLPVTTWE	P48556	111	RKSPNLSKCGEELGR	Q86VM9	211	DLEEGEVKDPSDRKV
O14686	4776	LPVTTWEKGKGSEVS	P48556	138	TTGTKLTKQQLILAR	Q86VM9	499	SRQAEPPKKEAATTG
O14686	4832	RAGTEPKKGEAEGPG	P48556	227	IQTNVYIKHPVSLEQ	Q86VM9	622	HRPSIRTKGEPAPPP
O14686	4841	EAEGPGGKEKGLEGK	P48556	281	CIEKAYEKILFTEAT	Q86VM9	631	EPAPPPGKAGEKSVK
O14686	4998	RLLLTIQKGSGRQED	P48556	297	ILFFNTPKKMTDYAK	Q86VM9	635	PPGKAGEKSVKKPAP
O14686	5276	EPVAAMRKEADMLRL	P48634	1196	AKSLAPKKPPTGPLP	Q86VM9	638	KAGEKSVKKPAPPPA
O14715	106	KIAELLCKNDVTDGR	P48634	27	LNLFDTYKGKSLEIQ	Q86VM9	651	PAPPQATKTTAPVPE
O14715	1085	ERGLGNLKILKNEVN	P48634	29	LFDTYKGKSLEIQKP	Q86VM9	661	APVPEPTKPGDPREA
O14715	1094	LKNEVNGKLRMLMRR	P48634	35	GKSLEIQKPAVAPRH	Q86VM9	783	TQPPKSAKPPAGGKS
O14715	1120	ITTTMNLKPLSGSDR	P48634	489	RRAACAEKLKRLDEK	Q86VM9	789	AKPPAGGKSSQQPST
O14715	1162	LAEEFKQKFEECQRL	P48634	49	HGLQSLGKVAIARRM	Q86VM9	814	QGTFVAHKEIKLTLL
O14715	1180	IPLQTPHKLVDTGRA	P48634	502	EKFGAPDKRLKAEPA	Q86VM9	823	IKLTLLNKAADKGSR
O14715	1189	VDTGRAAKLIQRAEE	P48634	953	PRRAGPIKKPPPPTK	Q86VM9	952	KRAKIPGKA******
O14715	1202	EEMKSGLKDFKTFLT	P48634	990	PLKITKGKLGGPKET	Q86VN1	34	YDGEEKIKFDAGTLL
O14715	123	YWVERAAKLFPGSPA	P48643	160	DSVLVDIKDTEPLIQ	Q86VP1	353	KEDTCFLKEQLRKAE
O14715	1390	ILQNYDNKQVRIVMR	P48643	170	EPLIQTAKTTLGSKV	Q86VP6	1005	QPIDPLLKNCIGDFL
O14715	1403	MRRDQVLKLCANHRI	P48643	176	AKTTLGSKVVNSCHR	Q86VP6	1072	EVEMGPFKHTVDDGL
O14715	1448	EHLAVRFKLQDVADS	P48643	210	DVDFELIKVEGKVGG	Q86VP6	132	ALAANVCKKITGRLT
O14715	1457	QDVADSFKKIFDEAK	P48643	223	GGRLEDTKLIKGVIV	Q86VP6	14	HISNLLEKMTSSDKD
O14715	1469	EAKTAQEKDSLITPH	P48643	226	LEDTKLIKGVIVDKD	Q86VP6	255	RIGEYLEKIIPLVVK
O14715	1555	IFSSEKSKPFAFGNS	P48643	232	IKGVIVDKDFSHPQM	Q86VP6	355	KVRRAAAKCLDAVVS
O14715	1595	AQSGSESKVEPKKCE	P48643	259	TCPFEPPKPKTKHKL	Q86VP6	51	DSERKVVKMILKLLE
O14715	1605	PKKCELSKNSDIEQS	P48643	265	PKPKTKHKLDVTSVE	Q86VP6	55	KVVKMILKLLEDKNG
O14715	225	LQCLESDKSDWRATN	P48643	275	VTSVEDYKALQKYEK	Q86VP6	566	FDATPYIKDLFTCTI
O14715	28	SPRQKSMKGFYFAKL	P48643	279	EDYKALQKYEKEKFE	Q86VP6	574	DLFTCTIKRLKAADI
O14715	47	KEYDLAKKYICTYIN	P48643	282	KALQKYEKEKFEEMI	Q86VP6	586	ADIDQEVKERAISCM
O14715	530	QLCTERQKSWWDAVC	P48643	284	LQKYEKEKFEEMIQQ	Q86VP6	60	ILKLLEDKNGEVQNL
O14715	615	KKVLPLLKIIKKNSI	P48643	35	LMGLEALKSHIMAAK	Q86VP6	826	GQFIQDVKNSRSTDS
O14715	791	KYSLSPSKSYKYSPE	P48643	370	SFGTTKDKMLVIEQC	Q86VP6	971	ETLLPRLKGYLISGS
O14727	679	IATCSVDKKVKIWNS	P48643	378	MLVIEQCKNSRAVTI	Q86VP6	99	CTNMLSDKEQLRDIS
O14733	149	TGHVIAVKQMRRSGN	P48643	392	IFIRGGNKMIIEEAK	Q86VS8	324	EGQVESYKKKLEDLG
O14733	373	RKRPKYNKLLEHSFI	P48643	399	KMIIEEAKRSLHDAL	Q86VS8	372	RSQLETYKRQVVELQ
O14734	188	QEVPIEIKPVNPSPL	P48643	483	EVRARQVKEMNPALG	Q86VV8	211	WNTCELLKDVIMQDF
O14734	318	KPQVSESKL******	P48643	496	LGIDCLHKGTNDMKQ	Q86VV8	811	VTDLFIGKKPIELRL
O14734	52	RHYWVPAKRLFGGQI	P48643	502	HKGTNDMKQQHVIET	Q86VV8	812	TDLFIGKKPIELRLD
O14734	91	FVRAGDPKLPVLYQV	P48643	513	VIETLIGKKQQISLA	Q86VY4	307	RNPYFQNKVLIKEYG
O14737	105	KVSQQTEKTTTVKFN	P48643	529	QMVRMILKIDDIRKP	Q86VY4	403	EGRQGPGKQPMETTQ
O14737	110	TEKTTTVKFNRRKVM	P48643	535	LKIDDIRKPGESEE*	Q86W11	315	KAFCQSSKLIRHQRI
O14737	20	RLAELQAKHGDPGDA	P48643	59	LGPNGLDKMMVDKDG	Q86W25	350	KILHSLLKKELVPLA
O14737	33	DAAQQEAKHREAEMR	P48651	12	VGSRTLSKDDVNYKM	Q86W42	107	WLWAEMLKKGCKELW
O14737	63	LSNLALVKPEKTKAV	P48651	18	SKDDVNYKMHFRMIN	Q86W42	210	VQTIEVYKHEECSRP
O14737	66	LALVKPEKTKAVENY	P48723	122	EIGRYPFKVLNKNGM	Q86W50	251	WYSCMLGKKCSLAPL
O14737	97	QGLIEILKKVSQQTE	P48729	152	GIGRHCNKLFLIDFG	Q86W50	47	GRVSLNFKDPEAVRA
O14744	200	RTLCDYSKRIAVALE	P48729	16	AEFIVGGKYKLVRKI	Q86W50	5	***MALSKSMHARNR
O14744	240	TSIFLTNKKGFPVLS	P48729	179	HIPYREDKNLTGTAR	Q86W56	12	PGCEPCTKRPRWGAA
O14744	490	EVRACREKDRDPEAQ	P48729	62	PQLLYESKLYKILQG	Q86W56	503	KPFPTHYKDLWDNKH
O14745	19	PRLCCLEKGPNGYGF	P48729	65	LYESKLYKILQGGVG	Q86W56	509	YKDLWDNKHVKMPCS
O14745	210	NGVCMEGKQHGDVVS	P48729	8	MASSSGSKAEFIVGG	Q86W56	512	LWDNKHVKMPCSEQN
O14745	240	RETDEFFKKCRVIPS	P48730	140	NFLMGLGKKGNLVYI	Q86W92	309	DIEVQKMKKAVESLM
O14745	32	GFHLHGEKGKLGQYI	P48730	57	HIESKIYKMMQGGVG	Q86W92	322	LMAANEEKDRKIEDL
O14745	34	HLHGEKGKLGQYIRL	P48735	106	DSALATQKYSVAVKC	Q86WA6	126	KDAVDLMKALKFKKV
O14745	69	VNGENVEKETHQQVV	P48735	127	EARVEEFKLKKMWKS	Q86WA6	151	TALIAAAKYPSYIHK
O14757	166	NRERLLNKMCGTLPY	P48735	133	FKLKKMWKSPNGTIR	Q86WA6	217	VDGIRQFKHLPDGNI
O14757	405	EKLGYQWKKSCMNQV	P48735	155	FREPIICKNIPRLVP	Q86WA6	243	ALIVHGEKDPLVPRF
O14757	461	HFLKIKGKLIDIVSS	P48735	166	RLVPGWTKPITIGRH	Q86WA6	257	FHADFIHKHVKGSRL
O14757	53	VDCPENIKKEICINK	P48735	180	HAHGDQYKATDFVAD	Q86WA6	271	LHLMPEGKHNLHLRF
O14757	54	DCPENIKKEICINKM	P48735	193	ADRAGTFKMVFTPKD	Q86WA6	284	RFADEFNKLAEDFLQ
O14763	369	GLMDNEIKVAKAEAA	P48735	251	WPLYMSTKNTILKAY	Q86WA8	226	VRQIEGLKLLQKTRK
O14772	465	LKMNRCLKYATMAFG	P48735	256	STKNTILKAYDGRFK	Q86WA8	275	DDIVMLEKKIRTSSM
O14772	482	DNLKKSVKTLSDIKL	P48735	263	KAYDGRFKDIFQEIF	Q86WA8	348	NDHYAMEKLKKRVLE
O14776	1016	RDKYITAKADFRTLL	P48735	272	IFQEIFDKHYKTDFD	Q86WA8	446	FLLDEVDKLGKSLQG
O14776	1024	ADFRTLLKETKFITY	P48735	275	EIFDKHYKTDFDKNK	Q86WA8	806	IIPRRNEKDLEGIPG
O14776	1027	RTLLKETKFITYRSK	P48735	280	HYKTDFDKNKIWYEH	Q86WA8	851	RPGLLNSKL******
O14776	1045	QESDQHLKDVEKILQ	P48735	282	KTDFDKNKIWYEHRL	Q86WB0	31	SPEGTPQKIRQLIDE
O14776	146	ENKTPDGKVYYYNAR	P48735	299	DMVAQVLKSSGGFVW	Q86WJ1	130	CVTYAGDKEERACLQ
O14776	444	EYKTADGKTYYYNNR	P48735	384	RGLEHRGKLDGNQDL	Q86WJ1	307	AFENETAKKVKLQNI
O14776	459	TLESTWEKPQELKEK	P48735	400	RFAQMLEKVCVETVE	Q86WJ1	630	GLVEGSTKRKRVLSP
O14776	570	IGRADVDKIIQEPPH	P48735	413	VESGAMTKDLAGCIH	Q86WJ1	816	SNVLSGIKMAALEEG
O14776	700	RYLLLNPKERKQVFD	P48735	426	IHGLSNVKLNEHFLN	Q86WR0	124	VKIVTVEKKVNEILN
O14776	753	TFSEFAAKHAKDSRF	P48735	442	TDFLDTIKSNLDRAL	Q86WR0	23	TIYMGKDKYENEDLI
O14776	761	HAKDSRFKAIEKMKD	P48735	45	HYADKRIKVAKPVVE	Q86WR0	76	MDCAHLVKANSIQGC
O14776	796	KTRGEKIKSDFFELL	P48735	48	DKRIKVAKPVVEMDG	Q86WR0	84	ANSIQGCKMNNVNVV
O14776	955	EHIEALTKKKREHFR	P48735	67	RIIWQFIKEKLILPH	Q86WR0	99	YTPWSNLKKTADMDV
O14776	992	KEDPRCIKFSSSDRK	P48735	69	IWQFIKEKLILPHVD	Q86WS4	83	VNMNRDIKMPLRKHN
O14777	517	LDDLYQQKIKEAEEE	P48735	80	PHVDIQLKYFDLGLP	Q86WX3	27	RDPPGQAKPRGAPVK
O14777	527	EAEEEDEKCASELES	P48739	116	IKIETWHKPDLGTLE	Q86X10	393	HRAVTVNKATMKTST
O14787	182	PKFLQFFKHCSPKIR	P48739	194	CPQMCAYKLVTIKFK	Q86X53	118	RRRIRKHKSKKKFKN
O14787	71	SLSGLILKNNVKAHY	P48739	199	AYKLVTIKFKWWGLQ	Q86X53	12	RKHVFVEKVLQRLFP
O14787	817	NIRDNEEKDSAFRGI	P48739	201	KLVTIKFKWWGLQSK	Q86X53	121	IRKHKSKKKFKNPNN
O14787	862	DLRDMFYKILHGFKD	P48739	215	KVENFIQKQEKRIFT	Q86X53	50	TSEKVSQKHAEPLTD
O14802	23	SHICFGMKSPEEMRQ	P48739	44	GEGIEVLKNEPYEKD	Q86X55	184	LQNHTDFKDKIVLDV
O14802	335	IPLNMAPKKWTRGFV	P48739	5	***MVLIKEFRVVLP	Q86X55	444	TCLLIANKRQSYDIS
O14802	336	PLNMAPKKWTRGFVQ	P48739	50	LKNEPYEKDGEKGQY	Q86X95	182	RNSGFALKRNVLGRN
O14802	395	KILTFPEKVNKANIN	P48739	86	GSLVFHEKAWNAYPY	Q86XE3	184	PKVAKTWKSLSKQEL
O14802	433	TQMKRFLKYGNREKM	P48788	124	MSADAMLKALLGSKH	Q86XE3	188	KTWKSLSKQELNQML
O14802	445	EKMAQELKYGDIVER	P49005	125	LPQPPRSKYIHPDDE	Q86XF0	19	SQNMGIGKNGDLPRP
O14802	65	HRMGTSEKDRPCETC	P49005	80	WGSGVGVKKLCELQP	Q86XI2	332	EMLYRLYKPILWRGL
O14810	14	QALGGATKDMGKMLG	P49006	106	KLSGLSFKRNRKEGG	Q86XI2	402	TGILGVCKITSKYWE
O14817	120	RYAQQDLKKGLHLYG	P49006	7	*MGSQSSKAPRGDVT	Q86XI2	496	VRAAKFWKICPMEHI
O14818	115	TRYIASLKQRYTQSN	P49023	355	LGVATVAKGVCGACK	Q86XI2	650	AKLYTINKFASVLPE
O14818	174	SVREFLEKNYTDEAI	P49023	540	SLCSGCQKPITGRCI	Q86XK2	116	KRTACPTKNSMEGAS
O14818	218	MRRDQSLKILNPEEI	P49023	553	CITAMAKKFHPEHFV	Q86XK2	142	KRARVSGKSQDLSAA
O14818	227	LNPEEIEKYVAEIEK	P49023	574	QLNKGTFKEQNDKPY	Q86XK3	215	SAVSEENKKLSLTQL
O14818	234	KYVAEIEKEKEENEK	P49069	72	SKQQDSDKLNSLSVP	Q86XK3	70	NSSYNVVKRLKVESE
O14818	236	VAEIEKEKEENEKKK	P49069	83	LSVPSVSKRVVLGDS	Q86XL3	555	GFLHHVKKSDPERGF
O14818	27	EYAQEAVKKGSTAVG	P49116	200	PFDVQREKPSNCAAS	Q86XN7	126	RILEQAFKGGCKAPH
O14818	52	VEKKSVAKLQDERTV	P49116	231	TPTFVADKDGARQTG	Q86XN7	165	IFPGTPLKKDGEECT
O14827	207	EDEDPDIKKIKKVQS	P49137	64	NAIIDDYKVTSQVLG	Q86XN7	176	EECTNEGKGIAARIL
O14832	108	MRDVTISKSEYAPSE	P49137	84	KVLQIFNKRTQEKFA	Q86XP1	278	VLRLQDWKCLWCKTM
O14832	116	SEYAPSEKMITKVQD	P49189	101	MECINNGKSIFEARL	Q86XP3	145	DKERKNVKGIRDDIE
O14832	120	PSEKMITKVQDFQED	P49189	239	GSVPTGMKIMEMSAK	Q86XP3	25	GFAISAGKKEEPKLP
O14867	247	RTGESSVKDIHASVQ	P49189	246	KIMEMSAKGIKPVTL	Q86XP3	26	FAISAGKKEEPKLPQ
O14874	184	RKHIEDEKLVRYFLD	P49189	298	GTRVFVQKEILDKFT	Q86XP3	270	QLMHQIRKSEYTQPT
O14874	192	LVRYFLDKTLTSRLG	P49189	30	ADASGTEKAFEPATG	Q86XP3	298	RDMIGIAKTGSGKTA
O14874	233	SPKKIIEKWVDFARR	P49189	303	VQKEILDKFTEEVVK	Q86XP3	347	QQIHAECKRFGKAYN
O14874	245	ARRLCEHKYGNAPRV	P49189	310	KFTEEVVKQTQRIKI	Q86XP3	351	AECKRFGKAYNLRSV
O14874	89	QDGSHLLKSARYLQQ	P49189	344	ERVLGFVKVAKEQGA	Q86XP3	5	***MNWNKGGPGTKR
O14879	249	DVLRSAAKFYRRKGD	P49189	352	VAKEQGAKVLCGGDI	Q86XP3	50	SSSSGFGKSAPPQLP
O14879	369	QRYCNLQKYNGKSED	P49189	366	IYVPEDPKLKDGYYM	Q86XP3	519	EELANNLKQEGHNLG
O14879	373	NLQKYNGKSEDTAVQ	P49189	49	TFTCSGEKEVNLAVQ	Q86XP3	545	NKVISDFKKKDIPVL
O14880	111	YYTGEPSKRSRGALG	P49189	59	NLAVQNAKAAFKIWS	Q86XP3	686	MSNYEAYKPSTGAMG
O14880	149	SGLGSGPKCCH****	P49189	63	QNAKAAFKIWSQKSG	Q86XP3	700	GDRLTAMKAAFQSQY
O14880	37	SKARKKYKVEYPIMY	P49189	68	AFKIWSQKSGMERCR	Q86XP3	918	KVDSKTDKTADGFAV
O14893	145	SEDEEGWKKFCLGEK	P49207	101	AFLIEEQKIVVKVLK	Q86XR7	35	GYHESDSKKSEDLSL
O14904	246	VGKHLKHKYETALKV	P49207	105	EEQKIVVKVLKAQAQ	Q86XR7	36	YHESDSKKSEDLSLC
O14920	147	RIIHRDLKPENIVLQ	P49207	108	KIVVKVLKAQAQSQK	Q86XR8	394	ESPTVELKDKLECEL
O14920	467	RNNSCLSKMKNSMAS	P49207	19	SYNTASNKTRLSRTP	Q86XR8	396	PTVELKDKLECELEA
O14920	603	QAIQSFEKKVRVIYT	P49207	36	RIVYLYTKKVGKAPK	Q86XZ4	336	VELRADIKHFVSERK
O14920	659	KELWNLLKIACSKVR	P49207	43	KKVGKAPKSACGVCP	Q86Y07	61	KDARHVVKVEYQENG
O14929	15	EKFLVEYKSAVEKKL	P49207	62	GVRAVRPKVLMRLSK	Q86Y07	75	GPLFSELKFYQRVAK
O14929	280	ITAEDPSKSYVKLRD	P49207	85	YGGSMCAKCVRDRIK	Q86Y26	197	GPVATLSKPSLGDRS
O14929	364	RRLISPYKKKQRDLA	P49257	346	NRIHLEIKQLNRQLD	Q86Y26	525	GGAACLGKVSSSGKR
O14929	9	AGFGAMEKFLVEYKS	P49257	407	LRQVNEMKNSMSETV	Q86Y26	531	GKVSSSGKRAREVHG
O14929	94	FRVEYASKVDENFDC	P49257	49	PHRRFEYKYSFKGPH	Q86Y26	588	VERRGSGKVINQVSL
O14933	96	IISSENWKPCTKTCQ	P49321	154	VYDAMGEKEEAKKTE	Q86Y56	43	PGLEADSKPGRRRAL
O14936	711	KKKQYKDKYLAKHNA	P49321	180	EQDSEMEKGGREDMD	Q86Y56	445	KLILSTLKKTPSASG
O14949	33	AYPHVFTKGIPNVLR	P49321	231	EAEVTSGKPEQEVPD	Q86Y79	133	PLGRLALKLGGSARG
O14949	73	EFERSKRKNPAAYEN	P49321	33	APSTSADKVESLDVD	Q86Y91	795	LPGTSACKKKRVASS
O14950	150	YREAPIDKKGNFNYI	P49321	417	LEEKVRAKLVPSQEE	Q86YC2	480	PSSRTSQKLLSLTKV
O14950	151	REAPIDKKGNFNYIE	P49321	450	VAQGATEKSPEDKVQ	Q86YN6	245	QSPRLPAKEDKEPGE
O14950	51	NRDGFIDKEDLHDML	P49321	455	TEKSPEDKVQIAANE	Q86YN6	357	DVLCDVSKPYRLATP
O14964	192	CGQIFCGKCSSKYST	P49321	636	EGSSAEYKKEIEELK	Q86YN6	464	GRGLPWTKLGRKLES
O14964	207	IPKFGIEKEVRVCEP	P49321	643	KKEIEELKELLPEIR	Q86YN6	587	QSDPTFGKKSFEQTL
O14964	50	KYAVNSIKKKVNDKN	P49321	698	VSMIASRKPTDGASS	Q86YN6	630	DIKHSLGKEIALSLP
O14965	143	GRPLGKGKFGNVYLA	P49321	736	KDDAKKAKQEPEVNG	Q86YP4	204	TQNIPAGKPSLQTSS
O14965	258	RVIHRDIKPENLLLG	P49327	1065	DPATHRQKLYTLQDK	Q86YP4	233	GGQQASSKLGPQASS
O14965	389	WITANSSKPSNCQNK	P49327	1072	KLYTLQDKAQVADVV	Q86YP4	27	TEDDVESKKIKMERG
O14965	63	RVPLQAQKLVSSHKP	P49327	1116	QQVPILEKFCFTPHT	Q86YP4	432	TCRWREEKSGAIMCE
O14967	190	DKCGEDYKLHFIFRH	P49327	1239	VENMPSLKMKVVEVL	Q86YP4	487	GTAPAQAKAEPTAAP
O14972	131	MKRSLLAKDLTKTCE	P49327	1241	NMPSLKMKVVEVLAG	Q86YP4	550	HTFSPSPKLQNSASA
O14974	315	MDNNQSQKTFKNKET	P49327	1429	FRWVESLKGILADED	Q86YP4	576	ERTVSAGKGSATSNW
O14974	420	KFPTTATKISPKEEE	P49327	1444	SSRPVWLKAINCATS	Q86YQ8	198	GSFTICHKTEVVKNT
O14974	514	STSDIEEKENRDSSS	P49327	1523	HFLLEEDKPEEPTAH	Q86YQ8	358	VQDYDSDKMFPALGF
O14974	926	PYSSRLEKDDSTDFK	P49327	1582	DIMLATGKLSPDAIP	Q86YQ8	405	EAYYRSLKSVQLYGP
O14974	945	QILAENEKLKAQLHD	P49327	1591	SPDAIPGKWTSQDSL	Q86YT6	872	ECVVCSDKKAAVLFQ
O14974	984	RSLLEMEKRERRALE	P49327	1704	TTVGSAEKRAYLQAR	Q86YV5	1365	KRALMMMKFAEKAVD
O14975	291	ATLALRTKFSASQFW	P49327	1739	VLWHTGGKGVDLVLN	Q86YW0	147	SRECLLFKNECRKVY
O14976	1172	RAPSFAQKPKVSEND	P49327	1752	LNSLAEEKLQASVRC	Q86YW9	1262	WVGEHCLKEPERLCT
O14976	685	ATTVKFAKYDLDACD	P49327	1771	GRFLEIGKFDLSQNH	Q86YW9	15	SYEQRPLKRPRLGPP
O14976	90	IQEVCFMKKLSGHPN	P49327	1827	DGVVRPLKCTVFHGA	Q86YW9	683	RMSVNCEKLVKREKP
O14978	275	TQVGQGGKLWDPSVQ	P49327	1847	FRYMAQGKHIGKVVV	Q86YW9	91	NTFQDTGKKKPQVNA
O14978	629	QRIHTGEKPYTCHEC	P49327	1851	AQGKHIGKVVVQVLA	Q86Z02	22	SSAFCSAKKLKIEPS
O14979	137	EEFAEGSKINASKNQ	P49327	1878	KLMSAISKTFCPAHK	Q8IU81	314	ALASSGFKYLEYERR
O14979	149	KNQQDDGKMFIGGLS	P49327	1911	LIQRGVQKLVLTSRS	Q8IU81	73	SPGPPALKHPATKDL
O14979	161	GLSWDTSKKDLTEYL	P49327	1927	IRTGYQAKQVRRWRR	Q8IUD2	10	GSARSVGKVEPSSQS
O14979	180	EVVDCTIKTDPVTGR	P49327	1993	EFFQDVCKPKYSGTL	Q8IUD2	1003	HSNQTNHKPSPDQII
O14979	197	GFGFVLFKDAASVDK	P49327	1995	FQDVCKPKYSGTLNL	Q8IUD2	390	VIEMKDSKISSMERG
O14979	204	KDAASVDKVLELKEH	P49327	213	LSPEGTCKAFDTAGN	Q8IUD2	655	DNYKKDLKDLKEKVS
O14979	209	VDKVLELKEHKLDGK	P49327	2186	VRQLTLRKLQELSSK	Q8IUD2	658	KKDLKDLKEKVSLLQ
O14979	216	KEHKLDGKLIDPKRA	P49327	2193	KLQELSSKADEASEL	Q8IUD2	706	LEIALEQKKEECLKM
O14979	288	YTDEEPVKKLLESRY	P49327	2206	ELACPTPKEDGLAQQ	Q8IUF8	12	AKPTGSGKEEGPAPC
O14979	302	YHQIGSGKCEIKVAQ	P49327	235	VVAVLLTKKSLARRV	Q8IUF8	20	EEGPAPCKQMKLEAA
O14979	306	GSGKCEIKVAQPKEV	P49327	2354	YTQSYRAKLTPGCEA	Q8IUF8	356	ELSTPGGKLPRLDSV
O14979	311	EIKVAQPKEVYRQQQ	P49327	2391	LEALLPLKGLEERVA	Q8IUF8	87	LFKLTDLKSLCSRGM
O14979	76	LAGGAAIKGGRRRRP	P49327	2406	AAVDLIIKSHQGLDR	Q8IUH3	153	IEYCSIIKNKVTGES
O14980	1012	NQDIPAFKEHLRDFL	P49327	2426	AARSFYYKLRAAEQY	Q8IUH3	97	CLGPNDTKPIKVFIA
O14980	103	RNQCEGIKKYVVGLI	P49327	2436	AAEQYTPKAKYHGNV	Q8IUI8	68	DLKGTLGKLLDERLV
O14980	122	SDPTCVEKEKVYIGK	P49327	2438	EQYTPKAKYHGNVML	Q8IUR6	175	LPSSFPGKKITSRAA
O14980	124	PTCVEKEKVYIGKLN	P49327	2449	NVMLLRAKTGGAYGE	Q8IUX4	352	YNDDEPFKPWKGLKY
O14980	144	ILKQEWPKHWPTFIS	P49327	2471	LSQVCDGKVSVHVIE	Q8IUX7	598	GKSSRGLKIYAMEIS
O14980	339	EHDQLIEKRLNLRET	P49327	257	GTNTDGFKEQGVTFP	Q8IUX8	332	GGNSHGGKKGNEEKM
O14980	415	LYLPMLFKVRLLMVS	P49327	298	EAHGTGTKVGDPQEL	Q8IUX8	333	GNSHGGKKGNEEKMK
O14980	446	EVVREFMKDTDSINL	P49327	41	TDDDRRWKAGLYGLP	Q8IUX8	338	GKKGNEEKMKEGLED
O14980	455	TDSINLYKNMRETLV	P49327	436	RTPEAVQKLLEQGLR	Q8IUZ5	33	FFPEDPVKIVRAQGQ
O14980	479	TERIMTEKLHNQVNG	P49327	528	LRSDEAVKPFGLKVS	Q8IV01	316	NLIWTNDKTTADPFV
O14980	514	AMHEEDEKRFLVTVI	P49327	611	YWRGQCIKEAHLPPG	Q8IV01	336	QDGRKMSKKKTAVKR
O14980	531	LLGLCEQKRGKDNKA	P49327	631	GLSWEECKQRCPPGV	Q8IV01	337	DGRKMSKKKTAVKRD
O14980	534	LCEQKRGKDNKAIIA	P49327	646	VPACHNSKDTVTISG	Q8IV32	85	ANPPSQTKLQARAPN
O14980	537	QKRGKDNKAIIASNI	P49327	673	RKEGVFAKEVRTGGM	Q8IV48	249	QCQLSRLKYPPFAKK
O14980	54	QEVLTHLKEHPDAWT	P49327	70	SFFGVHPKQAHTMDP	Q8IV48	52	GQETKGSKFITSSAS
O14980	560	RFLRAHWKFLKTVVN	P49327	772	ALLQAVLKRGLKPSC	Q8IV50	110	TNDCIFLKKTLNIPV
O14980	563	RAHWKFLKTVVNKLF	P49327	776	AVLKRGLKPSCTIIP	Q8IV50	195	KLSTQAAKKLKEESR
O14980	568	FLKTVVNKLFEFMHE	P49327	786	CTIIPLMKKDHRDNL	Q8IV63	161	TGTVLTDKSGRQWKL
O14980	680	TKNVDILKDPETVKQ	P49327	992	LAQAEVYKELRLRGY	Q8IV63	275	SALDVSPKHVLSERS
O14980	686	LKDPETVKQLGSILK	P49336	295	YTNCSLIKYMEKHKV	Q8IVF2	1319	GDLSLADKDVTAKDS
O14980	693	KQLGSILKTNVRACK	P49336	367	TEEEPDDKGDKKNQQ	Q8IVF2	1345	FGVSAPGKSIEASVD
O14980	700	KTNVRACKAVGHPFV	P49368	138	DDMISTLKKISIPVD	Q8IVF2	1814	GDLSLADKDVTAKDS
O14980	757	TVKRETLKLISGWVS	P49368	15	LVLSQNTKRESGRKV	Q8IVF2	2969	GDLSLADKDVTAKDS
O14981	217	NKAKRMAKLFAKQRS	P49368	203	KKYARVEKIPGGIIE	Q8IVF2	3134	GDLSLADKDVTAKDS
O14983	120	ENAIEALKEYEPEMG	P49368	21	TKRESGRKVQSGNIN	Q8IVF2	3299	GDLSLADKDVTAKDS
O14983	436	EAKGVYEKVGEATET	P49368	222	LRGVMINKDVTHPRM	Q8IVF2	3629	GDLSLADKDVTAKDS
O14983	481	VIRQLMKKEFTLEFS	P49368	234	PRMRRYIKNPRIVLL	Q8IVF2	3794	GDLSLADKDVTAKDS
O14983	515	VGNKMFVKGAPEGVI	P49368	248	LDSSLEYKKGESQTD	Q8IVF2	3820	FGVSAPGKSIEASVH
O14983	758	RAIYNNMKQFIRYLI	P49368	31	SGNINAAKTIADIIR	Q8IVF2	4124	GDLSLADKDVTAKDS
O15014	118	PSEGAASKKEVQGRS	P49368	353	GAGLLEIKKIGDEYF	Q8IVF2	4454	GDLSLADKDVTAKDS
O15014	181	GVGTCSEKDPGVLQP	P49368	367	FTFITDCKDPKACTI	Q8IVF2	989	GDLSLADKDVTAKDS
O15014	651	KPEKIPSKSLKSARP	P49368	370	ITDCKDPKACTILLR	Q8IVH2	165	LTQQQAGKPQPKEAL
O15014	749	ESPLTPGKVCRAEEG	P49368	381	ILLRGASKEILSEVE	Q8IVH2	175	PKEALGNKQLAFQQQ
O15014	794	SIKAEADKIYSFTDN	P49368	44	IRTCLGPKSMMKMLL	Q8IVH4	341	GISEMWDKMKDFQDL
O15014	84	PVPGPQGKEGKSKSK	P49368	469	LLTSLRAKHTQENCE	Q8IVH4	395	QIPLLEQKVLIGALS
O15020	121	HCLENVDKALQFLKE	P49368	527	DDIVSGHKKKGDDQS	Q8IVH4	88	KEQRFVDKLYTGLIQ
O15020	1674	IRQAQVDKLYAGLKE	P49368	78	QVQHPAAKSMIEISR	Q8IVL1	1917	ELRDKEMKLTDIRLE
O15020	173	SVETEDNKEKKSAKD	P49406	178	VQEIQVVKLEKRLDD	Q8IVM0	60	QHDLQVAKQLQEEDL
O15020	2074	ERFCALEKLTALEER	P49406	221	KVPVNELKVKMKPKP	Q8IVM0	78	AQLQKRYKDLEQQDC
O15020	217	AFNAIVHKHRPDLLD	P49406	277	MREYDTSKIEAAIWK	Q8IVS2	325	QQLVSPVKWEQTMHA
O15020	2259	RGSLGFYKDAKAASA	P49407	157	CAENLEEKIHKRNSV	Q8IVT2	208	LSLEQANKGAPHSSP
O15020	229	LLDFESLKKCNAHYN	P49411	234	RDPELGLKSVQKLLD	Q8IVT2	236	QAPKAFNKPHLANGH
O15020	602	LRFCNPGKEYRPCDP	P49411	238	LGLKSVQKLLDAVDT	Q8IVT2	248	NGHVVPIKPQVKGVV
O15020	65	VQKKTFTKWVNSHLA	P49411	256	VPARDLEKPFLLPVE	Q8IVT2	333	PTRPLLTKLSLITAP
O15027	1919	RPGQAAKKETKEPKK	P49411	297	CELLGHSKNIRTVVT	Q8IVT2	476	HLSESSGKPLSTKQE
O15027	1925	KKETKEPKKGESWFF	P49411	311	TGIEMFHKSLERAEA	Q8IW35	50	LDKNQIIKLENLEKC
O15027	1926	KETKEPKKGESWFFR	P49411	342	RRGLVMVKPGSIKPH	Q8IW35	552	SVALGQDKVALQKLN
O15027	1940	RWLPGKKKTEAYLPD	P49411	347	MVKPGSIKPHQKVEA	Q8IW35	564	KLNDAATKLQACWRG
O15027	1949	EAYLPDDKNKSIVWD	P49411	361	AQVYILSKEEGGRHK	Q8IW45	140	NAVHEVEKWLPRLHA
O15027	444	KSHLVGVKPFEADRA	P49411	395	RIILPPEKELAMPGE	Q8IWA0	123	FVIVNKEKPDIFQLV
O15027	868	RFYQQVTKDAQGQPG	P49411	418	RQPMILEKGQRFTLR	Q8IWA0	203	SRNKKHAKNNFTCVA
O15042	105	KKEQEELKKKEDEKA	P49411	447	LAMTEEEKNIKWG**	Q8IWA0	226	ASGHMDGKIRLWRNF
O15042	145	GGVVNAAKEEHETDE	P49411	55	KKTYVRDKPHVNVGT	Q8IWA0	283	RDATEKNKEFLPRLG
O15042	153	EEHETDEKRGKIYKP	P49411	79	TLTAAITKILAEGGG	Q8IWA0	313	CTSHSDNKIIIIHRN
O15042	168	SSRFADQKNPPNQSS	P49411	88	LAEGGGAKFKKYEEI	Q8IWA0	332	AVIQGLVKDRSIFTG
O15042	4	****MADKTPGGSQK	P49411	90	EGGGAKFKKYEEIDN	Q8IWA0	411	TVEQRQEKETELELQ
O15042	405	MLPPPKNKEDFEKTL	P49411	91	GGGAKFKKYEEIDNA	Q8IWA0	426	MKLWMYNKKTQGFIL
O15042	418	TLSQAIVKVVIPTER	P49418	15	IFAKNVQKRLNRAQE	Q8IWA0	455	LCFCNAEKSEQPTLV
O15042	476	AHVYYRWKLYSILQG	P49418	5	***MADIKTGIFAKN	Q8IWA0	466	PTLVTASKDGYFKVW
O15042	488	LQGDSPTKWRTEDFR	P49419	100	KKAREAWKIWADIPA	Q8IWA0	483	TDDSDIYKKAVGWTC
O15042	541	LKEEQRDKLEEILRG	P49419	439	ILYVFKFKNEEEVFA	Q8IWA0	628	QKGISREKVQWGVFV
O15042	647	HLQSENFKQRVMTCF	P49419	500	GGAFGGEKHTGGGRE	Q8IWA0	671	SLLTFSTKSPEEKLT
O15042	748	LDATEDSKKNEPIFK	P49419	528	TCTINYSKDLPLAQG	Q8IWA0	676	STKSPEEKLTPTSKQ
O15042	749	DATEDSKKNEPIFKV	P49419	93	ADYEETVKKAREAWK	Q8IWA0	810	DIIHQLSKSEEKELR
O15042	755	KKNEPIFKVAPSKWE	P49448	191	AGVKINPKNYTENEL	Q8IWB7	352	DSCYDSIKDEDRTSL
O15042	760	IFKVAPSKWEAVDES	P49448	84	GASIVEDKLVKDLRT	Q8IWC1	55	SNIRSTFKPVIDGSM
O15042	80	SRPLLENKLKAFSIG	P49454	1075	KNELEQLKEAFAKEH	Q8IWC1	601	MNAEAATKILTELRR
O15042	832	MTESKFSKYSEMSEE	P49454	108	EGQLNSGKKQIEKLE	Q8IWC1	833	VVSRPSSKRMTSHTT
O15042	840	YSEMSEEKRAKLREI	P49454	1163	LMKVMKTKHECQNLE	Q8IWG1	4	****MAPKQKKKTSR
O15042	850	KLREIELKVMKFQDE	P49454	1191	ERNQCNFKPQMDLEV	Q8IWI9	1201	LSPTVKGKLLTGIKS
O15042	866	ESGKRPKKPGQSFQE	P49454	1299	SLQTTMNKLNELEKI	Q8IWI9	1207	GKLLTGIKSPRSYTP
O15042	88	LKAFSIGKMSTAKRT	P49454	1341	KMAEEVGKLLNEVKI	Q8IWI9	1461	AGLSPAGKLVAYKRK
O15042	881	QVEHYRDKLLQREKE	P49454	1635	QEENLTRKETPSAPA	Q8IWI9	2339	AAHTQSFKQPSCTHI
O15042	902	RERDKKDKEKLESRS	P49454	1643	ETPSAPAKGVEELES	Q8IWI9	2367	PPIPLKLKPDYWSDK
O15042	910	EKLESRSKDKKEKDE	P49454	1675	SQGIMKNKEIQELEQ	Q8IWI9	2659	EDNSLEDKGRISSRG
O15042	912	LESRSKDKKEKDECT	P49454	1792	DVHQICDKDAQQDLN	Q8IWI9	2903	KDSLLSNKKAIDGGK
O15042	98	TAKRTLSKKEQEELK	P49454	1972	DLEMHADKSSREDIG	Q8IWI9	2910	KKAIDGGKNTSGLPA
O15047	1656	CTPNCYAKVITIESQ	P49454	2068	GELDTMSKKTTALDQ	Q8IWI9	2956	KLAPLGLKVANPSSD
O15047	203	GGKALSEKFQGSGAA	P49454	2870	LEELKKTKMDNLKYV	Q8IWI9	2970	DADGQSLKVMPCLAP
O15047	297	STTSTSFKPRRSENS	P49454	2875	KTKMDNLKYVNQLKK	Q8IWI9	2981	CLAPIAAKVGSVGHK
O15050	1179	TKATSHYKPLDPNIH	P49454	2881	LKYVNQLKKENERAQ	Q8IWI9	2988	KVGSVGHKMNLTGND
O15050	1187	PLDPNIHKLQDLRDE	P49454	3015	PIPSVTEKRLSSGQN	Q8IWI9	3013	TLAPVVAKLGNSGAS
O15054	1072	PSASVPGKKAREEAP	P49454	3051	ATPESFSKKSKKAVM	Q8IWI9	598	LKIATAAKVVNANQN
O15056	1120	PPTGLMVKKSASDAS	P49454	3092	FADIPTGKTSPYILR	Q8IWI9	634	RPPKNTGKSLISTKN
O15061	925	AEPTVIEKEIKIPHE	P49454	3115	SPRLAAQKLALSPLS	Q8IWI9	798	KIKGWRGKFHSASAS
O15063	1054	KAAPKGFKAFPGKGE	P49454	3133	ENLAESSKPTAGGSR	Q8IWI9	826	RSAFCSDKLDEYLEN
O15063	1059	GFKAFPGKGERRPAY	P49454	565	LAVADLEKQRDCSQD	Q8IWI9	937	SHVILGDKVTKNSSG
O15066	30	EKAASYDKVVDVDVK	P49454	623	KTLFSCWKSENEKLL	Q8IWJ2	1227	KIKQLLVKTKKELAD
O15066	410	GEEEGDDKDDYWREQ	P49454	823	LEADQSPKNSAILQN	Q8IWJ2	1274	LAEITSEKHKIHEHL
O15066	473	KIKAMESKLLVGGKN	P49458	16	EFSRAAEKLYLADPM	Q8IWJ2	294	SEKNIQKKYECELEN
O15067	279	NSSAIQGKEVRFLRP	P49458	24	LYLADPMKARVVLKY	Q8IWJ2	403	EQGCVIEKLKSELAG
O15067	507	RACVEAPKGNPICSL	P49458	30	MKARVVLKYRHSDGN	Q8IWJ2	952	SVKELEEKIENLEKE
O15067	900	SITQGLLKDRLLCSG	P49458	41	SDGNLCVKVTDDLVC	Q8IWJ2	958	EKIENLEKECKEKEE
O15078	1828	DLNNELQKKQKAYNK	P49458	52	DLVCLVYKTDQAQDV	Q8IWJ2	971	EEKINKIKLVAVKAK
O15078	1840	YNKILREKEEIDQEN	P49458	60	TDQAQDVKKIEKFHS	Q8IWR0	425	FFGSAVTKPSSSVTP
O15078	2437	NYKEEVKKNILLEEK	P49458	61	DQAQDVKKIEKFHSQ	Q8IWR0	782	CNHIASGKKCQYVGN
O15083	879	LLELSASKKKKTQEE	P49458	64	QDVKKIEKFHSQLMR	Q8IWR0	870	GKNCNSEKQWQGHIS
O15084	171	ANINAFDKKDRRAIH	P49458	76	LMRLMVAKEARNVTM	Q8IWR0	962	PNDNDFGKYSFLFKD
O15084	73	RVNAKDSKWLTPLHR	P49459	66	FTEEYPNKPPTVRFV	Q8IWR1	182	EKMIQGDKEAVLQYF
O15091	512	KACLPDAKTQRLFFK	P49585	228	LQRGYTAKELNVSFI	Q8IWR1	298	RTEIGQIKNVLIPKM
O15105	64	RAGCCLGKAVRGAKG	P49585	33	EEDGVPSKVQRCAVG	Q8IWR1	304	IKNVLIPKMKISPKR
O15105	70	GKAVRGAKGHHHPHP	P49585	57	EIEVDFSKPYVRVTM	Q8IWR1	306	NVLIPKMKISPKRMS
O15111	569	QRAIDLYKQLKHRPS	P49585	8	MDAQCSAKVNARKRR	Q8IWS0	118	DKAQIREKPSQGIYM
O15111	645	TVMFMQGKRQKEIWH	P49588	19	QRFIDFFKRNEHTYV	Q8IWS0	173	RPRKTNFKGLSEDTR
O15117	111	EAKVGFLKPVGPKPI	P49588	231	READGILKPLPKKSI	Q8IWS0	21	QRKCGFCKSNRDKEC
O15117	149	VNQDHDLKPLGPKSG	P49588	338	AVRYAHEKLNASRGF	Q8IWS0	227	EENEARGKLHIFNAK
O15117	179	KLTGVKGKFMSASQD	P49588	366	DAFPELKKDPDMVKD	Q8IWS0	234	KLHIFNAKKAAAHYK
O15117	265	PFPGVVLKPAASRGG	P49588	384	EEEVQFLKTLSRGRR	Q8IWS0	26	FCKSNRDKECGQLLI
O15117	282	LSKNGEEKKEDRKID	P49588	558	VDDSSEDKTEFTVKN	Q8IWS0	273	KTVLQEIKRGKRMKC
O15117	3	*****MAKYNTGGNP	P49588	625	VLGEADQKGSLVAPD	Q8IWS0	295	ATIGCEIKACVKTYH
O15117	319	RFPKAPSKLTVGGPW	P49588	677	DCPLAAAKAIQGLRA	Q8IWS0	299	CEIKACVKTYHYHCG
O15117	425	SLPPRNIKPPFDLKS	P49588	762	VTGAEAQKALRKAES	Q8IWS0	310	YHCGVQDKAKYIENM
O15117	505	QEIKKKFKLTGPIQV	P49588	780	CLSVMEAKVKAQTAP	Q8IWS0	312	CGVQDKAKYIENMSR
O15117	549	ITDNPEGKWLGRTAR	P49588	789	KAQTAPNKDVQREIA	Q8IWS0	323	NMSRGIYKLYCKNHS
O15117	700	KDFRKKFKYDGEIRV	P49588	876	KALNEALKLFKMHSP	Q8IWS0	349	RESKSRGKVEIDQQQ
O15117	720	VTTSITSKKWGTRDL	P49588	879	NEALKLFKMHSPQTS	Q8IWS0	79	KEIKRGTKLMCSLCH
O15119	407	SEEPCRDKGSPAVKA	P49588	930	VSGLMDGKGGGKDVS	Q8IWS0	97	ATIGCDVKTCHRTYH
O15119	466	REGTAPAKVEEARAL	P49588	934	MDGKGGGKDVSAQAT	Q8IWT1	92	KNEKSDPKVTLKDDD
O15119	714	SPKLCAEKEAATSEL	P49589	148	NETTDPDKKQMLERI	Q8IWU9	79	NEVGGLVKALRLFQE
O15119	734	LVSGLEAKPDRSRSA	P49589	217	SIFSKLPKFWEGDFH	Q8IWV7	1014	NDEITHDKEKAERKR
O15143	110	RWAPNENKFAVGSGS	P49589	280	AKFASSEKHSYGKLV	Q8IWX8	177	KDAISAGKNWMFSNA
O15143	174	RIFSAYIKEVEERPA	P49589	412	CKMSKSLKNFITIKD	Q8IWX8	18	ELRNVIDKLAQFVAR
O15143	18	ISCHAWNKDRTQIAI	P49589	48	VFIPQDGKKVTWYCC	Q8IWX8	256	FLAVEEDKQQKIARL
O15143	233	VCLADADKKMAVATL	P49589	503	DKKTAIHKALCDNVD	Q8IWX8	259	VEEDKQQKIARLLQL
O15143	307	ERFQNLDKKASSEGG	P49589	733	KLFEAQEKLYKEYLQ	Q8IWX8	667	KLEDHEYKPLDPKDI
O15143	326	AGLDSLHKNSVSQIS	P49590	144	ARYLAMNKVKKMKRY	Q8IWX8	863	GSGGLGAKEQGIQDP
O15143	367	KSLESALKDLKIK**	P49590	241	AICSSIDKLDKMAWK	Q8IWX8	872	QGIQDPIKGGDVRDK
O15143	37	HEVHIYEKSGAKWTK	P49590	257	VRHEMVVKKGLAPEV	Q8IWX8	879	KGGDVRDKWDQYKGV
O15143	41	IYEKSGAKWTKVHEL	P49590	444	IKAEMLYKNNPKLLT	Q8IWX8	901	YENYRRNKSYSFIAR
O15143	44	KSGAKWTKVHELKEH	P49590	52	QLKAHQEKPNFIIKT	Q8IWY8	180	RSGLPFPKSGVVSRL
O15143	82	NAYVWTLKGRTWKPT	P49591	12	LDLFRVDKGGDPALI	Q8IWZ6	371	QQSSQSSKAKSAVPS
O15144	117	VHQAGMLKRNCFASV	P49591	123	KCDAERIKLEAERFE	Q8IWZ8	123	TPTPSAGKRSLLISR
O15144	186	KVFMQEFKEGRRASH	P49591	154	NDEDVDNKVERIWGD	Q8IWZ8	144	ASLPGPVKSYSHAKQ
O15144	256	DYLHYHIKCSKAYIH	P49591	266	DDNSYDEKYLIATSE	Q8IWZ8	264	PPEDEEVKNLAEKLA
O15144	275	AKTSDFLKVLNRARP	P49591	323	FRVHQFEKIEQFVYS	Q8IWZ8	27	VAPPKSGKMNMNILH
O15144	290	DAEKKEMKTITGKTF	P49591	55	FRADNLNKLKNLCSK	Q8IWZ8	95	SFLQQFLKLQKAQTS
O15144	295	EMKTITGKTFSSR**	P49591	62	KLKNLCSKTIGEKMK	Q8IX01	1035	HGLGSLGKGIREPVS
O15144	65	SISLKFYKELQAHGA	P49641	373	ICCQFDFKRLPGGRI	Q8IX01	186	IEKECLEKESRDYDV
O15144	77	HGADELLKRVYGSFL	P49643	474	QPETPQPKPSVQKTK	Q8IX01	228	QEGSLLGKGETQGLL
O15145	147	TGLRLCEKVFDPQND	P49711	18	EESETFIKGKERKTY	Q8IX01	238	TQGLLTAKGGVGKLV
O15145	155	VFDPQNDKPSKWWTC	P49711	219	LRYTEEGKDVDVSVY	Q8IX01	243	TAKGGVGKLVTLRNV
O15145	158	PQNDKPSKWWTCFVK	P49711	349	RYKHTHEKPFKCSMC	Q8IX01	342	WAGFHTIKDDIKFSQ
O15145	165	KWWTCFVKRQFMNKS	P49711	436	KHTENVAKFHCPHCD	Q8IX01	545	SGCPLQVKKAEPEPM
O15145	171	VKRQFMNKSLSGPGQ	P49711	521	KRTHTGEKPYACSHC	Q8IX01	546	GCPLQVKKAEPEPMR
O15145	29	LPIRSQFKGPAPRET	P49711	559	PAAFVCSKCGKTFTR	Q8IX01	605	IEGSLSPKERTLLKE
O15145	37	GPAPRETKDTDIVDE	P49711	592	GENGGETKKSKRGRK	Q8IX01	724	APGLSQAKPSLPDRN
O15145	50	DEAIYYFKANVFFKN	P49715	161	ALRPLVIKQEPREED	Q8IX03	347	RLILINEKEELLKEM
O15145	56	FKANVFFKNYEIKNE	P49720	15	GGAVMAMKGKNCVAI	Q8IX12	1067	EKTDEDEKTILNLEN
O15145	61	FFKNYEIKNEADRTL	P49720	41	MVTTDFQKIFPMGDR	Q8IX12	1130	DEIHTVLKKDNVKNE
O15156	450	DHLQRHLKGQNCLEV	P49720	77	RLNLYELKEGRQIKP	Q8IX12	146	QQQTQPQKQRVFTGV
O15160	167	NELYVNHKVYTRHMT	P49720	83	LKEGRQIKPYTLMSM	Q8IX12	199	YNPNMPFKWNAQRIQ
O15160	224	GIGKDHAKFSPVATA	P49721	169	KCLEELQKRFILNLP	Q8IX12	431	REVESLEKNMAILDP
O15160	270	EVQEVQGKKVARVAN	P49721	185	FSVRIIDKNGIHDLD	Q8IX12	463	SMEDLYHKSCALAED
O15164	240	LYCETCDKLTCRDCQ	P49721	29	ASNIVQMKDDHDKMF	Q8IX12	486	QHPARLVKFLVGMKG
O15164	801	QDNSSNGKSEWLDPS	P49721	34	QMKDDHDKMFKMSEK	Q8IX12	515	LDGPDPEKDPSVLIK
O15164	820	LHVGETRKEDDPNED	P49721	37	DDHDKMFKMSEKILL	Q8IX12	594	ETLSRGYKQQLVEKL
O15164	875	TFCRDLSKPEVEYDC	P49721	68	QKNVQLYKMRNGYEL	Q8IX12	738	VHPNWAAKSGKFDCS
O15164	891	APSHNSEKKKTEGLV	P49736	216	SHGHNVFKERISDMC	Q8IX18	142	RFDDCSSKETAIKYM
O15173	135	FDVTKGSKFYGPAGP	P49736	224	ERISDMCKENRESLV	Q8IX18	240	RLYPVREKFCNLIGP
O15173	162	LATFCLDKDALRDEY	P49736	326	LPQLSMVKYNCNKCN	Q8IX18	730	WTNKENVKQLKDGIS
O15173	193	WEMQFKEKYDYVGRL	P49736	384	RIQESPGKVAAGRLP	Q8IX90	10	PIRSFCGKLRSLAST
O15182	13	RSELVVDKTKRKKRR	P49736	447	LANHVAKKDNKVAVG	Q8IX90	389	LATPIAIKAVPPSKR
O15198	420	TIRMSFVKGWGAEYH	P49736	462	ELTDEDVKMITSLSK	Q8IX90	399	PPSKRFLKHGQNIRD
O15212	15	KLQGEVEKYQQLQKD	P49736	469	KMITSLSKDQQIGEK	Q8IXA5	204	WRHHCQGKDLTEWVD
O15212	21	EKYQQLQKDLSKSMS	P49736	534	TAKSQFLKYIEKVSS	Q8IXH7	384	SINKDELKSTSKAVE
O15212	25	QLQKDLSKSMSGRQK	P49736	538	QFLKYIEKVSSRAIF	Q8IXI1	509	AHCASVYKHHYMDGQ
O15212	66	LLGPVLVKQELGEAR	P49736	591	CLIDEFDKMNDQDRT	Q8IXI2	512	EYCARIFKQHFMDSR
O15212	7	*MAELIQKKLQGEVE	P49736	691	VRHHPSNKEEEGLAN	Q8IXI2	92	NNKHSIDKVTSRWIP
O15212	88	DYITAEIKRYESQLR	P49736	734	AKERVHPKLNQMDQD	Q8IXJ9	1302	SNVTGQGKKLFGSGN
O15213	111	VPVEVVQKFCRIDKS	P49736	742	LNQMDQDKVAKMYSD	Q8IXK0	653	GRVDFAYKFKRSKRF
O15213	533	VISLEQGKKEQIERL	P49736	745	MDQDKVAKMYSDLRK	Q8IXK0	667	FCSMACAKRYNVGCT
O15213	567	SSTASLVKRKRKVMD	P49736	863	DTIEVPEKDLVDKAR	Q8IXM2	132	EAGGPPIKKQKADVT
O15226	25	SYDLVLSKPSKGQKR	P49736	868	PEKDLVDKARQINIH	Q8IXM2	69	NHISCVIKERTVAQI
O15226	272	RATELAVKLLQKRIE	P49736	896	NKFSHDLKRKMILQQ	Q8IXM2	77	ERTVAQIKATVKRKV
O15226	394	LAEGYGTKKTSKHAA	P49748	103	EEQTQFLKELVEPVS	Q8IXQ3	17	VTFHVPWKRLLLCDF
O15226	407	AAADEALKILQKTQP	P49748	195	GILLFGTKAQKEKYL	Q8IXQ4	15	PALPPGFKARGTAED
O15226	50	PKKQAGSKFHARPRF	P49748	239	AVPSPCGKYYTLNGS	Q8IXS6	126	KSFKDFQKGFSSTDG
O15226	500	VGVKKTVKYEAAGEA	P49748	276	DPATGAVKEKITAFV	Q8IXT5	151	PRKTRPLKAENPYLF
O15226	509	EAAGEAVKTLKKTQP	P49748	278	ATGAVKEKITAFVVE	Q8IXT5	319	EQIRFLYKDENRTRY
O15226	642	QIHQIAQKYGLKSKS	P49748	331	GEVGSGFKVAMHILN	Q8IXT5	345	NTALSLHKTVLQYRP
O15226	68	HFVASSSKDERQEDP	P49748	372	NRTQFGEKIHNFGLI	Q8IXT5	895	FGRPEGGKFDFGKHN
O15228	606	QYLAAVRKFTSQLLD	P49748	382	NFGLIQEKLARMVML	Q8IXT5	916	GRFMPDPKINCGSGR
O15228	643	VRLGVVEKKKINNNC	P49748	480	ALQGCMDKGKELSGL	Q8IXW0	125	QKLIQELKEQKERAQ
O15228	644	RLGVVEKKKINNNCI	P49748	482	QGCMDKGKELSGLGS	Q8IXW5	363	QVCPEVGKRNLLKVL
O15228	669	LEEMLGCKTPIGKPA	P49748	635	QELYRNFKSISKALV	Q8IXZ2	460	STSLPGDKKSGTSPA
O15228	67	YKGITPCKPIDIKCS	P49748	639	RNFKSISKALVERGG	Q8IY18	17	TPSPQPSKRALPRDP
O15228	679	IGKPATAKL******	P49750	1457	GRDISTNKVEQIPYG	Q8IY18	216	HKYHCELKNLREKEK
O15231	230	EEDGPSEKSQDPPAL	P49750	1695	EKDPDSGKKVKKKVM	Q8IY18	286	RQEYEEVKLVRDRVK
O15231	591	ASEVSSGKPVSARYS	P49750	1720	TYRTSMFKTFKKTLD	Q8IY18	31	PSSEVPSKRKNSAPQ
O15231	93	IIRGVFTKPIDSSSQ	P49750	1787	RKLKEINKMADHWET	Q8IY18	362	LQQALIVKQNEELDR
O15235	129	KLTVVRGKYDCGHVQ	P49750	1849	LGYIPKSKWEMDTSE	Q8IY18	414	LRRIQDEKALCEGEI
O15254	212	THAVVFAKLCVPGDQ	P49750	1861	TSEAKLDKLDGLRTG	Q8IY18	455	LMNQKEDKLRQRFRD
O15254	291	GTYVSPFKDVRQRFG	P49750	1943	ESGHLAEKALNRTKY	Q8IY18	548	PKSSYADKAPSRSLN
O15260	139	AESRSEGKSMFAGVP	P49750	270	EPLESGAKNKSTEQQ	Q8IY18	618	QIYTAEEKYVVKTSF
O15265	107	EASKLPGKDGTELDE	P49750	317	KVHLPGHKKGPVVAK	Q8IY18	686	TSKHLEHKDNELRQK
O15265	117	TELDESFKEFGKNRE	P49750	324	KKGPVVAKDTPEPVK	Q8IY18	714	LEQKISSKLGSLKLM
O15265	220	SASSSSSKLLKSPKE	P49750	540	SQPITAVKDMPVRSG	Q8IY18	748	EINVQKAKLVTELTN
O15265	257	RIMTPSVKVEKIHPK	P49750	613	PAEGTKSKWGMIPRG	Q8IY21	440	TKVCFLEKKPSPIKD
O15265	438	GVIPSESKPFVASKP	P49750	646	GPQWKGPKPAFGQQH	Q8IY21	560	IIVTQTIKSKKDFSG
O15265	678	PQKLKSSKSLRPKES	P49750	668	AEPLSGNKEPLADTS	Q8IY37	1113	LRALVAEKADCHEAL
O15265	789	GSPAESIKRMSVMVN	P49750	680	DTSSNQQKNFKMQSA	Q8IY37	118	RLFYTTSKLGTGNRM
O15269	126	AAALASLKKYGVGTC	P49750	696	FSIAADVKDVKAAQS	Q8IY37	22	QAGPGPSKGPPEPPP
O15269	210	RSDIKLFKHNDMADL	P49750	755	QPVPLANKPVPAQST	Q8IY37	431	AKPPPVIKVESRQFP
O15269	434	TQARYLEKEEKCLPP	P49750	839	RMEDTRDKGLVNRGR	Q8IY37	54	NALVLPGKKKKKTKA
O15294	16	ADSTEPTKRMLSFQG	P49753	104	RASLRDEKGALFQAH	Q8IY37	840	RARVAQMKRTWAGQG
O15294	168	SDLGNLLKALGRLEE	P49754	761	ILLREGCKKILVADS	Q8IY63	302	SPAQPAGKVLDPRGP
O15294	385	QEALMHYKEAIRISP	P49755	127	QLVILDMKHGVEAKN	Q8IY67	91	LKYCFVDKYKGTAFV
O15294	488	DYDERMKKLVSIVAD	P49755	140	KNYEEIAKVEKLKPL	Q8IY81	14	VGKSRRDKFYHLAKE
O15294	534	HGNLCLDKINVLHKP	P49755	169	VNDFAYMKKREEEMR	Q8IY81	157	RGGSFITKVFRSRDY
O15294	991	GTDLEYLKKVRGKVW	P49755	87	AGHILYSKEDATKGK	Q8IY81	182	FRRVQATKPQASRHE
O15297	66	PGGEVSGKGPAVAAR	P49756	117	CGLVLSWKRVQGASG	Q8IY81	20	DKFYHLAKETGYRSR
O15305	149	IEFYELDKKENIRQK	P49756	125	RVQGASGKLQAFGFC	Q8IY81	205	QGFLAPDKVDSKFFD
O15305	210	TIYFFGDKTMPGGND	P49756	135	AFGFCEYKEPESTLR	Q8IY81	214	DSKFFDPKFAFKEVE
O15305	34	EMDDFLQKLRQKIKI	P49756	155	HDLQIGEKKLLVKVD	Q8IY81	218	FDPKFAFKEVEVQAK
O15305	80	LVAYKDGKLLCRQNI	P49756	160	GEKKLLVKVDAKTKA	Q8IY81	233	TVTELVTKKKPKAEG
O15318	131	KKAKDAGKGTPLTNT	P49756	201	EALDEETKRRDQMIK	Q8IY81	31	YRSRSAFKLIQLNRR
O15318	89	QDIERYSKRYMKVYK	P49756	273	AIEMEEDKRDLISRE	Q8IY81	357	GTTKQPSKEEEEEEE
O15320	321	KKLIHAAKLNASLKT	P49756	511	DDDRDDPKYYRGSAL	Q8IY81	384	AQEVAELKRKKKKLL
O15327	448	DSLKNSLKMLSEKTE	P49756	540	ERDRKREKEELEEIR	Q8IY81	44	RRFQFLQKARALLDL
O15347	12	DPKKPKGKMSAYAFF	P49756	671	PKIGLSLKLGASNSP	Q8IY81	502	LTEVQDDKEEEEEEN
O15347	125	ISIGDVAKKLGEMWN	P49756	685	PGQPNSVKRKKLPVD	Q8IY81	579	QTPPSCLKTEIMSPL
O15347	126	SIGDVAKKLGEMWNN	P49756	697	PVDSVFNKFEDEDSD	Q8IY81	659	VPIEDPAKHRILDPE
O15347	139	NNLNDSEKQPYITKA	P49756	722	LDYGEDDKNATKGTV	Q8IY81	678	GAVIASSKKAKRDLI
O15347	145	EKQPYITKAAKLKEK	P49756	739	EEKRKHIKSLIEKIP	Q8IY81	710	EWFVQEEKQHRIRQL
O15347	152	KAAKLKEKYEKDVAD	P49756	77	DHPGLKAKENDENCG	Q8IY81	793	YKKAGLGKEKRHVTY
O15347	155	KLKEKYEKDVADYKS	P49756	777	RIRPWINKKIIEYIG	Q8IY81	804	HVTYVVAKKGVGRKV
O15347	165	ADYKSKGKFDGAKGP	P49756	837	LIYETEAKKIGLVK*	Q8IY81	822	AGVRGHFKVVDSRMK
O15347	170	KGKFDGAKGPAKVAR	P49773	21	GGDTIFGKIIRKEIP	Q8IYA6	26	LQEYLAAKGKLKSQN
O15347	43	VNFAEFSKKCSERWK	P49773	30	IRKEIPAKIIFEDDR	Q8IYA6	288	HFIRTLSKVQSSKKP
O15347	59	MSGKEKSKFDEMAKA	P49773	7	*MADEIAKAQVARPG	Q8IYA6	35	KLKSQNTKPYLKSKN
O15350	321	ALNESSAKNGAASKR	P49773	82	GHLMIVGKKCAADLG	Q8IYA6	69	NHVVLPVKPKRSISI
O15350	327	AKNGAASKRAFKQSP	P49773	92	AADLGLNKGYRMVVN	Q8IYB3	140	QRQIEQEKLASMKKQ
O15350	331	AASKRAFKQSPPAVP	P49790	1079	KEEMPATKGGFSFGN	Q8IYB3	29	KKLLKQLKFAECLEK
O15355	128	PTEDEDEKEKVADED	P49790	1120	STSLVFGKKADNEEP	Q8IYB3	36	KFAECLEKKVDMSKV
O15355	166	RYGQNCHKGPPHSKS	P49790	1157	TFSFSMTKPSEKESE	Q8IYB3	49	KVNLEVIKPWITKRV
O15355	172	HKGPPHSKSGGGTGE	P49790	15	VGGGGGGKIRTRRCH	Q8IYB3	54	VIKPWITKRVTEILG
O15355	209	QENGPTAKAYTGFSS	P49790	194	FSSRASDKDITVSKN	Q8IYB3	787	WSPAVPVKKAKSPTP
O15355	247	SCSSASDKLPRVAKS	P49790	263	DSPFYPGKTTYGGAA	Q8IYB4	40	KGSRAADKAVAMVMK
O15355	383	RIKNAGGKVTMDGRV	P49790	27	RCHQGPIKPYQQGRQ	Q8IYB5	192	AKPLTAEKLQKKDQQ
O15355	406	AIGDHFYKRNKNLPP	P49790	371	VQRLMTPKPVSIATN	Q8IYB5	23	QHQLILSKLLREEDN
O15355	519	ELQPESGKRKLEEVL	P49790	384	TNRSVYFKPSLTPSG	Q8IYB5	31	LLREEDNKYCADCEA
O15355	539	EENGNSDKKKKAKRD	P49790	403	TNQRIDNKCSTGYEK	Q8IYB7	252	RAATGFLKLLADKNS
O15355	83	PDIIKDQKAYKEGKL	P49790	448	GVGGGGGKMRRERTR	Q8IYB8	220	KTYHAIQKYFSAKSG
O15371	275	VVQRVGSKLFFDKRD	P49790	460	RTRFVASKPLEEEEM	Q8IYB8	410	TKLAQAKKFNDPNDP
O15371	280	GSKLFFDKRDNSDFD	P49790	586	TVNSTNCKKTPPEDC	Q8IYB8	99	EVKKVLDKFYKRKEI
O15371	3	*****MAKFMTPVIQ	P49790	61	WLQRYFNKNEDVCSC	Q8IYD1	102	GAGYPQGKRMGRGAP
O15371	35	MPYQPFSKGDRLGKV	P49790	685	CIACQAAKLSPRDTA	Q8IYD1	383	KVGFSPKKDIHFMPC
O15371	350	FVEDDMDKNEIASVA	P49790	718	SGTGFGDKFKPVIGT	Q8IYD8	1352	NTLNSFSKIRKEILK
O15371	364	AYRYRRWKLGDDIDL	P49790	720	TGFGDKFKPVIGTWD	Q8IYD8	1780	RKFPVPQKDGSALED
O15371	41	SKGDRLGKVADWTGA	P49790	736	DTCLVQNKPEAIKCV	Q8IYH5	117	EPVSPVLKRIKRCLR
O15371	426	AVIATELKNNSYKLA	P49790	755	PKPGTCVKRALTLTV	Q8IYH5	161	DADFQGTKRACRCLI
O15371	431	ELKNNSYKLARWTCC	P49790	791	LGFGDKFKRPIGSWE	Q8IYH5	265	EDSYIDHKVPCTDSQ
O15371	505	CMKLEEGKYLILKDP	P49790	886	PGTKSGFKGFDTSSS	Q8IYH5	454	NGSEGVSKPPSEARL
O15371	510	EGKYLILKDPNKQVI	P49790	954	SEGFKFSKPIGDFKF	Q8IYH5	647	GRLCDDTKPETFNQL
O15371	53	TGATYQDKRYTNKYS	P49790	968	FGVSSESKPEEVKKD	Q8IYH5	701	QVASRVQKYFIKLTK
O15372	165	AQGSLSLKAYRLTPK	P49792	1003	SKTIEFGKTNFVQPM	Q8IYH5	725	PNLYIYSKKSSTSRR
O15372	172	KAYRLTPKLMEVCKE	P49792	1104	NTFNFGSKNVSGISF	Q8IYH5	738	RRQHPLNKHLFKPST
O15372	178	PKLMEVCKEKDFSPE	P49792	1139	FTFHGPGKSVFGTPT	Q8IYH5	799	YKELLQFKKLKKQKL
O15372	180	LMEVCKEKDFSPEAL	P49792	115	DVTDGRAKYWLERAA	Q8IYH5	822	FVQHVGFKCDNCGIE
O15372	220	VLMWELEKKSAVADK	P49792	1209	FRFDVESKEWKERGI	Q8IYH5	93	RGLSSSEKDNIERQA
O15372	227	KKSAVADKHELLSLA	P49792	1220	ERGIGNVKILRHKTS	Q8IYJ1	132	LTGVPGKKCGTILLT
O15372	24	STAGAAGKGKGKGGS	P49792	1286	EQLAIRFKTPEEAAL	Q8IYJ1	158	TMQLCANKLDKKDFF
O15372	274	TSKQQQQKHQYQQRR	P49792	1332	EPTSHDNKDICKSDA	Q8IYJ1	161	LCANKLDKKDFFGKS
O15372	28	AAGKGKGKGGSGDSA	P49792	1364	HCNSCSLKNASTAKK	Q8IYK2	239	DTLNFCFKERLQAVD
O15381	156	STPRISSKTGSIPLK	P49792	1415	FALVTPKKEGHWDCS	Q8IYK2	366	GTILRCTKYNQELYT
O15381	167	IPLKTPAKDSEGGWF	P49792	1458	FVHQASFKFGQGDLP	Q8IYL3	39	VAGSTSAKTACLTSS
O15381	177	EGGWFIDKTPSVKKD	P49792	1466	FGQGDLPKPINSDFR	Q8IYL3	63	SKKFKCDKGHLVKSE
O15381	275	GGNDMTLKEVCKMLI	P49792	1479	FRSVFSTKEGQWDCS	Q8IYM1	71	TMVNTLFKSKVWKSN
O15381	28	LTSNKCGKYVDIGVL	P49792	1522	IPTPASFKFGTSETS	Q8IYN0	318	HTGVKPYKCTECGKA
O15381	509	EMEDLPSKGVQEERL	P49792	1530	FGTSETSKTLKSGFE	Q8IYQ7	183	QNSGTSMKDLLKFRR
O15381	628	AGPPGCGKTLLAKAV	P49792	1543	FEDMFAKKEGQWDCS	Q8IYQ7	245	WPEDCEQKVSAKFFS
O15381	70	FSIISSEKELKNLTE	P49792	1571	VACQNPDKPSPSTSV	Q8IYQ7	281	KLSCGEWKSLVGATY
O15381	833	KHFEEAFKKVRSSIS	P49792	1605	GFEGMFTKKEGQWDC	Q8IYQ7	604	QHHFQIEKALVEKLQ
O15381	85	LEDEHLAKRARQGEE	P49792	1664	GFEGMFTKKEGQWDC	Q8IYS1	24	RSELELLKLRSAECI
O15382	141	LCLPSFDKLELLECI	P49792	1723	GFEGMFTKKEGQWDC	Q8IYT2	342	LNFGTEMKRKALFPH
O15382	229	VGGVGNYKLGGNYGP	P49792	1842	SQVGTGFKSNFSEKA	Q8IYT2	74	KNSLNEVKNLLSDKK
O15382	246	LVQQEALKRGCEQVL	P49792	1848	FKSNFSEKASKFGNT	Q8IYW5	560	LQPSISQKSVFQMFQ
O15382	321	VERTITMKQLLRALE	P49792	1851	NFSEKASKFGNTEQG	Q8IYX7	106	MDLLTTYKKDYNPYP
O15382	377	LRFQKELKEIQYGIR	P49792	1977	GFSGAGEKLFSSQYG	Q8IYX7	126	PIKPRDSKYPCSDKM
O15382	44	LQLEMTQKPHKKPGP	P49792	1985	LFSSQYGKMANKANT	Q8IYX7	132	SKYPCSDKMECLPTY
O15382	73	LMVEWNDKGWGQPRI	P49792	2053	DAEVSQWKERGLGNL	Q8IYX7	208	LEDVTNYKMSYVAHP
O15391	309	QLVHTGEKPFQCTFE	P49792	2125	KLEQLAAKFKTPELA	Q8IYX7	27	LPTKIYDKTEKPCLL
O15391	351	PFDVCNRKFAQSTNL	P49792	2279	KSALSPSKSPAKLNQ	Q8IYX7	30	KIYDKTEKPCLLSEY
O15392	110	KLDRERAKNKIAKET	P49792	2344	AKLYRYDKDVGQWKE	Q8IYX7	345	STTKDDYKQWSSMRT
O15392	112	DRERAKNKIAKETNN	P49792	2650	EQKALATKLKLPPTF	Q8IYX7	85	PHKVAPVKVHQYDQF
O15392	115	RAKNKIAKETNNKKK	P49792	2801	EEPDSITKSISSPSV	Q8IZ69	242	QQTEYRNKCEFLVGV
O15392	120	IAKETNNKKKEFEET	P49792	2815	VSSETMDKPVDLSTR	Q8IZ69	266	GCRLGKYKGGTCAVA
O15392	121	AKETNNKKKEFEETA	P49792	2966	KILWHTMKNYYRILM	Q8IZ73	304	VRDRQLEKEYVCRVE
O15392	122	KETNNKKKEFEETAK	P49792	2980	MRRDQVFKVCANHVI	Q8IZ83	114	RLAEVIQKHQRLLWT
O15392	129	KEFEETAKKVRRAIE	P49792	3034	KEVADCFKKTFEECQ	Q8IZ83	50	YVNGKWLKPEHRNSV
O15392	130	EFEETAKKVRRAIEQ	P49792	3046	ECQQNLMKLQKGHVS	Q8IZ83	618	ERQGAELKAAEAEVE
O15392	23	DHRISTFKNWPFLEG	P49792	3104	RALCTGEKGFGFKNS	Q8IZC4	208	ISKATGKKISSVLQE
O15392	78	DDPIEEHKKHSSGCA	P49792	3142	GQSIYGDKFEDENFD	Q8IZF0	1069	RINVSVSKNLNLKLR
O15392	90	GCAFLSVKKQFEELT	P49792	3185	KAEHLDFKHVVFGFV	Q8IZH2	1035	QEIITWLKGHPVSTL
O15403	220	IVIQENRKEAQYMLE	P49792	3209	IESFGSPKGSVCRRI	Q8IZH2	736	AVSDGETKFYLEEPP
O15405	257	KDPNEPQKPVSAYAL	P49792	521	CLPLPVCKQLCTERQ	Q8IZH2	765	KVVHLGDKEQSNWAK
O15417	1591	DALIGMGKARGRNQT	P49792	550	AVPGNVAKLRLLVQH	Q8IZH2	847	DSRFSNIKTLDDLFP
O15417	1893	SVVQLEAKQKARKKE	P49792	614	KKVLPLLKIIKKKNS	Q8IZJ4	340	TWAGVSSKSMKELKE
O15417	2086	ASSLTAAKRSKAKAK	P49792	983	PEPGYFTKPPIAAHA	Q8IZJ4	343	GVSSKSMKELKELCK
O15417	2301	ALLVPSAKRRSRKTS	P49792	997	ASRSAESKTIEFGKT	Q8IZL2	533	LDVLMQQKPQDLSRS
O15417	609	VRPGGCGKKSPFGGL	P49802	228	RNPHKTRKSVYGLQN	Q8IZL8	216	ACGSLKGKLASFFLS
O15417	620	FGGLGTMKPEPAPTS	P49802	251	HTPTPETKPPTEDEL	Q8IZL8	354	RTLSVSSKNISLHGD
O15427	448	REVEHFLKAEPEKNG	P49821	104	LKWSFMNKPSDGRPK	Q8IZL8	490	DGSLQTGKPSAPKKL
O15440	798	PVEINSKKETSGSQK	P49821	137	ILRHDPHKLLEGCLV	Q8IZL8	495	TGKPSAPKKLKLDVG
O15440	806	ETSGSQKKSQDKGPK	P49821	375	ARLIEFYKHESCGQC	Q8IZM8	369	SLPVSTSKSRKESTE
O15446	174	PNLLTSGKKKKEMQV	P49821	66	RGDWYKTKEILLKGP	Q8IZP0	199	LGRNTPYKTLEPVKP
O15446	288	DTVLSPTKKRKRQKG	P49821	81	DWILGEIKTSGLRGR	Q8IZQ5	20	AVVAVAEKREKLANG
O15446	70	LSGSQIVKGKLAGKR	P49841	15	TSFAESCKPVQQPSA	Q8IZS8	101	NMEEMFHKKSEAVRR
O15457	456	YYGSLEDKRFGIILE	P49848	238	CVGSCEAKRAEALQS	Q8IZS8	119	AAEEAHLKHEFDADL
O15479	256	TKDLVQEKYLEYKQV	P49848	287	IYLMRMVKALMDNPT	Q8IZT6	1912	QSAFRMAKAQKQFRL
O15498	103	KVLDEFSKQVDRIDW	P49848	342	RLVAQICKHFSTTTN	Q8IZT6	1915	FRMAKAQKQFRLFKT
O15498	15	VLYKGEAKVVLLKAA	P49848	367	TKSWVDEKTPWTTRY	Q8IZT6	1995	KKWKIMKKAALLIQK
O15498	166	SLLERGEKLDDLVSK	P49848	6	**MAEEKKLKLSNTV	Q8IZT6	2450	ATICAKHKLYQFLHL
O15498	182	EVLGTQSKAFYKTAR	P49848	647	GSALCGGKQEAGDSP	Q8IZT6	615	EPKTSAVKKTKNVTT
O15498	186	TQSKAFYKTARKQNS	P49848	8	MAEEKKLKLSNTVLP	Q8IZT6	616	PKTSAVKKTKNVTTP
O15511	3	*****MSKNTVSSAR	P49888	205	DIRKEVIKLIHFLER	Q8IZV5	268	EPFLPPLKPDYCVKQ
O15511	67	KNPPINTKSQAVKDR	P49902	140	TREQYPNKFIQRDDT	Q8IZV5	274	LKPDYCVKQAMKAIL
O15511	87	LKVLISFKANDIEKA	P49902	186	TSCETGFKDGDLFMS	Q8N0T1	21	VFHIASQKNFKAKNK
O15511	93	FKANDIEKAVQSLDK	P49902	211	AVDWVHYKGSLKEKT	Q8N0U4	121	GLDGLQVKYDEDLEE
O15514	94	LLQKKLHKFELACLA	P49902	254	LATNSDYKYTDKIMT	Q8N0U4	224	KSAVTIDKLQGSSVT
O15516	31	GLVEEDDKDKAKRVS	P49903	139	MTDRERDKVMPLIIQ	Q8N0U4	303	VYVSQLGKVELKSHK
O15516	41	AKRVSRNKSEKKRRD	P49903	27	LTRFTELKGTGCKVP	Q8N0U4	307	QLGKVELKSHKGSII
O15525	110	ELDALRSKYEALQTF	P49903	341	ARFCAEIKSPKYGEG	Q8N0U7	84	TDNPDDVKEKKHPEN
O15525	14	GNKALKVKREPGENG	P49914	150	GNRLGRGKGYYDAYL	Q8N0V4	174	NKFECDCKAKWLYLW
O15525	53	KEEIVQLKQRRRTLK	P49914	18	RSLRGELKQRLRAMS	Q8N0V4	176	FECDCKAKWLYLWLK
O15525	6	**MTTPNKGNKALKV	P49915	120	VFGGTVHKKSVREDG	Q8N0X4	57	YVPGNDEKKIKKIPS
O15525	60	KQRRRTLKNRGYAAS	P49915	145	SLFRGLQKEEVVLLT	Q8N0X7	22	IIREAYKKAFLFVNK
O15525	71	YAASCRVKRVTQKEE	P49915	159	THGDSVDKVADGFKV	Q8N0X7	29	KAFLFVNKGLNTDEL
O15525	76	RVKRVTQKEELEKQK	P49915	165	DKVADGFKVVARSGN	Q8N0X7	447	KGAEITGKAIQKGAS
O15525	9	TTPNKGNKALKVKRE	P49915	182	AGIANESKKLYGAQF	Q8N0X7	465	ERIQPEEKPVEVSPA
O15527	335	HAQEPPAKRRKGSKG	P49915	288	QSVEEALKKLGIQVK	Q8N0Z3	260	LNATNAVKRLQTRLQ
O15527	338	EPPAKRRKGSKGPEG	P49915	389	SGKAELIKTHHNDTE	Q8N0Z6	94	KAEELLSKAVKLEPE
O15527	341	AKRRKGSKGPEG***	P49915	412	GKVIEPLKDFHKDEV	Q8N103	499	TTKTEKGKPSREIKK
O15530	296	LIFQKIIKLEYDFPE	P49915	416	EPLKDFHKDEVRILG	Q8N163	162	IPPLFPQKPLSLFQT
O15530	304	LEYDFPEKFFPKARD	P49915	457	AEEPYICKDFPETNN	Q8N163	215	GGEPWGAKKPRHDLP
O15533	441	AVYLSTCKDSKKKAE	P49915	607	RESGYAGKISQMPVI	Q8N163	742	RLSAEQAKQLVSRVV
O15533	445	STCKDSKKKAE****	P49915	627	FDRDPLQKQPSCQRS	Q8N163	832	GRLYLENKIHTLELK
O15541	107	YKSTRSAKPVGPEDM	P49915	685	IMYDLTSKPPGTTEW	Q8N163	909	EIQRVVEKADSWVEK
O15541	161	RGINNYQKYMKPKDT	P49915	9	ALCNGDSKLENAGGD	Q8N163	916	KADSWVEKEEPAPSN
O15550	23	AAFGDEEKKMAAGKA	P49916	146	HIKCMFEKLERARAT	Q8N183	140	ASAPYFGKEEPSVAP
O15550	29	EKKMAAGKASGESEE	P49916	232	KFSGFSAKPNNSGEA	Q8N1D5	147	YGLYEQLKQRQLTPK
O15550	633	SSAEEPWKNQLSNST	P49916	316	LLLPGVIKTVYNLND	Q8N1F7	103	TDIQGFLKNEKDNAL
O15550	719	ITLTKESKPSGNILT	P49916	324	TVYNLNDKQIVKLFS	Q8N1F7	106	QGFLKNEKDNALLSA
O15550	799	VGTGTCDKVNNIHPA	P49916	328	LNDKQIVKLFSRIFN	Q8N1F7	349	QHQLGEFKTWFQEYM
O43143	132	PRYYDILKKRLQLPV	P49916	442	PNAYEAFKASRNLQD	Q8N1F7	370	LSPATENKLRLHYRR
O43143	143	QLPVWEYKDRFTDIL	P49916	463	HNAQEVEKEPGQRRA	Q8N1F7	387	RNNTDPYKRAVYCII
O43143	166	VGETGSGKTTQIPQW	P49916	508	NGMFSEIKYDGERVQ	Q8N1F7	558	FYFLRDEKDSQGENM
O43143	17	GEDYPSGKKRAGTDG	P49916	615	RPLCERRKFLHDNMV	Q8N1F7	586	EFDMILGKLENDGSR
O43143	185	MRSLPGPKRGVACTQ	P49916	638	SEMKRVTKALDLADM	Q8N1F7	594	LENDGSRKPGVIDKF
O43143	230	FEDCSSAKTILKYMT	P49916	663	GLVLKDVKGTYEPGK	Q8N1F7	600	RKPGVIDKFTSDTKP
O43143	234	SSAKTILKYMTDGML	P49916	728	QKWCTVTKCAGGHDD	Q8N1F7	606	DKFTSDTKPIINKVA
O43143	384	GPEVGDIKIIPLYST	P49916	890	KLSNSNSKDGNMQTA	Q8N1F7	619	VASVAENKGLFEEAA
O43143	445	DPGFAKQKVYNPRIR	P49916	898	DGNMQTAKPSAMKVG	Q8N1F7	633	AKLYDLAKNADKVLE
O43143	488	CFRLYTEKAYKTEMQ	P49916	903	TAKPSAMKVGEKLAT	Q8N1F7	718	FDIIERLKLVPLNQE
O43143	491	LYTEKAYKTEMQDNT	P49916	907	SAMKVGEKLATKSSP	Q8N1G0	114	AQAAGVTKEGPVGPH
O43143	614	KKAADEAKMRFAHID	P49916	911	VGEKLATKSSPVKVG	Q8N1G0	892	RLEETAGKGAGGALL
O43143	730	PSTVLDHKPEWVLYN	P49916	99	RFCVDYAKRGTAGCK	Q8N1G0	951	PRRELGSKGLKGGGG
O43143	754	IRTCTDIKPEWLVKI	P49959	384	SVLRFSQKFVDRVAN	Q8N1G1	491	STKAPSGKLVERKAR
O43143	760	IKPEWLVKIAPQYYD	P49959	416	GEEINFGKLITKPSE	Q8N1G1	718	APARLAEKSPSVHIS
O43143	777	NFPQCEAKRQLDRII	P49959	420	NFGKLITKPSEGTTL	Q8N1G1	749	AAAPTGAKRTLAASG
O43143	786	QLDRIIAKLQSKEYS	P49959	480	LVKYQLEKTQRFLKE	Q8N1G2	108	REGEGLGKYSQGRKD
O43147	590	YKFGMSKKEMEQVDA	P49959	609	STRSRNSKTAVSASR	Q8N1G2	123	IVEASSQKGRRGLGL
O43147	611	QQVLAEWKACEVVVR	P49959	625	MSIIDAFKSTRQQPS	Q8N1G2	14	PECTAPIKKQKKRVA
O43148	126	TGDGTQNKRKIALED	P49959	673	WSSTSSSKIMSQSQV	Q8N1G2	260	NPRDSYGKPLVKDRE
O43148	128	DGTQNKRKIALEDVP	P50135	112	TSNLENVKFAWHKET	Q8N1G2	584	LTSKTLEKIRPVFDY
O43148	137	ALEDVPEKQKNLEEG	P50148	102	DTLKIPYKYEHNKAH	Q8N1G2	685	QRIQLAEKFVKAVSK
O43148	208	VLDLGCGKGGDLLKW	P50213	100	MGLKGPLKTPIAAGH	Q8N1G2	93	MYNSVSQKLMAKMGF
O43148	222	WKKGRINKLVCTDIA	P50213	177	LITEGASKRIAEFAF	Q8N1G2	97	VSQKLMAKMGFREGE
O43148	433	SSKLVSEKVDDYEHA	P50213	200	SNVTAVHKANIMRMS	Q8N1G4	226	AELADCPKLKEINFR
O43148	442	DDYEHAAKYMKNSQV	P50213	214	SDGLFLQKCREVAES	Q8N1G4	228	LADCPKLKEINFRGN
O43148	6	**MANSAKAEEYEKM	P50213	223	REVAESCKDIKFNEM	Q8N1G4	244	LRDKRLEKMVSGCQT
O43148	75	KESSSCGKDTPSKKR	P50213	336	AACFATIKDGKSLTK	Q8N1G4	353	LQPGNALKRFLTSQT
O43148	93	PEIVPEEKDCGDAEG	P50213	343	KDGKSLTKDLGGNAK	Q8N1G4	361	RFLTSQTKLHEDLCE
O43149	2306	KDYQLVQKGGGQECG	P50213	350	KDLGGNAKCSDFTEE	Q8N1G4	369	LHEDLCEKRTAATLA
O43149	2667	EEKHEWEKILQKVLQ	P50213	58	MKIFDAAKAPIQWEE	Q8N1G4	569	LKVVYPSKADLATAP
O43150	242	LKAVESLKPSIETLS	P50213	77	AIQGPGGKWMIPSEA	Q8N1H7	160	LACTEQLKMNETIFM
O43151	1376	SGGRLRGKPWSPCKF	P50213	85	WMIPSEAKESMDKNK	Q8N1K5	339	FLIPTSYKGKFKRRP
O43151	352	RPEALPTKPKVKVEA	P50219	322	GGGGGAGKGGAEEPG	Q8N1K5	460	FRLPFNVKVSVRDLS
O43151	465	EKAAPGIKPSVRKPI	P50219	342	GPPAPGDKGSGRRLR	Q8N201	100	AEAAVAEKRAISPSI
O43151	684	SLLDTPAKRAQAEFP	P50225	106	TPAPRLLKTHLPLAL	Q8N201	17	RRPSAAAKPSGHPPP
O43159	131	SDSAEDEKRKRKCQK	P50238	22	ERVTSLGKDWHRPCL	Q8N201	361	LTSTCGYKEVRLLAV
O43159	138	KRKRKCQKHAPINSA	P50238	30	DWHRPCLKCEKCGKT	Q8N201	47	KTASTLLKPAPSGLP
O43159	201	NKRRCKNKFQPPQVP	P50238	49	GHAEHEGKPYCNHPC	Q8N201	76	SALTGLTKRPKLSST
O43159	409	TFLRAVTKLGFKIVS	P50238	64	YAAMFGPKGFGRGGA	Q8N257	12	SKSAPAPKKGSKKAV
O43159	413	AVTKLGFKIVSKDLT	P50238	9	PKCPKCNKEVYFAER	Q8N257	6	**MPDPSKSAPAPKK
O43159	417	LGFKIVSKDLTNSHF	P50395	112	TEGSFVYKGGKIYKV	Q8N2M8	553	ASPAVGEKLKKTEPA
O43159	78	RKKKCPKKASFASAS	P50395	137	SLMGLFEKRRFRKFL	Q8N2M8	577	PKLTPQEKLKLRMQK
O43159	90	SASAEVGKKGKKKCQ	P50395	142	FEKRRFRKFLVYVAN	Q8N2U0	43	YGKELFDKANKHHFL
O43164	46	RHAYVSFKPCMTRHE	P50395	153	YVANFDEKDPRTFEG	Q8N2W9	114	DYPVLYGKYLNGLGR
O43166	1482	PRQGATSKYLIGWKK	P50395	164	TFEGIDPKKTTMRDV	Q8N2W9	125	GLGRLPAKTLKPEVR
O43166	1488	SKYLIGWKKPEGTIN	P50395	253	GGTYMLNKPIEEIIV	Q8N2W9	504	KRRCPFQKGLVPAC*
O43167	280	QEDHGSAKRICGRRK	P50395	269	NGKVIGVKSEGEIAR	Q8N302	327	AKIGIHHKNSPPKVT
O43167	477	SFSDSSAKRRHCILH	P50395	288	ICDPSYVKDRVEKVG	Q8N302	357	ISNSTSFKDEKIMET
O43169	30	YRLEEVAKRNSLKEL	P50395	293	YVKDRVEKVGQVIRV	Q8N302	622	SEITDSNKGRKMLEK
O43169	35	VAKRNSLKELWLVIH	P50395	309	CILSHPIKNTNDANS	Q8N302	664	HAGLGTGKPSSFEDV
O43169	88	SDAREMLKQYYIGDI	P50395	364	VETKEPEKEIRPALE	Q8N302	679	HLLQNKNKKNWDKAR
O43172	109	STDDSEVKACLRALG	P50395	418	ETTCDDIKNIYKRMT	Q8N328	283	YFGRHGCKQFIRGKP
O43172	146	VVGTDALKKTKKDDE	P50395	435	EFDFEEMKRKKNDIY	Q8N328	406	FDYRIDGKGNIVCRW
O43172	15	STQATKTKAPDDLVA	P50395	54	TPLEDLYKRFKIPGS	Q8N393	436	KCGKGFAKQCKLTEH
O43172	159	DEKSKKSKEEYQQTW	P50402	79	DMYDLPKKEDALLYQ	Q8N3A8	372	RPCPAAVKSEECLTL
O43172	244	CHFSPNSKMLATACW	P50416	634	EQRLKLFKLASEKHQ	Q8N3A8	380	SEECLTLKSHRLLTR
O43172	27	LVAPVVKKPHIYYGS	P50440	381	ANEVPIQKMFEKLGI	Q8N3A8	405	NTNLKPHKLLSRSYS
O43172	284	GAIVFHPKSTVSLDP	P50440	385	PIQKMFEKLGITTIK	Q8N3C0	1399	WKVRIEEKLGKKVIE
O43172	292	STVSLDPKDVNLASC	P50454	160	HYNCEHSKINFRDKR	Q8N3C0	1709	VILVHDIKKDFYKKF
O43172	306	CAADGSVKLWSLDSD	P50454	190	GKLPEVTKDVERTDG	Q8N3C0	30	NEEVADLKIKRSKLH
O43172	38	YYGSLEEKERERLAK	P50454	207	LVNAMFFKPHWDEKF	Q8N3C0	572	TGDMQLSKSEILRTQ
O43172	432	GSGDNTCKVWDLRQR	P50454	217	WDEKFHHKMVDNRGF	Q8N3C0	860	AGRPQFDKFGEGIII
O43172	486	HPGWSPLKTLAGHEG	P50454	250	YNYYDDEKEKLQIVE	Q8N3F0	88	TLHEVLEKVFKSFRP
O43172	53	GESGILGKDGLKAGI	P50454	283	EPLERLEKLLTKEQL	Q8N3F8	289	TKPRVPGKLQELASP
O43175	136	KDGKWERKKFMGTEL	P50454	287	RLEKLLTKEQLKIWM	Q8N3J9	38	HKCDKCDKGFFHISE
O43175	137	DGKWERKKFMGTELN	P50454	319	EVTHDLQKHLAGLGL	Q8N3P4	540	GLSGDASKRKAIVAD
O43175	289	PHLGASTKEAQSRCG	P50454	332	GLTEAIDKNKADLSR	Q8N3P4	972	IEELVSLKPCKAAEL
O43175	33	GGLQVVEKQNLSKEE	P50502	14	NELRAFVKMCKQDPS	Q8N3U4	270	RLELLLQKRKELQEN
O43175	351	RAWAGSPKGTIQVIT	P50502	153	RLAILYAKRASVFVK	Q8N3U4	48	KTCKKGKKGPAEKGK
O43175	364	ITQGTSLKNAGNCLS	P50502	160	KRASVFVKLQKPNAA	Q8N3U4	53	GKKGPAEKGKGGNGG
O43175	380	AVIVGLLKEASKQAD	P50502	17	RAFVKMCKQDPSVLH	Q8N3U4	55	KGPAEKGKGGNGGGK
O43175	394	DVNLVNAKLLVKEAG	P50502	186	PDSAQPYKWRGKAHR	Q8N3U4	551	GKRVLTAKEKKTQLD
O43175	58	LIVRSATKVTADVIN	P50502	210	HDLALACKLDYDEDA	Q8N3U4	607	YTTGRLEKHLDALLR
O43175	69	DVINAAEKLQVVGRA	P50502	353	SKYQSNPKVMNLISK	Q8N3U4	62	KGGNGGGKPPSGPNR
O43175	8	MAFANLRKVLISDSL	P50502	360	KVMNLISKLSAKFGG	Q8N3U4	622	QIRNIVEKHTDTDVL
O43242	14	ARRRGADKAKPPPGG	P50542	28	AGHFTQDKALRQEGL	Q8N3U4	664	LIDELADKFNRLLED
O43242	16	RRGADKAKPPPGGGE	P50542	456	GAGLGPSKRILGSLL	Q8N3U4	714	DLFACNYKLLKTGIE
O43242	186	KRYKEAQKISDDLMQ	P50548	394	RQRAAGEKAVAGADK	Q8N3U4	755	ITESSSTKEDLLRLK
O43242	2	******MKQEGSARR	P50549	116	FKFSYGEKCLYNVSA	Q8N3U4	901	NDYGDIIKETMSKTR
O43242	223	RVYEFLDKLDVVRSF	P50549	33	PTNVRKRKFINRDLA	Q8N3U4	912	SKTRQIDKIQCAKTL
O43242	296	LYYTGRIKAIQLEYS	P50552	21	MLYDDGNKRWLPAGT	Q8N3U4	949	SSTFSGIKELARRFA
O43242	374	VRTGNLAKFNQVLDQ	P50552	240	AKLRKVSKQEEASGG	Q8N3V7	475	EVHFTLAKPPSVVNR
O43242	455	EASINHEKGYVQSKE	P50552	276	AMLARRRKATQVGEK	Q8N3V7	512	ERRHFGEKAPAPQPP
O43242	54	STGEADGKTAAAAAE	P50552	283	KATQVGEKTPKDESA	Q8N3V7	649	LVQTADEKRRQRDQG
O43242	76	TVTLEDIKEHVKQLE	P50552	348	YSDLQRVKQELLEEV	Q8N3V7	723	NLSEASGKGAELYAR
O43242	84	EHVKQLEKAVSGKEP	P50552	356	QELLEEVKKELQKVK	Q8N3X1	290	TISVSSSKSGPVIAK
O43248	174	AEPPCSGKGEAKGEP	P50552	363	KKELQKVKEEIIEAF	Q8N3X1	297	KSGPVIAKREVKKEV
O43248	178	CSGKGEAKGEPEAPP	P50552	71	CAIVRGVKYNQATPN	Q8N3X1	302	IAKREVKKEVNEGIQ
O43248	219	GSAHSVAKEPAKGAA	P50570	240	GVVNRSQKDIEGKKD	Q8N3X1	348	WRRKVICKEEPVSEV
O43248	223	SVAKEPAKGAAPNAP	P50570	257	AALAAERKFFLSHPA	Q8N3X1	927	PKMPPPEKTKKGRKD
O43248	241	KKRCPYSKFQIRELE	P50570	299	SLPALRSKLQSQLLS	Q8N3X6	319	LEALPAGKPASFKNK
O43252	12	GSLCKKVKLSNNAQN	P50570	445	TVRQCTSKLSSYPRL	Q8N3Z6	131	QSNELVDKKCKSDIE
O43252	183	KARAGEIKGFTGIDS	P50570	577	LKIRDVEKGFMSNKH	Q8N3Z6	239	QRYYSANKNIICRNC
O43252	243	ELYVPENKLHLAKTD	P50570	598	TEQRNVYKDLRQIEL	Q8N427	308	DAFFPDFKKMKSMKL
O43252	258	AETLPALKINKVDMQ	P50570	87	HAEFLHCKSKKFTDF	Q8N427	356	RQVVLSEKEAQALCK
O43252	9	EIPGSLCKKVKLSNN	P50570	90	FLHCKSKKFTDFDEV	Q8N488	104	EISPSVTKKNTNKKT
O43257	53	AGLPQLGKRLPQFDD	P50579	289	DATNTGIKCAGIDVR	Q8N4B1	26	DNAGFLYKKGGRHAA
O43257	66	DDDADTGKKKKKTRG	P50579	323	DGKTYQVKPIRNLNG	Q8N4C7	9	KDRLQELKQRTKEIE
O43257	67	DDADTGKKKKKTRGD	P50579	385	MECSHYMKNFDVGHV	Q8N4C8	590	VAHRVPLKPYAAPVP
O43264	35	TRRVEEIKGEVCNMI	P50579	427	LDRLGESKYLMALKN	Q8N4H5	10	RIEGLAPKLDPEEMK
O43264	634	RQVLHQLKRLGIVWQ	P50579	46	RRKKKKSKGPSAAGE	Q8N4H5	17	KLDPEEMKRKMREDV
O43264	708	SEESKNKKYQEEVPV	P50579	58	AGEQEPDKESGASVD	Q8N4H5	46	RVTPFILKKLDSI**
O43264	719	EVPVYVPKWMPFKEL	P50579	79	ERSALEDKERDEDDE	Q8N4J0	157	ASTFDMDKLKSTLKQ
O43264	777	RRAAALAKIK*****	P50579	98	DGDGATGKKKKKKKK	Q8N4J0	163	DKLKSTLKQFVRDWS
O43264	96	TGEFTDLKQQLERDS	P50583	129	ACQLAQFKEMKAALQ	Q8N4J0	252	CSEINKYKLYPWIHQ
O43283	502	MREKELIKREQAVEK	P50583	89	YVARNKPKTVIYWLA	Q8N4P3	123	KLVKLADKLYNLRDL
O43290	125	LSIEETNKLRAKLGL	P50613	328	SNPALAIKRKRTEAL	Q8N4P3	25	KHRQQRRKDPEGTPY
O43290	129	ETNKLRAKLGLKPLE	P50748	1092	KKCSDLFKYHCNADT	Q8N4P3	93	VEEVTDDKTLPKLER
O43290	133	LRAKLGLKPLEVNAI	P50748	1316	RHVVMELKEKAVIFI	Q8N4P3	97	TDDKTLPKLERKRLQ
O43290	141	PLEVNAIKKEAGTKE	P50748	726	IVFRMFDKVLAPELI	Q8N4P6	429	PSRAKGIKIGSREKR
O43290	147	IKKEAGTKEEPVTAD	P50748	859	REVNLLNKEIMRVVR	Q8N4Q0	225	CDRPINYKTEPVGTV
O43290	183	EKRLLNQKLGKIKTL	P50750	178	ARAFSLAKNSQPNRY	Q8N4Q1	136	PIEATATKEEEGSS*
O43290	219	KEKDLAEKRAKLLEE	P50750	21	DEVSKYEKLAKIGQG	Q8N4S0	230	MEQKTPEKTLAAQKR
O43290	302	VDKERAEKNVELRKK	P50750	3	*****MAKQYDSVEC	Q8N4S0	236	EKTLAAQKREKLQKL
O43290	329	VDDLAQQKPRSILSK	P50750	35	GTFGEVFKARHRKTG	Q8N4T8	190	TDMTKDLKEEHLKKN
O43290	336	KPRSILSKYDEELEG	P50750	44	RHRKTGQKVALKKVL	Q8N4T8	3	*****MDKVCAVFGG
O43290	400	PEEMVTFKKTKRRVK	P50750	48	TGQKVALKKVLMENE	Q8N4T8	59	AFSCDVAKEHDVQNT
O43290	648	ALLLCQNKGLLETTV	P50750	49	GQKVALKKVLMENEK	Q8N4T8	96	DGLLVRTKTEDMVSQ
O43290	657	LLETTVQKVARVKAP	P50851	1731	RSVIVAAKKSAVSPS	Q8N4V1	79	ATSELKNKTFDTLRN
O43290	662	VQKVARVKAPNKSLP	P50851	195	GKLLSVLKHMPQKYG	Q8N543	105	FQQSDDLKKRREPHI
O43290	666	ARVKAPNKSLPSAVY	P50851	2116	DEEDPNFKKIDPKIL	Q8N543	4	****MNGKRPAEPGP
O43290	684	DKMAIDDKYSRREEY	P50851	2117	EEDPNFKKIDPKILA	Q8N543	91	MNLDFHEKYNDLYKF
O43290	705	FKEKDGYKPDVKIEY	P50851	2742	EGPENCLKPKLIQAS	Q8N554	341	APGQLGEKQLPSSTS
O43290	780	QEKQKAQKTPYIVLS	P50897	191	EYWHDPIKEDVYRNH	Q8N554	522	QMRHSGAKPLQCEVC
O43290	791	IVLSGSGKSMNANTI	P50914	103	EARERKAKMTDFDRF	Q8N556	155	MDLVKDAKICAFLLR
O43295	216	PQRRSSVKKIEKMKE	P50914	132	NEVKKLQKAALLKAS	Q8N556	171	KRFGQWTKLLCVIKD
O43295	220	SSVKKIEKMKEKRQA	P50914	137	LQKAALLKASPKKAP	Q8N556	177	TKLLCVIKDTKLLCY
O43295	222	VKKIEKMKEKRQAKY	P50914	164	AAAKVPAKKITAASK	Q8N556	180	LCVIKDTKLLCYKSS
O43295	224	KIEKMKEKRQAKYSE	P50914	165	AAKVPAKKITAASKK	Q8N556	242	EQAEQWLKVIKEAYS
O43298	247	HKRWIHVKPERLEQA	P50914	171	KKITAASKKAPAQKV	Q8N556	512	PCINGSLKGKKPPVA
O43303	1001	VSGVYAGKIQRKRPN	P50914	172	KITAASKKAPAQKVP	Q8N567	25	ATSWEDMKKGSFEGT
O43303	648	SEELLKSKMLAFEEM	P50914	177	SKKAPAQKVPAQKAT	Q8N567	50	EANRLSLKNDAPQAK
O43314	248	PTDGTDVKVYTVGPD	P50914	182	AQKVPAQKATGQKAA	Q8N584	416	IVFKEVQKLFKRKNN
O43314	270	KSPALDGKVERDSEG	P50914	187	AQKATGQKAAPAPKA	Q8N584	419	KEVQKLFKRKNNQIE
O43314	949	DRAVILFKPMVSEPI	P50914	193	QKAAPAPKAQKGQKA	Q8N584	513	QYFQRAVKDELCRQN
O43318	474	TSGPTSEKPTRSHPW	P50914	196	APAPKAQKGQKAPAQ	Q8N584	91	QLACDDLKTTEKLCE
O43324	12	AELSLLEKSLGLSKG	P50914	199	PKAQKGQKAPAQKAP	Q8N5C6	167	VWGGTCKKEENDDDF
O43324	136	VDLTVQEKEKYLNVS	P50914	204	GQKAPAQKAPAPKAS	Q8N5C6	182	TFGQSALKKIKTETY
O43324	138	LTVQEKEKYLNVSRW	P50914	23	SFGPHAGKLVAIVDV	Q8N5C6	459	VNISDGVKDEFCRWC
O43324	166	LSSVVFIKNRLYTNS	P50914	53	RRQAMPFKCMQLTDF	Q8N5C6	9	SSLPRRAKVQVQDVV
O43324	21	LGLSKGNKYSAQGER	P50914	63	QLTDFILKFPHSAHQ	Q8N5C7	18	RSEENSSKFVETKQS
O43324	57	HLVKQANKEYLLGST	P50914	71	FPHSAHQKYVRQAWQ	Q8N5F7	112	SRPYGSDKPWPSLLD
O43324	96	NDIHTLLKDLNSYLE	P50914	79	YVRQAWQKADINTKW	Q8N5F7	305	TLTSQDDKPLNYGHA
O43361	466	IHTDAFSKRSDLIQH	P50914	85	QKADINTKWAATRWA	Q8N5G2	188	RKQKEVQKENEFYMQ
O43379	1127	LVKSPEVKLMDRGGS	P50990	138	GYEIACRKAHEILPN	Q8N5I9	6	**MEVHGKPKASPSC
O43379	832	RCLLTNGKLPLWAKR	P50990	152	NLVCCSAKNLRDIDE	Q8N5K1	131	NVGPLILKKKEV***
O43390	103	AFLCGVMKTYRQREK	P50990	16	PGFAQMLKEGAKHFS	Q8N5K1	74	KDSLINLKIQKENPK
O43390	114	QREKQGSKVQESTKG	P50990	171	LRTSIMSKQYGNEVF	Q8N5K1	81	KIQKENPKVVNEINI
O43390	126	TKGPDEAKIKALLER	P50990	20	QMLKEGAKHFSGLEE	Q8N5K1	95	IEDLCLTKAAYCRCW
O43390	146	DVTTGQRKYGGPPPD	P50990	206	VDNIRVCKILGSGIS	Q8N5L8	86	PGLHQLTKLRFLQTE
O43390	171	GTEVFVGKIPRDLYE	P50990	224	VLHGMVFKKETEGDV	Q8N5M1	133	QLIRAAVKFLDTDTI
O43390	216	AFITFCGKEAAQEAV	P50990	225	LHGMVFKKETEGDVT	Q8N5M4	12	LQEAQLYKEEGNQRY
O43390	224	EAAQEAVKLCDSYEI	P50990	235	EGDVTSVKDAKIAVY	Q8N5M4	99	RVREYSQKVLERQPD
O43390	235	SYEIRPGKHLGVCIS	P50990	238	VTSVKDAKIAVYSCP	Q8N5P1	171	GSQEEDGKPKEKQQH
O43390	259	SIPKNKTKENILEEF	P50990	270	EELMNFSKGEENLMD	Q8N5Y2	383	DTSASMPKLFLHLEK
O43390	285	LYHQPDDKKKNRGFC	P50990	296	NVVVTGGKVADMALH	Q8N5Y2	408	PIPLTPSKEGSAVFA
O43390	286	YHQPDDKKKNRGFCF	P50990	307	MALHYANKYNIMLVR	Q8N5Y2	42	IVDVIVGKDEKGRKI
O43390	300	FLEYEDHKSAAQARR	P50990	318	MLVRLNSKWDLRRLC	Q8N5Y2	45	VIVGKDEKGRKIPEY
O43390	341	PEVMAKVKVLFVRNL	P50990	326	WDLRRLCKTVGATAL	Q8N5Z0	31	DILSRGPKSMISLAG
O43390	366	KSFSEFGKLERVKKL	P50990	367	VVVFKHEKEDGAIST	Q8N5Z0	49	NPNMFPFKTAVITVE
O43390	374	LERVKKLKDYAFVHF	P50990	37	YRNIQACKELAQTTR	Q8N655	1033	DALAVESKPSRKSVC
O43390	389	EDRGAAVKAMDEMNG	P50990	400	DDGVNTFKVLTRDKR	Q8N655	1125	ATKTPAAKRPAARDR
O43390	397	AMDEMNGKEIEGEEI	P50990	421	ATEIELAKQITSYGE	Q8N655	140	KMISTSIKTARKSKR
O43390	41	IEAGLPQKVAERLDE	P50990	439	GLEQYAIKKFAEAFE	Q8N655	56	NSSRTADKENTLQCP
O43390	584	GYNQPDSKRRQTNNQ	P50990	440	LEQYAIKKFAEAFEA	Q8N655	659	PSESIACKRDPEQAK
O43390	84	LSVLQQFKESDLSHV	P50990	466	KANEVISKLYAVHQE	Q8N668	96	DQAAVISKFWKSHKT
O43390	94	DLSHVQNKSAFLCGV	P50990	528	VDQIIMAKPAGGPKP	Q8N680	388	HMYIHTGKPFKCSTC
O43395	103	GDDSEISKESSGVKK	P50990	534	AKPAGGPKPPSGKKD	Q8N684	154	GKVLNGEKVDVRPAT
O43395	12	KRELDELKPWIEKTV	P50990	539	GPKPPSGKKDWDDDQ	Q8N684	342	AEFEDIMKRNRAISS
O43395	17	ELKPWIEKTVKRVLG	P50990	62	MVINHLEKLFVTNDA	Q8N684	397	RVLISSLKDCLHGIE
O43395	220	IQAQLALKPGLIGNA	P50990	7	*MALHVPKAPGFAQM	Q8N688	39	CRYRCSKKERVYVYC
O43395	252	VELKDQTKPTPLILD	P50991	126	SCTKLLQKGIHPTII	Q8N6H7	215	LKSSIIGKKKPAAAK
O43395	282	THRMPTLKANIRAVK	P50991	139	IISESFQKALEKGIE	Q8N6H7	253	RQAQVAEKLREQQAA
O43395	294	AVKREQFKQQLKEKP	P50991	213	RDIKIVKKLGGTIDD	Q8N6H7	298	KLQNLEGKKREQAER
O43395	495	EAVQDPTKVEAHVRA	P50991	232	EGLVLTQKVSNSGIT	Q8N6H7	336	QETPVSAKSSRSQLD
O43395	52	KKAADHLKPFLDDST	P50991	288	AYILNLVKQIKKTGC	Q8N6H7	429	RQKFAGAKAISSDMF
O43395	647	DRSFGEMKFKQCPTE	P50991	29	GAYQDRDKPAQIRFS	Q8N6M0	29	EKKELQAKIQGMKNA
O43395	65	STLRFVDKLFEAVEE	P50991	302	CNVLLIQKSILRDAL	Q8N6N3	144	DDAPQNAKKARLLPE
O43396	192	PDNGQGPKYVKIFIN	P50991	319	LALHFLNKMKIMVIK	Q8N6N3	179	VEPGEPAKKKK****
O43399	119	KLGEWNEKVTQSDLY	P50991	321	LHFLNKMKIMVIKDI	Q8N6N7	27	RPDDGELKELYGLYK
O43399	127	VTQSDLYKKTQETLS	P50991	326	KMKIMVIKDIEREDI	Q8N6N7	52	CPGMLDLKGKAKWEA
O43399	165	MRNSATFKSFEDRVG	P50991	375	NGSGKLLKITGCASP	Q8N6T3	231	AAKEGATKFGSQASQ
O43399	70	LRQVLAAKERHCGEL	P50991	384	TGCASPGKTVTIVVR	Q8N6T3	253	SLNENVLKPAQEKVK
O43402	110	SPNQVAEKVASRIAE	P50991	395	IVVRGSNKLVIEEAE	Q8N6T3	74	WKDIELEKMKAGGNA
O43402	20	KMVLHGAKYPHCAVN	P50991	489	NRHAQGEKTAGINVR	Q8N6T7	170	GRLCTVAKARGLRAC
O43402	204	WTNPEINKAVLHLC*	P50991	531	ETVRSILKIDDVVNT	Q8N7B6	206	HLLTSLSKRLMDKKF
O43414	239	GLLDPNVKSIFVTCG	P50991	55	IRTSLGPKGMDKMIQ	Q8N7H5	119	IQAPTSSKRSQQHAK
O43414	276	FKQWINLKKAYSFAM	P50991	65	DKMIQDGKGDVTITN	Q8N7H5	126	KRSQQHAKVVPWMRK
O43414	314	HSGIDDCKNIANIMK	P50991	79	NDGATILKQMQVLHP	Q8N7H5	150	RYGISNEKPEVKIGV
O43414	321	KNIANIMKTLAYRGF	P50995	243	QQILLSFKTAYGKDL	Q8N7H5	160	VKIGVSVKQQFTEEE
O43414	331	AYRGFIFKQTSKPF*	P50995	248	SFKTAYGKDLIKDLK	Q8N7H5	196	SISQHYSKPRVTPVE
O43422	555	IQMKLPGKFRRAHQG	P50995	255	KDLIKDLKSELSGNF	Q8N7H5	34	SGVVCRVKYCNSLPD
O43422	600	IFSEQHLKALKCLSL	P50995	282	LFDIYEIKEAIKGVG	Q8N7H5	359	KHRDMNEKELEAQEA
O43422	654	IKWKHRGKDIELPST	P50995	315	RELNRAYKAEFKKTL	Q8N7H5	62	QNRFVQYKATSLEKQ
O43423	82	GLEVLAEKCPNLTHL	P50995	378	RLGTDESKFNAVLCS	Q8N7M0	108	ELCRQMTKTISEVIK
O43423	97	YLSGNKIKDLSTIEP	P50995	408	MTGRDIEKSICREMS	Q8N7R7	332	ISRLCEDKDLCRAAM
O43427	142	RRQFDNFKRVFKVVE	P50995	479	EYKRMYGKSLYHDIS	Q8N7U6	411	KSYEEVFKEGNEGHD
O43427	146	DNFKRVFKVVEEMRG	P51003	144	LKLQEEVKDLRAVEE	Q8N7U6	668	PEQTLLIKPEDIVLK
O43427	251	LKVLVADKDLLDLHK	P51003	32	PISLAAPKETDCVLT	Q8N7X0	1509	EREQSTRKENIQTGP
O43432	1051	SRVLDPSKFLKITKP	P51003	489	KIAAMHVKRKQLHQL	Q8N7X0	337	IKDGKEVKDVKEFKP
O43432	152	RDPNQGGKDITEEIM	P51003	641	TSGNAATKIPTPIVG	Q8N7X0	340	GKEVKDVKEFKPESS
O43432	1566	NGKGVALKSVTAFFT	P51003	650	PTPIVGVKRTSSPHK	Q8N7X0	343	VKDVKEFKPESSLTT
O43432	243	RLVLSGEKKEQEGQT	P51003	685	LALSGHDKTEAKEQL	Q8N7Z2	418	KMWRQEEKIREQEEK
O43432	764	KVRSILNKLTPQMFN	P51003	736	ANPIPVIKNSIKLRL	Q8N7Z2	432	KIREQEKKMWRQEEK
O43432	894	RRSIGNIKFIGELFK	P51003	740	PVIKNSIKLRLNR**	Q8N7Z5	1255	NQKDQKQKSALDEAD
O43432	901	KFIGELFKLKMLTEA	P51114	17	GSNGAFYKGFIKDVH	Q8N7Z5	1265	LDEADDEKMKELLRS
O43432	903	IGELFKLKMLTEAIM	P51114	195	HLRSIRTKLMLMSRN	Q8N806	105	RCDCGNSKFKNLECK
O43432	916	IMHDCVVKLLKNHDE	P51114	207	SRNEEATKHLECTKQ	Q8N806	287	AESKSGCKLQELKAK
O43432	919	DCVVKLLKNHDEESL	P51114	295	VPRNLVGKVIGKNGK	Q8N806	312	WPLNWRSKLCTCQDC
O43432	938	RLLTTIGKDLDFEKA	P51114	302	KVIGKNGKVIQEIVD	Q8N806	54	SYSQGSVKRQALYAC
O43432	944	GKDLDFEKAKPRMDQ	P51114	310	VIQEIVDKSGVVRVR	Q8N865	264	WDPICSAKEANIQRN
O43439	258	IAPEPPAKRVCTISP	P51114	325	IEGDNENKLPREDGM	Q8N865	375	HTFVPSSKEMVALSD
O43439	447	KTEEAVNKVKIQAMS	P51114	470	SSISSVLKDPDSNPY	Q8N865	81	LPEDHRPKYEPPRVM
O43447	101	PFADENFKLRHSAPG	P51114	567	KNKKEMAKDVIEEHG	Q8N884	131	RGARCSTKPRPPPGP
O43447	137	KCDWLDGKHVVFGKI	P51114	578	EEHGPSEKAINGPTS	Q8N884	171	KLRAVLEKLKLSRDD
O43447	153	DGLLVMRKIENVPTG	P51114	593	ASGDDISKLQRTPGE	Q8N884	285	SKFRKIIKEEINDIK
O43447	166	TGPNNKPKLPVVISQ	P51114	607	EEKINTLKEENTQEA	Q8N884	384	LSFSHIEKEILNNHG
O43447	38	LFADVVPKTAENFRQ	P51114	83	PCGWWLAKVRMMKGE	Q8N884	392	EILNNHGKSKTCCEN
O43447	61	DGVPIGYKGSTFHRV	P51116	27	GSNGAFYKGFVKDVH	Q8N884	394	LNNHGKSKTCCENKE
O43448	315	IKGYQWLKDKVQSED	P51116	459	ASETESEKREEPNRA	Q8N884	411	CCRKDCLKLMKYLLE
O43474	252	PSVISVSKGSPDGSH	P51116	642	EDSLSGQKGDSVSKL	Q8N884	414	KDCLKLMKYLLEQLK
O43474	52	REELSHMKRLPPVLP	P51148	141	NKADLASKRAVEFQE	Q8N884	432	KDKKHLDKFSSYHVK
O43488	105	CRVKIATKANPWDGK	P51148	18	NGPAAGNKICQFKLV	Q8N884	439	KFSSYHVKTAFFHVC
O43488	128	SQLETSLKRLQCPQV	P51148	180	EIFMAIAKKLPKNEP	Q8N884	50	AALPKAGKFGPARKS
O43488	236	AGGLLTGKYKYEDKD	P51148	184	AIAKKLPKNEPQNAT	Q8N884	7	*MQPWHGKAMQRASE
O43488	238	GLLTGKYKYEDKDGK	P51149	146	AQAWCYSKNNIPYFE	Q8N8A2	171	ANINAFDKKDRRALH
O43490	82	TLRKFLQKAYESKID	P51149	31	LMNQYVNKKFSNQYK	Q8N8A6	331	EQESLVQKTADGYRC
O43491	135	DAEEMAQKKQEIKVE	P51149	32	MNQYVNKKFSNQYKA	Q8N8A6	601	GRTARAGKTGQAFTL
O43491	176	VSKEREEKVKETQED	P51149	48	IGADFLTKEVMVDDR	Q8N8A6	658	SQLEESVKEERKQRA
O43491	184	VKETQEDKLEGGAAK	P51153	107	QNWMKSIKENASAGV	Q8N8A6	90	SPEAPQGKRRKADGE
O43491	191	KLEGGAAKRETKEVQ	P51153	3	*****MAKAYDHLFK	Q8N8R7	169	EFAPETGKREKRRLT
O43491	374	QTKELEEKVAELHKT	P51153	58	DIEGKKIKLQVWDTA	Q8N8S7	21	MVYDDANKKWVPAGG
O43491	514	KFLTLGSKFRYSGRT	P51157	39	FAQETFGKQYKQTIG	Q8N8S7	461	RRRRIAEKGSTIETE
O43502	72	RRECLTNKPRYAGTS	P51397	20	AGHPPAVKAGGMRIV	Q8N8S7	470	STIETEQKEDKGEDS
O43513	185	SEAGMRVKTEPMDAD	P51397	29	GGMRIVQKHPHTGDT	Q8N8S7	473	ETEQKEDKGEDSEPV
O43521	3	*****MAKQPSDVSS	P51397	68	GVIARGDKDFPPAAA	Q8N8S7	574	RKELTKLKEELIDAI
O43524	242	IINPDGGKSGKAPRR	P51397	8	MSSPPEGKLETKAGH	Q8N8S7	66	VINCAIPKGLKYNQA
O43524	259	VSMDNSNKYTKSRGR	P51397	81	AAQVAHQKPHASMDK	Q8N8S7	69	CAIPKGLKYNQATQT
O43524	271	RGRAAKKKAALQTAP	P51398	103	EACLMVRKPALELLH	Q8N8U2	228	KRKLEAEKDYVFDKR
O43524	290	DSPSQLSKWPGSPTS	P51398	175	LLQSSYNKQRFDQPL	Q8N8U2	234	EKDYVFDKRLRYSVR
O43524	569	SSSLGSAKHQQQSPV	P51398	192	STWLKNFKTTNERFL	Q8N8U2	256	FRDIVVRKEEGFTHI
O43570	194	FSHLQHVKYKGQEAF	P51398	207	NQIKVQEKYVWNKRE	Q8N8U2	416	EMLFCGRKLTAQEAC
O43583	22	GDPRNSAKLDADYPL	P51398	212	QEKYVWNKRESTEKG	Q8N8U2	477	VLEDVNEKECLMLKQ
O43583	59	KCRQWLEKNFPNEFA	P51398	218	NKRESTEKGSPLGEV	Q8N8U2	490	KQLWSSSKGLDSLFS
O43592	260	KGMDPVDKMKLVESL	P51398	318	SQTGSLFKPRKAYLP	Q8N954	119	HEASLKRKAEEKLES
O43592	627	LLTPLMEKFKILLEK	P51451	16	PDKEKPIKEKDKGQW	Q8N954	123	LKRKAEEKLESYRKK
O43592	634	KFKILLEKLMLAQDE	P51452	50	SVAQDIPKLQKLGIT	Q8N954	64	ERRDIGLKNALGCEN
O43592	668	TSKAFSNKQTVKQCG	P51452	53	QDIPKLQKLGITHVL	Q8N999	147	PGWVPVEKNNKQYCW
O43598	113	GRAVAFNKRILCLFR	P51530	567	FRLDQEEKNCDIDTP	Q8N999	314	FLKIDNQKFVRLKDI
O43602	50	LQALSNEKKAKKVRF	P51530	624	DTVACILKGLNKPQR	Q8N9F7	105	NVNISDLKYCELPPY
O43602	51	QALSNEKKAKKVRFY	P51531	1051	ELYRASGKFELLDRI	Q8N9M1	304	KLGRGPAKASPQPAL
O43615	105	QEARRKYKTIESETV	P51531	1183	TVNSVEEKILAAAKY	Q8N9N2	110	GKRGDTRKKIEMETK
O43615	138	ESLHEVSKSDLGRKI	P51531	1189	EKILAAAKYKLNVDQ	Q8N9N5	275	SNLSGQGKHGKKQLD
O43615	264	RFFEMKMKYDESDNA	P51531	1207	QAGMFDQKSSSHERR	Q8N9N5	331	RGQSLAVKSFSRRTP
O43633	118	GTMNRQLKLPQIQKI	P51531	1302	TCEEEEEKIFGRGSR	Q8N9R8	100	RTFDVYTKLWKFQQQ
O43633	124	LKLPQIQKIMMEFER	P51531	1434	FIQLPSRKELPEYYE	Q8N9R8	103	DVYTKLWKFQQQHRQ
O43633	89	NIQAVSLKIQTLKSN	P51531	1551	KDDKGRDKGKGKKRP	Q8N9R8	25	RLTGTVEKPPRKRRS
O43633	94	SLKIQTLKSNNSMAQ	P51531	1553	DKGRDKGKGKKRPNR	Q8N9R8	68	DFCYLLDKSKQLFNG
O43639	79	KDTLGLGKTRRKTSA	P51531	1555	GRDKGKGKKRPNRGK	Q8N9T8	158	QSYVEEQKQLKESFR
O43660	135	VALPLQTKADANRTA	P51531	1556	RDKGKGKKRPNRGKA	Q8N9T8	475	REAPLTGKKKRKSPF
O43660	180	KNSALMAKKAPTMPK	P51531	190	RAQILAYKMLARGQP	Q8N9T8	588	WKKRQVFKSLCREEA
O43660	268	LFSCGEDKQVKCWDL	P51531	333	SRISPIQKPQGLDPV	Q8N9T8	604	TPAEATGKPQRDEAG
O43660	271	CGEDKQVKCWDLEYN	P51531	413	LETALNSKAYKRSKR	Q8N9T8	83	KDPRIYQKDATFYNR
O43660	279	CWDLEYNKVIRHYHG	P51531	416	ALNSKAYKRSKRQTL	Q8N9W6	73	NDRAGVSKGYGFVTF
O43660	31	MFVADNGKPVPLDEE	P51531	431	REARMTEKLEKQQKI	Q8N9W6	99	EAEKLNYKDKKLNIG
O43660	41	PLDEESHKRKMAIKL	P51531	437	EKLEKQQKIEQERKR	Q8NA47	399	EADMYESKYGEVSKT
O43660	484	LLTAEADKTIKVYRE	P51531	447	QERKRRQKHQEYLNS	Q8NA54	475	LDKCSAPKIWRTPNG
O43660	505	ETHPVSWKPEIIKRK	P51531	460	NSILQHAKDFKEYHR	Q8NA56	335	GEMTEAIKYLKKFVK
O43660	62	VLHMPTSKENLKEKG	P51531	604	VTHTETGKVLFGPEA	Q8NA61	191	EENRMLSKENKILQV
O43660	7	*MVEEVQKHSVHTLV	P51531	672	NSEEVSEKDAKQIIE	Q8NA69	458	YKDEFPFKYQGPAAL
O43663	17	ESIVCLQKALNHLRE	P51531	862	RMKNHHCKLTQVLNT	Q8NA72	538	IPQATAAKYPRTIHP
O43663	387	NRGGNLLKEEKQRAK	P51531	940	LIIRRLHKVLRPFLL	Q8NA82	69	FSSRSSSKQSSSEED
O43663	407	PKLEEELKARIELWE	P51531	961	VESQLPEKVEYVIKC	Q8NAF0	334	APLPAAGKKDDKASG
O43663	419	LWEQEHSKAFMVNGQ	P51531	967	EKVEYVIKCDMSALQ	Q8NAV1	118	GTAIDCYKYLEPLYN
O43663	484	LAPNTPGKARKLNTT	P51531	997	DGSEKDKKGKGGAKT	Q8NAV1	23	NPQYLVEKIIRTRIY
O43663	524	RLPPSGSKPVAASTC	P51531	999	SEKDKKGKGGAKTLM	Q8NAV1	92	DIIVEFIKNEDFKYV
O43663	534	AASTCSGKKTPRTGR	P51532	1024	LLTDGSEKDKKGKGG	Q8NAV1	97	FIKNEDFKYVRMLGA
O43665	165	PDAQTAAKRASRIYN	P51532	1033	KKGKGGTKTLMNTIM	Q8NB16	157	MLRRDNEKIEASLRR
O43670	10	RKKKKQLKPWCWYCN	P51532	1122	YFAYRGFKYLRLDGT	Q8NB16	16	TLGQVIHKRCEEMKY
O43670	100	RRRLLEQKTQESQKK	P51532	1450	RGRPPAEKLSPNPPN	Q8NB16	66	TTAMNRFKAALEEAN
O43670	24	NRDFDDEKILIQHQK	P51532	1464	NLTKKMKKIVDAVIK	Q8NB16	95	FLTASQDKILFKDVN
O43670	31	KILIQHQKAKHFKCH	P51532	188	RAQIMAYKMLARGQP	Q8NB78	122	KIWTSNGKTEPSPKA
O43670	350	PAASITSKPATLTTT	P51532	207	LQMAVQGKRPMPGMQ	Q8NB78	165	QLTPQIAKTYRCGMK
O43670	36	HQKAKHFKCHICHKK	P51532	357	SRITPIQKPRGLDPV	Q8NB78	178	MKPNTAIKPETSDHC
O43670	362	TTTSATSKLIHPDED	P51532	455	REARITEKLEKQQKI	Q8NB90	471	GAQNEVEKRVVASLL
O43670	43	KCHICHKKLYTGPGL	P51532	496	YHRSVTGKIQKLTKA	Q8NB90	700	KGPELMNKYVGESER
O43674	131	NFYDSPEKIYERTMA	P51532	502	GKIQKLTKAVATYHA	Q8NB91	745	LPINCFLKNLKSGSE
O43674	146	VLQIEAEKAELRVKE	P51532	588	KKKKKKKKAENAEGQ	Q8NBA8	122	AACLPQDKCKVKIGR
O43674	184	ELIDHSPKATPDN**	P51532	618	QMSDLPVKVIHVESG	Q8NBF6	202	FKLILLEKKVLFYIS
O43676	23	LPDYRQWKIEGTPLE	P51532	626	VIHVESGKILTGTDA	Q8NBF6	203	KLILLEKKVLFYISP
O43676	34	TPLETIQKKLAAKGL	P51532	689	LPVEEKKKIPDPDSD	Q8NBI5	255	SKEFLSAKEETPGAG
O43677	38	VREPPNAKPDWLKVG	P51532	711	RHIIENAKQDVDDEY	Q8NBI5	264	ETPGAGQKQELRSFW
O43678	13	ASRGVGAKLGLREIR	P51532	94	DPRYNQMKGMGMRSG	Q8NBQ5	2	******MKFLLDILL
O43678	64	ECSDVQPKLWARYAF	P51532	991	VEAQLPEKVEYVIKC	Q8NBQ5	62	EFAKLKSKLVLWDIN
O43678	98	LENVLSGKA******	P51532	997	EKVEYVIKCDMSALQ	Q8NBQ5	70	LVLWDINKHGLEETA
O43679	232	LSPRDCLKTCLFQKW	P51572	149	SASEAAKKYMEENDQ	Q8NBS9	105	TWNDLGDKYNSMEDA
O43679	238	LKTCLFQKWQRMVAP	P51572	158	MEENDQLKKGAAVDG	Q8NBS9	113	YNSMEDAKVYVAKVD
O43681	267	RLIQELAKCKIDTHN	P51572	167	GAAVDGGKLDVGNAE	Q8NBS9	118	DAKVYVAKVDCTAHS
O43681	330	HEVRGADKVNTFSAL	P51572	176	DVGNAEVKLEEENRS	Q8NBS9	150	KPGQEAVKYQGPRDF
O43681	45	KWIFVGGKGGVGKTT	P51572	190	SLKADLQKLKDELAS	Q8NBS9	244	SETVKIGKVDCTQHY
O43681	63	SLAVQLSKGRESVLI	P51572	201	ELASTKQKLEKAENQ	Q8NBS9	390	AERNICSKYSVRGYP
O43683	653	VVPSRDGKFSPIQEK	P51572	204	STKQKLEKAENQVLA	Q8NBT2	50	ETQDGAEKQLREILT
O43684	139	GTFSQPEKVYTLSVS	P51572	243	AVDGPMDKKEE****	Q8NBU5	114	VILPIKKKHLFENSR
O43684	179	QRRESSLKYQTRCIR	P51572	72	DAVREIRKYDDVTEK	Q8NBU5	144	CGKTLIAKATAKEAG
O43684	191	CIRAFPNKQGYVLSS	P51572	95	AMEHFHMKLFRAQRN	Q8NBU5	165	QPSTLTDKWYGESQK
O43684	216	DPSPEVQKKKYAFKC	P51580	210	EIERLFGKICNIRCL	Q8NBU5	300	GFSGSDLKEMCRDAA
O43684	222	QKKKYAFKCHRLKEN	P51580	219	CNIRCLEKVDAFEER	Q8NBX0	136	FLELMQLKYHEKAAD
O43684	227	AFKCHRLKENNIEQI	P51580	32	TLEEWQDKWVNGKTA	Q8NBX0	228	PVPLIGPKLKRRWPI
O43684	322	QVTDAETKPKSPCT*	P51580	58	KHLDTFLKGKSGLRV	Q8NBX0	58	KLQRVLEKAALKLGR
O43684	52	PANSMRLKYQHTGAV	P51587	2882	EHEENTTKPYLPSRA	Q8NC51	102	TQPPVALKKEGIRRV
O43707	114	HKINNVNKALDFIAS	P51587	454	PRISSLPKSEKPLNE	Q8NC51	122	QQLQGEGKIIDRRPE
O43707	122	ALDFIASKGVKLVSI	P51587	601	IHDETSYKGKKIPKD	Q8NC51	140	PRERRFEKPLEEKGE
O43707	125	FIASKGVKLVSIGAE	P51608	210	TSEGVQVKRVLEKSP	Q8NC51	211	FSHYSGLKHEDKRGG
O43707	214	PELIEYDKLRKDDPV	P51608	219	VLEKSPGKLLVKMPF	Q8NC51	228	SHNWGTVKDELTESP
O43707	217	IEYDKLRKDDPVTNL	P51608	304	QETVLPIKKRKTRET	Q8NC51	236	DELTESPKYIQKQIS
O43707	233	NAFEVAEKYLDIPKM	P51608	321	IEVKEVVKPLLVSTL	Q8NC51	240	ESPKYIQKQISYNYS
O43707	283	TAANRICKVLAVNQE	P51608	331	LVSTLGEKSGKGLKT	Q8NC51	273	PVADTENKENEVEEV
O43707	323	LEDRVPQKTIQEMQQ	P51608	431	LESDGCPKEPAKTQP	Q8NC51	281	ENEVEEVKEEGPKEM
O43707	331	TIQEMQQKLEDFRDY	P51608	449	TAATAAEKYKHRGEG	Q8NC51	294	EMTLDEWKAIQNKDR
O43707	350	KPPKVQEKCQLEINF	P51610	1163	LEAAQGSKSQCQTRQ	Q8NC51	303	IQNKDRAKVEFNIRK
O43707	417	RLDHLAEKFRQKASI	P51610	1217	QLAPLSSKVRLSSPS	Q8NC51	310	KVEFNIRKPNEGADG
O43707	432	HEAWTDGKEAMLKHR	P51610	163	ANDSEDPKNNIPRYL	Q8NC51	32	SDPFEVLKAAENKKK
O43707	437	DGKEAMLKHRDYETA	P51610	1803	DLPPPPSKAPMKKEN	Q8NC51	320	EGADGQWKKGFVLHK
O43707	450	TATLSDIKALIRKHE	P51610	1863	LQPGTAYKFRVAGIN	Q8NC51	321	GADGQWKKGFVLHKS
O43707	455	DIKALIRKHEAFESD	P51610	1898	PGAPCAIKISKSPDG	Q8NC51	327	KKGFVLHKSKSEEAH
O43707	497	NVNTRCQKICDQWDA	P51610	1901	PCAIKISKSPDGAHL	Q8NC51	329	GFVLHKSKSEEAHAE
O43707	518	SRREALEKTEKQLEA	P51610	1976	AHIDYTTKPAIIFRI	Q8NC51	390	NRGSRTDKSSASAPD
O43707	521	EALEKTEKQLEAIDQ	P51610	1989	RIAARNEKGYGPATQ	Q8NC51	52	GVGGPGAKSAAQAAA
O43707	54	AWEKQQRKTFTAWCN	P51610	2005	RWLQETSKDSSGTKP	Q8NC51	68	TNSNAAGKQLRKESQ
O43707	592	EAILAIHKEAQRIAE	P51610	2011	SKDSSGTKPANKRPM	Q8NC51	91	PSVGVVDKKEETQPP
O43707	604	IAESNHIKLSGSNPY	P51610	2015	SGTKPANKRPMSSPE	Q8NC51	92	SVGVVDKKEETQPPV
O43707	622	TPQIINSKWEKVQQL	P51610	2028	PEMKSAPKKSKADGQ	Q8NC56	352	ELVTTVDKVVCLESA
O43707	625	IINSKWEKVQQLVPK	P51610	288	VKVATHEKEWKCTNT	Q8NC96	154	PKLDLGFKEGQTIKL
O43707	66	WCNSHLRKAGTQIEN	P51610	354	WNNQVCCKDLWYLET	Q8NCA5	190	VPPNHVGKPLLKKPM
O43707	701	ERSIVDYKPNLDLLE	P51610	690	VMSVVQTKPVQTSAV	Q8NCA5	246	RAKSQTEKLAKVYQP
O43707	779	ASFNHFDKDHGGALG	P51610	813	SGTGAPAKIITAVPK	Q8NCA5	249	SQTEKLAKVYQPKRS
O43707	859	FKVLAGDKNFITAEE	P51610	836	GVTQVVLKGAPGQPG	Q8NCA5	297	KTACAINKVLMGRVP
O43708	32	ALKGIDYKTVPINLI	P51610	866	PVTVSAVKPAVTTLV	Q8NCA5	325	PEMPPWQKRQDGPQQ
O43708	57	FQALNPMKQVPTLKI	P51617	217	HNFSEELKIGEGGFG	Q8NCD3	341	TGALRDCKNVLDVSC
O43709	196	VDYPNSAKAKKFYLC	P51648	218	KSPCYIDKDCDLDIV	Q8NCD3	506	EAFENLGKRSLEAGR
O43715	12	GEACTDMKREYDQCF	P51648	457	WGKFFLLKRFNKEKL	Q8NCD3	567	KTLSVPDKEVPGHGR
O43715	42	DPCTDLFKRYQQCVQ	P51649	126	ERSSLLRKWYNLMIQ	Q8NCD3	626	QTEGFLGKLNPDPHF
O43715	50	RYQQCVQKAIKEKEI	P51649	135	YNLMIQNKDDLARII	Q8NCE2	194	GDTHLFDKVRGYDIK
O43715	55	VQKAIKEKEIPIEGL	P51649	358	GIHDAFVKAFAEAMK	Q8NCF5	129	LVPVYSGKVKSSLRL
O43719	104	AEEPPQEKAPEPTDA	P51649	365	KAFAEAMKKNLRVGN	Q8NCF5	268	TPRLFPLKIRCRADL
O43719	169	DPQTEEFKVKLYKDN	P51649	387	QGPLINEKAVEKVEK	Q8NCM8	1383	RSIMTDIKKDNRVTT
O43719	174	EFKVKLYKDNQGNLK	P51649	394	KAVEKVEKQVNDAVS	Q8NCN2	188	RMETTPSKALRSRLQ
O43719	190	DGLCCYLKRESVELA	P51659	139	RAAWEHMKKQKYGRI	Q8NCN4	176	FIFRAPIKLSKPGEL
O43719	210	EDEIRGYKLHVEVAK	P51659	270	PMTPEAVKANWKKIC	Q8NCN4	282	SLAFLAGKLNSKVER
O43719	217	KLHVEVAKFQLKGEY	P51659	301	SIIEVLSKIDSEGGV	Q8NCN4	362	SSLASLHKPERSVSP
O43719	245	KKLSMQQKQLDWRPE	P51659	415	EQYLELYKPLPRAGK	Q8NCN5	100	RHLTIEQKMADYSNK
O43719	297	DLRVECSKFGQIRKL	P51659	424	LPRAGKLKCEAVVAD	Q8NCN5	759	RDALLQQKQNGVYKR
O43719	410	SEHPSTSKMNAQETA	P51659	46	NDLGGDFKGVGKGSL	Q8NCN5	854	YRFQAKAKLYPVASL
O43719	429	FEEPIDEKKFEKTED	P51659	565	AIKARFAKPVYPGQT	Q8NCR6	122	YNSSCCNKYTTYLPR
O43719	456	AKESSPEKEAEEGCP	P51659	57	KGSLAADKVVEEIRR	Q8NCR6	30	TSIKEVYKDPPLCAW
O43719	465	AEEGCPEKESEEGCP	P51659	579	TLQTEMWKEGNRIHF	Q8NCR6	86	GHPYLPEKYWLSQEE
O43719	473	ESEEGCPKRGFEGSC	P51659	614	PTSGTSAKTPSEGGK	Q8NCR6	96	LSQEEADKCSPNYLG
O43719	483	FEGSCSQKESEEGNP	P51659	621	KTPSEGGKLQSTFVF	Q8NCU4	751	YERVLLRKKGLEPWK
O43719	504	DSPKKESKKKTLKND	P51659	636	EEIGRRLKDIGPEVV	Q8NCU4	752	ERVLLRKKGLEPWKR
O43719	505	SPKKESKKKTLKNDC	P51659	644	DIGPEVVKKVNAVFE	Q8NCU4	758	KKGLEPWKRLRMQSK
O43719	506	PKKESKKKTLKNDCE	P51659	663	KGGNIGAKWTIDLKS	Q8NCW5	132	LVCARHLKLFGYEPT
O43719	509	ESKKKTLKNDCEENG	P51659	669	AKWTIDLKSGSGKVY	Q8NCW5	148	YYPKRPNKPLFTALV
O43719	661	KGLEAADKKAEEGDA	P51659	674	DLKSGSGKVYQGPAK	Q8ND24	142	LKAGCHTKQLASRNC
O43739	273	DREGWLLKLGGGRVK	P51659	707	LGKLDPQKAFFSGRL	Q8ND24	561	KLEKILEKLLTRFPQ
O43747	144	DLAGEVEKLLKTSNS	P51659	725	GNIMLSQKLQMILKD	Q8ND56	17	SKISLISKAEIRYEG
O43747	147	GEVEKLLKTSNSYLR	P51659	731	QKLQMILKDYAKL**	Q8ND56	174	TQDTRSLKTQLSQGR
O43747	29	EEREMIQKECAAIRS	P51659	81	DSVEEGEKVVKTALD	Q8ND56	291	IRRDGPMKFEKDFDF
O43747	322	RFLLNNDKNIRYVAL	P51665	100	GWYHTGPKLHKNDIA	Q8ND76	312	ISRLCEDKYKDLRRS
O43747	78	LKLIASQKFTDKRIG	P51665	113	IAINELMKRYCPNSV	Q8ND82	126	VTVENASKPDFTKNS
O43747	797	QQLRMRIKLTYNHKG	P51665	180	EHLLRDIKDTTVGTL	Q8ND82	253	FNLLDPLKYHMKHCC
O43765	103	TEGNEQMKVENFEAA	P51665	199	TNQVHGLKGLNSKLL	Q8ND82	282	ERPCDEDKTDSETGK
O43765	137	NRAAAYSKLGNYAGA	P51665	204	GLKGLNSKLLDIRSY	Q8ND82	323	FKCFSCSKVLKNNIR
O43765	160	CIDPAYSKAYGRMGL	P51665	214	DIRSYLEKVATGKLP	Q8ND82	564	ASRSKTSKLHATTST
O43765	184	EAVAYYKKALELDPD	P51665	279	LHNLINNKIANRDAE	Q8ND82	75	SSSSKGIKSEPHSPG
O43765	200	ETYKSNLKIAELKLR	P51665	45	VLLGSWQKKVLDVSN	Q8ND83	309	SVSLSSGKKGTCSDQ
O43765	95	SAEAERLKTEGNEQM	P51668	144	HAREWTQKYAM****	Q8NDD1	185	FGITGYGKGKERILE
O43766	318	QPTRRHLKVEEYITP	P51687	279	MTQVKEVKGLEWRTG	Q8NDD1	219	KVLQEQIKEKKAAKE
O43768	114	KSSLVTSKLAGGQVE	P51784	245	EDTRLWAKNSEGSLD	Q8NDD1	271	GRIGQVGKFKNGTLI
O43768	40	EEAKLKAKYPSLGQK	P51784	531	DLCVALSKHTGISPE	Q8NDD1	285	ILSPVDIKKINSSRV
O43768	47	KYPSLGQKPGGSDFL	P51790	750	AESPRPLKLRSILDM	Q8NDF8	210	VADEDSVKVLDKATV
O43768	63	KRLQKGQKYFDSGDY	P51812	364	FDPEFTAKTPKDSPG	Q8NDM7	1205	QAFDEHLKRLFERRV
O43768	74	SGDYNMAKAKMKNKQ	P51812	541	GVVHRDLKPSNILYV	Q8NDT2	408	VIGRNPIKIGYGKAN
O43768	89	LPSAGPDKNLVTGDH	P51812	566	ICDFGFAKQLRAENG	Q8NDT2	46	HKASGGAKHPVPARA
O43772	244	FQTAPPGKYPNGFRD	P51812	591	FVAPEVLKRQGYDAA	Q8NDT2	759	KDHTSGSKLTQLKIA
O43776	104	EAKKITIKNDPSLPE	P51812	62	HVKEGHEKADPSQFE	Q8NDT2	829	RNLVSYLKQKQAAGV
O43776	129	GYRGQRVKVFGWVHR	P51816	457	ELYQAVEKAKPRNNP	Q8NDV3	234	QLYHNEKKIHLLNTK
O43776	244	IRGENMSKILKARSM	P51816	694	NIPLAPEKKKYRGPG	Q8NDV3	241	KIHLLNTKLEHVNRD
O43776	490	EEILAGYKREGIDPT	P51816	702	KKYRGPGKIVPKSRE	Q8NDV3	252	VNRDLSVKRESLSHH
O43776	50	TIYVDSQKENERWNV	P51816	953	TGQITSTKPKRTEGK	Q8NDV3	294	VETLLNQKRPQYIKA
O43776	507	YWYTDQRKYGTCPHG	P51816	960	KPKRTEGKFCATFKG	Q8NDV3	495	GIDTHEGKRQQKRAE
O43776	60	ERWNVISKSQLKNIK	P51816	966	GKFCATFKGISVNEG	Q8NDX1	761	QPSLPAGKMSKPFLQ
O43776	64	VISKSQLKNIKKMWH	P51825	256	LAVKVHDKETPQDSL	Q8NDX5	222	NLTLRSQKLGVLSSS
O43795	100	RSLRDQDKDQCILIT	P51825	384	PSTAEPSKFPFPTKD	Q8NDX5	256	KTTVTSSKISQRDPS
O43795	1109	RQDKVCVKFIQGNQK	P51825	403	SSVTQNQKQYDTSSK	Q8NDX5	732	LLIEQPVKKRPLLDN
O43795	287	KLGNIEFKPESRVNG	P51825	560	SQEHSESKDPPPKSS	Q8NDX6	155	KRVHSGEKPYQCERC
O43795	68	LPIYSPEKVEEYRNR	P51825	582	PEAPHPGKRSCQKSP	Q8NDX6	24	LVPTAASKKMMLSQI
O43795	972	GAYLEINKNPKYKKL	P51825	603	QRQTVGTKQPKKPVK	Q8NDX6	25	VPTAASKKMMLSQIA
O43808	130	WVVNTRLKLQGAKFR	P51825	660	AAASNEPKPAVPPSS	Q8NDX6	34	MLSQIASKQAENGER
O43809	122	EDEVEGLKRLMTEIL	P51825	681	SSLPAPSKALSGPEP	Q8NDX6	78	LSEASHSKKTVKKVV
O43809	189	KALFAVPKNYKLVAA	P51825	789	RQRKAEDKQPPAGKK	Q8NDZ2	550	KTVEWDWKLLTYVME
O43809	23	GVTQFGNKYIQQTKP	P51825	809	RSSDSSSKLAKKRKG	Q8NE09	518	VTHSASTKYASAELK
O43809	29	NKYIQQTKPLTLERT	P51825	831	NKKIRLEKEIKSQSS	Q8NE22	111	HQQQSTFKPEEILYK
O43809	56	TKEPLYEKDSSVAAR	P51825	98	KYPLIPDKGSSIPSS	Q8NE62	317	IGNADDLKKLGIPVV
O43809	73	RMREEFDKIGMRRTV	P51826	271	YRGVPASKPEPARAK	Q8NE62	496	GSHIQSDKEIDAFVR
O43813	101	QSLNCLTKRSITFLC	P51826	538	QRPRTANKAPGSKGV	Q8NE71	174	EEQQPALKGKKGKEE
O43813	128	YHKMNNEKQAEDCIT	P51826	543	ANKAPGSKGVKQKSP	Q8NE71	305	LENASDIKLEKFSIS
O43813	142	TRLIHLNKIDPHAPN	P51828	422	HITEATLKHLDKAYE	Q8NE71	347	KGKTTLLKHIANRAL
O43813	15	NPYADYNKSLAEGYF	P51828	426	ATLKHLDKAYEVEDG	Q8NE71	451	MQNRPTQKFSGGWRM
O43813	245	GKLHSLVKPSVDYVC	P51857	71	VGEAIREKIAEGKVR	Q8NE71	50	EELAVEDKQAGEEEK
O43815	103	KDLVRRIKMLEYALK	P51858	105	SGYQSSQKKSCVEEP	Q8NE71	589	KQQKCRRKNQDEESQ
O43815	456	LRKTWNPKFTLRSHF	P51858	125	AAEGDGDKKGNAEGS	Q8NE71	742	AHTIQICKLSGGQKA
O43815	689	AHEDRHIKFYDNNTG	P51858	146	LVIDEPAKEKNEKGA	Q8NE71	95	VDDDGEEKELMERLK
O43818	113	DQVAGRLKEDVLEQR	P51858	151	PAKEKNEKGALKRRA	Q8NE86	199	IEQHQLNKERELIER
O43818	12	AAARKRGKPASGAGA	P51858	167	DLLEDSPKRPKEAEN	Q8NE86	211	IERLEDLKEQLAPLE
O43818	129	RLQKLVAKEIQAPAS	P51858	180	ENPEGEEKEAATLEV	Q8NE86	219	EQLAPLEKVRIEISR
O43818	172	AKDCSIIKWSVESGR	P51858	19	CGDLVFAKMKGYPHW	Q8NE86	316	KSRFDLEKYNQLKDA
O43818	25	GAGAGAGKRRRKADS	P51858	197	PLPMEVEKNSTPSEP	Q8NE86	332	AQAEMDLKRLRDPLQ
O43818	40	AGDRGKSKGGGKMNE	P51858	226	DEEEEATKEDAEAPG	Q8NEB7	347	TPTAKAWKYMEEEIL
O43818	62	SESLAPRKPEEEEEE	P51858	39	EMPEAAVKSTANKYQ	Q8NEB7	381	LCDFCSLKLEQCHSE
O43818	78	LEETAQEKKLRLAKL	P51858	44	AVKSTANKYQVFFFG	Q8NEB7	491	YPNYCSFKSQQCLMR
O43818	84	EKKLRLAKLYLEQLR	P51858	70	LFPYEESKEKFGKPN	Q8NEB9	132	TTVSLFGKYGMFRQG
O43822	120	RTLPRLQKLDNQAVT	P51858	72	PYEESKEKFGKPNKR	Q8NEB9	557	DRLVHLMKAVQRESG
O43823	396	QFACSVCKFRSFDDE	P51858	80	FGKPNKRKGFSEGLW	Q8NEF9	124	KAAVQAFKEARQNVA
O43823	428	ISTKLPDKTVEFLQE	P51884	226	NIPDEYFKRFNALQY	Q8NEF9	178	KETKILAKKPIHNSK
O43823	524	KTSLHVAKSVLNNRH	P51884	292	QLEKFDIKSFCKILG	Q8NEF9	206	TIANSPSKPSEKDSV
O43823	534	LNNRHIVKMLEKYLK	P51911	25	VKNKLAQKYDHQREQ	Q8NEF9	423	NIAVFQGKKITFDD*
O43823	538	HIVKMLEKYLKGEDP	P51946	274	SEEVAVLKQKLERCH	Q8NEG2	178	RLPAIDSKYLSKAGT
O43823	637	PCGTAHEKGVPKARS	P51946	305	EDDDYVSKKSKHEEE	Q8NEG2	222	KLISNGYKDEWLQQQ
O43823	686	EQTDAESKDAVPTE*	P51948	219	LEKPKPVKPVTFSTG	Q8NEH6	333	EEQAEIYKSKLKEEA
O43823	95	NSDSLIAKINQRLDM	P51957	576	PSHPIVGKVDVTSTQ	Q8NEH6	335	QAEIYKSKLKEEAEK
O43829	122	LGIRFLDKLCSQKRD	P51965	136	VICLDILKDNWSPAL	Q8NEJ9	105	KLRPLDQKLKYQIDK
O43829	284	IACQACGKTFSDEGR	P51965	43	VSMSKNSKLLSTSAK	Q8NEJ9	112	KLKYQIDKLIKTAVT
O43837	105	EQVLSSMKENKVAII	P51965	50	KLLSTSAKRIQKELA	Q8NEJ9	33	MAVTAQVKSLTQKVQ
O43837	114	NKVAIIGKIHTPMEY	P51970	114	FDECVLDKLGWVRPD	Q8NEM7	294	GNCVDMWKRSPCNLA
O43837	122	IHTPMEYKGELASYD	P51970	38	HYGAQCDKPNKEFML	Q8NEM7	467	KHRPPPIKLPSSSGN
O43837	135	YDMRLRRKLDLFANV	P51970	41	AQCDKPNKEFMLCRW	Q8NEM7	500	PTPPPSSKPSSIPRK
O43837	146	FANVVHVKSLPGYMT	P51970	51	MLCRWEEKDPRRCLE	Q8NER1	161	TGKTCLLKAMLNLHD
O43837	199	AKSQRIAKFAFDYAT	P51970	61	RRCLEEGKLVNKCAL	Q8NEU8	406	TPITSFGKKQESSCP
O43837	207	FAFDYATKKGRGKVT	P51970	65	EEGKLVNKCALDFFR	Q8NEV8	973	PFRNERGKGKIRHHI
O43837	218	GKVTAVHKANIMKLG	P51991	118	VSREDSVKPGAHLTV	Q8NEY8	180	VRPGASYKRQNEGNP
O43837	242	EVAELYPKIKFETMI	P51991	126	PGAHLTVKKIFVGGI	Q8NEY8	216	GSAVSSSKVLDKPSR
O43837	350	SMIADAVKKVIKVGK	P51991	134	KIFVGGIKEDTEEYN	Q8NEY8	220	SSSKVLDKPSRLTEK
O43837	374	STTTDFIKSVIGHLQ	P51991	148	NLRDYFEKYGKIETI	Q8NEY8	227	KPSRLTEKELAEAAS
O43837	68	PELMHAVKEVFKAAA	P51991	151	DYFEKYGKIETIEVM	Q8NEY8	235	ELAEAASKWAAEKLE
O43837	96	QNMASEEKLEQVLSS	P51991	182	DDHDTVDKIVVQKYH	Q8NEY8	240	ASKWAAEKLEKSDES
O43847	1024	VTALIKLKECEDTHL	P51991	187	VDKIVVQKYHTINGH	Q8NEY8	322	VVKMLIEKDPSLEKS
O43847	455	QQQHYRVKPLHYISW	P51991	199	NGHNCEVKKALSKQE	Q8NEY8	37	LVNIVPKKPPLLDRP
O43847	681	PETEYPVKIVNTPQG	P51991	29	GEEGHDPKEPEQLRK	Q8NEZ2	293	LEPSLEAKRQTVLDK
O43847	693	PQGCLWYKKDNKFKI	P51991	4	****MEVKPPPGRPQ	Q8NEZ4	1508	TDGAILGKLYKIPEL
O43847	992	YNSEVVDKKIEEFLS	P51991	57	SLREHFEKWGTLTDC	Q8NEZ4	1717	QMSNDSMKRQQQQDS
O43852	165	RRFKMADKDGDLIAT	P51991	73	VMRDPQTKRSRGFGF	Q8NEZ4	1752	SEHEQEWKFRQQMRQ
O43852	255	KMDKEETKDWILPSD	P51991	99	AMCARPHKVDGRVVE	Q8NEZ4	1766	QKSKQQAKIEATQKL
O43852	79	RLGKIVSKIDGDKDG	P52209	154	KEAWPHIKTIFQGIA	Q8NEZ4	1772	AKIEATQKLEQVKNE
O43852	98	DELKDWIKFAQKRWI	P52209	163	IFQGIAAKVGTGEPC	Q8NEZ4	1849	SSDDVFVKPQAPPPP
O43865	100	EKQQTNSKGSSNFCV	P52209	248	KFQDTDGKHLLPKIR	Q8NEZ4	1965	TNNDPYAKPPDTPRP
O43865	108	GSSNFCVKNIKQAEF	P52209	294	ARCLSSLKDERIQAS	Q8NEZ4	1996	VVSEQTAKGPIAAGT
O43865	111	NFCVKNIKQAEFGRR	P52209	309	KKLKGPQKFQFDGDK	Q8NEZ4	2009	GTSDHFTKPSPRADV
O43865	141	RKRAQGEKPLAGAKI	P52209	316	KFQFDGDKKSFLEDI	Q8NEZ4	2398	ILQQQQQKKIAGRQE
O43865	239	DLTHWVYKKYPNVFK	P52209	317	FQFDGDKKSFLEDIR	Q8NEZ4	2697	DSDDPSVKELDVKDL
O43865	240	LTHWVYKKYPNVFKK	P52209	375	IRSVFLGKIKDAFDR	Q8NEZ4	2769	PELDMGDKKSMFNEE
O43865	246	KKYPNVFKKIRGIVE	P52209	38	AFNRTVSKVDDFLAN	Q8NEZ4	2770	ELDMGDKKSMFNEEL
O43865	267	HRLYQLSKAGKLCVP	P52209	59	VVGAQSLKEMVSKLK	Q8NEZ4	2784	LDLPIDDKLDNQCVS
O43865	27	KEIEDAEKYSFMATV	P52209	76	RRIILLVKAGQAVDD	Q8NEZ4	2795	QCVSVEPKKKEQENK
O43865	270	YQLSKAGKLCVPAMN	P52209	87	AVDDFIEKLVPLLDT	Q8NEZ4	2802	KKKEQENKTLVLSDK
O43865	286	NDSVTKQKFDNLYCC	P52272	110	LLMDAEGKSRGCAVV	Q8NEZ4	2809	KTLVLSDKHSPQKKS
O43865	359	MDGFRVVKLNEVIRQ	P52272	120	GCAVVEFKMEESMKK	Q8NEZ4	2814	SDKHSPQKKSTVTNE
O43865	36	SFMATVTKAPKKQIQ	P52272	126	FKMEESMKKAAEVLN	Q8NEZ4	2815	DKHSPQKKSTVTNEV
O43865	40	TVTKAPKKQIQFADD	P52272	134	KAAEVLNKHSLSGRP	Q8NEZ4	2823	STVTNEVKTEVLSPN
O43865	478	NAPEGRYKQDVYLLP	P52272	143	SLSGRPLKVKEDPDG	Q8NEZ4	2832	EVLSPNSKVESKCET
O43918	114	SQPRKGRKPPAVPKA	P52272	145	SGRPLKVKEDPDGEH	Q8NEZ4	2836	PNSKVESKCETEKND
O43918	120	RKPPAVPKALVPPPR	P52272	221	KVGWKKLKEVFSMAG	Q8NEZ4	2841	ESKCETEKNDENKDN
O43918	131	PPPRLPTKRKASEEA	P52272	239	RADILEDKDGKSRGI	Q8NEZ4	2880	CDPDLFEKRTNRETA
O43918	159	ASPGSQLKAKPPKKP	P52272	242	ILEDKDGKSRGIGTV	Q8NEZ4	3105	KAKMVALKGINKVMA
O43918	164	QLKAKPPKKPESSAE	P52272	277	FDRPMHVKMDERALP	Q8NEZ4	3215	SKKALSAKQRTAKKA
O43918	165	LKAKPPKKPESSAEQ	P52272	37	GNGAPGPKGEGERPA	Q8NEZ4	3706	YANSEVDKLSMETPA
O43918	221	VFESGGSKKCIQVGG	P52272	381	EILSNALKRGEIIAK	Q8NEZ4	3714	LSMETPAKTEEIKLE
O43918	222	FESGGSKKCIQVGGE	P52272	388	KRGEIIAKQGGGGGG	Q8NEZ4	3778	DSGNELLKHLLKNKK
O43918	243	FEDSGSGKNKARSSS	P52272	48	ERPAQNEKRKEKNIK	Q8NEZ4	3793	SSSLLNQKPEGSICS
O43918	245	DSGSGKNKARSSSGP	P52272	667	LPFDFTWKMLKDKFN	Q8NEZ4	3860	RTQRTGEKAAPRSKK
O43918	253	ARSSSGPKPLVRAKG	P52272	670	DFTWKMLKDKFNECG	Q8NEZ4	3929	TTEELAGKAGVLVSH
O43918	259	PKPLVRAKGAQGAAP	P52272	672	TWKMLKDKFNECGHV	Q8NEZ4	3945	VTKTLGPKPFQLPFR
O43920	28	QSGEQPYKMAGRCHA	P52272	685	HVLYADIKMENGKSK	Q8NEZ4	758	DVSYQGGKSIKLSSE
O43924	79	EKFRLEQKVYFKGQC	P52272	69	EPYANPTKRYRAFIT	Q8NEZ4	827	TPKIGMGKPAITKRK
O43929	231	PQYVKIFKEQLSLPA	P52272	698	SKGCGVVKFESPEVA	Q8NEZ4	870	SEGREIFKPRQLPGS
O43929	417	QIMNALQKYPNCPTD	P52272	716	CRMMNGMKLSGREID	Q8NEZ4	893	RGSGFPGKRRPRGAG
O60216	330	KLIVDSVKELDSKTI	P52272	83	TNIPFDVKWQSLKDL	Q8NEZ5	194	IQPFHFIKDPKNLTL
O60216	387	LWNNRLLKLFTRCLT	P52272	88	DVKWQSLKDLVKEKV	Q8NEZ5	40	VLTFLPAKALLRVAC
O60216	477	PPPPQGVKRKAGQID	P52292	108	RKLLSREKQPPIDNI	Q8NF37	221	RTCLITFKPGAFIPG
O60216	573	GLQRALAKTGAESIS	P52292	123	IRAGLIPKFVSFLGR	Q8NF50	1414	QANEKLDKTKAELDQ
O60216	596	NRKQAAAKFYSFLVL	P52292	22	HRFKNKGKDSTEMRR	Q8NF64	555	SVLQGLLKKRLLPAE
O60216	604	FYSFLVLKKQQAIEL	P52292	291	ERIGMVVKTGVVPQL	Q8NF86	24	AAGTQGRKSAACGQP
O60216	72	RIYHRKAKYLLADCN	P52292	353	NPKTNIQKEATWTMS	Q8NF91	3481	RAIQERAKEAVTKSE
O60216	86	NEAFIKIKMAFRPGV	P52292	392	VLSKADFKTQKEAVW	Q8NF91	5316	EKVKTNGKLVKQELK
O60218	125	SGDDLFPKDDKGNAI	P52294	105	QQLSATQKFRKLLSK	Q8NF91	7861	EIEYKLGKVNDRWQH
O60218	179	NKPGLKYKPVTNQVE	P52294	136	ARFVEFLKRKENCTL	Q8NF91	791	EMFATMSKLKEQLTK
O60218	222	SPDRPWAKPEDPSLL	P52294	459	RLGEQEAKRNGTGIN	Q8NFA0	705	LVIEVRNKDMSWPEE
O60218	263	RNVIVIPKSVTPARI	P52294	6	**MTTPGKENFRLKS	Q8NFC6	1357	FTVDTPAKASITSKR
O60218	27	TWKSPLGKVKEAVKV	P52298	120	TDWDAGFKEGRQYGR	Q8NFC6	1363	AKASITSKRHIPEAH
O60218	69	KIQEKAVKREDLFIV	P52298	151	AGRGGYGKLAQNQ**	Q8NFC6	1389	VIMPLGSKLTGVIVE
O60218	95	LVRKAFEKTLKDLKL	P52298	34	GDNEEQEKLLKKSCT	Q8NFC6	1450	VVGLNTEKYAETVKL
O60231	143	EEEEASEKGKKKTGG	P52298	37	EEQEKLLKKSCTLYV	Q8NFC6	1514	TGPRRAEKTSVATST
O60231	202	NVLERSDKKAYEEAQ	P52298	75	KIIMGLDKMKKTACG	Q8NFC6	1942	SGTEKGSKDTDICSS
O60231	203	VLERSDKKAYEEAQK	P52306	12	SDTLKKLKITAVDKT	Q8NFC6	2430	PSAVCAEKEEKHGKE
O60231	210	KAYEEAQKRLKMAEE	P52306	230	NIAEELVKLFKKQIE	Q8NFC6	249	TTDTSTDKERTSEDM
O60231	340	RLGAASLKFGARDAA	P52306	421	EMPPVQFKLLGTLRM	Q8NFC6	2517	QTSGQTAKDPSVSIR
O60231	733	AGRVAAGKCFRLYTA	P52306	457	LVEWCEAKDHAGVMG	Q8NFC6	2569	NLKTSTTKCITGQES
O60231	78	PRKAVVEKPARAAER	P52306	484	SKSKDVIKTIVQSGG	Q8NFC6	2612	IKNDYSGKWTDQASA
O60231	860	IFYRPKDKVVHADNA	P52434	20	KDIDPEGKKFDRVSR	Q8NFC6	2735	IHSESYNKGEISSGR
O60234	119	VQTAELTKVFEIRTT	P52435	37	ACLFTINKEDHTLGN	Q8NFC6	2910	EQSPSSSKLKVMQTD
O60234	35	DNAAIIMKVDKDRQM	P52435	62	QVLFAGYKVPHPLEH	Q8NFC6	3047	RVEEAPVKKAKR***
O60234	74	RFVVYSYKYVHDDGR	P52435	70	VPHPLEHKIIIRVQT	Q8NFC6	473	VRHAYVHKPYLYSKY
O60237	10	ELEHLGGKRAESARM	P52564	14	KKRNPGLKIPKEAFE	Q8NFC6	616	KEKISSSKELKHVHA
O60237	960	MKVLTELKSDNQRLK	P52564	210	YLVDSVAKTIDAGCK	Q8NFC6	701	KSTLKNEKHLKKDDS
O60244	111	KWANNAGKVEKCAMI	P52565	105	KKQSFVLKEGVEYRI	Q8NFC6	738	EKTPSEDKLSVKHKY
O60244	176	LPTCIRDKIIPPDPI	P52565	127	REIVSGMKYIQHTYR	Q8NFC6	764	TELHSSEKGLKVEEN
O60244	360	SVHKVTIKIDENDVS	P52565	138	HTYRKGVKIDKTDYM	Q8NFC6	804	RKLSVLGKDGKPVSE
O60244	615	TRTNAKRKLSDDPCP	P52565	141	RKGVKIDKTDYMVGS	Q8NFC6	81	CLADVDTKPAYQNLR
O60244	626	DPCPVESKKTKRAGE	P52565	167	TPVEEAPKGMLARGS	Q8NFD5	1016	SKLPLPLKADGKEEG
O60256	115	IPYFPYSKQCKMRKR	P52565	178	ARGSYSIKSRFTDDD	Q8NFD5	1020	LPLKADGKEEGTPQP
O60256	251	PMLIPKEKPPITVVG	P52565	28	DEHSVNYKPPAQKSI	Q8NFD5	1043	SSTTTGEKITKVYEL
O60256	48	RLGVEMGKVQVYQEP	P52565	43	QEIQELDKDDESLRK	Q8NFD5	1082	SSLPAVGKKPLDLFR
O60264	112	FIQPAAQKTPTSPLK	P52565	52	DESLRKYKEALLGRV	Q8NFD5	1566	SPFLPSMKMQKVMPT
O60264	129	PGRPRIKKDEKQNLL	P52566	102	KKETIVLKEGSEYRV	Q8NFD5	1569	LPSMKMQKVMPTVPT
O60264	160	ELLTESSKATNVCTR	P52566	114	YRVKIHFKVNRDIVS	Q8NFD5	1616	QRRKITSKDIVTPEA
O60264	176	EDSPSYVKWGKLRDY	P52566	124	RDIVSGLKYVQHTYR	Q8NFD5	1770	EKPKQASKFDKLPIK
O60264	223	ISLLGYMKHYRNIPG	P52566	135	HTYRTGVKVDKATFM	Q8NFD5	1773	KQASKFDKLPIKIVK
O60264	238	PHMVLVPKSTLHNWM	P52566	138	RTGVKVDKATFMVGS	Q8NFD5	1777	KFDKLPIKIVKKNNL
O60264	249	HNWMSEFKRWVPTLR	P52566	175	ARGTYHNKSFFTDDD	Q8NFD5	181	PGPPLLSKPGDEDDA
O60264	264	SVCLIGDKEQRAAFV	P52566	196	WEWNLSIKKEWTE**	Q8NFD5	1898	PFGIQQAKSHRNIKL
O60264	319	RIKNEKSKLSEIVRE	P52566	21	DDDELDSKLNYKPPP	Q8NFD5	1904	AKSHRNIKLLEDEPR
O60264	430	WYTRILMKDIDILNS	P52566	25	LDSKLNYKPPPQKSL	Q8NFD5	68	TGLLPNHKLKTVGEA
O60264	440	DILNSAGKMDKMRLL	P52566	30	NYKPPPQKSLKELQE	Q8NFH4	114	FTSDLQDKNEYKVLE
O60264	600	AHRIGQTKTVRVFRF	P52566	33	PPPQKSLKELQEMDK	Q8NFH5	241	ESIMIGVKPCIDKSV
O60264	647	QNLNKIGKDEMLQMI	P52566	4	****MTEKAPEPHVE	Q8NFH5	246	GVKPCIDKSVMESSD
O60264	665	ATHVFASKESEITDE	P52566	40	KELQEMDKDDESLIK	Q8NFH5	83	QPVVPAHKDKSGAPP
O60264	691	KTAEMNEKLSKMGES	P52566	47	KDDESLIKYKKTLLG	Q8NFJ5	285	PVEDAFCKPQLVKKS
O60264	694	EMNEKLSKMGESSLR	P52566	63	GPVVTDPKAPNVVVT	Q8NFP7	133	IKVLQCHKPVHAEYL
O60264	71	DASPGKQKEIQEPDP	P52566	95	TGDLEALKKETIVLK	Q8NFQ8	80	PDEANVGKHPKDKTE
O60264	735	TEWIEPPKRERKANY	P52594	158	TSSTPEVKPLKSLLG	Q8NFT6	135	SHPRPSRKPVDSVPL
O60264	767	PKAPRPPKQPNVQDF	P52594	175	APTLHLNKGTPSQSP	Q8NFU3	83	VFFCQMGKRGLQATQ
O60264	799	YRKTIGYKVPRNPEL	P52594	313	QTASAVSKVSTNKAG	Q8NFU5	232	AVAASIQKIEKILQW
O60264	814	PNAAQAQKEEQLKID	P52594	326	AGLQTADKYAALANL	Q8NFU5	312	KIESSVGKSLSKMYA
O60264	819	AQKEEQLKIDEAESL	P52597	167	ASQELAEKALGKHKE	Q8NFU7	48	VKTLSPGKLKQLIQE
O60264	834	NDEELEEKEKLLTQG	P52597	185	HRYIEVFKSSQEEVR	Q8NFV4	87	TNFNSIAKILAQQTG
O60264	847	QGFTNWNKRDFNQFI	P52597	200	SYSDPPLKFMSVQRP	Q8NFW8	200	PLNLNPAKRPRRQDW
O60264	855	RDFNQFIKANEKWGR	P52597	224	RRYIGIVKQAGLERM	Q8NFW8	26	PSRGRPPKLQRNSRG
O60264	859	QFIKANEKWGRDDIE	P52597	87	HRYIEVFKSHRTEMD	Q8NFW8	269	LRYGYFGKEKLKEIK
O60264	929	DTKIGRYKAPFHQLR	P52597	98	TEMDWVLKHSGPNSA	Q8NFW8	338	KQTLSSLKLDCKMEV
O60264	945	SYGTNKGKNYTEEED	P52630	182	FRYKIQAKGKTPSLD	Q8NFW8	382	VSDEECLKRVGLSGA
O60264	966	LHKLGFDKENVYDEL	P52630	184	YKIQAKGKTPSLDPH	Q8NFW8	406	KAVGYICKCNGGRGA
O60264	990	FRFDWFLKSRTAMEL	P52630	194	SLDPHQTKEQKILQE	Q8NFW8	41	GQGRGVEKPPHLAAL
O60271	1080	PKAMKIEKSFDAHPR	P52630	197	PHQTKEQKILQETLN	Q8NFW8	427	HICLLMEKVNNSCQK
O60271	310	KVTDAPNKSEISKHI	P52630	375	PQLQGFRKFNILTSN	Q8NFW8	6	**MDSVEKGAATSVS
O60281	1117	NSSQSIGKHMKTAHP	P52630	384	NILTSNQKTLTPEKG	Q8NFW8	64	GIPLKNIKHLAGVPL
O60281	1342	AQQSAPEKVKKDRGR	P52630	390	QKTLTPEKGQSQGLI	Q8NFY9	177	RSKEYIRKKFLCVTK
O60281	1374	PAIIRDGKFICSRCY	P52630	415	QRSGGSGKGSNKGPL	Q8NFY9	178	SKEYIRKKFLCVTKE
O60281	2042	NVAVIPEKQLVEKKS	P52630	419	GSGKGSNKGPLGVTE	Q8NFZ0	427	CTQATKVKEEPSVWP
O60281	2546	VSQNKKRKVEKAEPA	P52630	592	QERRLLKKTMSGTFL	Q8NG27	212	SQSSSEGKLATKGDS
O60281	2633	NSRKNIDKTAVTSGN	P52655	12	ANTNTVPKLYRSVIE	Q8NG31	1069	LSKSATCKNIKDVQS
O60281	2695	MKPTVSLKKLEVHSN	P52655	49	LKTLWENKLMQSRAV	Q8NG31	1087	LNEPLSSKSQRRKSL
O60281	604	KERLAAMKPLRRLGR	P52701	1009	GCKRYWTKTIEKKLA	Q8NG31	1097	RRKSLKLKNDKTIVF
O60281	674	PEVIPVQKPVPVNEF	P52701	1030	ERRDVSLKDCMRRLF	Q8NG31	1100	SLKLKNDKTIVFSEN
O60282	167	KNRVPYVKGCTERFV	P52701	1296	FIKGACPKSYGFNAA	Q8NG31	1214	KILEENPKFGIGKGK
O60282	238	VDLAGSEKVSKTGAE	P52701	149	WVSKRLLKPYTGSKS	Q8NG31	1240	CVQEIAEKQALAVGN
O60282	593	MARLYISKMKSEVKS	P52701	155	LKPYTGSKSKEAQKG	Q8NG31	1285	MDEKVIGKVVDQACT
O60282	639	LISQHEAKIKSLTDY	P52701	169	GGHFYSAKPEILRAM	Q8NG31	1295	DQACTLEKAQVESCQ
O60282	864	DLRCELPKLEKRLRA	P52701	22	PALSDANKASARASR	Q8NG31	1530	EWFAAACKKELKENI
O60287	1356	LHTPSSHKRWIVADS	P52701	504	RKMAHISKYDRVVRR	Q8NG31	199	LDNPISEKSTKIDTT
O60287	1432	VDPGDWQKFVKKGLK	P52701	70	SASPPKAKNLNGGLR	Q8NG31	408	LSINSADKIHITRSH
O60287	176	CSHFDLNKKTLYTLV	P52701	771	TCHTPFGKRLLKQWL	Q8NG31	75	FQTESHMKIVRKSEM
O60287	1909	PSSQEPAKRLALHLV	P52701	852	YEETTYSKKKIIDFL	Q8NG31	757	SVLGQNSKLAEPLRK
O60287	23	ASSAGAAKRARKEEL	P52732	1045	TTEHLVTKSRLPLRA	Q8NG31	830	MNRQIAVKVEKCGKS
O60287	233	CIFSSGIKEDRISTI	P52732	146	TLHQIFEKLTDNGTE	Q8NG31	841	CGKSPIEKSGVLKSN
O60287	248	NILLSTLKTKVVHNK	P52732	362	RAKNILNKPEVNQKL	Q8NG31	861	LEDESVQKPKFPKEK
O60287	373	VCPDLLNKYFKEVTF	P52732	60	RTGGLADKSSRKTYT	Q8NG31	886	VGGPKIDKTIVFSED
O60291	259	EIYGIENKNNQETKP	P52732	715	TEDLKTIKQTHSQEL	Q8NG31	916	NHRPLLEKRDCHLVP
O60292	1448	VPKSFFSKQPVRNKH	P52732	908	TIKIGLTKLNCFLEQ	Q8NGJ2	310	KTKQIRDKVILLFSK
O60293	1066	KHTDTANKECINKLN	P52739	139	LEENTTGKNEAKKRK	Q8NGJ2	317	KVILLFSKGTG****
O60293	302	TFQAFELKPLRQKLT	P52739	325	SKKQRTGKKIHVCQY	Q8NGL9	302	AMRKLWSKKLITDDK
O60293	325	KKVKDGAKPLSLKSD	P52739	385	CQTGVGAKKGRKKLY	Q8NHH9	314	PSFDGRLKDIDEDFK
O60294	463	DNNTEDLKVTITKAG	P52739	57	AVLAACSKFFYKFFQ	Q8NHH9	321	KDIDEDFKRELRNLV
O60296	299	VDLQHKLKEHVIEKE	P52747	235	KSQQSGEKAFRCEYD	Q8NHH9	406	EQVCGGDKPYIAPSD
O60299	3	*****MAKLETLPVR	P52747	276	CEHAGCGKAFATGYG	Q8NHM5	588	AVGRPKGKLGPASAV
O60303	128	SSRTAPSKVQRRGWH	P52747	295	VRTHTGEKPYRCSED	Q8NHM5	596	LGPASAVKLAANRTT
O60306	1025	RSGLDRSKYLLVKEA	P52747	415	HVVHTHSKPYNCNHC	Q8NHM5	758	QKMNRDNKEGQEPAK
O60306	1030	RSKYLLVKEAKIIAM	P52756	189	FEDWLCNKCCLNNFR	Q8NHM5	765	KEGQEPAKRRSECEE
O60306	1045	TCTHAALKRHDLVKL	P52756	314	TIGVDFAKSARKDLV	Q8NHM5	860	QQQLKPGKEDKLFRK
O60306	1051	LKRHDLVKLGFKYDN	P52756	542	KTAQQIAKDMERWAK	Q8NHM5	884	DRMALANKPLRRFKQ
O60306	1111	IKNMAFQKYSNMEQS	P52756	711	RAAERREKYGIPEPP	Q8NHP6	11	NHAQNKAKLISETRR
O60306	1234	LTTYNGQKHLIRDII	P52756	749	DHSNIGNKMLQAMGW	Q8NHP6	143	YAKRENGKPVTVMFD
O60306	195	KKTPKLRKFWNLIKK	P52758	101	EIYKQYFKSNFPARA	Q8NHP7	456	QLLMVENKEDLKCTK
O60306	201	RKFWNLIKKNDEKMD	P52758	13	RRVISTAKAPGAIGP	Q8NHP7	460	VENKEDLKCTKQAVS
O60306	52	VIEDIYEKEIVKSRF	P52758	60	EEAKQALKNMGEILK	Q8NHQ9	228	VRVSVKEKGVAASSA
O60306	56	IYEKEIVKSRFAIRK	P52758	97	NTVNEIYKQYFKSNF	Q8NHQ9	237	VAASSAQKTPSRLEN
O60306	576	PTKPYGTKFDRRRPF	P52788	245	GDVLDNLKGDCYQVL	Q8NHQ9	254	MVCKADEKFNQLVHF
O60306	604	IQGMLDDKGRVIEDG	P52788	261	EDCIPVLKRYAKEGR	Q8NHQ9	406	NTADLLPKLKSMALA
O60306	667	KPKENNFKAVLETIR	P52789	346	ISDIEGEKDGIRKAR	Q8NHQ9	444	CNLIFRLKDLDFASL
O60313	228	ELLHTQLKYQRILER	P52789	418	GVDGSVYKKHPHFAK	Q8NHQ9	47	IPLFMRNKDVAAEAV
O60313	792	QCVHNETKNELEKML	P52789	638	EDVVTLLKEAIHRRE	Q8NHQ9	583	KGLLTTGKRTIKTVD
O60313	834	EVDPSLIKDTWHQVY	P52815	138	TVRLTEAKPVDKVKL	Q8NHS0	216	VEEDGQLKSVTVNGK
O60315	372	AITQLRNKLENGKPL	P52815	142	TEAKPVDKVKLIKEI	Q8NHS0	223	KSVTVNGKEQLKWMD
O60315	377	RNKLENGKPLSMSEQ	P52815	150	VKLIKEIKNYIQGIN	Q8NHS0	61	EVLSDSKKRSLYDRA
O60318	1241	QELQCFCKYLQRWRE	P52815	162	GINLVQAKKLVESLP	Q8NHU6	118	MPFFLEGKPKATLRQ
O60318	644	CLDMCPEKERYMRET	P52815	163	INLVQAKKLVESLPQ	Q8NHU6	886	KNLTDVIKKSMVDHT
O60318	781	INNENMTKCLQSLKE	P52815	173	ESLPQEIKANVAKAE	Q8NHV1	16	LRIVLVGKTGSGKSA
O60318	787	TKCLQSLKEMYQDLR	P52815	178	EIKANVAKAEAEKIK	Q8NHV4	239	ILYDTSSKKLVKTLV
O60341	268	LINFGIYKRIKPLPT	P52815	183	VAKAEAEKIKAALEA	Q8NHV4	65	KIVVSSCKCKPVPLL
O60341	276	RIKPLPTKKTGKVII	P52849	588	WQNPCDDKRHKDIWS	Q8NHZ8	68	INDRIGYKPQPKPNN
O60341	355	QVNMELAKIKQKCPL	P52849	591	PCDDKRHKDIWSKEK	Q8NI08	519	NIHEDLDKVKLIEYY
O60341	503	ELAETQGKLEEKLQE	P52888	165	RETQENIKRIKKKLS	Q8NI08	684	AMVQQYGKRRKQPEY
O60341	732	GRCLAILKGIFGSSA	P52888	2	******MKPPAACAG	Q8NI27	1007	VELVHQQKTPNFSTL
O60343	383	VVLEKNFKDISSCSQ	P52888	229	PHYFPLLKKCHVPET	Q8NI27	1062	SDRATYEKECGNYPG
O60343	477	GLYPPRAKLVIQRHL	P52888	249	EAFNCRCKEENCAIL	Q8NI27	1084	TGFDGGNKADQLDYE
O60361	109	IHGSDSVKSAEKEIS	P52888	257	EENCAILKELVTLRA	Q8NI27	1099	NFRHVVHKWHYKLTK
O60361	16	IIKRFEQKGFRLVAM	P52888	538	VPRELLEKLIESRQA	Q8NI27	1103	VVHKWHYKLTKASVH
O60361	34	PASEEHLKQHYIDLK	P52888	628	DMFHTRFKQEGVLNS	Q8NI27	1106	KWHYKLTKASVHCLE
O60361	41	KQHYIDLKDRPFFPG	P52888	92	PQHVSPSKDIRTAST	Q8NI27	1189	PENEFHHKDPPPRNA
O60361	70	WEGLNVVKTGRVMLG	P52895	179	LLEMILNKPGLKYKP	Q8NI27	1229	SSTEETDKSRERSQC
O60361	85	ETNPADSKPGTIRGD	P52895	31	YAPAEVPKSKALEAV	Q8NI27	1239	ERSQCGVKAVNKASS
O60381	171	AFPHHHWKEETPVRH	P52895	4	****MDSKYQCVKLN	Q8NI27	1384	ENVKGGEKTPVSGSL
O60381	297	GLLTVECKLDHPFYV	P52907	118	EEADGGLKSWRESCD	Q8NI27	139	LESLGLIKQSQQFNQ
O60381	305	LDHPFYVKNKGWSSF	P52907	133	SALRAYVKDHYSNGF	Q8NI27	1392	TPVSGSLKSPVPRSD
O60381	307	HPFYVKNKGWSSFYP	P52907	19	EKVRIAAKFITHAPP	Q8NI27	1437	ELKESSAKLYINHTP
O60381	419	SLYAKAVKNHSSGTV	P52907	226	SNEAQTAKEFIKIIE	Q8NI27	147	QSQQFNQKSVKIKTK
O60397	33	NKVPEKQKLFQEDDG	P52907	97	PRNKISFKFDHLRKE	Q8NI27	154	KSVKIKTKLFYKQQK
O60422	368	RNPKPWSKLKSGRET	P52943	138	KKVYFAEKVTSLGKD	Q8NI27	158	IKTKLFYKQQKFNLL
O60423	326	CLEWNDKKYSLDIGN	P52943	17	KTVYFAEKVSSLGKD	Q8NI27	161	KLFYKQQKFNLLREE
O60437	12	FRKRNKGKYSPTVQT	P52943	205	YDRDPEGKVQP****	Q8NI27	18	EWIKNWEKSGRGEFL
O60437	1229	RGPQVEVKEVTKEVI	P52943	23	EKVSSLGKDWHKFCL	Q8NI27	253	HILGFKFKFYQEPNG
O60437	130	QIYRLAVKEVDPQVN	P52943	31	DWHKFCLKCERCSKT	Q8NI27	307	KREIAEAKQIVRKLT
O60476	297	KAVQLAEKLLPAFNT	P52943	79	AGSYIYEKPLAEGPQ	Q8NI27	415	PVNALQNKRAPKQAE
O60488	397	QEMNYIQKTLFKIGY	P52948	1019	RFSRLPSKADTSQEI	Q8NI27	528	YRLYGQWKNETYNSH
O60488	401	YIQKTLFKIGYDYKL	P52948	1040	ISASHSSKTRSLVGG	Q8NI27	540	NSHPLLVKVKAQTID
O60488	89	LFDHAVSKFGKKDSL	P52948	1052	VGGLLQSKFTSGAFL	Q8NI27	761	IFQEGGEKHLKLVGK
O60493	61	KTNLPIFKLKESTVR	P52948	1130	SVTYGKGKLLMDMAL	Q8NI27	829	YAHHISSKYDELKKS
O60499	131	AGKPAAQKSPSDLLD	P52948	1341	VFSYLTGKRISEACS	Q8NI27	848	KQQHKVHKYITSCEM
O60506	117	TKVADSSKGPDEAKI	P52948	1405	IFALLAGKPVWQLSE	Q8NI27	923	NQEMPPNKKKKEKER
O60506	123	SKGPDEAKIKALLER	P52948	1413	PVWQLSEKKQINVCS	Q8NI27	928	PNKKKKEKERCTALQ
O60506	168	GTEIFVGKIPRDLFE	P52948	1497	DVCFHLLKLYSDRHY	Q8NI27	937	RCTALQDKLLEEEKK
O60506	213	AFVTFCTKEAAQEAV	P52948	1601	ETPESWAKETFLTQK	Q8NI27	943	DKLLEEEKKQMEHVQ
O60506	221	EAAQEAVKLYNNHEI	P52948	1608	KETFLTQKLRVPAKW	Q8NI27	957	QRVLQRLKLEKDNWL
O60506	232	NHEIRSGKHIGVCIS	P52948	1614	QKLRVPAKWIHEAKA	Q8NI27	960	LQRLKLEKDNWLLAK
O60506	256	SIPKSKTKEQILEEF	P52948	1630	RAHMESDKHLEALCL	Q8NI27	970	WLLAKSTKNETITKF
O60506	282	LYHQPDDKKKNRGFC	P52948	1739	QIQCYSAKDRLAQSD	Q8NI35	1206	MKLPPPYKALTDDSD
O60506	283	YHQPDDKKKNRGFCF	P52948	185	VSTNISTKHQCITAM	Q8NI36	159	KEIVHTFKGHKAEIH
O60506	297	FLEYEDHKTAAQARR	P52948	193	HQCITAMKEYESKSL	Q8NI36	235	SLQLWNVKSNKLLYT
O60506	356	VTEEILEKAFSQFGK	P52948	542	PTNPAAQKALTTPTH	Q8NI36	238	LWNVKSNKLLYTFPG
O60506	363	KAFSQFGKLERVKKL	P52948	551	LTTPTHYKLTPRPAT	Q8NI36	284	KFNETLMKFRQDWGP
O60506	371	LERVKKLKDYAFIHF	P52948	572	LQTTGTAKSHLFDGL	Q8NI36	322	GLWDLEDKKLINQMR
O60506	42	LPQKVAEKLDEIYVA	P52948	599	MPKKSIKKLVLKNLN	Q8NI36	413	SFSTVHEKFNKSLGH
O60506	66	ERAIEALKEFNEDGA	P52948	603	SIKKLVLKNLNNSNL	Q8NI36	425	LGHGLINKKRVKRKG
O60506	81	LAVLQQFKDSDLSHV	P52948	639	ERFSFLSKPVDENHQ	Q8NI36	446	VRLPPITKFAAEEAR
O60508	314	CSMDCKIKLWEVYGE	P52948	665	FYTNPIAKPIPQTPE	Q8NI36	467	IIACHQGKLSCSTWN
O60508	47	LTKSPSSKPSLAVAV	P52948	757	LAKITNEKGECIVSD	Q8NI36	486	TIGAYFLKPKELKKD
O60508	541	IWDWKTTKLYSRFKA	P52948	831	DGVWPTDKTSRCLIK	Q8NI36	569	LLKFWNFKNKILIHS
O60518	961	EAVPLLVKVIKCANS	P52948	838	KTSRCLIKSPDRLAD	Q8NI36	571	KFWNFKNKILIHSVS
O60522	1493	ELSTQVIKSASSKSV	P52948	925	LQMALNGKPAPPPQS	Q8NI36	814	NNDPQQSKVVNLGVL
O60524	35	NVYDVDNKTYLIRLQ	P53004	219	PLSWIEEKGPGLKRN	Q8NI36	824	NLGVLAQKSDFCLKL
O60524	496	KTVEAAEKAFKSAEK	P53004	248	VPNVGVNKNIFLKDQ	Q8NI36	830	QKSDFCLKLEEGLVN
O60547	140	LRLLDAVKTCGLINS	P53004	253	VNKNIFLKDQNIFVQ	Q8NI36	839	EEGLVNNKYDTALNL
O60547	322	VHVTVDLKYYRPTEV	P53004	261	DQNIFVQKLLGQFSE	Q8NI77	57	EVSFFHGKKTTNQNV
O60547	338	FLQGDCTKAKQKLNW	P53004	269	LLGQFSEKELAAEKK	Q8TA86	118	YGHRTGDKECPFFIK
O60547	70	GRIEHLYKNPQAHIE	P53004	290	GLAEEIQKYCCSRK*	Q8TA86	129	FFIKGNQKLEQFRVA
O60547	81	AHIEGNMKLHYGDLT	P53007	149	PMETIKVKFIHDQTS	Q8TA86	54	HLESFYEKPPPGLIK
O60547	95	TDSTCLVKIINEVKP	P53007	160	DQTSPNPKYRGFFHG	Q8TAA5	142	DQKLTLEKVFRGLLL
O60551	254	INFLCVHKKLRSKRV	P53007	21	APASGKAKLTHPGKA	Q8TAD8	2	******MKAVKSERE
O60551	466	ENKTFLEKLKFGIGD	P53007	255	MQGLEAHKYRNTWDC	Q8TAD8	223	KEVPAKEKPSFELSG
O60563	33	RFGVDPDKELSYRQQ	P53007	268	DCGLQILKKEGLKAF	Q8TAD8	30	LPAGVVVKQERLSPE
O60563	376	SNAFISQKQNSKSVP	P53007	277	EGLKAFYKGTVPRLG	Q8TAD8	301	IDHPSCSKQHAVFQY
O60563	380	ISQKQNSKSVPSAKV	P53007	306	EVVKLLNKVWKTD**	Q8TAD8	325	GTVGRRVKPYIIDLG
O60563	386	SKSVPSAKVSLKEYR	P53007	97	LLYGSIPKAAVRFGM	Q8TAD8	5	***MKAVKSERERGS
O60563	390	PSAKVSLKEYRAKHA	P53041	111	ASNMALGKFRAALRD	Q8TAE8	59	LGPRYAAKQFARYGA
O60563	404	AEELAAQKRQLENME	P53041	135	HDKDAKMKYQECNKI	Q8TAF3	106	VKVWNAHKGFCMSTL
O60563	457	PFLEKADKTALKMRI	P53041	141	MKYQECNKIVKQKAF	Q8TAF3	121	RTHKDYVKALAYAKD
O60563	471	IPVAGGDKAASSKPE	P53041	26	PPADGALKRAEELKT	Q8TAF3	214	KGHTDNVKALLLNRD
O60563	476	GDKAASSKPEEIKMR	P53041	32	LKRAEELKTQANDYF	Q8TAF3	294	RVLICEEKAPVLKME
O60563	492	KVHAAADKHNSVEDS	P53041	40	TQANDYFKAKDYENA	Q8TAF3	323	TTKSTVNKWTLKGIH
O60563	638	KTRVPHSKLDKGPTG	P53041	93	TRAIELDKKYIKGYY	Q8TAF3	564	KNMPKFNKIPFYLQP
O60563	707	SRSGNTDKPRPPPLP	P53350	19	RAPADPGKAGVPGVA	Q8TAF3	578	PHASSGAKTLKKDRL
O60566	1040	KALWKVGKLTSPGAL	P53350	474	SHPNSLMKKITLLKY	Q8TAF3	663	TVKHFIWKSGGDLTL
O60566	250	IRVGGALKAPSQNRG	P53350	589	YARTMVDKLLSSRSA	Q8TAG9	591	LYGLSTFKDARHAAE
O60566	667	YSQTLSIKKLSPIIE	P53350	61	VRGRFLGKGGFAKCF	Q8TAK5	341	KKPRIGEKTNSVEES
O60568	645	LFPGYHTKARAVMNF	P53350	9	SAAVTAGKLARAPAD	Q8TAM2	184	LSRLNLTKYSQKPKL
O60573	134	DANKNGGKWIIRLRK	P53350	97	LKPHQREKMSMEISI	Q8TAP6	279	ERQKTAEKERLFLVY
O60573	239	LLFQNLWKPRLNVP*	P53365	139	LLRETKRKYESVLQL	Q8TAQ2	101	LAAAYKFKSDQGWRR
O60573	30	STQKDGEKEKTERDK	P53367	146	TRQIISEKLGRGSRT	Q8TAQ2	13	KDGGPNVKYYEAADT
O60583	493	IPIANTEKYMADKKE	P53384	275	PLDPLIGKNCDKGQS	Q8TAQ2	151	LCPEIEPKLLGKLKD
O60610	1057	VSAENLQKNLDQMKK	P53384	279	LIGKNCDKGQSFFID	Q8TAQ2	275	RRKKISAKTLTDEVN
O60610	1063	QKNLDQMKKQISDVE	P53384	63	KILVLSGKGGVGKST	Q8TAQ2	326	GPSTPYTKSKRGHRE
O60610	1083	FPAATDEKDKFVEKM	P53396	1077	IGHYLDQKRLKQGLY	Q8TAQ2	33	NVRLWLGKNYKKYIQ
O60610	1103	DAQEQYNKLRMMHSN	P53396	12	AISEQTGKELLYKFI	Q8TAQ2	359	VEEVTLPKTVNTKKD
O60610	1150	NMFLQAVKENQKRRE	P53396	148	DVGDVDAKAQKLLVG	Q8TAQ2	373	DSESAPVKGGTMTDL
O60610	1249	AMAAVPAKVSKNSET	P53396	151	DVDAKAQKLLVGVDE	Q8TAQ2	453	LPEFFNGKNKSKTPE
O60610	202	LKRLHDEKEETAGSY	P53396	159	LLVGVDEKLNPEDIK	Q8TAQ2	564	QMLNFPDKGKEKPTD
O60610	35	SAGGDGGKSKKFTLK	P53396	17	TGKELLYKFICTTSA	Q8TAQ2	568	FPDKGKEKPTDMQNF
O60610	37	GGDGGKSKKFTLKRL	P53396	230	ATADYICKVKWGDIE	Q8TAQ2	584	LRTDMYTKKNVPSKS
O60610	503	HELQVEMKKMESDFE	P53396	259	YIADLDAKSGASLKL	Q8TAQ2	704	LEEFSKMKEEVPTAL
O60610	520	LQDLQGEKDALHSEK	P53396	265	AKSGASLKLTLLNPK	Q8TAQ2	728	EAAKVTGKADPAFGL
O60610	527	KDALHSEKQQIATEK	P53396	369	RDYQGPLKEHEVTIF	Q8TAQ2	769	EGQATDEKKEPKEPR
O60610	771	PFGLTPKKLYKPEVQ	P53396	4	****MSAKAISEQTG	Q8TAQ2	787	GAIEEEAKEKTSEAP
O60610	800	SQDCFWTKVKEDRFE	P53396	468	ADEVAPAKKAKPAMP	Q8TAQ2	79	PLTKLPIKCFLDFKA
O60645	232	RIIEREEKIDRRILD	P53396	538	YPFTGDHKQKFYWGH	Q8TAQ2	872	ALAAAAVKAKHLAAV
O60645	39	QRPDQLDKVEQYRRR	P53396	540	FTGDHKQKFYWGHKE	Q8TAQ2	897	LLVETQMKKLEIKLR
O60664	122	EKVLADTKELVSSKV	P53396	546	QKFYWGHKEILIPVF	Q8TAQ2	99	HILAAAYKFKSDQGW
O60664	128	TKELVSSKVSGAQEM	P53396	554	EILIPVFKNMADAMR	Q8TAT6	179	TGGADKGKFVALENI
O60664	164	AVQSGVDKTKSVVTG	P53396	58	LSQNLVVKPDQLIKR	Q8TAT6	31	ETAATFLKKVAKEFG
O60664	257	AYEHSLGKLRATKQR	P53396	616	LIKKADQKGVTIIGP	Q8TAV0	297	AALSKSKKSEKSGAI
O60664	289	VKQGVDQKLVEGQEK	P53396	630	PATVGGIKPGCFKIG	Q8TAX0	160	VTKLSPEKKPTRGRL
O60664	314	KQLQGPEKEPPKPEQ	P53396	64	VKPDQLIKRRGKLGL	Q8TAX0	161	TKLSPEKKPTRGRLP
O60664	318	GPEKEPPKPEQVESR	P53396	68	QLIKRRGKLGLVGVN	Q8TAX0	172	GRLPSKTKKEFVCKF
O60664	65	TVCDAAEKGVRTLTA	P53396	86	DGVKSWLKPRLGQEA	Q8TB03	172	IMHSSEMKVSSTWLR
O60664	84	GAQPILSKLEPQIAS	P53396	944	GALDAAAKMFSKAFD	Q8TB03	304	DSLCLHQKLDSQEPG
O60673	1227	SRKHTTLKDEKIKSQ	P53396	948	AAAKMFSKAFDSGII	Q8TB03	84	CQVCAEWKREILRHH
O60673	1399	NYLSSIGKLSEYRNS	P53396	962	IPMEFVNKMKKEGKL	Q8TB36	203	LLDHDNVKYLKKILD
O60673	1582	RSVTSPRKPRTPRST	P53396	968	NKMKKEGKLIMGIGH	Q8TB36	287	YERVLKRKTFNKVLG
O60673	556	ATSKLSVKPSIFHKD	P53396	97	GQEATVGKATGFLKN	Q8TB61	216	FPTQVLAKASKVIPV
O60673	924	YTLRAKRKVNYETED	P53396	978	MGIGHRVKSINNPDM	Q8TB72	1023	QRKIIMHKIRPHITT
O60673	942	SFVTHNSKISLPHPM	P53396	991	DMRVQILKDYVRQHF	Q8TB72	128	AETDGPEKGDQKGKA
O60673	960	ESLDGTLKSRKRRKM	P53567	44	AGPGGGGKAVAPSKQ	Q8TB72	22	MGELLPTKKFWEPDD
O60675	71	YAASCRIKRVTQKEE	P53582	19	DGCSSEAKLQCPTCI	Q8TB72	940	GRPEDKSKIVSEIRG
O60684	134	DRFVEFLKRNENCTL	P53582	298	YCGHGIHKLFHTAPN	Q8TB72	956	VLALSQHKFASNVVE
O60684	457	RLGEQEGKRSGSGVN	P53582	311	PNVPHYAKNKAVGVM	Q8TBC4	147	NVVPHFNKIQDFNDT
O60684	9	ETMASPGKDNYRMKS	P53582	42	FCSQECFKGSWATHK	Q8TBC4	21	IEELLAEKMAVDGGC
O60701	107	KGRAADLKYIEACAR	P53597	105	LPVFNTVKEAKEQTG	Q8TBC4	307	RLTQGVVKRIIPAVA
O60701	173	GTAIKDLKNPDRVLI	P53597	338	QLGTTIYKEFEKRKM	Q8TBC4	409	ITATLEGKNRTLYLQ
O60701	434	RIHKKMLKPAFIFDG	P53597	54	RQHLYVDKNTKIICQ	Q8TBE9	42	LQSKYHYKEEAEIIC
O60701	490	SLQDPPNKKPKV***	P53597	57	LYVDKNTKIICQGFT	Q8TBF2	120	ILPAALGKPVRDVAA
O60701	491	LQDPPNKKPKV****	P53597	66	ICQGFTGKQGTFHSQ	Q8TBF4	186	EEEQKKWKPSSGVPS
O60711	157	GHCASCQKPIAGKVI	P53597	81	QALEYGTKLVGGTTP	Q8TBM3	279	DLYTVLHKTEDYLRQ
O60711	347	CISAMGYKFHPEHFV	P53602	207	LVVSAEKKLTGSTVG	Q8TBX8	101	LPSHFKFKEYCPQVF
O60716	25	EQEAQFEKLTRALEE	P53602	5	***MASEKPLAAVTC	Q8TBY8	908	QQKVANEKLGNQLRE
O60716	355	ASLDSLRKGGPPPPN	P53611	124	NKVVEYVKGLQKEDG	Q8TBY8	963	ENTRLCTKALGPSRT
O60716	433	LGACGALKNISFGRD	P53611	22	PDTLLLEKHADYIAS	Q8TBY8	985	VCGTLGWKGLPQDMG
O60716	574	GQKDSDSKLVENCVC	P53611	6	**MGTPQKDVIIKSD	Q8TBY9	1024	DTGKLIDKINLPDFL
O60739	56	GIADDYDKKKLVKAF	P53618	298	KESDNNVKLIVLDRL	Q8TBZ0	820	RPLASDLKGYFKVKD
O60739	58	ADDYDKKKLVKAFKK	P53618	378	SEHEDTDKYRQLLVR	Q8TBZ3	139	PIKKETSKLFNEERL
O60739	61	YDKKKLVKAFKKKFA	P53618	494	PIVESEIKKEAGELK	Q8TBZ6	170	NWKDIHIKPEHYSEL
O60739	65	KLVKAFKKKFACNGT	P53618	651	SAKLEEEKLSQKKES	Q8TC07	190	LCESPQDKRTLLVNC
O60739	66	LVKAFKKKFACNGTV	P53618	712	AADPLASKLNKVTQL	Q8TC12	112	KSIRAFAKGFLAEEK
O60749	116	IAPRIESKSMSAPVI	P53618	771	GDLKLVEKPSPLTLA	Q8TC12	77	LACRDVEKGELVAKE
O60749	193	DFLGLHSKLASKYLH	P53618	913	LANVSIEKPIHQGPD	Q8TC27	487	GLSCKNNKFICYDGD
O60749	211	IVPPAPEKSIVGMTK	P53618	949	DKINLSQKKTSI***	Q8TC27	538	CGRDRNNKYVFCGWR
O60749	218	KSIVGMTKVKVGKED	P53621	1028	KFEEAVEKFRSILLS	Q8TC56	42	RGEYNIFKYAPMFES
O60749	234	SSTEFVEKRRAALER	P53621	1119	FFKLKNFKTAATFAR	Q8TC71	20	TLRTLQEKLDFWLKE
O60749	416	HRMKCWQKWEDAQIT	P53621	1134	RLLELGPKPEVAQQT	Q8TC84	19	PHPPVVGKVTHHSIE
O60749	442	MVANKPDKIQQAKNE	P53621	1150	KILSACEKNPTDAYQ	Q8TC84	33	ELYWDLEKKAKRQGP
O60749	447	PDKIQQAKNEIREWE	P53621	1197	ACYSPEFKGQICRVT	Q8TC84	34	LYWDLEKKAKRQGPQ
O60749	456	EIREWEAKVQQGERD	P53621	1211	TTVTEIGKDVIGLRI	Q8TCA0	43	SFPIGIYKVLRNVSG
O60749	469	RDFEQISKTIRKEVG	P53621	238	IWRMNESKAWEVDTC	Q8TCA0	68	ELKSLTSKFMTTFSQ
O60749	484	RFEKERVKDFKTVII	P53621	271	ILSNSEDKSIRVWDM	Q8TCC3	152	LVVQWHLKPVEQKAH
O60749	487	KERVKDFKTVIIKYL	P53621	280	IRVWDMSKRTGVQTF	Q8TCD5	104	ICTSPLLKYHHCVGE
O60762	197	YRKEVLEKLIEKCVS	P53621	4	****MLTKFETKSAR	Q8TCD5	112	YHHCVGEKYRWVEQH
O60763	202	RSNGAIQKIVAFENA	P53621	411	NPDAPEGKRSSGLTA	Q8TCD5	146	GDLLIDDKDTVRGQE
O60763	25	TEAETIQKLCDRVAS	P53621	441	SLLIKNLKNEITKKV	Q8TCF1	142	KNSETAAKVALMKLK
O60763	580	GKENFIEKLGFISKH	P53621	46	RMCTLIDKFDEHDGP	Q8TCG1	21	VSQYKAVKSEANATQ
O60763	626	ELEGVITKAIYKSSE	P53621	480	TLFDVQQKRTLASVK	Q8TCG1	40	LEVISGQKLTRLFTS
O60763	791	SEQVAELKQELATLK	P53621	598	TIDPTEFKFKLALIN	Q8TCG1	820	EKIKTLQKEREDKEE
O60763	815	ITKLQTEKQELLQKT	P53621	619	LHMVRNAKLVGQSII	Q8TCJ2	10	EPSAPESKHKSSLNS
O60763	858	SALLQETKELKNEIK	P53621	643	EVALHFVKDEKTRFS	Q8TCJ2	513	NQGNLYDKAGKVRKH
O60784	106	LVRTILPKNNPPTIV	P53621	671	AAKALDDKNCWEKLG	Q8TCJ2	754	GNKDIKFKHLEEAFT
O60812	144	ALAVVPSKRQRLSGN	P53621	721	EKLRKMMKIAEIRKD	Q8TCN5	840	VLGKSPGKTQLKSSE
O60812	157	GNTSRRGKSGFNSKS	P53621	750	SERVRILKNCGQKSL	Q8TCN5	91	ELCEIPAKVIQSPAA
O60812	174	RGSSKSGKLKGDDLQ	P53621	8	MLTKFETKSARVKGL	Q8TCS8	246	QDFCHAIKVGVKYTQ
O60812	176	SSKSGKLKGDDLQAI	P53621	825	FEGTIASKGKGGALA	Q8TCS8	250	HAIKVGVKYTQQIIQ
O60812	191	KQELTQIKQKVDSLL	P53634	140	NWACFTGKKVGTASE	Q8TCS8	264	QGIQQLVKETGVTKR
O60812	193	ELTQIKQKVDSLLEN	P53634	334	TDSPCKMKEDCFRYY	Q8TCS8	285	TPSPEIVKYTHKLAM
O60812	203	SLLENLEKIEKEQSK	P53634	63	VMGPQEKKVVVYLQK	Q8TCS8	289	EIVKYTHKLAMERLY
O60812	29	NLNTLVVKKSDVEAI	P53674	160	LFEGANFKGNTIEIQ	Q8TCS8	306	FTDYEHDKVSRDEAV
O60812	30	LNTLVVKKSDVEAIF	P53674	6	**MSQAAKASASATV	Q8TCS8	327	TEEQLKEKFPEADPY
O60812	39	DVEAIFSKYGKIAGC	P53675	1034	LLILTAIKADRTRVM	Q8TCS8	357	SIVLNEYKRCDGRDL
O60814	109	LLPGELAKHAVSEGT	P53675	1347	WSRVNIPKVLRAAEQ	Q8TCS8	378	SCEVDMFKTLHGSAL
O60814	117	HAVSEGTKAVTKYTS	P53675	1392	AWKEGQFKDIITKVA	Q8TCS8	439	YATNEIGKVTGLNRR
O60814	12	AKSAPAPKKGSKKAV	P53675	1449	AGQLPLVKPYLRSVQ	Q8TCS8	521	VTKTDPEKGEIEDYR
O60814	121	EGTKAVTKYTSAK**	P53675	1529	AQSVELCKKDHLYKD	Q8TCS8	591	EILQIMNKTISKPRA
O60814	13	KSAPAPKKGSKKAVT	P53675	450	GRKQLLEKWLKEDKL	Q8TCS8	616	TVQVPLSKRAKFVGP
O60814	16	PAPKKGSKKAVTKAQ	P53675	453	QLLEKWLKEDKLECS	Q8TCS8	619	VPLSKRAKFVGPGGY
O60814	17	APKKGSKKAVTKAQK	P53675	456	EKWLKEDKLECSEEL	Q8TCS8	62	KLEISSGKLARFADG
O60814	21	GSKKAVTKAQKKDGK	P53675	506	QKIVLYAKKVGYTPD	Q8TCS8	629	GPGGYNLKKLQAETG
O60814	24	KAVTKAQKKDGKKRK	P53675	507	KIVLYAKKVGYTPDW	Q8TCT9	352	SYEESNPKDPAAVTE
O60814	25	AVTKAQKKDGKKRKR	P53675	637	YTDLYDIKRAVVHTH	Q8TCU4	1149	SYSQHREKPSIFHQQ
O60814	35	KKRKRSRKESYSVYV	P53675	737	KYIQAACKTGQIKEV	Q8TCU4	1196	TFYSQREKPGIFYQQ
O60814	44	SYSVYVYKVLKQVHP	P53675	742	ACKTGQIKEVERICR	Q8TCU4	1291	SYSQYREKPSIFYQQ
O60814	47	VYVYKVLKQVHPDTG	P53675	764	ERVKNFLKEAKLTDQ	Q8TCU4	1622	GSSALGEKPITFYRQ
O60814	58	PDTGISSKAMGIMNS	P53675	78	AIMNPASKVIALKAG	Q8TCU4	1669	TSYSNRGKPVIFYQQ
O60814	6	**MPEPAKSAPAPKK	P53675	83	ASKVIALKAGKTLQI	Q8TCU4	1828	HFTEAGLKILRVPGP
O60814	86	SRLAHYNKRSTITSR	P53675	851	ELVAEVEKRNRLKLL	Q8TCU4	2146	SSFSHREKPDIFYQK
O60826	423	HLAGQWEKHRVPLLA	P53675	856	VEKRNRLKLLLPWLE	Q8TCU4	3057	LCPKTSSKLDSGTLD
O60826	531	EINSLSGKLDRTFAV	P53675	881	ATHNALAKIYIDSNN	Q8TCU4	3099	RSLEPTSKLLTSKPV
O60828	102	SNADAEEKLDRSHDK	P53675	96	QIFNIEMKSKMKAHT	Q8TCU4	487	TSKGGIAKVTQSNLK
O60828	18	LAKRGILKHLEPEPE	P53677	413	KYMTKAGKFQVRT**	Q8TCU4	896	VPGPGDQKTGIPSAP
O60828	197	SKKAVSRKDEELDPM	P53680	18	AGKTRLAKWYMQFDD	Q8TCU6	241	CSNINETKRQMEKLE
O60832	151	KSQQSAGKEYVGIVR	P53680	45	VVTVRDAKHTNFVEF	Q8TD19	318	RRREMEEKVTLLNAP
O60832	191	PPLIAAVKRQLRVRT	P53680	56	FVEFRNFKIIYRRYA	Q8TD19	327	TLLNAPTKRPRSSTV
O60832	291	RVVYPLEKLLTSHKR	P53701	132	MFWNAMLKKGWKWKD	Q8TD19	361	GGKSTPQKLDVIKSG
O60832	302	SHKRLVMKDSAVNAI	P53701	138	LKKGWKWKDEDISQK	Q8TD19	635	QLGVGNYKKRLGINL
O60832	314	NAICYGAKIMLPGVL	P53701	33	PMHEGKMKGCPVNTE	Q8TD19	731	VEKVLNSKTIRSNSS
O60832	379	ERDTYPRKWGLGPKA	P53701	48	PSGPTCEKKTYSVPA	Q8TD26	10	MKIQKKEKQLSNLKV
O60832	39	HAEEFLIKPESKVAK	P53701	49	SGPTCEKKTYSVPAH	Q8TD26	1003	GKGSTFAKASFVASG
O60832	394	SQKKLMIKQGLLDKH	P53804	1596	QKNDGKEKEHELHLD	Q8TD26	186	TKSRKASKEQGPTPV
O60832	400	IKQGLLDKHGKPTDS	P53804	1669	QAEAFLKKLGLISRD	Q8TD26	1941	AACQCHCKHMERWMH
O60832	403	GLLDKHGKPTDSTPA	P53985	462	NEQKKESKEEETSID	Q8TD26	900	CHRIGQSKAVKVYRL
O60832	413	DSTPATWKQEYVDYS	P53985	473	TSIDVAGKPNEVTKA	Q8TD57	630	QNIAAFLKENHDIDD
O60832	424	VDYSESAKKEVVAEV	P53990	127	VADQLCAKYSKEYGK	Q8TD57	711	QYSHIADKVSEVPAN
O60832	433	EVVAEVVKAPQVVAE	P53990	134	KYSKEYGKLCRTNQI	Q8TDB6	25	SGPRVRRKLESYFQS
O60832	443	QVVAEAAKTAKRKRE	P53990	151	VNDRLMHKLSVEAPP	Q8TDB6	253	FKYICPDKINSIEKR
O60832	46	KPESKVAKLDTSQWP	P53990	7	*MLGSGFKAERLRVN	Q8TDB6	306	QKNTEPLKQECVSLA
O60832	61	LLLKNFDKLNVRTTH	P53992	1087	DFLCHMHKEIRQLLS	Q8TDB6	401	QEISEIEKRYDICSK
O60832	80	ACGSNPLKREIGDYI	P53992	319	PPQPLPPKRLDPDAI	Q8TDB6	408	KRYDICSKVSEKGQK
O60832	96	TGFINLDKPSNPSSH	P53992	638	KAAECAGKLFLFHTS	Q8TDB6	518	GMSSLAGKKLKEGHE
O60841	1015	INIGPVHKKDVMKAS	P53992	668	RKLINTDKEKTLFQP	Q8TDB6	675	KEGRKVLKLLYRAFD
O60841	1095	AVFPCKIKILPQYIF	P53992	913	VYLNCVLKSDVLQPG	Q8TDD1	109	GLSYPVFKGIMKKGY
O60841	1160	KGQEVCVKIEPIPGE	P53999	101	GEMKPGRKGISLNPE	Q8TDD1	134	IPVILDGKDVVAMAR
O60841	1170	PIPGESPKMFGRHFE	P53999	35	KKQVAPEKPVKKQKT	Q8TDD1	146	MARTGSGKTACFLLP
O60841	1195	RQSIDALKDWFRDEM	P53999	38	VAPEKPVKKQKTGET	Q8TDD1	184	ELALQTLKFTKELGK
O60841	1214	WQLIVELKKVFEII*	P53999	5	***MPKSKELVSSSS	Q8TDD1	187	LQTLKFTKELGKFTG
O60841	275	KQKESQRKFEEETVK	P53999	53	SRALSSSKQSSSSRD	Q8TDD1	191	KFTKELGKFTGLKTA
O60841	410	KEGKLLTKSQREARA	P53999	68	DNMFQIGKMRYVSVR	Q8TDD1	196	LGKFTGLKTALILGG
O60841	436	QGVEVPSKDSLPKKR	P53999	97	MDPEGEMKPGRKGIS	Q8TDD1	306	IRLDVDTKLNEQLKT
O60841	622	KRRLEHSKNVNTEKL	P54107	80	QNARIFSKYCDMTES	Q8TDD1	383	ARKINLAKFTLGKCS
O60841	628	SKNVNTEKLRAPIIC	P54132	1125	FLGSKSAKIQSGIFG	Q8TDD1	388	LAKFTLGKCSTLIVT
O60841	646	HVDTGKTKILDKLRH	P54132	1133	IQSGIFGKGSAYSRH	Q8TDD1	420	YSFPAKGKLFLHRVG
O60841	686	NEQTKMIKNFDRENV	P54132	129	TQNTPTVKKSRDTAL	Q8TDD1	5	***MAADKGPAAGPR
O60841	765	IDRLYDWKKSPDSDV	P54132	1329	SSHYFASKTRNERKR	Q8TDD1	535	PESIKRAKEMDLVGL
O60841	777	SDVAATLKKQKKNTK	P54132	1403	LGIMAPPKPINRPFL	Q8TDD1	567	LRLVDSIKNYRSRAT
O60841	784	KKQKKNTKDEFEERA	P54132	1411	PINRPFLKPSYAFS*	Q8TDD1	687	FYIPYRPKDFDSERG
O60841	82	DRETVAVKPTENNEE	P54132	29	NNKLSLSKPKFSGFT	Q8TDJ6	1049	EKEIYHWKRWPLMND
O60841	911	LLLPPPMKELRVKNQ	P54132	31	KLSLSKPKFSGFTFK	Q8TDJ6	1494	EKRENKSKVINLSQY
O60841	921	RVKNQYEKHKEVEAA	P54132	390	IDTIPDDKLKLLDCG	Q8TDJ6	92	PLGINSHKRNCQLKC
O60841	923	KNQYEKHKEVEAAQG	P54132	476	LLTTTLGKTGFSATR	Q8TDM6	510	KALCQELKEALQEAD
O60841	968	DELIHELKQTLNAIK	P54132	755	NIYLQLSKKDPIIKL	Q8TDN6	110	INEVCEMKNCNKCIY
O60861	302	KLHSEVEKPLMNFRE	P54132	863	SFNRHNLKYYVLPKK	Q8TDN6	114	CEMKNCNKCIYFEAK
O60869	102	LATKINEKPQVIADY	P54132	968	VIHASLPKSVEGYYQ	Q8TDN6	121	KCIYFEAKKKQDLYM
O60869	123	PNNQVLGKIERAIGL	P54136	143	EIAENITKHLPDNEC	Q8TDN6	153	IHTLAELKMTGNCLK
O60869	131	IERAIGLKLRGKDIG	P54136	153	PDNECIEKVEIAGPG	Q8TDN6	160	KMTGNCLKGSRPLLS
O60869	135	IGLKLRGKDIGKPIE	P54136	205	FSSPNIAKEMHVGHL	Q8TDN6	17	GGFAVQAKKPKRNEI
O60869	143	DIGKPIEKGPRAK**	P54136	287	FDTEEEFKKRAYQCV	Q8TDN6	18	GFAVQAKKPKRNEID
O60869	50	KWAAGQNKQHSITKN	P54136	288	DTEEEFKKRAYQCVV	Q8TDN6	197	STPRYHPKSQPFVDH
O60869	60	SITKNTAKLDRETEE	P54136	30	TAEIDRLKNCGCLGA	Q8TDN6	276	IRSITAAKYREKQQV
O60869	79	RVTLEVGKVIQQGRQ	P54136	300	CVVLLQGKNPDITKA	Q8TDN6	31	IDAEPPAKRHATAEE
O60869	93	QSKGLTQKDLATKIN	P54136	306	GKNPDITKAWKLICD	Q8TDN6	322	PIEIQWVKPEPKVDL
O60869	98	TQKDLATKINEKPQV	P54136	309	PDITKAWKLICDVSR	Q8TDN6	53	RIPGPVCKGKWKNKE
O60870	231	TLGPSALKTIGSSAS	P54136	347	DRMNDIVKEFEDRGF	Q8TDN6	89	RMLMPHSKADTKMDR
O60870	311	IVKEVIDKYTAVVKM	P54136	377	SIPLTIVKSDGGYTY	Q8TDN6	99	TKMDRKDKLFVINEV
O60879	123	DMNLNEEKKAPLRNK	P54136	393	TSDLAAIKQRLFEEK	Q8TDP1	95	EKKVSMGKPDPLRDS
O60879	124	MNLNEEKKAPLRNKD	P54136	50	QLQEENLKLKYRLNI	Q8TDW0	586	LVMLNNLKKMTNLTE
O60879	130	KKAPLRNKDFTTKRE	P54136	504	SVAYGCIKYADLSHN	Q8TDX7	248	MNLYSLCKKIEQCDY
O60879	232	IDKKNQYKLIQCLKA	P54136	522	DYIFSFDKMLDDRGN	Q8TDX7	74	IFDLMDAKARADCIK
O60879	503	KAAEFSKKFDEEFTA	P54136	557	IDEEMLQKAARETKI	Q8TDY2	1041	EIIQEKEKQLQELKL
O60879	639	YKPEVSMKRINWSKI	P54136	570	KILLDHEKEWKLGRC	Q8TDY2	1263	VEKELLEKVKHLENQ
O60880	89	NLISAFQKPDQGIVI	P54136	573	LDHEKEWKLGRCILR	Q8TDY2	1353	IINDLSDKLKSTMQQ
O60884	121	EDMMHPLKVSLEDLY	P54136	60	YRLNILRKSLQAERN	Q8TDY2	276	TADAESGKEIRESCQ
O60884	134	LYNGKTTKLQLSKNV	P54136	629	RQTGKILKVNMWRML	Q8TDY2	569	FCTQKPRKFDCELPD
O60884	152	ACSGQGGKSGAVQKC	P54198	114	TVFGSSGKLANVEQW	Q8TDY2	883	GKLDGLIKETEENEN
O60884	158	GKSGAVQKCSACRGR	P54198	187	LTWDPVGKYIASQAD	Q8TDY2	891	ETEENENKIKKLKGE
O60884	199	EGEVINEKDRCKKCE	P54198	292	QKNGSSAKPSCPYCC	Q8TE49	516	RADSVANKLGSFSKT
O60884	223	ILEVHVDKGMKHGQR	P54198	563	PSKIEPMKAFDSRFT	Q8TE73	310	QLKSPDVKAVLAVLA
O60884	25	GASENELKKAYRKLA	P54198	600	LKEQNLVKELRPRDL	Q8TE73	320	LAVLAAAKSKLLKTW
O60884	326	QYRNPFEKGDLYIKF	P54198	630	ASSLSKRKLELEVET	Q8TEA1	38	GKQEAERKFETLLKH
O60884	46	KNPNAGDKFKEISFA	P54198	640	LEVETVEKKKKGRPR	Q8TEA1	419	GLSCEQLKQLQRFDP
O60885	1111	PQPLVVVKEEKIHSP	P54252	200	GEELAQLKEQRVHKT	Q8TEA8	61	VFEDESGKHWSKSVM
O60885	1153	LPQRPEMKPVDVGRP	P54259	46	STSSSDGKAEKSRQT	Q8TEA8	65	ESGKHWSKSVMDKQY
O60885	1177	PPPGAPDKDKQKQEP	P54259	641	PGPPPYGKRAPSPGA	Q8TED0	134	TVDFTADKYHVVSGA
O60885	1208	SWASLVQKHPTTPSS	P54259	791	FVPLEGSKLAKKRAD	Q8TED0	174	VRCGCASKLNPDLFI
O60885	177	EIMIVQAKGRGRGRK	P54277	274	VHQKDILKLIRHHYN	Q8TED0	230	SAGGRYVKVWDMLKG
O60885	317	PPEPKTTKLGQRRES	P54277	522	VKILVPEKSLPCKVS	Q8TED0	245	GQLLVSLKNHHKTVT
O60885	346	QQHPAPEKSSKVSEQ	P54277	894	QLPMYLSKEDIQDII	Q8TED0	249	VSLKNHHKTVTCLCL
O60885	362	KCCSGILKEMFAKKH	P54277	905	QDIIYRMKHQFGNEI	Q8TED0	30	TLYWNNYKTPVQIKE
O60885	367	ILKEMFAKKHAAYAW	P54278	210	TNQLGQGKRQPVVCT	Q8TED0	36	YKTPVQIKEFGAVSK
O60885	368	LKEMFAKKHAAYAWP	P54278	394	MHAADLEKPMVEKQD	Q8TED0	398	EITVSIIKELNRRGV
O60885	431	LMFSNCYKYNPPDHE	P54278	465	TSGAISDKGVLRPQK	Q8TED0	416	ALAGRDEKEISHVLN
O60885	456	VFEMRFAKMPDEPEE	P54278	577	NLATPNTKRFKKEEI	Q8TED0	74	RYSQEPIKTFSRFKD
O60885	629	INKLPGEKLGRVVHI	P54577	146	VVTQHDSKKAGAEVV	Q8TED0	80	IKTFSRFKDTAYCAT
O60885	660	EIDFETLKPSTLREL	P54577	190	FGGIDQRKIFTFAEK	Q8TED1	90	DRNYLGLKELHKEFG
O60885	685	KRKPQAEKVDVIAGS	P54577	197	KIFTFAEKYLPALGY	Q8TED1	94	LGLKELHKEFGPSHF
O60885	694	DVIAGSSKMKGFSSS	P54577	206	LPALGYSKRVHLMNP	Q8TEH3	428	TKANPAMKTVYKFAK
O60885	72	YLLRVVLKTLWKHQF	P54577	231	SSSEEESKIDLLDRK	Q8TEH3	723	PPIPRPAKLQAAGAA
O60890	37	ERTNKFIKDVIKDGN	P54577	247	DVKKKLKKAFCEPGN	Q8TEK3	1228	GGGLAGRKPAPAGEP
O60907	210	HSVNNHAKPMEIDGE	P54577	26	QEVLGEEKLKEILKE	Q8TEK3	1240	GEPVNSSKWKSTFSP
O60925	10	APVDLELKKAFTELQ	P54577	272	KHVLFPLKSEFVILR	Q8TEK3	1402	PLCGPTDKTPLLSGK
O60925	26	KVIDTQQKVKLADIQ	P54577	310	VVHPGDLKNSVEVAL	Q8TEK3	1409	KTPLLSGKAAKARDR
O60925	28	IDTQQKVKLADIQIE	P54577	319	SVEVALNKLLDPIRE	Q8TEK3	308	GSVSWTGKPVSYYLH
O60925	97	KIKELEQKKSYLERS	P54577	327	LLDPIREKFNTPALK	Q8TEK3	358	SNAATPTKGPEGKVA
O60927	31	ENRSLTIKLRKRKPE	P54577	334	KFNTPALKKLASAAY	Q8TEM1	1328	RVLDGPEKVPVVHVD
O60927	59	HMGRRSSKCCCIYEK	P54577	374	RLDIRVGKIITVEKH	Q8TEQ6	1057	TCAYDAAKVLAKKGD
O60927	66	KCCCIYEKPRAFGES	P54577	380	GKIITVEKHPDADSL	Q8TEQ6	1134	LSRHLEEKQLSEGKS
O60934	208	DEPSIGSKNVDLSGR	P54577	412	GLVQFVPKEELQDRL	Q8TEQ6	1187	FQKLQNIKYPSATNN
O60934	233	TFIFLNAKQHKKLSS	P54577	427	VVVLCNLKPQKMRGV	Q8TEQ6	1261	GCDHLRDKLGDHQSP
O60934	334	GHPSTGLKTTTPGPS	P54577	430	LCNLKPQKMRGVESQ	Q8TEQ6	1363	FKELFSEKHASLQNS
O60934	544	SKSHAAEKLRSNKKR	P54577	47	WGTATTGKPHVAYFV	Q8TEQ6	1403	STANGPDKNEPEVEA
O60934	642	KEISNNDKLQDDSEM	P54577	470	PGEHVFVKGYEKGQP	Q8TEQ6	1422	CSSQSQCKEEKNEPL
O60934	73	LTLKDNSKYGTFVNE	P54577	474	VFVKGYEKGQPDEEL	Q8TEQ6	1425	QSQCKEEKNEPLSLP
O60942	287	NIKLLDLKPYKVSWK	P54577	482	GQPDEELKPKKKVFE	Q8TEQ6	247	CYLATGSKDQTIRIW
O60942	395	IISPRHEKMKTGLID	P54577	490	PKKKVFEKLQADFKI	Q8TEQ6	282	GGIDPTVKERLWLTL
O60942	397	SPRHEKMKTGLIDKT	P54577	506	EECIAQWKQTNFMTK	Q8TEQ6	320	LTQSWRRKYTLFSAS
O60942	403	MKTGLIDKTQEPFSV	P54577	513	KQTNFMTKLGSISCK	Q8TEQ6	419	IKNNYDVKNFWQGVK
O75027	216	VRNAVFGKVAQNSIR	P54577	520	KLGSISCKSLKGGNI	Q8TEQ6	426	KNFWQGVKSKVTALC
O75027	251	RQTGALSKAIDRGTR	P54578	14	TVKWGKEKFEGVELN	Q8TEQ6	438	ALCWHPTKEGCLAFG
O75027	608	QVGERGLKLSGGEKQ	P54578	214	MMRVLQQKLEAIEDD	Q8TEQ6	450	AFGTDDGKVGLYDTY
O75030	128	THLENPTKYHIQQAQ	P54578	224	AIEDDSVKETDSSSA	Q8TEQ6	460	LYDTYSNKPPQISST
O75030	45	AEHPGASKPPISSSS	P54578	238	ASAATPSKKKSLIDQ	Q8TEQ6	524	GEAFDINKLIRDTNS
O75037	677	KLILLQNKIRDTQLE	P54578	291	KYLFTGLKLRLQEEI	Q8TEQ6	533	IRDTNSIKYKLPVHT
O75037	702	MECYTEEKANKIKAD	P54578	300	RLQEEITKQSPTLQR	Q8TEQ6	535	DTNSIKYKLPVHTEI
O75044	1035	VKMAAPVKPPATRPK	P54578	313	QRNALYIKSSKISRL	Q8TEQ6	754	PTLRTPVKLESIDGN
O75052	96	KKLLLLQKKEWTWDE	P54578	336	VRFFYKEKESVNAKV	Q8TEQ6	815	PVSSGFEKSKVTINN
O75052	97	KLLLLQKKEWTWDES	P54578	375	VSFRSKFKDLEDKKV	Q8TEQ6	860	TSLDHRSKEELHQDC
O75083	104	EYQPFAGKIKDIAWT	P54578	391	QQPNTSDKKSSPQKE	Q8TET4	419	KNRFPNPKRMQELLR
O75083	115	IAWTEDSKRIAVVGE	P54578	449	RKQDEWIKFDDDKVS	Q8TEU7	1221	TTEEISGKKHTEDTI
O75083	126	VVGEGREKFGAVFLW	P54578	454	WIKFDDDKVSIVTPE	Q8TEU7	1469	SSEGLDPKDATDPVY
O75083	155	VINSVDIKQSRPYRL	P54578	49	ARQKVMVKGGTLKDD	Q8TEU7	1540	SVAVQRSKMMHNSLS
O75083	180	FFEGPPFKFKFTIGD	P54578	54	MVKGGTLKDDDWGNI	Q8TEW8	74	DVVEDKDKLIAVFEE
O75083	182	EGPPFKFKFTIGDHS	P54578	62	DDDWGNIKIKNGMTL	Q8TEX9	788	SCGTLTLKPPGRLAE
O75083	219	QIYIYDGKTGEKVCA	P54619	264	NLDVSVTKALQHRSH	Q8TEX9	801	AELCGVLKAVLQRKT
O75083	223	YDGKTGEKVCALGGS	P54646	69	KREIQNLKLFRHPHI	Q8TEY7	31	KQEKIPNKMSAFRNH
O75083	231	VCALGGSKAHDGGIY	P54652	113	VEYKGETKTFFPEEI	Q8TF01	453	QQTERVTKEMNEFIH
O75083	256	LLSASGDKTSKIWDV	P54652	129	SMVLTKMKEIAEAYL	Q8TF01	461	EMNEFIHKEQNSLSL
O75083	28	KIIGGDPKGNNFLYT	P54652	139	AEAYLGGKVHSAVIT	Q8TF01	730	RSGSISVKIIRHDSR
O75083	321	HVIKGHSKSIQCLTV	P54652	249	SHLAEEFKRKHKKDI	Q8TF09	52	LLHHLTMKAKSTVRD
O75083	330	IQCLTVHKNGGKSYI	P54652	89	ATVQSDMKHWPFRVV	Q8TF40	142	GSVAMSYKGSTLKIH
O75083	334	TVHKNGGKSYIYSGS	P54687	2	******MKDCSNGCS	Q8TF40	720	DSDSHTGKAMRSTGM
O75083	362	ENDSFAGKGHTNQVS	P54707	42	KNNCLELKKKNHKEE	Q8TF42	21	AREELYSKVTPRRNR
O75083	38	NFLYTNGKCVILRNI	P54709	111	AGYIEDLKKFLKPYT	Q8TF46	906	GAAYLKNKDGLVISC
O75083	405	YSGQGVVKLDVQPKC	P54709	182	MNRIIGLKPEGVPRI	Q8TF68	167	VVPDLSKKVASTLTE
O75083	480	SILGTTLKDEGKLLE	P54709	194	PRIDCVSKNEDIPNV	Q8TF68	189	GGGSVAPKPPRGRKK
O75083	511	LAVCDASKVVTVFSV	P54725	122	PPAAREDKSPSEESA	Q8TF68	282	IRIHSGAKPYSCNFC
O75083	569	SDPETRVKIQDAHRL	P54725	16	TLQQQTFKIRMEPDE	Q8TF68	291	YSCNFCEKSFRQLSH
O75083	65	AHQVVVAKYAPSGFY	P54725	47	AFPVAGQKLIYAGKI	Q8TF68	343	LRIHSGAKPYNCSYC
O75083	81	ASGDVSGKLRIWDTT	P54725	53	QKLIYAGKILSDDVP	Q8TF74	66	RSAPILEKPKGSSGG
O75083	90	RIWDTTQKEHLLKYE	P54727	14	TLQQQTFKIDIDPEE	Q8TF74	68	APILEKPKGSSGGYG
O75083	95	TQKEHLLKYEYQPFA	P54727	147	ASAAKQEKPAEKPAE	Q8TF76	229	EEATGGAKDTRMVHQ
O75116	1037	LKTQAVNKLAEIMNR	P54727	151	KQEKPAEKPAETPVA	Q8TF76	291	PGLSSTGKRRATGQD
O75116	1368	SSPRTSMKIQQNQSI	P54727	34	KEKIESEKGKDAFPV	Q8WTR7	148	GESPTECKSHELKRG
O75116	224	PDNMLLDKHGHLKLA	P54727	45	AFPVAGQKLIYAGKI	Q8WTR7	153	ECKSHELKRGLSPVS
O75116	323	PEDAEISKHAKNLIC	P54727	51	QKLIYAGKILNDDTA	Q8WTR7	176	MVHNVSEKTLTPAKS
O75116	605	NNRDLQDKNCLLETA	P54727	60	LNDDTALKEYKIDEK	Q8WTR7	182	EKTLTPAKSKEYRGE
O75116	769	SLLDCDLKQSQQKIN	P54727	63	DTALKEYKIDEKNFV	Q8WTR7	184	TLTPAKSKEYRGEFF
O75116	884	KTQVRELKEECEEKT	P54727	76	FVVVMVTKPKAVSTP	Q8WTR7	216	YQCSECGKSFSGSYR
O75116	890	LKEECEEKTKLGKEL	P54750	40	GILRCLVKQLERGDV	Q8WTR7	235	WITHTREKPTVHQEC
O75116	892	EECEEKTKLGKELQQ	P54819	117	MLDDLMEKRKEKLDS	Q8WTR7	327	YNCNECGKAFTRIFH
O75116	895	EEKTKLGKELQQKKQ	P54819	14	AAEPEYPKGIRAVLL	Q8WTR7	382	SECQECGKIFRHSSL
O75116	9	SRPPPTGKMPGAPET	P54819	181	RRSDDNEKALKIRLQ	Q8WTR7	485	QAIHTAEKPYSCAEC
O75116	946	LEKEKIMKELEIKEM	P54819	28	LGPPGAGKGTQAPRL	Q8WTR7	541	ESVHAREKQGFFVSG
O75116	989	VANLANEKEELNNKL	P54819	62	ASGSELGKKLKATMD	Q8WTR7	549	QGFFVSGKILDQNPE
O75122	28	SSAASAFKVPAPKTS	P54819	93	NLETPLCKNGFLLDG	Q8WTR7	598	FECDQCGKAFGQSTR
O75122	428	EDGRVRAKLSAPLAG	P54840	387	LKGQAVRKQLWDVAH	Q8WTT2	123	SSEPVHAKKRKHERI
O75122	492	VNSASAQKRSKIPRS	P54840	397	WDVAHSVKEKFGKKL	Q8WTT2	124	SEPVHAKKRKHERII
O75122	607	EAVADALKKPARRRY	P54851	129	DIHDKNAKFYPVTRE	Q8WTT2	133	KHERIIDKYEKIPRT
O75122	94	ELEETLNKIREILSD	P54868	137	GTETIIDKSKAVKTV	Q8WTT2	147	TLQTAPEKELIHLLP
O75131	109	LGQIVSSKKLTRPLV	P54868	350	LEDTYTNKDLDKALL	Q8WTT2	333	KSNVVSLKAYKGLAE
O75131	136	TISAEEIKDNRVVLF	P54868	354	YTNKDLDKALLKASQ	Q8WTT2	386	EMCCEAVKKLFKQDK
O75131	158	DNKDLFGKSDPYLEF	P54868	358	DLDKALLKASQDMFD	Q8WTT2	390	EAVKKLFKQDKLGQA
O75131	167	DPYLEFHKQTSDGNW	P54868	366	ASQDMFDKKTKASLY	Q8WTT2	410	KVISGFVKGRNYEVR
O75131	184	VHRTEVVKNNLNPVW	P54868	83	YNNVEAGKYTVGLGQ	Q8WTT2	422	EVRPEMLKTFLCLRI
O75131	21	SCANLLDKDIGSKSD	P54886	124	SGAVAFGKQRLRHEI	Q8WTT2	430	TFLCLRIKEVEVKKD
O75131	253	EFECINEKKRQKKKS	P54886	149	HSGQNQLKEMAIPVL	Q8WTT2	443	KDTEDINKPKKFMTF
O75131	262	RQKKKSYKNSGVISV	P54886	347	ITDIVEGKKVGTFFS	Q8WTT2	724	SEGSGALKPELSRRS
O75131	390	RSCLPQIKLYGPTNF	P54886	357	GTFFSEVKPAGPTVE	Q8WTT2	760	SNPKIKGKFLQGDSF
O75131	76	FEVVQKLKFGVYDID	P54886	408	DEILLANKKDLEEAE	Q8WTT2	793	ESPLDFTKYLKTSLH
O75132	19	DGDFVSDKIKFKIEE	P54886	424	RLAAPLLKRLSLSTS	Q8WTW3	11	AATSPALKRLDLRDP
O75132	215	LVQKVASKIPSPDRI	P54886	550	EDLCRLDKMIDLIIP	Q8WU03	15	QKLQILYKSLEKSIP
O75143	504	EKLAVHEKNVREFDA	P54886	59	PLSRTHGKSFAHRSE	Q8WU03	19	ILYKSLEKSIPESIK
O75143	66	PEVTHEAKKALAGQL	P54886	643	MLRVEQVKIHAGPKF	Q8WU03	26	KSIPESIKVYGAIFN
O75145	409	LEAQLEEKNQELQRA	P54886	767	TKWLLRGKDHVVSDF	Q8WU39	70	NLAKAETKLHTSNSG
O75146	146	TKISFHLKHPQFPAG	P54920	153	EQSADYYKGEESNSS	Q8WU58	361	TGYPSDLKPVTWNQH
O75146	29	AEREQFDKTQAISIS	P54920	163	ESNSSANKCLLKVAG	Q8WU76	69	DAIGGGAKQPKAVFV
O75146	542	LSHTEQSKSELSSRL	P54920	203	PLLKYSAKDYFFKAA	Q8WU79	151	GSEPVPEKKLEPVVF
O75146	556	LDTLSAEKDALSGAV	P54920	53	ARAANMFKMAKNWSA	Q8WU90	109	SVVCAFFKQGQCTKG
O75146	832	NSCTDLMKAIRLLVT	P54920	93	VDAGNAFKKADPQEA	Q8WU90	147	ARDEELEKDTMDNWD
O75150	20	GGSGPPEKKLSREEK	P55008	11	TRDLQGGKAFGLLKA	Q8WU90	181	PKTQIVCKHFLEAIE
O75150	250	LATQLQEKHHRISLE	P55010	114	TDLHVNPKKQTIGNS	Q8WU90	218	LPPGFVLKKDKKKEE
O75150	498	QNHNHQLKGDAQRYK	P55010	136	GMLDTHHKLCTFILK	Q8WU90	269	KRQEKIDKLEQDMER
O75150	517	EVQAEIGKLRAQASG	P55010	143	KLCTFILKNPPENSD	Q8WU90	285	KADFKAGKALVISGR
O75150	653	RKESELLKGLRAELK	P55010	155	NSDSGTGKKEKEKKN	Q8WU90	362	FSTYTSDKDENKLSE
O75150	686	APKEQRDKVQLMAAE	P55010	24	KMPRLIAKVEGKGNG	Q8WU90	366	TSDKDENKLSEASGG
O75150	697	MAAERKAKAEVDELR	P55010	28	LIAKVEGKGNGIKTV	Q8WU90	51	KAVTHQVKFGQQNPR
O75150	807	HKLLREEKDELGEQV	P55010	33	EGKGNGIKTVIVNMV	Q8WU90	67	VAQSEAEKKLKKDDK
O75150	985	ARQRKCPKCNAAFGA	P55010	369	YVSKELAKEIRVKAE	Q8WU90	86	QELNELFKPVVAAQK
O75151	1067	PNNNTAAKGKRTKKG	P55010	422	ETVKSDNKDDDIDID	Q8WU90	93	KPVVAAQKISKGADP
O75151	1079	KKGMATAKQRLGKIL	P55010	55	RPPTYPTKYFGCELG	Q8WUA2	300	DCEKAFFKMDNVLID
O75151	166	VDVTDVTKQKDCKMK	P55010	95	MLDGFIKKFVLCPEC	Q8WUA2	321	DFSQSVAKVKWKGKG
O75151	175	KDCKMKLKEFVDYYY	P55017	140	PVRFGWVKGVMIRCM	Q8WUA2	35	FLKLCKIKYYNYCLI
O75151	642	FSFSFSNKKLLGSKA	P55036	122	SPVEDNEKDLVKLAK	Q8WUA2	460	YSNSHKSKYQTDLYE
O75151	720	VLPTPVTKPKLDSAA	P55036	126	DNEKDLVKLAKRLKK	Q8WUA4	602	RLSDGSLKLYPFQCF
O75151	940	GLAAAAAKLSQQEEQ	P55036	365	SLASQATKDGKKDKK	Q8WUB8	178	QRITDHYKEYSQMQQ
O75152	124	QLSVQQNKLSVQSNP	P55036	368	SQATKDGKKDKKEED	Q8WUB8	239	VIQVPQGKYKVLPTE
O75152	215	ECLNFGIKTLEEIKS	P55036	40	VNIVCHSKTRSNPEN	Q8WUB8	365	PKRSVLSKSVPGYKP
O75152	269	RTVTLSTKQGEEPLV	P55036	74	DTGRILSKLHTVQPK	Q8WUD4	78	KRRVPQAKPVAVEEK
O75152	286	SLTERLGKRKFSAGG	P55036	98	RVAHLALKHRQGKNH	Q8WUF8	401	EAKTSSLKPAVTRRS
O75152	300	GDSDPPLKRSLAQRL	P55040	276	FWGKIVAKNNKNMAF	Q8WUH2	630	QRASASGKGAEATET
O75152	310	LAQRLGKKVEAPETN	P55040	279	KIVAKNNKNMAFKLK	Q8WUH6	110	NKVPLTGKKKDKSD*
O75152	320	APETNIDKTPKKAQV	P55060	109	SSPEQIQKQLSDAIS	Q8WUH6	63	GVAWIGGKSLEVTKT
O75152	329	PKKAQVSKSLKERLG	P55060	158	RTAHSLFKRYRHEFK	Q8WUI4	598	TNPLSRLKLDNGKLA
O75152	349	DNEDATDKVNKVGEI	P55060	165	KRYRHEFKSNELWTE	Q8WUI4	603	RLKLDNGKLAGLLAQ
O75152	413	FSEVLAEKKHRQQEA	P55060	17	TLTEYLKKTLDPDPA	Q8WUJ0	203	SGTTGSLKRTHEEED
O75152	433	KKDTTCIKLKIDSEI	P55060	425	KNPSVNWKHKDAAIY	Q8WUJ3	333	TEWFDHDKVSQTKGG
O75152	462	QSEEPAGKTKSMQEV	P55060	440	LVTSLASKAQTQKHG	Q8WUJ3	348	EKISDLWKAHPGKIC
O75152	478	IKTLEEIKLEKALRV	P55060	574	SENEYIMKAIMRSFS	Q8WUK0	88	CNSSQEWKRLGVEQL
O75152	518	ITKRTGMKEEKNLQE	P55060	67	VCASVTFKNYIKRNW	Q8WUM0	1089	NWSSSDGKDDPIEVS
O75152	553	TTGVDITKIQVKRCE	P55060	726	IASAAADKIPGLLGV	Q8WUM0	1097	DDPIEVSKDSIFVKI
O75152	575	QKQQEREKSVLTPLR	P55060	824	MFGMVLEKIIIPEIQ	Q8WUM0	1107	IFVKILQKLLKDGIQ
O75152	595	CNTQVAEKPVLTAVP	P55060	83	IVEDEPNKICEADRV	Q8WUM0	1110	KILQKLLKDGIQLSE
O75152	619	LPTKSSQKVEVETSG	P55060	832	IIIPEIQKVSGNVEK	Q8WUM0	122	ACLVCKEKLIIWKIA
O75152	643	CAAQTLEKRGKAKPK	P55060	848	ICAVGITKLLTECPP	Q8WUM0	135	IALSPITKLSVCKEL
O75152	654	AKPKVNVKPSVVKVV	P55060	934	HLAQSLHKLSTACPG	Q8WUM0	305	ELDDSSEKHAYSWDI
O75152	659	NVKPSVVKVVSSPKL	P55072	109	IQPCPDVKYGKRIHV	Q8WUM0	35	TPRTASRKGLPLGSA
O75152	665	VKVVSSPKLAPKRKA	P55072	112	CPDVKYGKRIHVLPI	Q8WUM0	518	ETIAQEDKIKLLKAA
O75152	684	AAVIAAVKPLSSSSV	P55072	164	GMRAVEFKVVETDPS	Q8WUM0	758	RREESLEKEPEYVPW
O75152	698	VLQEPPAKKAAVAVV	P55072	18	DLSTAILKQKNRPNR	Q8WUM0	787	RQHEIVLKVAYPQAD
O75152	764	LSSASTGKPPLSVED	P55072	190	HCEGEPIKREDEEES	Q8WUM0	82	ESVNYDVKTFGSSLP
[truncated: 7,983 more rows]

## Sheet: Glycation
Uniprot_id	PTM_site	PTM_domain	Uniprot_id	PTM_site	PTM_domain	Uniprot_id	PTM_site	PTM_domain
O00141	41	GLNDFIQKIANNSYA	P11277	1696	MYHLFQLKRETDDLE	Q6XYQ8	87	CWPCWKSKPVTSNIT
O00186	19	SVVWQKIKATVFDDC	P11277	1709	LEQWISEKELVASSP	Q6YN16	220	GIESQCRKVDIIADA
O00186	577	KKLLDDIKMLNKPKD	P11277	1772	AATIAEWKDGLNEMW	Q6ZMT4	787	RQLYRYDKPVECGYH
O00220	370	TLMLFFDKFANIVPF	P11277	1816	ILGLIDEKHRELPED	Q6ZMV5	773	RTSSGDFKFSSSYSA
O00238	202	LVQRTIAKQIQMVKQ	P11277	186	LLLWCQMKTAGYPHV	Q6ZMV5	807	HPDDEEEKEEDEEEK
O00238	208	AKQIQMVKQIGKGRY	P11277	1870	QTAYAGEKAEAIQNK	Q6ZMV9	435	LKKLLNDKKILENNT
O00257	197	AKSHPPDKWAQGAGA	P11277	1877	KAEAIQNKEQEVSAA	Q6ZMV9	436	KKLLNDKKILENNTV
O00257	205	WAQGAGAKGYLGAVK	P11277	1905	QLVDTADKFRFFSMA	Q6ZMV9	579	SVTIDDNKQILKQRF
O00267	718	RISQGPYKGYIGVVK	P11277	1983	ASEEIREKLQQVMSR	Q6ZMW3	558	KRGAKFRKYVGHSAH
O00267	725	KGYIGVVKDATESTA	P11277	1997	RRKEMNEKWEARWER	Q6ZN16	173	LKDMVTQKNTASSGN
O00329	852	AATAAFNKDALLNWL	P11277	214	AFNALIHKHRPDLID	Q6ZN66	620	KLIGHGVKGVSSLFK
O00370	271	NEMKAEIKMFFETNE	P11277	281	YHYFSKMKVLAVEGK	Q6ZN66	627	KGVSSLFKKHKLPF*
O00370	292	QNLWDAFKAVCRGKF	P11277	288	KVLAVEGKRVGKVID	Q6ZN84	362	IQQYQMLKDQEALFR
O00391	211	ALDLSQHKGVAVRRV	P11277	292	VEGKRVGKVIDHAIE	Q6ZNB6	146	TRELERTKQYVNEAF
O00391	372	KIPYSFFKTALDDRK	P11277	302	DHAIETEKMIEKYSG	Q6ZNB6	168	LICIASVKRNQAVWS
O00391	379	KTALDDRKEGAVLAK	P11277	355	RTVEKPPKFQEKGNL	Q6ZNE5	145	SEGLLKTKEKNQKLY
O00408	555	IAHSLLYKKVNEAQY	P11277	359	KPPKFQEKGNLEVLL	Q6ZP01	769	NADFSQLKLGDKDCR
O00408	556	AHSLLYKKVNEAQYR	P11277	46	LFERSRIKALADERE	Q6ZP82	616	QWQLFLKKSFITQDL
O00410	475	NFTEDCPKSLLIPYL	P11277	461	LAAVEAAKKKHEAIE	Q6ZP82	635	LNLINMAKENEILDV
O00410	487	PYLDNLVKHLHSIMV	P11277	462	AAVEAAKKKHEAIET	Q6ZP82	643	ENEILDVKNEVYLMK
O00421	280	KSSYNLDKSVHITKL	P11277	463	AVEAAKKKHEAIETD	Q6ZQQ2	1129	AGCESWDKRKSSFHN
O00444	792	IISEEERKTRSAPFF	P11277	532	ETTLALQKLFQDMLH	Q6ZQQ6	1622	KLAQAYVKITQDDRE
O00471	297	EQLEECRKSDAEQYL	P11277	548	IDWMDEIKAHLLSAE	Q6ZQQ6	2418	KQISWEDKKATVVEI
O00478	333	SLAYHEWKMALFKPA	P11277	569	EVEDLLQKHKLMEAD	Q6ZQX7	49	GAGTMGYKDNDGEEE
O00487	186	SNLGHLNKPSIQALI	P11277	57	DEREVVQKKTFTKWV	Q6ZR08	2899	SGSLLVGKVPEIWAK
O00499	146	RIAKRGRKLVDYDSA	P11277	583	DIAIQGDKVKAITAA	Q6ZR08	608	KENELMAKREKLILE
O00505	121	GILPILVKCLERDDN	P11277	641	EQSKRLWKFFWEMDE	Q6ZRF8	212	EQAVLAVKALQTATR
O00506	244	GQHSKPFKEFVEACL	P11277	654	DEAESWIKEKEQIYS	Q6ZRK6	746	PNSSPGGKTMCKNMS
O00512	74	KSGGHTPKALPGPGG	P11277	656	AESWIKEKEQIYSSL	Q6ZRP7	354	GAELKTLKDFVTVLA
O00512	86	PGGSMGLKNGAGNGA	P11277	680	LILQRKHKAFEDELR	Q6ZRP7	362	DFVTVLAKLFPGRPP
O00515	348	LQVKIPSKEEEADMS	P11277	729	SAQWDQLKDLAAFCK	Q6ZRR7	269	HLKEDLEKLNDQKCK
O00522	720	KQAGLVVKLLMKLNG	P11277	756	QGDADDLKAWLQDAH	Q6ZRR7	945	LDGNCISKIEGISKM
O00533	1104	LLTVCFVKRNRGGKY	P11277	786	RALGKKHKDFLEELE	Q6ZRV2	711	EKVQLLHKEQTVSET
O00533	305	ENVSYQDKGNYRCTA	P11277	80	CRITDLYKDLRDGRM	Q6ZS17	1027	LEDALGQKLPRRPQP
O00533	545	SKCDSHLKHSLKLSW	P11277	90	RDGRMLIKLLEVLSG	Q6ZSI9	234	ALRHALAKESLVGAT
O00533	653	IVEFEGNKEEPGRWE	P11277	926	HPRSREVKQYQDHLN	Q6ZSZ6	517	AGDAEKIKEESEDSL
O00533	669	LTRVQGKKTTVILPL	P11277	968	VDCEETSKWITDKTK	Q6ZT98	376	GVLLNALKLLNIRTS
O00566	381	LEKELLEKKPWQLQG	P11310	54	EFQATARKFAREEII	Q6ZTQ4	810	DPLTQMPKWKESSHQ
O00567	486	PKKKKKQKPQEVPQE	P11387	223	KWKFLEHKGPVFAPP	Q6ZTR5	48	RVIPAEVKFLDTMAG
O00567	505	DPSISFSKPKKKKSF	P11388	1196	EQVGLPGKGGKAKGK	Q6ZTZ1	77	RNAKVYEKMASKLFE
O00567	507	SISFSKPKKKKSFSK	P11388	1259	GVELEGLKQRLEKKQ	Q6ZU15	337	FQEIFEAKRQEFYDQ
O00592	385	SLICRAVKATFNPAQ	P11388	276	SYVDMYLKDKLDETG	Q6ZUS5	101	ENIQSSLKRKLQAMR
O00743	245	QLVHEGYKFMFDEKL	P11388	287	DETGNSLKVIHEQVN	Q6ZUS6	452	EASRPAAKASTPEDG
O00743	251	YKFMFDEKLVTVWSA	P11388	386	ENMTLQPKSFGSTCQ	Q6ZV73	958	RIADIFVKKGPYLKM
O00750	825	KLKDIMQKESLYWLT	P11388	400	QLSEKFIKAAIGCGI	Q6ZV73	959	IADIFVKKGPYLKMY
O00754	345	LVNAQQAKGSSVHVL	P11413	205	RIDHYLGKEMVQNLM	Q709C8	2841	VGSYGCVKCPANNME
O00757	218	SLNEGYAKYFDAATT	P11498	1119	IGAPMPGKVIDIKVV	Q70CQ1	609	AVVMHHGKGFGSGHY
O00763	435	VYDKGCVKDVDEGLE	P11509	112	ATFDWVFKGYGVVFS	Q70CQ2	1968	CKTYTMDKQPLNTGE
O14494	260	RTSFKERKEEDSHTT	P11532	297	SSPKPRFKSYAYTQA	Q70CQ2	1977	PLNTGEQKDMTEFFT
O14497	2159	VRFLSDRKNPVCREM	P11532	473	KTEERTRKMEEEPLG	Q70CQ2	2250	EENGREYKFDVSSEL
O14498	367	HGKAVEGKGCYTVDN	P11586	157	KGCLELIKETGVPIA	Q70CQ2	2272	NMQFLQDKNIFEHTY
O14511	166	ALVKVLDKWPLRSGG	P11586	262	DVAYDEAKERASFIT	Q70CQ3	60	WGPITERKKRRKGLV
O14524	121	NFFSSFLKEKLNDTY	P11586	56	SNLYINVKLKAAEEI	Q70CQ3	61	GPITERKKRRKGLVP
O14524	123	FSSFLKEKLNDTYVN	P11597	46	VLNHETAKVIQTAFQ	Q70CQ4	440	SPTQTAAKQGKMDSP
O14578	773	MINAMDSKIRSLEQR	P11684	72	LVDTLPQKPRESIIK	Q70EL1	1029	QEQLFQEKKDPANPS
O14639	254	HLGCFKCKSCGKVLT	P11717	1293	REPQGFHKVAGLLTQ	Q70YC5	207	AFVQLTQKKQEVQRR
O14639	258	FKCKSCGKVLTGEYI	P11908	243	LLSAGATKVYAILTH	Q71F78	127	AMTSQARKQNGGALI
O14639	563	PDPSETPKIETDHWP	P11926	78	NDSKAIVKTLAATGT	Q71RC2	476	ESKAPTPKFDLLASN
O14646	620	VDEAHRLKNDDSLLY	P11940	246	ERHEDAQKAVDEMNG	Q75N90	2025	FTRFEAGKCSVPKAF
O14647	1327	LLRKGLEKKGAVTGG	P12035	64	LYNLGGNKSISISVA	Q75QN2	101	WDLDILEKSLSVPVL
O14709	25	KGKDDTWKWGTSFQG	P12081	243	SSVDKLDKVSWEEVK	Q75QN2	120	NELLCISKVPPGTKH
O14733	245	GVIHRDVKPSNILLD	P12107	43	AAPVDVLKALDFHNS	Q75QN2	126	SKVPPGTKHVDMDLA
O14775	356	INVWDVLKGSRVSIL	P12111	2763	QRVILQAKCKGYFFV	Q75QN2	369	VLRELFKKAQQGNEA
O14776	392	IVSCPYVKTVATTKT	P12259	105	IKVHFKNKADKPLSI	Q75V66	579	CFYVAFFKGKFVGYP
O14782	630	QTRELKLKYLIIENF	P12259	121	PQGIRYSKLSEGASY	Q765P7	115	QERIEDWKKAANQLD
O14786	347	GTQGAISKETKKKYY	P12259	1801	LTSSEMKKSHEFHAI	Q76KX8	645	RNIHTGVKPYSCNEC
O14786	504	GIIIQGGKHRENKVF	P12259	205	LTEGGTQKTFDKQIV	Q76KX8	654	YSCNECGKVFSKNSI
O14788	129	AFQGAVQKELQHIVG	P12259	2185	FEGNTNTKGHVKNFF	Q76NI1	1519	SSESLSAKTCSLFLP
O14791	148	LKEFPRLKSELEDNI	P12259	389	NFSNQIGKHYKKVMY	Q7KYR7	173	ISRGWYPKPLTVWRD
O14791	167	ALADGVQKVHKGTTI	P12259	393	QIGKHYKKVMYTQYE	Q7KYR7	190	GGVAPALKEVSMPDA
O14791	373	ETAEELKKVAQELEE	P12259	77	EPYFKKEKPQSTISG	Q7L014	604	VIVIEEEKKFLKLLE
O14791	381	VAQELEEKLNILNNN	P12532	275	TRVISMEKGGNMKRV	Q7L014	828	FNSKKRVKDMAAPGT
O14791	390	NILNNNYKILQADQE	P12814	431	TATLSEIKALLKKHE	Q7L0Y3	150	KKARQIKKEMKAAAR
O14792	250	ASNFYFNKTKGFYCL	P12814	502	EALERTEKLLETIDQ	Q7L0Y3	153	RQIKKEMKAAAREEA
O14815	552	VLNAVLQKKKDIKFK	P12814	516	QLYLEYAKRAAPFNN	Q7L0Y3	161	AAAREEAKNIKLLET
O14815	553	LNAVLQKKKDIKFKK	P12814	603	TPQEINGKWDHVRQL	Q7L1I2	147	MCLSSSKKGMLGMIV
O14832	128	VQDFQEDKELFRYCT	P12882	1923	IAESQVNKLRVKSRE	Q7L273	331	NLRVATLKNAKLKNC
O14832	231	KWEGGVNKMFHGIQD	P12883	351	EEKNSMYKLTGAIMH	Q7L273	34	LLSVASSKLGIKATS
O14862	85	AKRLQEEKEKVDKQY	P12883	976	HATENKVKNLTEEMA	Q7L273	38	ASSKLGIKATSVYNG
O14867	640	EQIQILAKYSAADCP	P12883	991	GLDEIIAKLTKEKKA	Q7L2E3	54	LKEFPQPKNLLNSVI
O14879	11	VTKNSLEKILPQLKC	P12955	200	EVLRYTNKISSEAHR	Q7L3B6	133	WSTDAISKDVFNKSF
O14879	17	EKILPQLKCHFTWNL	P12955	303	GKFTADQKAVYEAVL	Q7L3B6	138	ISKDVFNKSFINQDK
O14936	20	ELCEVIGKGPFSVVR	P12956	570	ELKTHISKGTLGKFT	Q7L4E1	96	LPILLARKVPSVKKG
O14936	250	SHISESAKDLVRRML	P13473	280	RLNSSTIKYLDFVFA	Q7L592	307	DYGHDGTKTDTFRGF
O14936	756	GVGRRHIKNTLITKH	P13535	1168	SAQVELNKKREAEFQ	Q7L592	318	FRGFCDHKLHDVLIA
O14974	294	QNLLHSEKRDKKSPL	P13535	1732	SLINTKKKLENDVSQ	Q7L5Y6	316	QDGSAMAKRRFFQYF
O14974	297	LHSEKRDKKSPLIES	P13535	1757	ESRNAEEKAKKAITD	Q7L622	252	DYNAPDSKWEIKRCQ
O14974	318	NQSQKTFKNKETLII	P13584	45	TLAKAMDKFPGPPTH	Q7L7X3	429	PPQVSRHKSHYRNRE
O14976	573	EPITPHSKPILVRAV	P13611	170	LNFEAAQKACLDVGA	Q7LBR1	87	QTAVTMGKVTKSMAG
O14981	23	GTTPVTRKAAAQQLG	P13611	3291	HLTYTCKKGTVACGQ	Q7RTP6	1695	SSEGSSGKSKKRSSL
O14983	328	LGTRRMAKKNAIVRS	P13611	73	WSKIEVDKNGKDLKE	Q7RTT9	474	PMILAAGKVSPKQRE
O14983	329	GTRRMAKKNAIVRSL	P13611	79	DKNGKDLKETTVLVA	Q7RTY7	330	VNGSQRGKGILDMEK
O15013	623	CEVKQIAKAINERYL	P13612	641	SAKIGFLKPHENKTY	Q7Z2D5	407	TPRSPMGKENMVTFS
O15014	568	PARSATPKVRLVEPH	P13639	400	PLMMYISKMVPTSDK	Q7Z2W7	382	ESWIKWLKEILECSH
O15014	582	HSPSPSSKFSTKGLC	P13639	407	KMVPTSDKGRFYAFG	Q7Z2W7	395	SHLLTVIKMEEAGDE
O15014	586	PSSKFSTKGLCKKKL	P13646	389	ECQNQEYKMLLDIKT	Q7Z2X4	120	KPVIELWKKHTLARE
O15015	752	ETHFQGDKESGGTGE	P13647	472	VEIATYRKLLEGEEC	Q7Z2Y8	651	QNNLMEVKVKSESPE
O15015	764	TGEGLERKDASLLDN	P13667	109	EKIANILKDKDPPIP	Q7Z2Z1	672	RNMISTVKMFLKSKG
O15020	121	HCLENVDKALQFLKE	P13667	234	SPPIPLAKVDATAET	Q7Z309	165	PSVLGPLKRKGEMET
O15020	179	NKEKKSAKDALLLWC	P13667	582	QKGLVIAKMDATAND	Q7Z398	322	FECKECEKAFSNRAH
O15021	1820	LSGPQASKTELPSPE	P13667	616	GDKKNPVKFEGGDRD	Q7Z3T8	1452	STSYQFAKEIAMACS
O15021	315	SSCSSQEKLHQLPYQ	P13667	629	RDLEHLSKFIEEHAT	Q7Z3T8	1476	LKSNGMNKIGLRVSI
O15031	1250	ESVRDRCKKEFTDLM	P13671	183	TKAVCTRKYNPIPSV	Q7Z406	934	RGRLAARKQELELVV
O15034	338	SYNVLVDKETRMNLT	P13671	251	QTAEDDLKTDFYKDL	Q7Z410	379	CAGYLDGKVDSCQGD
O15042	159	EKRGKIYKPSSRFAD	P13671	288	VPIFYSSKRSENINH	Q7Z410	728	YTRITRLKGWILEIM
O15061	362	RNLFSRQKAPLASFN	P13671	300	INHNSAFKQAIQASH	Q7Z417	320	KKFDDRPKGKHASAV
O15068	189	KFNRDDFKMKVPVIM	P13671	330	LNFTTKAKDLHLSDV	Q7Z417	322	FDDRPKGKHASAVAS
O15068	209	DLHGYIDKSQLTEDL	P13671	340	HLSDVFLKALNHLPL	Q7Z417	330	HASAVASKEDSWTLF
O15078	1004	ECENISLKEQVESIN	P13671	397	GLTEEEAKHCVRIET	Q7Z494	1192	ILYKKMGKLDKAVPL
O15083	508	EKESFLNKKTKQLQD	P13671	424	EHRCTTNKLSEKHEG	Q7Z4L5	1136	CLMATKQKSNVEQAL
O15083	570	TNLKDRVKSLQTDSS	P13671	428	TTNKLSEKHEGSFIQ	Q7Z4L5	1154	TEIAASEKEHIPALL
O15083	593	LEEALSEKERIIERL	P13671	439	SFIQGAEKSISLIRG	Q7Z4S6	119	GIISRAVKHLFKSIE
O15090	461	GKGELPMKEKEALGK	P13671	459	GAALAWEKGSSGLEE	Q7Z4S6	851	VAGKVTRKLSSSDAP
O15090	485	HGVPEGDKHSLLGCL	P13671	467	GSSGLEEKTFSEWLE	Q7Z569	78	DVIIETMKSNPDELK
O15105	70	GKAVRGAKGHHHPHP	P13671	509	TKRNNLRKALQEYAA	Q7Z589	610	LLNAGGEKTIQTVPT
O15145	37	GPAPRETKDTDIVDE	P13671	899	GNQLYCVKMGSSTSE	Q7Z589	620	QTVPTGAKPAILTAT
O15145	50	DEAIYYFKANVFFKN	P13671	907	MGSSTSEKTLNICEV	Q7Z5L2	229	RVFSSVMKPENMIVP
O15160	332	AIKVLMGKCRRFLDE	P13671	923	TIRCANRKMEILHPG	Q7Z5L2	238	ENMIVPIKLSSDSEI
O15164	892	PSHNSEKKKTEGLVK	P13716	252	GADMLMVKPGMPYLD	Q7Z5L2	32	RRGAVLLKTGDEEES
O15164	905	VKLTPIDKRKCERLL	P13796	361	DVVRGNPKLNLAFIA	Q7Z5L3	267	YVKLDGGKAHGGNNN
O15205	70	LSSYGIDKEKTIHLT	P13796	542	SSSISSFKDPKISTS	Q7Z5M5	452	RTAPEEEKWSTSRPG
O15205	72	SYGIDKEKTIHLTLK	P13796	82	IKIFHGLKSTDVAKT	Q7Z5M8	159	RAASHRLKLVKVLSD
O15205	79	KTIHLTLKVVKPSDE	P13798	172	VAEKKRPKAESFFQT	Q7Z5M8	162	SHRLKLVKVLSDGGF
O15211	437	PYLGTFLKDLVMLDA	P13798	434	PSLPPTLKVGFLPSA	Q7Z601	354	GLQPRVGKSTAILLG
O15213	384	SGLDHQLKIFDLRGT	P13805	248	MAKLKQQKYEINVLY	Q7Z695	423	IPVDLKRKIARLGIN
O15228	507	QMTPGFRKEDVYSCF	P13866	585	ENIQEGPKETIEIET	Q7Z6G8	207	LAARNGHKAVVQVLL
O15229	138	HFNHRLLKCNPEEGM	P13929	64	YLGKGVLKAVENINN	Q7Z6G8	724	GRIRSLPKALIDMHL
O15265	858	SKPTKVAKVPAVNNV	P13929	80	LGPALLQKKLSVVDQ	Q7Z6G8	733	LIDMHLSKSVSKSDS
O15294	742	VLNGIDLKAFLDSLP	P13987	66	QVYNKCWKFEHCNFN	Q7Z6G8	750	IAYPSNEKTSRVNWS
O15294	752	LDSLPDVKIVKMKCP	P14151	78	AEIEYLEKTLPFSRS	Q7Z6J0	24	ERLDASAKVLPCQHT
O15327	453	SLKMLSEKTELFVHA	P14314	196	EAKEQHQKLWEEQLA	Q7Z6J4	392	HSFLVSGKQRTLELQ
O15353	377	AVRKSMAKPEELDSL	P14314	385	EEAERSLKDMEESIR	Q7Z6R9	315	CETEFPAKAVGEHLA
O15381	199	CEKSNPKKPITEIQD	P14314	431	VYRLCPFKLVSQKPK	Q7Z6Z7	1715	KEMDIKRKENKGNDT
O15403	488	HHHSGETKVVSHRGK	P14410	683	GQNSLLVKSSRQYLT	Q7Z6Z7	1718	DIKRKENKGNDTPLA
O15409	74	QQQTSGLKSPKSSDK	P14415	276	ATDDERDKFAGRVAF	Q7Z6Z7	1741	ETSLEETKIGEILIQ
O15438	938	KVQVTEAKADGALTQ	P14616	712	QEASFQKKFENFLHN	Q7Z6Z7	4221	RMTGAIRKQLAAFLE
O15457	522	MISQLGEKYSLPLRT	P14616	729	TIPISPWKVTSINKS	Q7Z7G0	5	***MRGGKCNMLSSL
O15480	154	NCFPEILKKASFNME	P14616	735	WKVTSINKSPQRDSG	Q7Z7G8	2586	VSSDVVEKLLDCTVI
O15480	155	CFPEILKKASFNMEV	P14618	66	ETLKEMIKSGMNVAR	Q7Z7L7	433	YRSEQSVKLRRQVIQ
O15484	276	LAFFKSEKLDMIRLR	P14625	455	RETLQQHKLLKVIRK	Q7Z7M9	349	KTKTIFPKVLGKSQS
O15484	555	KVRSAVQKGTSTPEY	P14625	593	KRFQNVAKEGVKFDE	Q86SQ7	468	LNKTNMEKDEAEKEH
O15492	17	TTCLERAKEFKTRLG	P14625	633	ALKDKIEKAVVSQRL	Q86SQ7	473	MEKDEAEKEHREFRA
O15498	53	LIVERSSKGTRASVK	P14780	76	PALLLLQKQLSLPET	Q86T65	778	RLAEAKPKVEAILLA
O15544	47	TLGQGGWKLLGIVGS	P14868	213	FRETLINKGFVEIQT	Q86T82	251	REKQLSLKQSEENRT
O43147	9	GSAEDAVKEKLLWNV	P14868	222	FVEIQTPKIISAASE	Q86T82	564	RVLILHLKRYSFNVA
O43148	137	ALEDVPEKQKNLEEG	P15144	104	DRGLYVFKGSSTVRF	Q86T90	555	PLKSTRKKMGMHRTP
O43151	1262	NCYNRSIKQEPVDPL	P15144	125	DVIIIHSKKLNYTLS	Q86TB3	1760	AFLKKMPKLETSLSH
O43151	1284	RDAGKMGKTPLSEVS	P15144	172	HLKGSLVKDSQYEMD	Q86TB3	1771	SLSHTEEKQDPKKPS
O43166	406	SMDQGDDKSNELVMS	P15144	205	YMEGNVRKVVATTQM	Q86TB3	1775	TEEKQDPKKPSCKRE
O43184	375	SCQMAVEKGGCIMNA	P15144	379	LSSSSSNKERVVTVI	Q86TB3	2087	DMQGVGMKLTDVGIA
O43237	50	VSTRARSKLPSGKNI	P15144	719	SEVYGPMKNYLKKQV	Q86TL0	241	ELGQSSGKKAGDWYG
O43237	55	RSKLPSGKNILVFGE	P15151	144	IWLRVLAKPQNTAEV	Q86TM3	584	KMAGELIKILDRANQ
O43237	67	FGEDGSGKTTLMTKL	P15151	153	QNTAEVQKVQLTGEP	Q86TZ1	343	QDINAAMKISTTAEF
O43255	129	IRNLAMEKVASAVLF	P15153	166	ALTQRGLKTVFDEAI	Q86U17	136	PSPKLELKVGNSLFL
O43290	54	GSGGERRKRSRERGG	P15169	144	AAAQGPNKPGYLVGR	Q86U86	511	TSDTGSAKRKSKKNI
O43295	1086	PAVTPTEKMFPNSSA	P15169	249	STPTPDDKLFQKLAK	Q86UK0	104	GIDDALFKDSEILRK
O43299	56	FLIISATKYSRRLEK	P15169	253	PDDKLFQKLAKVYSY	Q86UK5	433	RKMSAVFKKQFLLLE
O43307	370	KGRIDMDKYEVVDIE	P15169	37	DLVRTLYKVQNECPG	Q86UP0	105	TGNIHVTKSLDREEK
O43312	36	VWEDFINKAGKLQSQ	P15311	254	NISFNDKKFVIKPID	Q86UP2	64	AEKKKNKKKEIQNGN
O43312	39	DFINKAGKLQSQLRT	P15311	306	TIEVQQMKAQAREEK	Q86UQ4	3107	EANISHSKVLFSALT
O43325	50	EARTLFRKNKNLTDT	P15311	83	LQFKFRAKFYPEDVA	Q86UR5	610	NKRTTMPKDSGALLG
O43345	943	KKTHAGEKFYKCEAC	P15538	357	SISEHPQKATTELPL	Q86UV5	282	SKQNATRKIRLLSLP
O43345	946	HAGEKFYKCEACGKA	P15735	27	FYQKYDPKDVIGRGV	Q86UW8	279	PGRVFFLKPLRPVPF
O43374	350	RSNSLASKSMESFLK	P15822	1107	PEQTMDPKLSTIMEQ	Q86V15	311	NLVARASKYDFFIQK
O43390	114	QREKQGSKVQESTKG	P16035	107	VSLDVGGKKEYLIAG	Q86V25	293	YARDMRMKILKPASA
O43395	205	DAIEKARKAAELQAR	P16035	67	DIYGNPIKRIQYEIK	Q86V25	296	DMRMKILKPASAHSP
O43395	220	IQAQLALKPGLIGNA	P16070	38	AGVFHVEKNGRYSIS	Q86VB7	882	INPASLDKAMSIPMW
O43423	64	ISDLPKLKLRKLELR	P16157	110	NVNAQSQKGFTPLYM	Q86VD1	104	GQYGNGLKSGSMRIG
O43424	187	GIQEFLDKVSQQGMD	P16157	1105	NAVTKRVKLALQAQP	Q86VD1	112	SGSMRIGKDFILFTK
O43432	764	KVRSILNKLTPQMFN	P16157	1120	VPDELVTKLLGNQAT	Q86VD1	665	VALPENVKLAERSQR
O43451	868	TKDTVANKVYLLCEF	P16157	1231	NFATLLYKELTAVPY	Q86VD1	774	SSSLPSWKSLLNVPM
O43462	68	FYSWGRRKARMLYQW	P16157	1241	TAVPYMAKFVIFAKM	Q86VE0	62	VWDGIAAKINGITSW
O43462	96	SSFFLLGKTLMQTLA	P16157	1247	AKFVIFAKMNDPREG	Q86VF7	1104	LQSDVNYKKGFEHSK
O43491	239	CDLEKHAKGQVLFDK	P16157	1265	CYCMTDDKVDKTLEQ	Q86VF7	1105	QSDVNYKKGFEHSKA
O43493	449	NVFPAPPKRSFLPQV	P16157	1268	MTDDKVDKTLEQHEN	Q86VI3	1128	NLLAMTDKFLLAITS
O43505	386	ALKFHPQKEAENQHN	P16157	128	ENHLEVVKFLLENGA	Q86VP3	413	PPSGRITKTESLVIP
O43520	88	NTKFLCIKESKYANN	P16157	1345	GSLSFLRKAMKYEDT	Q86VP6	355	KVRRAAAKCLDAVVS
O43520	91	FLCIKESKYANNAIK	P16157	27	ARSGNLDKALDHLRN	Q86VP6	801	QSYYSIAKCVAALTR
O43602	234	KLYTLDGKQVTCLHD	P16157	355	CGHHRVAKVLLDKGA	Q86VQ3	19	VKAGASGKPEMRLGT
O43602	275	ENECRVMKGNPSATA	P16157	360	VAKVLLDKGAKPNSR	Q86VQ3	5	***MDVDKELGMESV
O43639	59	PSNYVERKNSLKKGS	P16157	363	VLLDKGAKPNSRALN	Q86VR7	231	VVWRRGSKVLAAGGL
O43707	122	ALDFIASKGVKLVSI	P16157	380	TPLHIACKKNHVRVM	Q86VY4	169	VIAGGRQKKGAAGEN
O43707	323	LEDRVPQKTIQEMQQ	P16157	392	RVMELLLKTGASIDA	Q86VY9	15	ITGLAALKRQDSARS
O43707	432	HEAWTDGKEAMLKHR	P16157	421	MGHLPIVKNLLQRGA	Q86W25	856	RLQDDGIKLLCAALT
O43707	450	TATLSDIKALIRKHE	P16157	454	AGHTEVAKYLLQNKA	Q86W25	866	CAALTHPKCALERLE
O43719	679	LFEESDDKEDEDADG	P16157	462	YLLQNKAKVNAKAKD	Q86W26	556	KEQMESMKHNRTWDL
O43719	687	EDEDADGKEVEDADE	P16157	466	NKAKVNAKAKDDQTP	Q86W28	478	KEDLEEAKLDQTGVT
O43719	695	EVEDADEKLFEDDDS	P16157	487	IGHTNMVKLLLENNA	Q86WI1	1298	DIRCLLPKLSPGKHD
O43731	64	SIYNTVMKVVFLLCA	P16157	535	SQACMTKKGFTPLHV	Q86WI3	200	GAIMGDVKVEDGADV
O43752	118	VQALAERKNRQALLG	P16157	54	NGLHLASKEGHVKMV	Q86WR0	115	QIGFHRQKDVKIVTV
O43765	103	TEGNEQMKVENFEAA	P16157	545	TPLHVAAKYGKVRVA	Q86WR0	125	KIVTVEKKVNEILNR
O43781	481	KRGPPGSKDWGTALK	P16157	586	HNNLDIVKLLLPRGG	Q86WT1	557	IGTLYCAKGNYEFGI
O43790	111	QEEKEQIKSLNSRFA	P16157	59	ASKEGHVKMVVELLH	Q86WT1	576	KSLEPYNKKLGTDTW
O43790	191	QEVLEGYKKKYEEEV	P16157	611	TPLHIAAKQNQVEVA	Q86X10	872	ELGISGSKSKNNEQE
O43790	192	EVLEGYKKKYEEEVS	P16157	666	ANGNLGNKSGLTPLH	Q86X10	874	GISGSKSKNNEQEVK
O43790	193	VLEGYKKKYEEEVSL	P16157	67	MVVELLHKEIILETT	Q86X27	572	SAACQSNKQQVPTNL
O43823	428	ISTKLPDKTVEFLQE	P16157	689	PVADVLIKHGVMVDA	Q86X45	224	TLSSLESKDHLQAPD
O43829	229	SMETPESKDLGSQTP	P16157	715	ASHYGNIKLVKFLLQ	Q86XA9	1251	IALAQEMKKRDSRND
O43829	249	NDGMSEVKDEQTPGW	P16157	718	YGNIKLVKFLLQHQA	Q86XA9	1252	ALAQEMKKRDSRNDF
O43854	363	ARLDKQGKVNAWTSG	P16157	730	HQADVNAKTKLGYSP	Q86XA9	1642	CAAQEHVKEKRRSAE
O43854	397	GIITQGAKDFGHVQF	P16157	755	DIVTLLLKNGASPNE	Q86XA9	1644	AQEHVKEKRRSAEVD
O43897	564	VSDGTVNKAGFAANF	P16157	76	IILETTTKKGNTALH	Q86XD8	184	HLHVLRRKGEHRMSG
O43900	154	TALEEEEKKELRAFS	P16157	77	ILETTTKKGNTALHI	Q86XE0	100	DFEASREKLQKLGEG
O43900	402	TASFSAVKGASETTT	P16157	775	TTPLAIAKRLGYISV	Q86XE0	103	ASREKLQKLGEGDSS
O43927	2	******MKFISTSLL	P16233	390	SKQYEIFKGTLKPDS	Q86XE0	288	VASDEDLKLSDMLRY
O60220	29	FIEVETQKQRFQQLV	P16233	416	VGDLQMVKFIWYNNV	Q86XE0	304	MRDSQAAKDLLYRRL
O60229	730	DSAVSNNKTPHSSSI	P16234	703	HHPEKPKKELDIFGL	Q86XM0	455	SDGNTKYKLDIFLKQ
O60238	187	IFSAEFLKVFIPSLF	P16260	86	ALRAVPQKEGFLGLY	Q86XM0	478	SNFTSSLKKATMSTL
O60266	973	PKFRVITKIKTIGST	P16401	67	LSLAALKKALAAGGY	Q86XR8	467	TNKKDFMKLRPGEKR
O60266	975	FRVITKIKTIGSTYM	P16402	35	GATAGKRKASGPPVS	Q86XX4	3543	IEFKTHAKFRGQFVM
O60271	725	GLDTEGSKQRSASQS	P16403	136	KKPVGAAKKPKKAAG	Q86Y38	518	DDLVTKMKQFYSYTL
O60279	353	PSGPFVGKNDSKAGD	P16403	172	TVTKKVAKSPKKAKV	Q86YA3	1463	FYNEPKTKLYLKLSR
O60281	1660	TTMGLIAKSVEIPTT	P16403	175	KKVAKSPKKAKVAKP	Q86YC2	73	QLKHSEPKNKICVYD
O60281	2543	EKNVSQNKKRKVEKA	P16403	199	AVKPKAAKPKVVKPK	Q86YC2	75	KHSEPKNKICVYDKL
O60281	2544	KNVSQNKKRKVEKAE	P16403	201	KPKAAKPKVVKPKKA	Q86YP4	633	IPQSATWK*******
O60282	274	SALAEGTKTHVPYRD	P16403	21	PAEKAPVKKKAAKKA	Q86YS3	280	YCSQCCKKINLLNDL
O60282	766	EDQEREMKLEKLLLL	P16403	22	AEKAPVKKKAAKKAG	Q86YT6	949	NVNADVQKLQQQLQD
O60292	1734	QLHTDLQKEKQDKVV	P16403	23	EKAPVKKKAAKKAGG	Q86YT6	958	QQQLQDIKEQTMCPV
O60292	573	DATPTATKHGTGRGL	P16403	27	VKKKAAKKAGGTPRK	Q86YW0	85	NTYSENRKILLASNL
O60293	1154	HSPLLVFKSYRFSPY	P16435	404	SEQELLRKMASSSGE	Q8HWS3	258	VYQGCISKDKVDTLI
O60303	507	FFDLNDTKLYVSPHD	P16452	150	REDAVFLKNEAQRME	Q8HWS3	260	QGCISKDKVDTLIMM
O60306	228	FLSQLIQKFISVLKS	P16452	204	SKDKQVEKWSQPVHV	Q8IU60	312	SEMSDLLKGKNQSMR
O60313	554	AVSDCFWKMVRESVE	P16452	223	GALLHFLKEQRVLPT	Q8IUC4	88	NSDLQMLKEELEGLN
O60331	37	AAGLAQKKAAPTEVL	P16452	24	NNEEHHTKALSSRRL	Q8IUD2	643	RDRDEREKQEEIDNY
O60333	228	FTIVFTQKKHDNETN	P16452	372	LVPVRAVKEGTLGLT	Q8IUD2	655	DNYKKDLKDLKEKVS
O60333	229	TIVFTQKKHDNETNL	P16452	436	EDITQNYKYPEGSLQ	Q8IUE0	22	VEKDSPAKTQSPAQD
O60346	527	LIRFYAGKPHSTGSS	P16452	445	PEGSLQEKEVLERVE	Q8IUG5	1649	GQLQQQLKQKEQEAS
O60361	109	IHGSDSVKSAEKEIS	P16452	480	SPLYLLLKAPSSLPL	Q8IUG5	1825	LGTMEDGKTSVSKEE
O60361	85	ETNPADSKPGTIRGD	P16452	529	LAAKLWRKKLHLTLS	Q8IUR6	216	SSTQIMVKTNMYHNE
O60384	10	LSTSPYRKGSQCGEA	P16452	530	AAKLWRKKLHLTLSA	Q8IUR6	493	EDLTPNPKKLLQIGN
O60384	28	IPGHNLNKKTPPGVK	P16452	58	AFLPALKKVALTAQT	Q8IUY3	277	WGPACPKKMPNCSPT
O60422	493	GATATFSKA******	P16452	597	LAIKMPEKAEQYQPL	Q8IVF2	1167	DSRFKMPKFKMPSFG
O60437	563	LLRIEPEKTRSTAEG	P16452	71	QTGEQPSKINRTQAT	Q8IVF2	1192	SVDVSAPKVEADVSL
O60443	83	DFVKYEGKFANHVSG	P16452	88	ISSLGDRKWWSAVVE	Q8IVF2	1903	VPEGAGLKGHLPKVD
O60447	393	QFDGVPDKLIQAAYQ	P16615	135	KVYRQDRKSVQRIKA	Q8IVF2	1908	GLKGHLPKVDMPSFK
O60486	817	APSLKSSKVRTNVTV	P16615	141	RKSVQRIKAKDIVPG	Q8IVF2	3337	SVDVSAPKAEADVSL
O60486	825	VRTNVTVKLRVQDTY	P16615	460	NVFDTELKGLSKIER	Q8IVF2	636	TEEGLKDKEDSDSMT
O60488	500	ICCEIKLKDWQEGGY	P16615	476	NACNSVIKQLMKKEF	Q8IVF2	839	KFKMPKFKMPSFGVS
O60502	497	AKMAEELKPMDTDKE	P16615	481	VIKQLMKKEFTLEFS	Q8IVF4	3121	NKVIAMEKAEAETTL
O60518	16	VPATVSEKQEFYQLL	P16615	683	ARVEPSHKSKIVEFL	Q8IVF4	3139	MPILEAAKLELQKLD
O60522	709	KTGEGEQKAKRENKT	P16930	181	RRPMGQMKPDDSKPP	Q8IVF6	769	SECVNLAKDNEVLHQ
O60522	711	GEGEQKAKRENKTTS	P17019	431	SSHLTTHKIIHTGEK	Q8IVG5	1095	LARHFYIKEKDFNTA
O60522	715	QKAKRENKTTSVSKA	P17019	438	KIIHTGEKPYKCKEC	Q8IVG5	1097	RHFYIKEKDFNTALD
O60603	404	NHLASLEKTGETLLT	P17019	441	HTGEKPYKCKECGKA	Q8IVG5	397	KKESEGLKLVKLLIG
O60610	133	SQYLYTSKAGMSQKE	P17022	143	GQDILSEKMESPSCQ	Q8IVJ1	92	PAPPSPLKETSFSIG
O60656	75	RSLNCTVKTYSTSYT	P17039	487	DVKPYECKECGKTFS	Q8IVL0	1917	HKDGRSVKIIVSISK
O60662	31	KDLLDEKKFIDCTLK	P17066	514	NDKGRLSKEEVERMV	Q8IVL1	1329	LRRLFGGKPTKQVPI
O60662	72	EIDEAKKKEVVLDNV	P17213	123	IKISGKWKAQKRFLK	Q8IVL1	1332	LFGGKPTKQVPIATA
O60662	89	AILDLIIKYLYSASI	P17213	126	SGKWKAQKRFLKMSG	Q8IVL1	1513	LDRNTLPKKGLRYTP
O60673	1536	VLKELLQKRQQKAQN	P17600	279	HAHSGMGKVKVDNQH	Q8IVT5	169	YALTCLRKVTGLGGE
O60673	2208	STPIIQRKLLERLPE	P17600	281	HSGMGKVKVDNQHDF	Q8IVT5	178	TGLGGEHKEDSSWSS
O60674	1055	FTYIEKSKSPPAEFM	P17612	267	SHFSSDLKDLLRNLL	Q8IVU1	236	GSGSGAYKEPAILVG
O60674	1069	MRMIGNDKQGQMIVF	P17612	84	KQKVVKLKQIEHTLN	Q8IVU9	23	AMSLQNLKTLHMSLE
O60687	211	YWDPPLVKDSADGTI	P17643	233	YHLLRLEKDMQEMLQ	Q8IVW4	246	LPQVQHPKNARKKYP
O60704	216	DCLTKWNKAIEVMYA	P17643	255	YWNFATGKNVCDICT	Q8IW35	557	QDKVALQKLNDAATK
O60729	271	NKRMYDAKRFTDAGF	P17735	64	RAIVDNMKVKPNPNK	Q8IW41	257	IPKDMRRKIMTGSFE
O60733	261	YPIHSAMKFSQKGCA	P17735	66	IVDNMKVKPNPNKTM	Q8IW41	278	SQISEMAKDVVRKLL
O60733	265	SAMKFSQKGCAEMII	P17735	71	KVKPNPNKTMISLSI	Q8IW75	175	QNLEMAQKQINDFIS
O60733	489	CLDGGGVKGLIIIQL	P17858	16	LRASGAGKAIGVLTS	Q8IWA4	608	IVGGVIWKTIGWKLL
O60759	76	DFSWSQRKLVTVEKQ	P17900	88	KVDLVLEKEVAGLWI	Q8IWA6	200	STIKKINKDKSMGQK
O60809	131	CSPEAMSKRQTVEDC	P17927	1293	CDEGFRLKGSSVSHC	Q8IWB6	431	APEVILQKAATVKSD
O60814	109	LLPGELAKHAVSEGT	P17936	164	THRVSDPKFHPLHSK	Q8IWC1	639	KKSKDMAKEAVGGQA
O60814	117	HAVSEGTKAVTKYTS	P17936	171	KFHPLHSKIIIIKKG	Q8IWD4	85	DDDCPVRKKRITEAE
O60814	12	AKSAPAPKKGSKKAV	P17936	278	PLPGYTTKGKEDVHC	Q8IWI9	1350	NWEEDRNKILSILSQ
O60814	13	KSAPAPKKGSKKAVT	P17947	237	RALRNYGKTGEVKKV	Q8IWJ2	1136	VQLQKQKKQLQKTMQ
O60814	16	PAPKKGSKKAVTKAQ	P17947	242	YGKTGEVKKVKKKLT	Q8IWJ2	1149	MQELELVKKDAQQTT
O60832	302	SHKRLVMKDSAVNAI	P18206	1024	QCAKDIAKASDEVTR	Q8IWJ2	1150	QELELVKKDAQQTTL
O60840	1582	EEEVTVGKFYATFLI	P18206	488	VANSRPAKAAVHLEG	Q8IWJ2	1175	LMKELNQKLTNKNNK
O60844	107	KYKWYLKKLLFVTDK	P18206	59	SNLVRVGKETVQTTE	Q8IWJ2	764	TQLYGFLKEMGSEVS
O60870	311	IVKEVIDKYTAVVKM	P18206	607	SDTTTPIKLLAVAAT	Q8IWJ2	792	AVGESLAKINEEKCN
O60870	324	KMIDSGDKLKLDQTH	P18206	639	NFENHSGKLGATAEK	Q8IWL3	182	AESEAAMKEIESIVK
O60870	341	TVIPAPGKRILVLNG	P18206	646	KLGATAEKAAAVGTA	Q8IWL3	189	KEIESIVKAKQKEFT
O75015	138	WKNTALHKVTYLQNG	P18206	655	AAVGTANKSTVEGIQ	Q8IWL3	191	IESIVKAKQKEFTDN
O75015	40	QWYSVLEKDSVTLKC	P18206	699	YEHFETMKNQWIDNV	Q8IWU9	54	KGNKGSSKREAATES
O75037	664	QRRLQTLKHQYEEKL	P18206	792	AASDELSKTISPMVM	Q8IWU9	71	TAVVFSLKNEVGGLV
O75044	143	GRLFKKSKEVGQQLQ	P18206	802	SPMVMDAKAVAGNIS	Q8IWV1	360	QSEDSQMKHREEMSN
O75044	155	QLQDDLMKVLNELYS	P18206	815	ISDPGLQKSFLDSGY	Q8IWV2	226	VMGEYEPKIEVQFPE
O75044	165	NELYSVMKTYHMYNA	P18428	319	SNIRLTTKSFRPFVP	Q8IWV2	239	PETVPTAKGATVKLE
O75064	116	YEGKERPKPGFQVLD	P18428	37	LVARITDKGLQYAAQ	Q8IWV2	244	TAKGATVKLECFALG
O75093	886	SWVKTGYKEPGIARC	P18428	412	GKVKVELKESKVGLF	Q8IWY4	572	CEADCLRKRAEQSLQ
O75093	902	GPQDMEGKLLLTTPA	P18428	443	FYPKFNDKLAEGFPL	Q8IWZ5	366	NILKNSFKADKEAKR
O75094	258	FNVADVQKKEYVCPA	P18433	317	FIAAQGPKEETVNDF	Q8IWZ5	411	SRQKEIEKYVYVTTM
O75096	925	YWADAGMKTIEFAGL	P18433	343	IVMVTNLKERKECKC	Q8IWZ5	419	YVYVTTMKVNEMDGL
O75112	235	PGGSLPIKDLAVDSA	P18433	538	NGLEEEFKKLTSIKI	Q8IX12	1113	QFENQMNKTIRNLST
O75116	659	EEDLKNGKILLAKVE	P18510	70	PNVNLEEKIDVVPIE	Q8IX19	173	NIDTKVQKILEVLQK
O75116	664	NGKILLAKVELEKRQ	P18510	89	FLGIHGGKMCLSCVK	Q8IX19	180	KILEVLQKMPQSSPQ
O75132	215	LVQKVASKIPSPDRI	P18577	235	LRSPIQRKNAMFNTY	Q8IX30	395	GRLHWNGKDCTEPLK
O75132	244	SDMSVSEKCGREEAL	P18577	409	FDDQVFWKFPHLAVG	Q8IX90	205	VKVLKTPKCALKMDD
O75140	118	RGDMWRLKKSLVSTC	P18754	335	LGEGAEEKSIPTLIS	Q8IXF0	482	TEDNENSKSDEKGNQ
O75152	481	LEEIKLEKALRVQQS	P18850	629	DTRILHIKSSSVPPY	Q8IXF0	486	ENSKSDEKGNQSENS
O75152	521	RTGMKEEKNLQEGNE	P19021	712	NGRIQCFKTDTKEFV	Q8IXH8	143	VVERSTGKIVDTSLI
O75152	553	TTGVDITKIQVKRCE	P19022	472	ENQVPLAKGIQHPPQ	Q8IXL6	264	RITSVAMKSGGTQLK
O75153	271	TAYHFNPKPASPRFL	P19174	925	ELQDWVKKIREVAQT	Q8IXQ4	153	IIGPMPAKGPVNYNV
O75159	298	AQVNPLYKLGPKLAP	P19256	62	LWKKQKDKVAELENS	Q8IXQ4	166	NVTTEFEKRAQRMKE
O75164	506	LVFSGSKKKSSSSLG	P19320	154	RLEIDLLKGDHLMKS	Q8IXQ5	509	DIKLNEWKMVSPMPW
O75164	507	VFSGSKKKSSSSLGS	P19320	176	DRKSLETKSLEVTFT	Q8IXS0	50	RDGAAGGKINKNYLE
O75165	1345	EGRDMFEKVNKAYEF	P19320	198	KVLVCRAKLHIDEMD	Q8IXT1	947	KSSGWISKCPDIQVL
O75165	1502	TEMPSIIKDLCRVLY	P19320	486	KALVCQAKLHIDDME	Q8IY17	893	NTAVRALKQLVLLHR
O75165	78	TFRKGSGKKSETLKF	P19320	497	DDMEFEPKQRQSTQT	Q8IY18	895	TIVQEYTKREEEIEQ
O75165	79	FRKGSGKKSETLKFS	P19634	750	GLSRDPAKVAEEDED	Q8IY21	1077	RKYEESLKAELTSWI
O75165	84	GKKSETLKFSTEHRT	P19652	148	GLSFYADKPETTKEQ	Q8IY22	646	TRLTLPSKSTDADLA
O75170	790	SRSQGPEKASQASYF	P19652	179	DVMYTDWKKDKCEPL	Q8IY33	419	RTQQARNKFFQTSAV
O75170	814	WNVCVTRKAPLLASD	P19652	42	TLDRITGKWFYIASA	Q8IY33	445	TPSLVLSKDSSKEQA
O75179	2004	QLFVTVVKTSNATTT	P19823	133	KTFRSSIKEKTVGRA	Q8IY42	144	LEGGGTRKQDCVLLA
O75179	2035	TYPMPTAKEHYPVSS	P19823	135	FRSSIKEKTVGRALY	Q8IY47	255	GLYKSMPKFFKPRLG
O75182	239	GQFLPEAKRSLFTGN	P19823	150	AQARAKGKTAGLVRS	Q8IY57	131	TVIITDFKEKTKSPP
O75326	117	TVNIGSTKGSCLDKR	P19823	176	VNVLPGAKVQFELHY	Q8IY92	1575	IMETPVLKKELDRFG
O75326	280	ESSLSVSKWNTFLKA	P19823	190	YQEVKWRKLGSYEHR	Q8IY92	1576	METPVLKKELDRFGV
O75326	298	CSDAATNKNFNRLQD	P19823	207	LQPGRLAKHLEVDVW	Q8IY92	176	SPNLSREKTRENVPN
O75326	352	VFRTSSLKGYHSSLP	P19823	242	DGVPVISKGQQKAHV	Q8IY95	211	PDILEEEKIYAYPSN
O75326	405	KTPLFHSKYHYQKVA	P19823	246	VISKGQQKAHVSFKP	Q8IYB1	314	MQAYQACKAIIIKLL
O75334	288	NYEMAQMKERLAALS	P19823	252	QKAHVSFKPTVAQQR	Q8IYB8	409	GTKLAQAKKFNDPND
O75344	218	QHLVEAAKLPVLLNL	P19823	284	YDVKREEKAGELEVF	Q8IYB8	410	TKLAQAKKFNDPNDP
O75351	311	HARAAMFKLHLGTTQ	P19823	327	SMWGVKMKQTVEAMK	Q8IYB8	445	IIFYSLIKPSINEKG
O75352	21	VPILLPEKCYDQLFV	P19823	334	KQTVEAMKTILDDLR	Q8IYD8	1717	SGSSAQSKVRSTPRV
O75362	534	TDVAAEVKNDGKNQD	P19823	367	NDLISATKTQVADAK	Q8IYD9	166	LGSLDIEKNPHFQGP
O75362	538	AEVKNDGKNQDTEDA	P19823	379	DAKRYIEKIQPSGGT	Q8IYD9	179	GPYTSMGKDNFVTPV
O75362	565	KRFFDGAKDVTGSPP	P19823	463	DVDYDFLKRLSNENH	Q8IYE1	392	DALMDQLKQLQEILG
O75362	862	KRPETKLKPLPVAPS	P19823	487	QDTSSQLKKFYNQVS	Q8IYF1	410	ATTALGDKQRKANES
O75362	887	GSIDYPAKNDSPWAP	P19823	488	DTSSQLKKFYNQVST	Q8IYH5	822	FVQHVGFKCDNCGIE
O75363	223	KRAEHQDKVDEVPGL	P19823	537	AGKFDPAKLDQIESV	Q8IYJ1	132	LTGVPGKKCGTILLT
O75363	241	SDDVPAGKDIVDGKE	P19823	573	QDFLSKDKHADPDFT	Q8IYL3	60	TRTSKKFKCDKGHLV
O75366	349	LFQKWSVKDQTMGLG	P19823	605	LAPTAAAKRRITRSI	Q8IYL3	63	SKKFKCDKGHLVKSE
O75366	357	DQTMGLGKTFSIGKI	P19823	93	ATTMIQSKVVNNSPQ	Q8IYQ7	713	EALLERTKQQEKMEY
O75366	363	GKTFSIGKIAKVFQD	P19827	114	NAFIGDIKDKVTAWK	Q8IYT1	341	SMAPNSTKVAVAGAA
O75368	37	NKIGFEEKDIAANEE	P19827	121	KDKVTAWKQYRKAAI	Q8IYT3	267	LLSAVEAKEALEREV
O75376	1255	ESVEGNIKQGMSMRE	P19827	125	TAWKQYRKAAISGEN	Q8IYT3	634	EVVTSEMKTLKKSLE
O75385	62	KSQTLLGKEIKILKE	P19827	180	MQYEIVIKVKPKQLV	Q8IYV9	62	ERVENAVKDFQELSL
O75417	1345	ENAKLGAKDTNLAAG	P19827	182	YEIVIKVKPKQLVHH	Q8IYW2	2197	PKFITAAKGKVQAVG
O75417	1356	LAAGIMQKSLVQQNS	P19827	214	AQASFLPKELAAQTI	Q8IYW2	2689	VSSRGQDKGGLPLAA
O75417	1369	NSMNSFQKECHIPFP	P19827	222	ELAAQTIKKSFSGKK	Q8IYW5	389	SKEISKRKNQESSFE
O75420	846	GLWEDTPKSGGSLVR	P19827	223	LAAQTIKKSFSGKKG	Q8IYW5	399	ESSFEAVKDPCFSAK
O75426	143	YRRFLPTKDHVFILD	P19827	229	KKSFSGKKGHVLFRP	Q8IYX8	137	EKQLEYTKRMVLNVE
O75426	159	VGTLFFLKNALVSTL	P19827	309	SMRGQKVKQTKEALL	Q8IZ21	97	QGGEDPGKPSDAMLK
O75437	388	LECGKAFKQLSTLTT	P19827	317	QTKEALLKILGDMQP	Q8IZ69	264	TVGCRLGKYKGGTCA
O75449	267	KAVATECKTTFFNVS	P19827	341	GTRVQSWKGSLVQAS	Q8IZF6	1267	QMTISLGKTPRTMEV
O75449	281	SSSTLTSKYRGESEK	P19827	418	TDRSQILKNVRNAIR	Q8IZF6	1621	IYAGATSKNKMVSSA
O75469	252	DMSTYMFKGIISFAK	P19827	519	AGRIADNKQSSFKAD	Q8IZF6	29	LSDTLSLKGKKLDFF
O75477	257	FLAREKAKADAEYYA	P19827	577	TIQELLAKRMKVDRE	Q8IZH2	159	NMKISTDKSWQGVTI
O75477	267	AEYYAAHKYATSNKH	P19827	580	ELLAKRMKVDREERA	Q8IZH2	586	ETCNHSLKKEERKRN
O75553	95	TISFGGIKIFDEKTG	P19827	621	MADQDGLKPTIDKPS	Q8IZH2	587	TCNHSLKKEERKRNQ
O75558	108	HCKLRAMKELSEAAE	P19827	93	AFDLEIPKTAFISDF	Q8IZH2	772	KEQSNWAKEVQGISE
O75570	373	RQQQSARKLQVGTRA	P20020	359	ANLPKKEKSVLQGKL	Q8IZI9	70	SLLLKDCKCRSRLFP
O75575	32	EQRKESGKNKHSSGQ	P20020	452	YSVKKMMKDNNLVRH	Q8IZJ3	1787	GPLQQDVKLNGAGLE
O75592	3431	ITDTDLAKRTVFQRS	P20020	590	KSMSTVLKNSDGSYR	Q8IZQ1	471	ISVSILLKSSSSYHC
O75592	641	SSLVTDLKGHFVTQV	P20020	807	NDGPALKKADVGFAM	Q8IZQ1	488	IAMKTLLKFTRHDYI
O75602	399	SSEDLQVKSKKAIKN	P20020	840	DNFTSIVKAVMWGRN	Q8IZY2	127	RTLAGLGKLIATLRA
O75602	401	EDLQVKSKKAIKNIL	P20020	87	RREAVFGKNFIPPKK	Q8J025	454	SSPDRPEKRATSYQM
O75626	551	DEAMNLIKNKRNMTG	P20073	268	YDAWSLRKAMQGAGT	Q8N0V3	73	HSTYKPSKLEFLMRS
O75626	553	AMNLIKNKRNMTGYK	P20592	425	KMFFLIEKIKMFNQD	Q8N0Z2	328	ARHRRDGKIQVTFGD
O75636	276	VSEAAAHKYGIDWAS	P20592	557	QSTIEDIKVKHTAKA	Q8N111	33	VPPAADGKAPLTKPS
O75689	123	QEFIYPEKQEPYSAG	P20594	791	GFIRRFNKEGGTSIL	Q8N111	38	DGKAPLTKPSKKEAP
O75689	138	YREGFLWKRGRDNGQ	P20618	204	DRAMRLVKDVFISAA	Q8N118	161	EVMAHSVKMMLDKWE
O75691	2099	HLSLKTSKIKSSGEC	P20742	1165	YAFSLLGKQNQNREI	Q8N119	528	FKGNAYWKVVNDKDK
O75691	2101	SLKTSKIKSSGECVL	P20742	1403	IPLKPTVKMLERSSS	Q8N129	114	KGSLRYAKGQSQTMA
O75695	109	FRNCRDCKCTLACQQ	P20742	231	VLPKFEVKVQVPKII	Q8N139	1338	RMISGITKPTAGEVE
O75695	46	DYMFSGLKDETVGRL	P20742	315	TNTGFEMKLRVEARI	Q8N140	204	ENGNMPTKLQKLDLS
O75815	682	QTAILYEKQLKPFSK	P20742	371	QVLLVDGKGVPIPNK	Q8N140	207	NMPTKLQKLDLSSYP
O75828	232	ACCPGPVKTDMDGKD	P20742	604	DQSVLLMKPEAELSV	Q8N141	173	VDKPYECKECGKAFR
O75828	238	VKTDMDGKDSIRTVE	P20742	947	KLPSNVVKESARASF	Q8N157	121	DASVEEDKQGKPNKK
O75882	1015	PSNTGKGKCIEGSYK	P20807	711	MDTDGSGKLNLQEFH	Q8N158	27	PGPGSEAKVTRSCAE
O75882	1130	GKCFCTTKGVKGDEC	P20827	103	SAKHGPEKLSEKFQR	Q8N1G0	1207	LTCKVCGKSCDSPLN
O75882	1133	FCTTKGVKGDECQLC	P20839	436	RYFSEGDKVKIAQGV	Q8N1I0	72	KNACVKNKGQFEMVI
O75882	1232	VVSKTNIKEYKDSFS	P20839	438	FSEGDKVKIAQGVSG	Q8N283	837	ASLRQHEKTRGSLVA
O75882	1235	KTNIKEYKDSFSNEK	P20849	834	ALGLRGPKGDLGEKG	Q8N2C7	1170	SPNQDGGKSKNVVNL
O75882	1242	KDSFSNEKFDFRNHP	P20851	237	GMTMEELKYSLELKK	Q8N2C7	1268	VGNKRNQKLQWNAAK
O75882	401	GHSLALYKDKIYMYG	P20851	243	LKYSLELKKAELKAK	Q8N2C7	1393	DRHRYERKISFAGVL
O75882	403	SLALYKDKIYMYGGK	P20851	244	KYSLELKKAELKAKL	Q8N2C7	200	APLVHRIKESDLTFR
O75882	439	VLLTPKAKEQYAVVG	P20929	1089	AASDVQYKKDYEKAK	Q8N2F6	292	QNIKNCLKIEGHLAV
O75882	749	FRYENCPKDNPMYYC	P20929	153	TICHVDEKAKDIEHA	Q8N2F6	320	HGEECAQKIRALVDH
O75882	806	CLKITTAKENYDNAK	P20929	161	AKDIEHAKKVSQQVS	Q8N2I9	191	VVEALHQKNIVHRDL
O75882	831	ASLTTQKKVEFVLKQ	P20929	5119	VRSRHLRKLWSNYLY	Q8N2K1	25	KQDYLRIKKDPVPYI
O75882	837	KKVEFVLKQLRIMQS	P20929	5132	LYTDKARKMRDKYKV	Q8N2N9	536	SHKQPSLKATSDKED
O75884	159	RLETKLHKFTDCGHF	P20929	5549	NTNLDYKKQYEANKA	Q8N2N9	541	SLKATSDKEDSVPNM
O75897	113	MPSPRILKTHLPFHL	P20929	5593	REFLKGCKLSVTDDK	Q8N302	357	ISNSTSFKDEKIMET
O75897	92	RFPFLEMKIPSLGSG	P20929	5600	KLSVTDDKNTVLALR	Q8N323	345	IKINGCLKGKLIYLL
O75899	188	AVNPAILKLLKHYQW	P20929	5616	TLIESDLKYKEKHVK	Q8N335	162	ANEVAAEKFCETTIG
O75899	70	PLTKEVAKGSIGRGV	P20929	590	LAAKANTKNTSDVMY	Q8N335	180	MENGLLFKELLQTPN
O75909	118	KKCKDIIKTARSLLN	P20929	598	NTSDVMYKKDYEKNK	Q8N394	693	LLALTGRKSEAEKLF
O75909	137	GQFGDDPKEEVMVLE	P20929	837	LAAKANTKNTSDVMY	Q8N3A8	299	YPPPGCGKSKSKLKS
O75923	1609	YIKISIGKKSVSDQD	P20929	845	NTSDVMYKKDYEKSK	Q8N3A8	301	PPGCGKSKSKLKSEQ
O75923	1610	IKISIGKKSVSDQDN	P20929	957	ADYNSWMKGCGWVPF	Q8N3C0	213	EACTPELKPVEKTNG
O75923	1841	KMSDIYVKGWMIGFE	P20930	3967	SEGTERQKGQSGLVW	Q8N3C0	423	SAFIAGAKMILPEGI
O75923	1851	MIGFEEHKQKTDVHY	P21108	18	SHQDLSQKIADRLGL	Q8N3C0	48	LDLGLTWKKIIKFLN
O75943	297	VAPTIMMKFLNRIVT	P21333	1294	QTGGPHVKARVANPS	Q8N3C0	49	DLGLTWKKIIKFLNE
O75943	590	DIGRLPLKRHFGRLK	P21333	1372	IQSGTTNKPNKFTVE	Q8N3C7	284	MLTSLGLKLGDRVVI
O75955	166	DYLHSLGKARTAQVQ	P21333	1375	GTTNKPNKFTVETRG	Q8N3E9	201	ADSNQDSKMSFKEIK
O75955	211	LSEIEMAKAQRDYEL	P21333	1491	QVKVQGPKGLVEPVD	Q8N3E9	208	KMSFKEIKSLLRMVN
O75955	220	QRDYELKKAAYDIEV	P21333	1547	LPTHDASKVKASGPG	Q8N3G9	428	GLLPPLYKSVKTYTV
O75955	244	AYQLQVAKTKQQIEE	P21333	2024	GEHLVHVKKNGQHVA	Q8N3K9	1555	QNVSPASKHIIPKGK
O75955	302	ERLAEAEKSQLIMQA	P21333	2417	HIPGSPFKIRVGEPG	Q8N3K9	2661	EGNLVLEKSSRDMPD
O75955	340	AEAEQMAKKAEAFQL	P21333	2569	AKGLGLSKAYVGQKS	Q8N3K9	2673	MPDHSEEKEQFRESE
O75955	341	EAEQMAKKAEAFQLY	P21333	508	ADFKVYTKGAGSGEL	Q8N3S3	101	VRGSAFAKAKPESPW
O75955	360	QLDMLLEKLPQVAEE	P21333	771	GAGSHPNKVKVYGPG	Q8N402	62	HHGFWRKKIQPQEAS
O75955	377	GPLTSANKITLVSSG	P21333	781	VYGPGVAKTGLKAHE	Q8N412	360	PGSYDVHKSYEMSQV
O75955	51	NTLTLNVKSEKVYTR	P21333	891	RTGVELGKPTHFTVN	Q8N414	327	ARGQYQIKMKGNMSL
O75962	1018	NASVAFYKTSEQVCS	P21333	994	KDQEFTVKSKGAGGQ	Q8N428	512	MCNPREGKQKWRRKG
O75962	1808	KKSREVRKSADAGSQ	P21359	1040	QEMKFRNKMVEYLTD	Q8N441	30	AAARGPPKMADKVVP
O75964	55	RAIQSLKKIVNSAQT	P21359	1062	QAADDDVKCLTRDLD	Q8N4C6	1169	SVQRQEVKIEESEAS
O75970	1388	DPNGAAGKDGRLQIA	P21397	357	MGFILARKADRLAKL	Q8N4L1	262	AREGMHLKDVDFRES
O75976	1201	PSLWADNKRSLLSML	P21781	111	AVGIVAIKGVESEFY	Q8N4P6	199	LCSSTLRKVSLEGNP
O76021	116	KTEQFYRKLLNKHGI	P21781	86	IDKRGKVKGTQEMKN	Q8N4S0	115	TYEEETNKIKHRNID
O76021	120	FYRKLLNKHGIKTVS	P21781	92	VKGTQEMKNNYNIME	Q8N4W9	374	GVKPYKCKICEKAFA
O76021	408	TPRGKKRKALPASET	P21802	401	TVILCRMKNTTKKPD	Q8N4W9	378	YKCKICEKAFACHSY
O76021	426	AESETPGKSPEKKPK	P21802	641	VTENNVMKIADFGLA	Q8N543	4	****MNGKRPAEPGP
O76031	164	VKLAFQQKPPPPPKK	P21817	3822	MLDYLKDKKEVGFFQ	Q8N565	109	REVRNRWKCILEDLG
O76031	171	KPPPPPKKIYNYLDK	P21817	3823	LDYLKDKKEVGFFQS	Q8N584	82	MMTFEEEKMQLACDD
O76031	178	KIYNYLDKYVVGQSF	P21941	350	RNMSYMEKGTMTGAA	Q8N5C6	955	IRNVTEAKLSKTKKR
O76038	47	FFLHMLMKLGTDDTV	P22003	441	DSSNVILKKYRNMVV	Q8N5C6	958	VTEAKLSKTKKRRSL
O76038	61	VMKANLHKVKQQFMT	P22003	442	SSNVILKKYRNMVVR	Q8N5G2	545	VQELRKYKENEKDTE
O76039	275	SVLLDLMKNLLKLDP	P22059	649	LLGTWDEKMECFKVQ	Q8N5G2	549	RKYKENEKDTEVLMS
O76041	708	PPELKRAKENQKNIS	P22061	105	RMVGCTGKVIGIDHI	Q8N5I4	268	LLGWLLFKTPDEGAW
O76064	155	KELRTKRKFSLDELA	P22105	3512	LEPGKKYKFLLYGLL	Q8N5Q1	441	PGLAPPQKAPAASAP
O76064	178	NLKSKINKVSCESGQ	P22105	3629	LYGLHEGKRLGPLSA	Q8N5Q1	451	AASAPPRKAPAVPAP
O94769	208	GMDRIVRKEALQSEE	P22105	3739	YGLRGPHKADSIQGT	Q8N5S1	117	TAPLDRAKVYMQVYS
O94776	592	SSSQPAAKRQKLNPA	P22105	3785	PSRADSFKVSYQLAD	Q8N5Z0	49	NPNMFPFKTAVITVE
O94782	656	GGNTQPSKVLNKKNV	P22234	304	LRVTSAHKGPDETLR	Q8N608	276	FTGALYPKGKQYPYP
O94782	673	IGLLGGQKSKADYEL	P22303	54	RLRGIRLKTPGGPVS	Q8N608	278	GALYPKGKQYPYPKA
O94788	456	VFTNDINKALTVSSA	P22314	385	LDEDLIRKLAYVAAG	Q8N655	1090	AEVQSKRKRTEGSSP
O94808	62	QLVKKRGKVKALDEE	P22352	120	SEILPTLKYVRPGGG	Q8N655	140	KMISTSIKTARKSKR
O94808	64	VKKRGKVKALDEELY	P22352	137	PNFQLFEKGDVNGEK	Q8N6C5	273	EKSFYHKKTIKNEAN
O94812	701	APFLPAVKLWFQVLR	P22352	147	VNGEKEQKFYTFLKN	Q8N6C5	276	FYHKKTIKNEANFFF
O94822	872	DFLICKLKNTWLSGV	P22352	208	RTTVSNVKMDILSYM	Q8N6C5	287	NFFFQSLKIQDTGHY
O94822	904	HLSALWLKNQVQASS	P22455	169	VPAGNTVKFRCPAAG	Q8N6L0	251	AQARQAEKEQQHLVA
O94826	258	MPSPQFIKSYFSSFT	P22692	236	VDRKTGVKLPGGLEP	Q8N6L0	269	TLQEENGKLLAERDG
O94832	582	LVDNLASKEPYYVRC	P22695	2	******MKLLTRAGS	Q8N6P7	462	MEESQEAKSLHQPLG
O94832	591	PYYVRCIKPNDKKSP	P22792	441	VVPALNEKQLVCPVT	Q8N6S4	173	HNAPVKVKNAQGWSP
O94832	758	KTMRDYGKHVKWPSP	P22888	225	FRGATGPKTLDISST	Q8N7B9	24	KVPISHNKRDRDLPG
O94868	45	DMRTFSQKKAAIERE	P22894	62	GTNVIVEKLKEMQRF	Q8N7P1	102	DEDGLSEKNCQNKCR
O94874	625	ETKVALTKLHNSLNE	P22897	637	EGVTHPPKPTTTPEP	Q8N7P1	500	DWYSPYAKTLQPTKQ
O94874	633	LHNSLNEKSIEDFIS	P23025	179	HSQWGDMKLYLKLQI	Q8N7Z5	211	TMTSEETKDEESSLE
O94874	654	EACDIMVKRGDKKRE	P23025	183	GDMKLYLKLQIVKRS	Q8N884	47	APEAALPKAGKFGPA
O94905	257	FLAREKAKADAECYT	P23141	402	LIPEATEKYLGGTDD	Q8N8J0	225	YPKGDQRKKACLSAL
O94910	243	YDLRTRIKSGETVIN	P23193	265	TDLFTCGKCKKKNCT	Q8N8N7	340	MTGGNIGKQIVCISE
O94913	315	GKDQSHRKEFLMNTL	P23193	267	LFTCGKCKKKNCTYT	Q8N8S7	52	TFRVVGRKIQDHQVV
O94913	328	TLNQSDTKTSKTIPS	P23276	235	PEFDVPLKQDQEQKI	Q8N8S7	66	VINCAIPKGLKYNQA
O94913	331	QSDTKTSKTIPSEKL	P23276	297	EQRRAQGKLFQMVTI	Q8N8X9	299	CEKYPHFKDWQVFSK
O94915	2232	EIIKIIGKYVQSPYW	P23276	441	STRSAAMKLFTAIRD	Q8N8Z6	167	ERASHYLKTEYSKFC
O94916	249	TDNKGNSKAGNGTLE	P23276	487	GASEWALKPELARQE	Q8N954	64	ERRDIGLKNALGCEN
O94916	259	NGTLENQKGTGVKKS	P23276	684	YAQVMCRKPSPQDSH	Q8N954	72	NALGCENKGFALLQK
O94916	264	NQKGTGVKKSPMLCG	P23284	131	PDENFKLKHYGPGWV	Q8N960	22	LEGRHFPKRPKHMLV
O94919	252	IIEDVMVKDLQKLLP	P23284	165	KTAWLDGKHVVFGKV	Q8N999	33	KREHQPFKVLATETV
O94919	281	QDTEKMKKILEVVNQ	P23284	171	GKHVVFGKVLEGMEV	Q8N999	43	ATETVSHKALDADIY
O94919	300	ERMVQSQKSSSPLSS	P23284	215	EKPFAIAKE******	Q8N9B5	931	NILAQIRKGVKLKKV
O94972	175	VEAVRNAKDERVREI	P23284	67	VIFGLFGKTVPKTVD	Q8N9B5	934	AQIRKGVKLKKVQKD
O94985	410	TILCSSDKTDMNRHH	P23284	98	SKFHRVIKDFMIQGG	Q8N9B8	136	PYDFQDEKAMAELKA
O95049	181	LALVSGFKRLPRQDV	P23468	1076	QKLIVNLKPEKSYSF	Q8N9F7	161	VNNNVLIKKVSELVK
O95155	1001	YHISTIFKSLWQNIA	P23468	204	SEESDQGKYECVATN	Q8N9F7	237	PMPSIILKLKEPHTM
O95163	1145	LLVVRELKEQAQQAG	P23469	473	NRVILSMKRGQEYTD	Q8N9F8	264	SSLTYHQKIHTGEKP
O95171	493	QDLDKLIKVNPEIFT	P23470	222	DPIIHGLKGVVHHEK	Q8N9L7	8	MTMTMSYKAIEKIPR
O95197	116	GSQPILAKEGKDHLD	P23470	229	KGVVHHEKETFLDPF	Q8N9M1	166	RPDTSTSKISVTVSN
O95197	998	PIVYEKYKTQIDHYV	P23526	186	NVNDSVTKSKFDNLY	Q8N9M1	174	ISVTVSNKMAAKSAK
O95199	403	LKFLVDGKYIYAHKV	P23528	121	KMIYASSKDAIKKKL	Q8N9V2	283	GMKEMLRKFSTEITL
O95199	413	YAHKVLLKIRCEHFR	P23634	189	CRIEQEQKFSIIRNG	Q8N9V6	152	HFAAQWGKLACLQVL
O95202	133	SLKDKNKKLEEGGPV	P23634	564	VPEEKLYKVYTFNSV	Q8N9V6	164	QVLVEEYKFPVDLLT
O95238	173	YRLPPMGKAFQELAG	P23634	742	KGEVEQEKLDKIWPK	Q8N9V7	176	RIRNKKLKSLENPPL
O95239	761	MVSTEEAKRHLNDLL	P23634	75	GNPADLEKRRQVFGH	Q8N9V7	195	NEATQNIKVEFQDEL
O95239	78	PLIKGVFKGYNATVL	P23634	766	TDKHTLVKGIIDSTV	Q8N9V7	595	PIIKDDKKIKSEELS
O95239	94	YGQTGSGKTYSMGGA	P23634	985	SRKIHGEKNVFSGIY	Q8NA19	197	KEFQVGMKLEAVDRK
O95267	461	WASGVSPKPDPKTIS	P23942	47	FLKIELRKRSDVMNN	Q8NA29	449	SFYVFFTKFASGVSL
O95267	469	PDPKTISKHVQRMVD	P24071	94	IDHMDANKAGRYQCQ	Q8NA66	133	RPKRATEKFEEFLAI
O95299	221	VQRRIQKKGDPHEMK	P24386	543	IENEQVEKPRILWAL	Q8NA70	100	RKKKLLKKAALFSEL
O95299	242	QDIENAYKKTFLPEM	P24462	91	ITDPDMIKTVLVKEC	Q8NA72	334	SGALENAKAEIQRMQ
O95299	243	DIENAYKKTFLPEMS	P24593	204	EASLQELKASPRMVP	Q8NA72	344	IQRMQHEKEHFEDSM
O95299	280	IEYLKFDKGPWLKQD	P24752	78	AIQGAIEKAGIPKEE	Q8NA82	328	GTSTPQAKNKNFEEN
O95302	441	REMCVGEKRTVIIPP	P25021	18	CLDSTACKITITVVL	Q8NAT2	260	MSMEKTSKLNVVETS
O95340	307	LPVSAEDKTRLEGCS	P25103	248	SAKRKVVKMMIVVVC	Q8NB49	685	GDKMETAKSTCYACR
O95340	357	CTKHPHIKMVMESGD	P25311	142	WKYYYDGKDYIEFNK	Q8NB50	167	KIMHTGEKRYECDDC
O95347	336	SKRKELEKNMVEDSK	P25311	179	PVYVQRAKAYLEEEC	Q8NB50	524	SSALEQHKRIHTREK
O95359	2386	DPFKTSSKTPSSPSK	P25311	224	PGEKKKLKCLAYDFY	Q8NB78	52	GSEKKYRKCEKAGCT
O95359	2417	VDGDGLNKPAKKKKT	P25311	84	VEGMEDWKQDSQLQK	Q8NB78	646	FNPPLSEKKMKAINS
O95359	2420	DGLNKPAKKKKTPLK	P25311	91	KQDSQLQKAREDIFM	Q8NB78	705	YDMDPQKKHSVLMSV
O95359	384	QTGMRGTKPNQVVCV	P25325	224	LSQEGLEKSPEEIRH	Q8NB78	727	SVRTLDDKQVLQQCM
O95390	86	IKSQILSKLRLKEAP	P25445	193	LIVWVKRKEVQKTCR	Q8NBM4	68	RIICLDLKDTFCSSL
O95393	267	QSSDKERKEELNEMI	P25705	123	VVVFGNDKLIKEGDI	Q8NBN3	501	GMKMRSTKQEPNGNS
O95425	74	LEKQTRSKYCTETSG	P25774	239	YGREDVLKEAVANKG	Q8NBN3	512	NGNSKVNKAQEDDLK
O95445	99	DGLCVPRKWIYHLTE	P25786	189	CNLNELVKHGLRALR	Q8NBN3	519	KAQEDDLKWVEENVP
O95450	683	DGTRCSYKDAFSLCV	P25786	41	ATVGLKSKTHAVLVA	Q8NBP7	222	RFHRQASKCDSHGTH
O95455	18	GLPGGFAKRVLVTGG	P25787	53	LATEKKQKSILYDER	Q8NBP7	273	IGLEFIRKSQLVQPV
O95466	955	ANSPTMDKLLADSKT	P25787	92	VLVHRARKLAQQYYL	Q8NBS9	150	KPGQEAVKYQGPRDF
O95466	961	DKLLADSKTAQEAFE	P25789	205	NKTMDVSKLSAEKVE	Q8NBS9	244	SETVKIGKVDCTQHY
O95466	979	EYFGENPKTTSPGLF	P25789	210	VSKLSAEKVEIATLT	Q8NBT2	50	ETQDGAEKQLREILT
O95478	166	GFTRKPPKYERFIRP	P25874	257	SVPNCAMKVFTNEGP	Q8NC26	169	PVLNDSQKTHENNED
O95478	76	EKRNTKQKNDEKTPQ	P25940	1399	LKGDTGPKGEKGHIG	Q8NC51	68	TNSNAAGKQLRKESQ
O95478	80	TKQKNDEKTPQGAVP	P26006	786	VMGESGMKTVEDVGS	Q8NCA5	173	QFFSGIEKKKLKETL
O95490	1439	GYIIPINKEGCIPEG	P26038	360	QIEEQTKKAQQELEE	Q8NCL4	419	KSPHTFPKGTSVIAR
O95497	272	SNIHYPSKKMTGSGI	P26038	388	RAQSEAEKLAKERQE	Q8NCM8	3077	NKGSFDPKNAKRAST
O95502	488	EAFGGATKAAFDVCK	P26038	412	QASRDQKKTQEQLAL	Q8NCM8	3094	APLAAWVKANIQYSH
O95502	499	DVCKGRAKA******	P26038	538	NARDESKKTANDMIH	Q8NCV1	549	LKTYEAAKAGPYQEA
O95573	397	IYKNVMNKVSEMSSF	P26232	268	TSPTDEAKGHTGIGE	Q8NCY6	44	NTTINVMKRMAWEEI
O95631	358	RFNMELYKLSGRKSG	P26374	236	FNIDLVSKLLYSQGL	Q8ND56	40	NSTVALAKVRSFGTE
O95661	201	MLLNYKKKPTTGLQE	P26447	28	GKEGDKFKLNKSELK	Q8ND82	463	PYMNHYMKHQKKGVH
O95678	175	RFLEQQNKVLETKWA	P26447	35	KLNKSELKELLTREL	Q8NDA2	3214	NTQAEARKDFVVAVL
O95696	368	YMKMEPVKELTGGGT	P26572	408	LGVMDDLKSGVPRAG	Q8NDH2	1123	LGTPANSKGFSVSER
O95714	187	KSSRPAGKGVEGLAR	P26599	398	MSHLNGHKLHGKPIR	Q8NDI1	139	TDVKLKFKPLSKKVV
O95714	3067	TALTVDGKVFSWGEG	P26639	231	ETLLAMFKYNKFKCR	Q8NDI1	839	AALKAGNKHNTNTAT
O95714	4186	RGGSDGCKVPMKIDS	P26639	234	LAMFKYNKFKCRILN	Q8NDI1	953	LVDLKLKKLLEVQPQ
O95714	4201	LTGLGVVKVECGSQF	P26927	143	HKFPNDHKYTPTLRN	Q8NDT2	394	LDMAHRAKVAMSGRV
O95714	649	SDGCKTPKLIEKLQD	P27105	158	LRNVLGTKNLSQILS	Q8NDV7	1826	ALVRYSSKEEVVKAQ
O95749	174	SDYKEDLKPLLNTLG	P27105	188	ATDAWGIKVERVEIK	Q8NDY3	5	***MEKFKAAMLLGS
O95754	169	RLESGRGKCPFEPAQ	P27105	195	KVERVEIKDVKLPVQ	Q8NE09	69	QFLEKQLKKILQNQQ
O95754	193	VLYAATVKNYLGTEP	P27105	198	RVEIKDVKLPVQLQR	Q8NE09	745	GLQQEKKKEIYMKIQ
O95754	281	AGDLGGRKTLQQRWT	P27105	220	ASREARAKVIAAEGE	Q8NE09	750	KKKEIYMKIQPPFED
O95754	292	QRWTTFLKADLLCPG	P27105	235	MNASRALKEASMVIT	Q8NE09	779	EPWTKMVKSDQIAYK
O95757	194	DLPPLDEKPRNVVFI	P27105	263	LTTIAAEKNSTIVFP	Q8NE22	161	YPGTVYQKYEPIFFQ
O95785	341	IEEIQKLKQVPGDEG	P27105	77	RILQGGAKGPGLFFI	Q8NE79	331	PHQRASAKMKPIEEG
O95789	611	KVNISKAKTAVTELP	P27105	93	PCTDSFIKVDMRTIS	Q8NEB9	613	PETATLFKSALMPAQ
O95810	102	NDLTKLSKYQASTSN	P27144	201	FSGTETNKIWPYVYT	Q8NEC7	214	GVGPPLTKGKAKSKV
O95835	43	ESLRNLSKPSDAAKA	P27169	138	VVNHPDAKSTVELFK	Q8NEC7	216	GPPLTKGKAKSKVHT
O95847	160	VQMQMEGKRKLEGKP	P27169	145	KSTVELFKFQEEEKS	Q8NEC7	218	PLTKGKAKSKVHTQE
O95932	456	KERQVYSKAVNRLFG	P27169	157	EKSLLHLKTIRHKLL	Q8NEL9	744	ESITNIGKASILGAA
O96001	117	EQKKPRRKDTPALHM	P27169	244	IAELLAHKIHVYEKH	Q8NEM0	41	DMGAKVSKTFNKQVT
O96005	207	YKRRRFQKTKNLLTG	P27169	349	LIGTVFHKALYCEL*	Q8NEN9	1042	KLEFMLDKLQNEIDQ
O96005	209	RRRFQKTKNLLTGET	P27169	75	GLKYPGIKSFNPNSP	Q8NEN9	1062	NSLVREEKETTDTRK
O96011	189	GLPQLALKLRLQVLL	P27169	84	FNPNSPGKILLMDLN	Q8NEN9	930	EASKSVNKTTGLTRH
O96028	404	MKRRRRAKLCSSAET	P27338	81	ELGLETYKVNEVERL	Q8NEV4	1375	KDKMSSFKHQRIVTT
O96028	420	ESHPDIGKSTPQKTA	P27348	49	NLLSVAYKNVVGGRR	Q8NEV4	90	GIYFKKDKVNGDKLW
O96028	425	IGKSTPQKTAEADPR	P27449	36	GAAYGTAKSGTGIAA	Q8NEV4	95	KDKVNGDKLWLVLEL
P00325	11	AGKVIKCKAAVLWEV	P27487	513	NVQMPSKKLDFIILN	Q8NEY1	48	GMLPKRAKAPGGGGG
P00325	232	INKDKFAKAKELGAT	P27487	589	GSGYQGDKIMHAINR	Q8NEY1	531	GHPGSLKKGKTPPVA
P00325	249	INPQDYKKPIQEVLK	P27658	101	QPAPRMGKEAVPKKG	Q8NEY1	533	PGSLKKGKTPPVAVT
P00325	326	VYGGFKSKEGIPKLV	P27797	143	ICGPGTKKVHVIFNY	Q8NEY1	552	HTAQSALKVAGKPEG
P00325	367	FDLLHSGKSIRTVLT	P27797	151	VHVIFNYKGKNVLIN	Q8NEY1	58	GGGGGMAKASAAELK
P00325	40	KAYEVRIKMVAVGIC	P27797	153	VIFNYKGKNVLINKD	Q8NEZ3	190	NMQFFLMKMDDRTSA
P00338	149	ILTYVAWKISGFPKN	P27797	159	GKNVLINKDIRCKDD	Q8NF50	294	SIALYDVKERKKISE
P00338	59	DVIEDKLKGEMMDLQ	P27797	224	EDWDERAKIDDPTDS	Q8NF50	297	LYDVKERKKISENFH
P00352	252	TGSTEVGKLIKEAAG	P27797	48	KHKSDFGKFVLSSGK	Q8NF91	1917	NDALQNAKALESAAV
P00352	36	WHDSVSGKKFPVFNP	P27797	55	KFVLSSGKFYGDEEK	Q8NF91	1932	SLDGILSKAQYHLKI
P00367	200	YTDNELEKITRRFTM	P27797	64	YGDEEKDKGLQTSQD	Q8NF91	4737	VDELNQKKEGFRSTG
P00367	211	RFTMELAKKGFIGPG	P27824	118	ESKLPGDKGLVLMSR	Q8NF91	5336	ETQINSVKCWVQETK
P00390	340	IGRVPNTKDLSLNKL	P27824	170	AYVKLLSKTPELNLD	Q8NF91	5382	EKMAEEQKEKYLGLY
P00441	10	TKAVCVLKGDGPVQG	P27824	227	KRPDADLKTYFTDKK	Q8NF91	7925	NSEEIQRKLNEQQEL
P00441	123	RTLVVHEKADDLGKG	P27824	382	DNPNYKGKWKPPMID	Q8NFA0	126	MLHVVDGKVPDTLRK
P00441	129	EKADDLGKGGNEEST	P27918	333	PCIRRNMKSISCQEI	Q8NFA0	721	SFIANSSKIDRHKVP
P00441	31	KESNGPVKVWGSIKG	P27918	66	NTAFAYQKRSGGLCQ	Q8NFD5	1696	EVGDPSQKALDHNAA
P00441	37	VKVWGSIKGLTEGLH	P28066	52	GVCLAVEKRITSPLM	Q8NFH5	147	ASIGQPRKTTLSPAQ
P00441	4	****MATKAVCVLKG	P28289	191	EETLERIKNNDPKLE	Q8NFP9	911	PKNSEEQKITEMVYN
P00450	104	IKAETGDKVYVHLKN	P28289	214	NIPIPTLKAYAEALK	Q8NFU5	167	KIQQQVSKYPLMEEI
P00450	110	DKVYVHLKNLASRPY	P28289	221	KAYAEALKENSYVKK	Q8NFU7	912	SENSSPSKSEKDEES
P00450	187	HSHIDAPKDIASGLI	P28289	228	KENSYVKKFSIVGTR	Q8NFU7	915	SSPSKSEKDEESEQR
P00450	202	GPLIICKKDSLDKEK	P28289	249	YALAEMLKENKVLKT	Q8NFW1	1094	GERGPPGKPGLSSLL
P00450	211	SLDKEKEKHIDREFV	P28289	255	LKENKVLKTLNVESN	Q8NFW1	1379	GEKGVPGKEGVPGKP
P00450	248	SEPEKVDKDNEDFQE	P28289	286	NTSLVEMKIDNQSQP	Q8NFW1	1392	KPGEPGFKGERGDPG
P00450	307	HGQALTNKNYRIDTI	P28289	297	QSQPLGNKVEMEIVS	Q8NG08	132	HICALFLKECEVSSD
P00450	359	FQVQECNKSSSKDNI	P28289	308	EIVSMLEKNATLLKF	Q8NG08	75	ENTQETCKVFGRFPI
P00450	42	YASDHGEKKLISVDT	P28289	314	EKNATLLKFGYHFTQ	Q8NG08	90	TGAWWRVKVQVKPVV
P00450	43	ASDHGEKKLISVDTE	P28330	66	IFRKSVRKFFQEEVI	Q8NG76	291	NPLIYSVKNSEVKGA
P00450	437	DASFTNRKERGPEEE	P28331	87	VEIEKAPKVVAACAM	Q8NG76	296	SVKNSEVKGALKRWL
P00450	468	IRVTFHNKGAYPLSI	P28482	285	LFPNADSKALDLLDK	Q8NGG2	341	KDVKDSMKKMFGKNQ
P00450	484	PIGVRFNKNNEGTYY	P28482	99	APTIEQMKDVYIVQD	Q8NGG2	342	DVKDSMKKMFGKNQV
P00450	523	TYEWTVPKEVGPTNA	P28566	258	DPTTEFEKFHASIRI	Q8NGH3	104	VLVHFLVKRKTISFY
P00450	547	YSAVDPTKDIFTGLI	P28845	247	ECALEIIKGGALRQE	Q8NGI6	90	VDLLSERKTISFNHC
P00450	572	LHANGRQKDVDKEFY	P29083	296	AYGSEDMKEGGIDMD	Q8NGR5	271	LSMYSVMKGRVATVM
P00450	576	GRQKDVDKEFYLFPT	P29122	573	TKSQLLAKRLLDLSN	Q8NGR9	315	SLRNRDMKEALGKLF
P00450	609	TAPDQVDKEDEDFQE	P29144	1204	RGLKFATKLVEEKPT	Q8NGR9	326	GKLFVSGKTFFL***
P00450	619	EDFQESNKMHSMNGF	P29144	708	YRSHEFYKFCSLPEK	Q8NGZ0	302	KDVLAVMKNMLKSNF
P00450	778	GEFYIGSKYKKVVYR	P29144	883	QYSLKLEKGDYTIRL	Q8NGZ0	306	AVMKNMLKSNFLHKK
P00450	799	FRVPVERKAEEEHLG	P29374	868	GQSSPEKKIRIENGM	Q8NHM5	749	NLPGSLLKEQKMNRD
P00450	819	LHADVGDKVKIIFKN	P29400	1008	LPGPPGPKGNPGLPG	Q8NHM5	758	QKMNRDNKEGQEPAK
P00450	825	DKVKIIFKNMATRPY	P29400	1496	LLYVQGNKRAHGQDL	Q8NHS9	251	SAVIESMKYWREHAQ
P00450	860	ETLTYVWKIPERSGA	P29400	748	PPGFPGPKGEPGFAL	Q8NI27	960	LQRLKLEKDNWLLAK
P00450	906	VCRRPYLKVFNPRRK	P29400	966	LLGSKGEKGEPGLPG	Q8TAL5	363	KQQQQMEKGTTSKQD
P00450	944	TYSDHPEKVNKDDEE	P29401	232	CKAFGQAKHQPTAII	Q8TB36	207	DNVKYLKKILDELEK
P00450	947	DHPEKVNKDDEEFIE	P29475	861	SSYSDSQKSSGDGPD	Q8TB36	214	KILDELEKVLDQVET
P00450	957	EEFIESNKMHAINGR	P29622	150	LFLSHNLKFLAKFLN	Q8TB45	307	PPVLCNPKSVLKRPV
P00451	1335	QRSKRALKQFRLPLE	P29622	231	ISSRTTPKDFYVDEN	Q8TBB5	16	KKGRGAEKTAAKMEK
P00488	463	VDATHIGKLIVTKQI	P29622	271	SVLRMDYKGDATVFF	Q8TBB5	186	GHRMVAWKRQLILFG
P00488	505	ALMYGAKKPLNTEGV	P29622	285	FILPNQGKMREIEEV	Q8TBB5	20	GAEKTAAKMEKKVSK
P00488	514	LNTEGVMKSRSNVDM	P29622	312	LRKRNFYKKLELHLP	Q8TBC4	434	PNLSKTLKELGLVDG
P00491	211	AECRVLQKLGADAVG	P29622	313	RKRNFYKKLELHLPK	Q8TBC4	458	TPQTVLFKLHFTS**
P00533	487	LFGTSGQKTKIISNR	P29622	344	GFTDLFSKWADLSGI	Q8TBF8	259	DQLSLIVKENSGASE
P00558	199	KELNYFAKALESPER	P29622	365	EASKSFHKATLDVDE	Q8TBG4	153	LIEISPYKFQKGKDV
P00558	323	CGPESSKKYAEAVTR	P29622	386	AATSFAIKFFSAQTN	Q8TBG4	156	ISPYKFQKGKDVKKE
P00558	353	EAFARGTKALMDEVV	P29803	275	ANYCRSGKGPILMEL	Q8TBG4	72	GVVKAALKQMELLNT
P00558	97	GKDVLFLKDCVGPEV	P29973	605	KGKQILMKDGLLDLN	Q8TBJ5	86	LGYEVPSKTLLSYSE
P00734	243	AWASAQAKALSKHQD	P29992	252	ENRMEESKALFRTII	Q8TBX8	27	PGFGFASKTKKKHFV
P00734	247	AQAKALSKHQDFNSA	P30040	182	EARQALLKQGQDNLS	Q8TBX8	29	FGFASKTKKKHFVQQ
P00734	345	LRPLFEKKSLEDKTE	P30101	104	VSGYPTLKIFRDGEE	Q8TBY8	977	TESTQREKVCGTLGW
P00734	350	EKKSLEDKTERELLE	P30101	130	GIVSHLKKQAGPASV	Q8TBZ0	684	LQEIKNAKSEASIYK
P00734	384	WQVMLFRKSPQELLC	P30101	152	FKKFISDKDASIVGF	Q8TBZ0	699	NSLSEIGKECEMLSK
P00734	440	RYERNIEKISMLEKI	P30101	226	TVAYTEQKMTSGKIK	Q8TBZ0	706	KECEMLSKMVMETKT
P00734	446	EKISMLEKIYIHPRY	P30101	289	RVMMVAKKFLDAGHK	Q8TBZ2	184	ISAEGESKQKAPKEE
P00734	467	DRDIALMKLKKPVAF	P30101	366	GNLKRYLKSEPIPES	Q8TBZ9	78	QMFQSVLKHHLGEAV
P00734	470	IALMKLKKPVAFSDY	P30101	422	KYKELGEKLSKDPNI	Q8TC59	770	SINLTLTKWYSRVVF
P00734	498	SLLQAGYKGRVTGWG	P30153	133	AHFVPLVKRLAGGDW	Q8TCB6	145	LTLPRVTKIGVAAVV
P00734	508	VTGWGNLKETWTANV	P30153	561	STLQSEVKPILEKLT	Q8TCP9	272	VKTVNFIKGSSLNSR
P00734	537	IVERPVCKDSTRIRI	P30304	95	SPGPLDSKENLENPM	Q8TCS8	582	IQQASVAKKEILQIM
P00734	554	NMFCAGYKPDEGKRG	P30519	264	DGKGDMRKCPFYAAE	Q8TCS8	716	NTQLDQRKIKHPTAL
P00734	559	GYKPDEGKRGDACEG	P30519	274	FYAAEQDKGALEGSS	Q8TCS8	718	QLDQRKIKHPTALGL
P00734	575	SGGPFVMKSPFNNRW	P30556	230	KKAYEIQKNKPRNDD	Q8TCT8	106	EKARIAQKGGAEAML
P00734	99	TARTPRDKLAACLEG	P30838	214	VTLELGGKSPCYVDK	Q8TCT8	143	LIAFISYKDFRDMNQ
P00736	36	VTSPLFPKPYPNNFE	P31040	517	ELRLSMQKSMQNHAA	Q8TCU6	1217	IPSDKQDKLHGCLEH
P00736	399	TMGVNTYKARIQYYC	P31040	538	VLQEGCGKISKLYGD	Q8TCU6	1237	DSINALLKGPVMSRA
P00736	57	VPTGYRVKLVFQQFD	P31146	449	ATVQELQKRLDRLEE	Q8TCY9	705	VGVPGTGKSTLLNTM
P00738	136	NEKQWINKAVGDKLP	P31512	280	ITKGKKAKFIVNDEL	Q8TD16	193	EENISLQKQVSVLRQ
P00738	141	INKAVGDKLPECEAV	P31629	1541	REPFLPSKEMLSGSR	Q8TD16	310	FEHGGLAKLPLDNKT
P00738	170	LGGHLDAKGSFPWQA	P31629	1555	RAPLPGQKSSGPSES	Q8TD31	360	LEHSDSVKQLKGQVA
P00738	227	TLTLYVGKKQLVEIE	P31641	43	GKPPQREKWSSKIDF	Q8TD57	2529	EKADIVEKMQTAART
P00738	228	LTLYVGKKQLVEIEK	P31930	102	HLAFKGTKNRPGSAL	Q8TD84	1279	GRGNSSEKVTIEPAG
P00738	251	QVDIGLIKLKQKVSV	P31930	85	GSRFETEKNNGAGYF	Q8TD84	1287	VTIEPAGKAPAKIIS
P00738	253	DIGLIKLKQKVSVNE	P31946	51	NLLSVAYKNVVGARR	Q8TDF6	189	MSSPGLGKKRKVSLL
P00738	255	GLIKLKQKVSVNERV	P31947	124	RVFYLKMKGDYYRYL	Q8TDJ6	2638	YIFTKKRKQSEVEAD
P00738	270	MPICLPSKDYAEVGR	P32019	661	EIVRSLDKMENANIP	Q8TDJ6	940	LLSVPGQKNVDSSPE
P00738	291	WGRNANFKFTDHLKY	P32119	119	SEDYGVLKTDEGIAY	Q8TDJ6	969	ANLQTASKLILSSRL
P00738	297	FKFTDHLKYVMLPVA	P32119	135	GLFIIDGKGVLRQIT	Q8TDR0	420	PNPTEKQKGDSTSDA
P00738	321	EGSTVPEKKTPKSPV	P32119	16	GKPAPDFKATAVVDG	Q8TDV2	247	WRIYAEAKTSGIWGQ
P00738	322	GSTVPEKKTPKSPVG	P32119	26	AVVDGAFKEVKLSDY	Q8TDV5	108	FDRYLAIKQPFRYLK
P00738	325	VPEKKTPKSPVGVQP	P32119	29	DGAFKEVKLSDYKGK	Q8TDW0	224	PEKFVVDKSTAGALD
P00738	401	SIQDWVQKTIAEN**	P32322	47	ATVSALRKMGVKLTP	Q8TDY2	436	KLLDIKQKCTTAKQE
P00738	53	HSVRYQCKNYYKLRT	P32780	504	LERFQVTKLCPFQEK	Q8TDY2	441	KQKCTTAKQELANNL
P00738	71	GVYTLNDKKQWINKA	P32926	440	GYLMIDSKTAEIKFV	Q8TDZ2	637	SAVLFLSKLQRTLQR
P00738	77	DKKQWINKAVGDKLP	P32926	448	TAEIKFVKNMNRDST	Q8TDZ2	867	QALVAMEKEEKESPF
P00738	82	INKAVGDKLPECEAD	P33151	197	MYQILKGKEYFAIDN	Q8TDZ2	927	EEMKRFCKAQTIQRR
P00738	94	EADDGCPKPPEIAHG	P33151	213	GRIITITKSLDREKQ	Q8TE56	990	TCSSTCGKGLQSRVV
P00739	193	QVDIGLIKLKQKVLV	P33241	293	IVAGDMSKKSLWEQK	Q8TE60	330	NMVSGLFKDGTIGSD
P00739	195	DIGLIKLKQKVLVNE	P33241	294	VAGDMSKKSLWEQKG	Q8TE68	699	SLLEDKEKVSELEAV
P00740	440	EECAMKGKYGIYTKV	P33527	908	LVTDSAGKQLQRQLS	Q8TE73	1003	SNSASNMKQNSLPIF
P00740	446	GKYGIYTKVSRYVNW	P33908	141	EAKETLQKLPEEIQR	Q8TEC5	343	VITQPMEKADVPSSC
P00742	310	HEVEVVIKHNRFTKE	P33908	225	NELKPISKGGHSSSL	Q8TED9	393	MSRAAGRKITRIIGF
P00742	316	IKHNRFTKETYDFDI	P33908	304	GEEIFRKKAVELGVK	Q8TEK3	363	PTKGPEGKVAGPADA
P00742	378	GRQSTRLKMLEVPYV	P33908	435	KTDLEAKKMYFDAVQ	Q8TEX9	220	LIPIDEAKACEALEA
P00742	446	WGEGCARKGKYGIYT	P33981	710	ENGKSKSKISPKSDV	Q8TEY7	31	KQEKIPNKMSAFRNH
P00742	454	GKYGIYTKVTAFLKW	P33981	714	SKSKISPKSDVWSLG	Q8TF39	192	KKLEPFQKELYKEVL
P00747	104	KVYLSECKTGNGKNY	P34897	461	IGLEVKSKTAKLQDF	Q8TF40	669	DVKQYRDKLRTCFDA
P00747	15	LLLLLFLKSGQGEPL	P34932	272	RLSQECEKLKKLMSA	Q8TF76	751	WLHYLTDKMLKQMTF
P00747	277	GPTYQCLKGTGENYR	P34949	412	SLKLTEPKDLLIFRA	Q8TF76	754	YLTDKMLKQMTFKTK
P00747	38	ASLFSVTKKQLGAGS	P35052	338	NRDTLTAKVIQGCGN	Q8WTP9	91	NGPDDQGKILPKSEQ
P00747	39	SLFSVTKKQLGAGSI	P35221	704	KLDAEVSKWDDSGND	Q8WTT2	215	KKKLQEKKMHIAALA
P00747	411	MTPHRHQKTPENYPN	P35241	79	KENPLQFKFRAKFFP	Q8WU17	513	FNIYLQAKNGWKTFM
P00747	52	SIEECAAKCEEDEEF	P35247	213	DKGIPGDKGAKGESG	Q8WU43	21	ETLPLLKKVPANYFH
P00747	528	NPRAGLEKNYCRNPD	P35247	216	IPGDKGAKGESGLPD	Q8WU90	76	LKKDDKKKELQELNE
P00747	626	TAAHCLEKSPRPSSY	P35251	638	KFGKFSGKDDGSSFK	Q8WU90	86	QELNELFKPVVAAQK
P00747	634	SPRPSSYKVILGAHQ	P35318	33	VASEFRKKWNKWALS	Q8WU90	93	KPVVAAQKISKGADP
P00747	664	LFLEPTRKDIALLKL	P35523	346	MDFPFDLKELPAFAA	Q8WUD1	130	LESRRDVKREEGEAF
P00747	670	RKDIALLKLSSPAVI	P35527	212	YNTIDDLKDQIVDLT	Q8WUJ0	203	SGTTGSLKRTHEEED
P00747	680	SPAVITDKVIPACLP	P35527	224	DLTVGNNKTLLDIDN	Q8WUJ3	379	STEVVYKKGQDYRFA
P00747	96	RDVVLFEKKVYLSEC	P35542	107	EDSKSNEKAEEWGRS	Q8WUM0	518	ETIAQEDKIKLLKAA
P00748	146	QLLRFFHKNEIWYRT	P35542	128	FRPDGLPKKY*****	Q8WUQ7	214	LGTFIWNKALEKKGI
P00751	291	SNFTGAKKCLVNLIE	P35542	26	ESWRSFFKEALQGVG	Q8WUY3	637	YTEDMTQKATDTGHM
P00751	299	CLVNLIEKVASYGVK	P35542	74	PGGVWAAKLISRSRV	Q8WV16	131	NASSMLRKSQLGFLN
P00751	319	VTYATYPKIWVKVSE	P35555	1300	SGTCENTKGSFICHC	Q8WV37	285	QRIHTREKPYECNEC
P00751	337	SNADWVTKQLNEINY	P35568	56	NEKKWRHKSSAPKRS	Q8WV44	283	GHVEPLRKHLEAVQK
P00751	348	EINYEDHKLKSGTNT	P35568	844	LQPHLPRKVDTAAQT	Q8WV44	294	AVQKMKAKEERRVTE
P00751	350	NYEDHKLKSGTNTKK	P35573	1303	WLLELSKKNIFPYHE	Q8WV60	44	CRCPLGAKRYLLTDN
P00751	413	RDLLYIGKDRKNPRE	P35573	1330	SYDEWNRKIQDNFEK	Q8WV99	99	KRKIFTNKCERAGCR
P00751	416	LYIGKDRKNPREDYL	P35573	1337	KIQDNFEKLFHVSED	Q8WVF1	378	QPRLSTSKGDDLLAM
P00751	45	SLEGVEIKGGSFRLL	P35579	1022	SKSLAKLKNKHEAMI	Q8WVM8	497	LQYIKQWKAFTKMAS
P00751	454	DNEQHVFKVKDMENL	P35579	1099	VEEEAAQKNMALKKI	Q8WVQ1	231	LYVGGLGKEWTTTTG
P00751	486	GMVWEHRKGTDYHKQ	P35579	1219	KANLEKAKQTLENER	Q8WVQ1	249	NENPEWVKVVGYKGS
P00751	492	RKGTDYHKQPWQAKI	P35579	1234	GELANEVKVLLQGKG	Q8WVY7	65	DVKLGALKLKPNTKI
P00751	498	HKQPWQAKISVIRPS	P35579	1240	VKVLLQGKGDSEHKR	Q8WW12	133	PEAKMRMKNIGRDTP
P00751	538	DDKEHSIKVSVGGEK	P35579	1352	LEEEEEAKHNLEKQI	Q8WW38	86	DGDTQSEKPGQPGVE
P00751	565	NYNINGKKEAGIPEF	P35579	1357	EAKHNLEKQIATLHA	Q8WWH5	204	PPLYSALKKDGQRLS
P00751	583	DVALIKLKNKLKYGQ	P35579	1370	HAQVADMKKKMEDSV	Q8WWL2	560	MEKFLQNKELFSSLK
P00751	587	IKLKNKLKYGQTIRP	P35579	1404	LSQRHEEKVAAYDKL	Q8WWL7	906	QEKPSIKKETLLKKP
P00751	619	TTTCQQQKEELLPAQ	P35579	1454	DQLLAEEKTISAKYA	Q8WWP7	40	VGRTGAGKSATGNSI
P00751	629	LLPAQDIKALFVSEE	P35579	1492	LEEAMEQKAELERLN	Q8WWQ0	1247	EPGSPIVKSAKFVTD
P00751	638	LFVSEEEKKLTRKEV	P35579	1513	MEDLMSSKDDVGKSV	Q8WWQ2	118	AFLRFGGKRTDFLQF
P00751	639	FVSEEEKKLTRKEVY	P35579	1802	QEMEGTVKSKYKASI	Q8WWU7	210	PVKYRSGKCWNDNGP
P00751	643	EEKKLTRKEVYIKNG	P35579	1815	SITALEAKIAQLEEQ	Q8WWW8	333	STHSGSKKPECTLVP
P00751	668	QYAPGYDKVKDISEV	P35579	966	RQKLQLEKVTTEAKL	Q8WWZ4	1309	LELYAAVKGLGKEDA
P00751	670	APGYDKVKDISEVVT	P35579	989	ILEDQNCKLAKEKKL	Q8WWZ4	349	DSPLFFLKSSFWSKH
P00751	707	GGPLIVHKRSRFIQV	P35579	994	NCKLAKEKKLLEDRI	Q8WWZ4	355	LKSSFWSKHQNTHHE
P00751	753	FQVLPWLKEKLQDED	P35579	995	CKLAKEKKLLEDRIA	Q8WX92	292	GFLDGVKKGQEQVLG
P00751	755	VLPWLKEKLQDEDLG	P35580	1181	QEVAELKKALEEETK	Q8WX94	554	KQELLQCKAHLHANK
P00751	86	TGSWSTLKTQDQKTV	P35590	399	GTVLLSTKAIVEPEK	Q8WXD2	311	KTLIDFVKMMVKYGT
P00751	91	TLKTQDQKTVRKAEC	P35611	140	SDSIAYDKGEKLLRC	Q8WXD2	315	DFVKMMVKYGTISPE
P00915	128	VAHWNSAKYSSLAEA	P35611	143	IAYDKGEKLLRCKLA	Q8WXD9	518	LTAIGVTKPGHRKKI
P00915	138	SLAEAASKADGLAVI	P35611	235	YAARPDVKCVVHIHT	Q8WXH0	1200	IKERDTLKERERELQ
P00915	150	AVIGVLMKVGEANPK	P35612	173	DHFLISPKGVSCSEV	Q8WXH0	3339	TLQELVSKNSAMKEA
P00915	160	EANPKLQKVLDALQA	P35612	595	EEPGSPAKSAPASPV	Q8WXH0	3348	SAMKEAFKAQETEAE
P00915	169	LDALQAIKTKGKRAP	P35613	179	LKGGVVLKEDALPGQ	Q8WXH0	607	ACFEETKKEEIKEVP
P00915	35	NQSPVDIKTSETKHD	P35613	187	EDALPGQKTEFKVDS	Q8WXI7	9504	DESLAASKATTETEA
P00915	40	DIKTSETKHDTSLKP	P35613	227	PPRVKAVKSSEHINE	Q8WXK3	193	LHHAAKVKNVDLIEM
P00915	58	SYNPATAKEIINVGH	P35626	628	LFRIKGGKQFVLQCE	Q8WXU2	41	FCTENYLKVNFPPFL
P00915	81	NDNRSVLKGGPFSDS	P35626	644	DPEFVQWKKELNETF	Q8WXX0	1615	VGEPFGGKTSAYRVL
P00918	148	AVLGIFLKVGSAKPG	P35626	652	KELNETFKEAQRLLR	Q8WXX0	238	REKGDDKKTDELPAH
P00918	167	VDVLDSIKTKGKSAD	P35658	1059	SVATSASKIIPQGAD	Q8WXX0	2718	ICILKGIKADKIPDP
P00918	224	VSSEQVLKFRKLNFN	P35670	866	GEAMPVTKKPGSTVI	Q8WXX0	2730	PDPTGSGKKIEDFWG
P00966	49	EDFEEARKKALKLGA	P35716	140	SASQSPEKSAAGGGG	Q8WXX0	521	AENHSYEKIIDEICK
P00966	50	DFEEARKKALKLGAK	P35716	158	GGGAGGAKTSKGSSK	Q8WY36	134	QKYTDMAKEYKDAFM
P01008	102	YQHLADSKNDNDNIF	P35749	594	NASAWLTKNMDPLND	Q8WY36	148	MKANPGYKWCPTTNK
P01008	146	KFDTISEKTSDQIHF	P35749	685	CIIPNHEKRSGKLDA	Q8WY54	721	SSLTGSGKRNRIRSS
P01008	157	QIHFFFAKLNCRLYR	P35754	20	GKVVVFIKPTCPYCR	Q8WYA0	491	DDMSEMVKKLYSLVS
P01008	171	RKANKSSKLVSANRL	P35754	77	VPRVFIGKDCIGGCS	Q8WYJ6	331	LPLADTEKLIREKDE
P01008	208	KLQPLDFKENAEQSR	P35858	234	RNALRAIKANVFVQL	Q8WYJ6	336	TEKLIREKDEELRRM
P01008	260	FKGLWKSKFSPENTR	P35858	266	PGAFLGLKALRWLDL	Q8WYL5	46	SESFFMVKGAALFLQ
P01008	268	FSPENTRKELFYKAD	P35858	311	SLRPRTFKDLHFLEE	Q8WYL5	69	RSLQHPHKHAGDLPQ
P01008	273	TRKELFYKADGESCS	P35858	459	RLFQGLGKLEYLLLS	Q8WYL5	896	SLEGGSLKSPPPFFY
P01008	289	SMMYQEGKFRYRRVA	P36406	417	LGLDGAGKTTILFKL	Q8WYQ4	31	LTAHLRQKAGLPPDA
P01008	307	QVLELPFKGDDITMV	P36406	423	GKTTILFKLKQDEFM	Q8WYQ5	222	GAGGFTAKAIVQRDR
P01008	319	TMVLILPKPEKSLAK	P36551	104	QRAEMLPKTSGTRAT	Q8WZ33	91	DIHMSLEKDVTAMTN
P01008	322	LILPKPEKSLAKVEK	P36888	466	LPSWTWKKCSDKSPN	Q8WZ42	12623	DVPVKWFKDGEEIVP
P01008	382	LFSPEKSKLPGIVAE	P36888	470	TWKKCSDKSPNCTEE	Q8WZ42	12633	EEIVPSPKYSIKADG
P01008	435	NPNRVTFKANRPFLV	P36955	123	PDIHGTYKELLDTVT	Q8WZ42	15600	SRATPPTKAVDPIDA
P01008	61	IYRSPEKKATEDEGS	P36955	146	ASRIVFEKKLRIKSS	Q8WZ42	15609	VDPIDAPKVILRTSL
P01008	71	EDEGSEQKIPEATNR	P36955	147	SRIVFEKKLRIKSSF	Q8WZ42	16193	LLEGQEYKFRVIAKN
P01008	85	RRVWELSKANSRFAT	P36955	151	FEKKLRIKSSFVAPL	Q8WZ42	16199	YKFRVIAKNKFGCGP
P01009	149	LFLSEGLKLVDKFLE	P36955	160	SFVAPLEKSYGTRPR	Q8WZ42	16243	STITLDWKEPRSNGG
P01009	153	EGLKLVDKFLEDVKK	P36955	197	GKLARSTKEIPDEIS	Q8WZ42	16463	ITHYVIDKRDASRKK
P01009	159	DKFLEDVKKLYHSEA	P36955	225	VTKFDSRKTSLEDFY	Q8WZ42	17169	TLSWFPPKDDGGSKI
P01009	160	KFLEDVKKLYHSEAF	P36955	248	VPMMSDPKAVLRYGL	Q8WZ42	19418	PSRPVVAKDPIEPPG
P01009	178	FGDTEEAKKQINDYV	P36955	306	HDIDRELKTVQAVLT	Q8WZ42	21504	GPPGPPEKPEVSNVT
P01009	179	GDTEEAKKQINDYVE	P36955	316	QAVLTVPKLKLSYEG	Q8WZ42	21512	PEVSNVTKNTATVSW
P01009	187	QINDYVEKGTQGKIV	P36955	318	VLTVPKLKLSYEGEV	Q8WZ42	21922	PKHDGGSKITGYVIE
P01009	192	VEKGTQGKIVDLVKE	P36955	327	SYEGEVTKSLQEMKL	Q8WZ42	25673	VVWSKDGKELEETAA
P01009	198	GKIVDLVKELDRDTV	P36955	333	TKSLQEMKLQSLFDS	Q8WZ42	27932	ITHYIVEKRETSRVV
P01009	215	LVNYIFFKGKWERPF	P36955	345	FDSPDFSKITGKPIK	Q8WZ42	28031	ISGYFLEKRDKKSLG
P01009	225	WERPFEVKDTEEEDF	P36955	349	DFSKITGKPIKLTQV	Q8WZ42	32210	TYMAKFVKVKGTDQV
P01009	241	VDQVTTVKVPMMKRL	P36955	352	KITGKPIKLTQVEHR	Q8WZ42	32212	MAKFVKVKGTDQVLV
P01009	258	FNIQHCKKLSSWVLL	P36955	411	GALLFIGKILDPRGP	Q8WZ42	32220	GTDQVLVKKEISILN
P01009	298	LTHDIITKFLENEDR	P36955	48	EEEDPFFKVPVNKLA	Q8WZ42	33524	PTVTWLRKGQVLSTS
P01009	314	SASLHLPKLSITGTY	P36955	53	FFKVPVNKLAAAVSN	Q8WZ42	33540	RHQVTTTKYKSTFEI
P01009	324	ITGTYDLKSVLGQLG	P36957	277	FLKKHNLKLGFMSAF	Q8WZ42	33542	QVTTTKYKSTFEISS
P01009	334	LGQLGITKVFSNGAD	P36957	286	GFMSAFVKASAFALQ	Q8WZ42	5637	PISIQWFKDDQEISA
P01009	34	PQGDAAQKTDTSHHD	P37058	202	YSMYSASKAFVCAFS	Q8WZ42	6082	KSVDVTEKDPMTLEC
P01009	352	VTEEAPLKLSKAVHK	P37288	409	KDSPKSSKSIKFIPV	Q8WZ42	7262	LRILKVGKGDSGQYT
P01009	355	EAPLKLSKAVHKAVL	P37288	412	PKSSKSIKFIPVST*	Q8WZ42	7288	CSAQLSVKEPPKFVK
P01009	359	KLSKAVHKAVLTIDE	P37837	130	RRLIELYKEAGISKD	Q8WZ42	8810	DYSIEKGKPLILEGT
P01009	367	AVLTIDEKGTEAAGA	P37837	215	PLEDPGVKSVTKIYN	Q8WZ42	9938	TPREEIVKKPPPPTT
P01009	389	MSIPPEVKFNKPFVF	P37837	258	DFLTISPKLLGELLQ	Q8WZ42	9950	PTTLIPAKAPEIIDV
P01009	392	PPEVKFNKPFVFLMI	P37837	286	AQASDLEKIHLDEKS	Q8WZ64	185	IESLITKKTVDHTVE
P01009	404	LMIEQNTKSPLFMGK	P37840	45	LYVGSKTKEGVVHGV	Q8WZ69	162	ATNMQHCKCSIATSD
P01009	411	KSPLFMGKVVNPTQK	P38606	580	HMGDILYKLSSMKFK	Q8WZA1	271	RRRRFCSKVEGYGSV
P01009	49	QDHPTFNKITPNLAE	P38919	19	SARKRLLKEEDMTKV	Q92499	505	VRAIKEHKMDQAIIF
P01011	158	DRFTEDAKRLYGSEA	P38919	321	KERESIMKEFRSGAS	Q92508	2313	NFQRDLAKGGTVEYA
P01011	177	FQDSAAAKKLINDYV	P38935	585	SFVRSNRKGEVGFLA	Q92520	30	ISQVFEIKMDASLGN
P01011	178	QDSAAAKKLINDYVK	P39023	366	ALEKIDLKFIDTTSK	Q92520	62	RYKCGISKACPEKHF
P01011	191	VKNGTRGKITDLIKD	P39023	385	RFQTMEEKKAFMGPL	Q92526	223	ARHPDMKKRVEDAFI
P01011	197	GKITDLIKDLDSQTM	P39748	8	MGIQGLAKLIADVAP	Q92529	515	EAEGLLEKDGDFLVR
P01011	214	LVNYIFFKAKWEMPF	P40189	660	PNVPDPSKSHIAQWS	Q92540	956	MFNEVYGKNLTSSSK
P01011	216	NYIFFKAKWEMPFDP	P40197	109	TLRLSRNKITHLPGA	Q92545	1496	YTPPLESKQRRNLPS
P01011	235	QSRFYLSKKKWVMVP	P40222	384	KQQETHLKQQLALYT	Q92563	71	EVEDDYIKSWEDNQQ
P01011	297	MLLPETLKRWRDSLE	P40227	127	TEGFEAAKEKALQFL	Q92574	934	KKYLEDVKLQARGQL
P01011	315	IGELYLPKFSISRDY	P40227	129	GFEAAKEKALQFLEE	Q92608	395	GDIIQIRKDYPHLVD
P01011	340	IEEAFTSKADLSGIT	P40227	287	KVCGDSDKGFVVINQ	Q92610	471	SSGPRVPKGAAPGSQ
P01011	360	AVSQVVHKAVLDVFE	P40227	317	IVALRRAKRRNMERL	Q92610	481	APGSQTGKKQQSTAL
P01011	379	ASAATAVKITLLSAL	P40227	377	RSVTLLIKGPNKHTL	Q92613	725	ETTNRWVKNTEDLQC
P01011	416	QNIFFMSKVTNPKQA	P40227	388	KHTLTQIKDAVRDGL	Q92613	738	QCYVKPTKNMSPKEQ
P01011	67	LYKQLVLKAPDKNVI	P40306	219	VDACVITKTGAKLLR	Q92614	1324	AERLRAEKEMKELQT
P01019	179	TSRLDAHKVLSALQA	P40306	223	VITKTGAKLLRTLSS	Q92614	1337	QTQYDALKKQMEVME
P01019	250	ELDVAAEKIDRFMQA	P40306	37	LKVPHARKTGTTIAG	Q92614	1338	TQYDALKKQMEVMEM
P01019	370	QNSLNWMKKLSPRTI	P40692	461	GTSEMSEKRGPTSSN	Q92616	1336	HLDKSDPKVKPIVAK
P01019	61	LAKANAGKPKDPTFI	P40855	138	ETLSGLAKNATDLQN	Q92616	1338	DKSDPKVKPIVAKLI
P01019	63	KANAGKPKDPTFIPA	P40879	276	LLVVSIVKEINQRFK	Q92616	1343	KVKPIVAKLIAALST
P01019	75	IPAPIQAKTSPVDEK	P40925	142	TNCLTASKSAPSIPK	Q92624	219	LCALLFAKSHYDEAY
P01019	82	KTSPVDEKALQDQLV	P40925	248	SSAMSAAKAICDHVR	Q92625	472	KVVLVDGKTKDHRRS
P01019	94	QLVLVAAKLDTEDKL	P41091	285	VAGGSILKGVLKVGQ	Q92673	497	RRMPILSKESAPGLI
P01023	1003	LTPEIKSKAIGYLNT	P41208	100	MTQKMSEKDTKEEIL	Q92736	3455	ERKKMKRKGDRYSMQ
P01023	108	MFLTVQVKGPTQEFK	P41208	103	KMSEKDTKEEILKAF	Q92736	3471	SLIVAALKRLLPIGL
P01023	1133	FCLESAWKTAQEGDH	P41236	103	APDILARKLAAAEGL	Q92769	404	EDGEDPDKRISIRAS
P01023	1147	HGSHVYTKALLAYAF	P41236	113	AAEGLEPKYRIQEQE	Q92772	349	TNADPKIKDYKLFKI
P01023	115	KGPTQEFKKRTTVMV	P41250	426	KVGISPDKLRFRQHM	Q92772	352	DPKIKDYKLFKIKGS
P01023	1162	ALAGNQDKRKEVLKS	P41250	501	VVQFEPSKGAIGKAY	Q92786	75	NVLRKLLKRANSYED
P01023	1164	AGNQDKRKEVLKSLN	P41252	298	PLFDYFLKCKENGAF	Q92794	714	NDKQISIKKLSKLTG
P01023	1168	DKRKEVLKSLNEEAV	P41440	237	MNPGPGGKLGHALRV	Q92794	715	DKQISIKKLSKLTGI
P01023	1176	SLNEEAVKKDNSVHW	P42224	511	WQFSSVTKRGLNVDQ	Q92819	460	FAIATINKAGWGTSG
P01023	1177	LNEEAVKKDNSVHWE	P42224	525	QLNMLGEKLLGPNAS	Q92820	196	PLTANFHKWSLSVKN
P01023	123	KRTTVMVKNEDSLVF	P42263	523	EEVIDFSKPFMSLGI	Q92820	81	VRLDLTEKDYEILFK
P01023	1240	NIVKWITKQQNAQGG	P42285	549	KMSPTIGKQLLKGSA	Q92823	742	ASEQYLTKASEPDKN
P01023	1263	VALHALSKYGAATFT	P42336	941	FGHFLDHKKKKFGYK	Q92831	338	KDKLPLEKRTLILTH
P01023	1274	ATFTRTGKAAQVTIQ	P42336	942	GHFLDHKKKKFGYKR	Q92831	594	THLMNHLKEYHIKHD
P01023	1336	KYNILPEKEEFPFAL	P42356	1351	AAIGPRFKLLTLGLS	Q92835	1076	DRGEGPGKQVPAPRL
P01023	135	LVFVQTDKSIYKPGQ	P42356	927	FEDKAIQKDKSGMMQ	Q92837	85	AAAVPADKARSPAVP
P01023	1384	NMAIVDVKMVSGFIP	P42356	929	DKAIQKDKSGMMQCV	Q92839	354	LSMGYATKYTSRSRC
P01023	139	QTDKSIYKPGQTVKF	P42356	942	CVIAVADKVFDAFLN	Q92851	329	HIHNNVTKVEMEMVL
P01023	1393	VSGFIPLKPTVKMLE	P42681	337	YGVCIQRKPLYIVTE	Q92859	253	ISDLVFLKQPSPLVR
P01023	1397	IPLKPTVKMLERSNH	P42684	658	GFFSSFMKKRNAPTP	Q92859	966	KDVTVVSKEGKPKTI
P01023	145	YKPGQTVKFRVVSMD	P42695	1155	VLSSKEIKLLAMRSK	Q92879	83	QNALHNMKVLPGMHH
P01023	1469	EYNAPCSKDLGNA**	P42772	29	AARGLVEKVRQLLEA	Q92882	104	VGVNGLDKAGSTALY
P01023	171	LVYIQDPKGNRIAQW	P43121	217	AQLVKEDKDAQFYCE	Q92882	119	WACHGGHKDIVEMLF
P01023	188	FQLEGGLKQFSFPLS	P43121	236	LPSGNHMKESREVTV	Q92889	438	FLLRLYRKTFEKDSK
P01023	204	EPFQGSYKVVVQKKS	P43246	90	MNFESFVKDLLLVRQ	Q92889	442	LYRKTFEKDSKAEEV
P01023	271	VTVSICRKYSDASDC	P43251	176	LVANLGTKEPCHSSD	Q92890	42	NDRSDVEKGGKIIMP
P01023	28	TDASVSGKPQYMVLV	P43353	360	EFINRREKPLALYAF	Q92890	45	SDVEKGGKIIMPPSA
P01023	305	GCFYQQVKTKVFQLK	P43358	133	RAKELVTKAEMLERV	Q92896	1048	IKTELCKKEVLNMLK
P01023	307	FYQQVKTKVFQLKRK	P43361	135	QIKEPVTKAEMLESV	Q92896	1058	LNMLKESKADIFVDP
P01023	312	KTKVFQLKRKEYEMK	P43366	35	AHATAAEKEECPSSS	Q92922	846	KELTDTCKERESDTG
P01023	349	EITRTITKLSFVKVD	P43652	130	LCFFYNKKSDVGFLP	Q92925	514	VGRHIFAKVQQRRQE
P01023	354	ITKLSFVKVDSHFRQ	P43652	147	PTLDPEEKCQAYESN	Q92954	1230	IKDAGYPKPIFKGFG
P01023	375	QVRLVDGKGVPIPNK	P43652	198	SCCEEQNKVNCLQTR	Q92954	1234	GYPKPIFKGFGGLTG
P01023	382	KGVPIPNKVIFIRGN	P43652	214	IPVTQYLKAFSSYQK	Q92954	1274	SIQQYIYKQEPVQKC
P01023	516	GTHGLLVKQEDMKGH	P43652	221	KAFSSYQKHVCGALL	Q92954	1330	ARLAYQDKGVLHNEV
P01023	531	FSISIPVKSDIAPVA	P43652	283	QCIRDTSKVMNHICS	Q92954	1372	YDYYAFSKDQYYNID
P01023	557	DVIGDSAKYDVENCL	P43652	291	VMNHICSKQDSISSK	Q92954	280	ETSLTVNKETTVETK
P01023	567	VENCLANKVDLSFSP	P43652	319	QCIINSNKDDRPKDL	Q92954	894	KALENSPKEPGVPTT
P01023	608	DQSVLLMKPDAELSA	P43652	324	SNKDDRPKDLSLREG	Q92954	972	TQDTTPFKITTLKTT
P01023	664	PVSSTNEKDMYSFLE	P43652	332	DLSLREGKFTDSENV	Q92954	984	KTTTLAPKVTTTKKT
P01023	676	FLEDMGLKAFTNSKI	P43652	353	DPDTFFAKFTFEYSR	Q92959	485	NMSSATSKQLIYLNC
P01023	682	LKAFTNSKIRKPKMC	P43652	378	LRIVQIYKDLLRNCC	Q92995	18	PGGSGGRKMAAGDIG
P01023	811	RGEAFTLKATVLNYL	P43652	417	KMVQQECKHFQNLGK	Q93008	1435	EGHLGVTKELLAFQT
P01023	820	TVLNYLPKCIRVSVQ	P43652	424	KHFQNLGKDGLKYHY	Q93034	137	VEDSIVRKLMLDTWN
P01023	896	SVPEHGRKDTVIKPL	P43652	428	NLGKDGLKYHYLIRL	Q93070	190	YEVHYRTKDVHFNAY
P01023	901	GRKDTVIKPLLVEPE	P43652	500	PAVDHCCKTNFAFRR	Q93070	85	TQGDYFTKDIEAQKN
P01023	912	VEPEGLEKETTFNSL	P43652	514	RPCFESLKADKTYVP	Q93084	169	DLRLIEIKSTTLRVD
P01024	1001	AVDAERLKHLIVTPS	P43652	546	QNEELQRKTDRFLVN	Q93084	728	GSGTAVAKSAAEMVL
P01024	1050	QGALELIKKGYTQQL	P43652	558	LVNLVKLKHELTDEE	Q93086	200	KNHIRFPKFNFSKSN
P01024	1051	GALELIKKGYTQQLA	P43652	596	CFNEESPKIGN****	Q93086	212	KSNVMDVKDRSFLKS
P01024	1071	SAFAAFVKRAPSTWL	P43652	65	ATFEEMEKLVKDMVE	Q969F9	698	DMHRNEMKSHSEMKL
P01024	1113	WLILEKQKPDGVFQE	P43652	68	EEMEKLVKDMVEYKD	Q969H8	156	AHRPGAFKAELSKLV
P01024	1155	LISLQEAKDICEEQV	P43652	74	VKDMVEYKDRCMADK	Q969N2	198	KLLPCSSKAGLSVLL
P01024	1209	LKGPLLNKFLTTAKD	P43652	88	KTLPECSKLPNNVLQ	Q969N2	206	AGLSVLLKADRLFHT
P01024	1215	NKFLTTAKDKNRWED	P43652	97	PNNVLQEKICAMEGL	Q969Q1	291	KSIVEASKGCQLGKT
P01024	1217	FLTTAKDKNRWEDPG	P43686	212	YGPPGCGKTMLAKAV	Q969Q4	75	APLRASWKDYLEGTD
P01024	1225	NRWEDPGKQLYNVEA	P45379	185	AEDEARKKKALSNMM	Q969Q6	141	CKQFFTAKVFAKLLH
P01024	1244	LLALLQLKDFDFVPP	P45379	186	EDEARKKKALSNMMH	Q969V6	443	VASSGVVKFGSTGST
P01024	1325	LLRSEETKENEGFTV	P45983	288	PADSEHNKLKASQAR	Q969X5	199	VPTVYEDKSGKQRYS
P01024	1351	VVTMYHAKAKDQLTC	P46013	1671	TEPTGDGKSMKAFME	Q969Z0	60	SLMEPVEKERASTPY
P01024	1353	TMYHAKAKDQLTCNK	P46013	2240	TIFKPQSKRSLRKAD	Q96A65	135	LDEIENIKQVPQKLE
P01024	1360	KDQLTCNKFDLKVTI	P46013	2822	MTDDKTTKIPCKSSP	Q96AP4	77	YGTSDNKKDNTLQCG
P01024	1364	TCNKFDLKVTIKPAP	P46013	2826	KTTKIPCKSSPELED	Q96AQ2	84	LALLVLVKQLMSSAV
P01024	1368	FDLKVTIKPAPETEK	P46013	3189	LMQNQKGKGEAGNSD	Q96AX1	468	NNYPTIRKTLRLWMD
P01024	1375	KPAPETEKRPQDAKN	P46019	101	RQVAKVEKFKHTQST	Q96B23	2	******MKMEEAVGK
P01024	1381	EKRPQDAKNTMILEI	P46019	103	VAKVEKFKHTQSTKD	Q96B23	21	IESEAPPKASEQETA
P01024	1431	GVDRYISKYELDKAF	P46019	707	LSVMAKAKGLEVPFV	Q96B23	9	KMEEAVGKVEELIES
P01024	1436	ISKYELDKAFSDRNT	P46019	721	VPMTLPTKVLSAHRK	Q96B97	68	KKDPLTNKAPEKPLH
P01024	1450	TLIIYLDKVSHSEDD	P46019	98	CMMRQVAKVEKFKHT	Q96BA8	480	DSTHETTKYLSEAWP
P01024	1497	TRFYHPEKEDGKLNK	P46020	1205	GTMTYLSKAAATYVQ	Q96BA8	502	SPDFSHSKEWFHDRD
P01024	1501	HPEKEDGKLNKLCRD	P46100	1830	LTKFLPPKHEYVLAV	Q96BD8	82	ESLEEDYKDIEHLKE
P01024	1504	KEDGKLNKLCRDELC	P46100	330	NCNGEEKKLDDSCSG	Q96BM0	49	AASSIAAKMMSTAAI
P01024	1526	FIQKSDDKVTLEERL	P46100	354	IVPKEMIKKAKKLIE	Q96BP3	394	RCVRILGKQENIRVM
P01024	1535	TLEERLDKACEPGVD	P46100	355	VPKEMIKKAKKLIET	Q96BR9	119	SVCKTFIKSSLDISE
P01024	1546	PGVDYVYKTRLVKVQ	P46379	1052	GMPAKRRKTMQGEGP	Q96BT1	282	TMRKYKLKNMTTKGP
P01024	155	RIFTVNHKLLPVGRT	P46459	293	NGPEILNKYVGESEA	Q96BV0	519	SQKQHLLKHQRVHRA
P01024	1599	EALKLEEKKHYLMWG	P46597	107	TSQCSMLKYMGRTSY	Q96BY6	528	SGAEPYIKNPDSNKY
P01024	225	FSTEFEVKEYVLPSF	P46776	59	YFGKVGMKHYHLKRN	Q96C45	216	LYEMFSGKPPFFSES
P01024	305	GEVVLSRKVLLDGVQ	P46821	555	AAKPLPSKSVRKESK	Q96CP2	53	TASKDSTKVAGAKRK
P01024	359	PYQIHFTKTPKYFKP	P46821	631	QATDVKPKAAKEKTV	Q96CW1	308	LEVKVVIKSNFKPSL
P01024	362	IHFTKTPKYFKPGMP	P46939	1919	NIKDQLDKLGEQIAV	Q96CW1	319	KPSLLAQKIEVRIPT
P01024	418	INTHPSQKPLSITVR	P46939	2573	MSLEELIKWLNMKDE	Q96DA0	87	SVGLLLVKSVQVKLG
P01024	427	LSITVRTKKQELSEA	P46939	561	KVQTSNFKDQKELSV	Q96DA0	92	LVKSVQVKLGDSWDV
P01024	428	SITVRTKKQELSEAE	P46940	1445	MKKSKSVKEDSNLTL	Q96DI7	184	KLWDIRKKAAIQTFQ
P01024	566	CVGSLVVKSGQSEDR	P46976	342	ADSFDNIKRKLDTYL	Q96DT5	1963	SVVAVQVKMIHDAIR
P01024	584	PGQQMTLKIEGDHGA	P46976	344	SFDNIKRKLDTYLQ*	Q96DT5	3161	IADAEERKVTAIQTE
P01024	600	VVLVAVDKGVFVLNK	P47755	147	VCTVYGKKIDGQQTI	Q96DT5	428	QVAVNILKTFKNSFF
P01024	607	KGVFVLNKKNKLTQS	P47756	95	MPSARLRKLEVEANN	Q96DY7	489	LKRRKLAKQPETVSV
P01024	608	GVFVLNKKNKLTQSK	P47869	231	SIGKETIKSSTGEYT	Q96DZ5	437	GIVRFYGKTDFAPGY
P01024	610	FVLNKKNKLTQSKIW	P47869	247	MTAHFHLKRKIGYFV	Q96EA4	563	PRLAAESKLQTEVKE
P01024	615	KNKLTQSKIWDVVEK	P48052	349	SLHGTKYKVGPICSV	Q96EN8	570	TQPTPSEKAAGVLEG
P01024	622	KIWDVVEKADIGCTP	P48058	386	LKSTGPRKVGYWNDM	Q96EV2	735	ATPSAQVKPIVSASP
P01024	678	RSVQLTEKRMDKVGK	P48058	848	RAEAKRMKLTFSEAI	Q96F15	35	LRIILVGKTGCGKSA
P01024	682	LTEKRMDKVGKYPKE	P48169	487	GSRLQRIKTTVNTIG	Q96F15	56	GQPVFESKLRAQSVT
P01024	688	DKVGKYPKELRKCCE	P48169	517	PSGSGTSKIDKYARI	Q96F24	46	AYLSEAMKLTQSEQA
P01024	721	ISLGEACKKVFLDCC	P48426	395	VNPEQYSKRFLDFIG	Q96FC9	778	LLSVVGGKMSEGINF
P01024	722	SLGEACKKVFLDCCN	P48426	73	FKAYSKIKVDNHLFN	Q96FJ0	403	MLEVSACKKKGFHPH
P01024	789	PKNGISTKLMNIFLK	P48426	89	ENMPSHFKFKEYCPM	Q96FJ0	404	LEVSACKKKGFHPHT
P01024	861	YRQNQELKVRVELLH	P48443	357	VLTELVSKMKDMQMD	Q96FN4	174	DKKDLFGKSDPFLEF
P01024	879	FCSLATTKRRHQQTV	P48553	1205	QPDSSSLKSRGSVHS	Q96FN4	189	YKPGDDGKWMLVHRT
P01024	891	QTVTIPPKSSLSVPY	P48556	297	ILFFNTPKKMTDYAK	Q96FV9	272	EEVLAVFKSYKLDDT
P01024	904	PYVIVPLKTGLQEVE	P48556	298	LFFNTPKKMTDYAKK	Q96GC6	526	PRYFSVHKKIHTGER
P01024	913	GLQEVEVKAAVYHHF	P48556	304	KKMTDYAKKRGWVLG	Q96GC9	6	**MAENGKNCDQRRV
P01024	930	DGVRKSLKVVPEGIR	P48594	124	QEYLDAIKKFYQTSV	Q96GE4	207	CPNEMLSKKALASPS
P01024	959	LGREGVQKEDIPPAD	P48594	125	EYLDAIKKFYQTSVE	Q96GE5	502	RRTHTGEKPYECNTC
P01031	1048	EKQKLKKKLKEGMLS	P48594	189	FKGQWENKFKKENTK	Q96GM8	45	DVQSNNFKEMWPSLL
P01031	1050	QKLKKKLKEGMLSIM	P48594	327	SHGLSVSKVLHKAFV	Q96GR2	54	TDRQPLSKESLNHAL
P01031	109	VYLEVVSKHFSKSKR	P48637	12	WGSLLQDKQQLEELA	Q96GY0	33	FFPVALKKHGPICQK
P01031	1163	FDICPLVKIDTALIK	P48637	443	EKTLVMNKHVGHLLR	Q96GY0	44	ICQKTATKKRKTFDS
P01031	1219	LKREALVKGNPPIYR	P48643	170	EPLIQTAKTTLGSKV	Q96H22	26	NELTTILKAWDFLSE
P01031	1235	WKDNLQHKDSSVPNT	P48643	42	KSHIMAAKAVANTMR	Q96HE7	402	FKCRLWGKLQTQGLG
P01031	1262	LLTSLNLKDINYVNP	P48723	269	RLLQYLYKQIYQTYG	Q96HE7	419	LKILFSEKLIANMPE
P01031	1305	TEYSLLVKQLRLSMD	P48729	152	GIGRHCNKLFLIDFG	Q96HP4	67	REIVSAAKVCGAASE
P01031	1318	MDIDVSYKHKGALHN	P48736	980	KSFLGINKERVPFVL	Q96HW7	62	YLLQFARKPVEAESV
P01031	1327	KGALHNYKMTDKNFL	P48740	318	KIEPSQAKYFFKDQV	Q96HY7	456	YKIIRARKSIPDTYA
P01031	1400	GYGNSDYKRIVACAS	P48740	337	DTGYKVLKDNVEMDT	Q96HY7	487	IKSSYYAKLNDHLNN
P01031	142	YTPDQSVKVRVYSLN	P48740	515	LLSPSDFKIILGKHW	Q96I25	289	ATEKDASKKSDSNPL
P01031	1549	TISAETRKQTACKPE	P49221	175	VGAARSIKCKPWNFG	Q96I25	327	EDLEVETKEECEKYG
P01031	156	NDDLKPAKRETVLTF	P49281	206	LDKYGLRKLEAFFGF	Q96IY4	146	RHPDMLTKIHIGSSF
P01031	1576	TVENVFVKYKATLLD	P49281	230	GYEYVTVKPSQSQVL	Q96IY4	155	HIGSSFEKYPLYVLK
P01031	1578	ENVFVKYKATLLDIY	P49326	411	EMMAEISKAQEEIDK	Q96IY4	326	PYSYTRSKSKDHEEL
P01031	1594	TGEAVAEKDSEITFI	P49419	17	VHAAKTSKLSGPWSR	Q96IY4	328	SYTRSKSKDHEELSL
P01031	1613	CTNAELVKGRQYLIM	P49441	115	SKVLNGNKVASEALA	Q96IY4	414	EAFAAVSKIAWHVIR
P01031	1622	RQYLIMGKEALQIKY	P49454	2727	EMHEMAQKTAELQEE	Q96J87	41	PGPAVPMKDHDAIKL
P01031	206	WTIKAKYKEDFSTTG	P49454	2739	QEELSGEKNRLAGEL	Q96J87	465	NGFQIGMKRLKVQLK
P01031	241	EYNFIGYKNFKNFEI	P49588	366	DAFPELKKDPDMVKD	Q96JB1	1728	IMQVTNQKFLDILNT
P01031	244	FIGYKNFKNFEITIK	P49589	503	DKKTAIHKALCDNVD	Q96JB2	264	SKALHLMKTYTVNTL
P01031	251	KNFEITIKARYFYNK	P49643	314	MQYGLFLKGIGLTLE	Q96JB2	280	TLTSQLLKRDPSSVP
P01031	353	KYVLSPYKLNLVATP	P49643	335	KQEFIKGKMDPDKFD	Q96JE9	692	VVVPEHAKVHDSAVV
P01031	364	VATPLFLKPGIPYPI	P49675	155	NPNVKEIKVLQKIGK	Q96JG9	3673	KFPVHPRKAVGSLAP
P01031	372	PGIPYPIKVQVKDSL	P49703	59	TKGFNTEKIRVPLGG	Q96JG9	3692	RGTENGMKPATPKAK
P01031	376	YPIKVQVKDSLDQLV	P49720	17	AVMAMKGKNCVAIAA	Q96JG9	3697	GMKPATPKAKPGPSS
P01031	408	TSDLDPSKSVTRVDD	P49720	77	RLNLYELKEGRQIKP	Q96JG9	374	PFSDSLHKSLTKILP
P01031	495	PKSPYIDKITHYNYL	P49721	29	ASNIVQMKDDHDKMF	Q96JI7	1983	NLEVLTSKCLHGKNY
P01031	63	IKSYPDKKFSYSSGH	P49753	260	YNYEDLPKTMETLHL	Q96JI7	1988	TSKCLHGKNYCRQVL
P01031	681	RPRRTLQKKIEEIAA	P49755	133	MKHGVEAKNYEEIAK	Q96JI7	660	FMIKFPWKLTDAIDE
P01031	682	PRRTLQKKIEEIAAK	P49755	145	IAKVEKLKPLEVELR	Q96JI7	676	DVHENVPKVKESNIW
P01031	689	KIEEIAAKYKHSVVK	P49755	75	GGLRSHLKITDSAGH	Q96JI7	798	DFVHQVEKLYLGHFQ
P01031	691	EEIAAKYKHSVVKKC	P49755	87	AGHILYSKEDATKGK	Q96JJ6	359	RRGKVKEKVDRAVEG
P01031	726	SLGPRCIKAFTECCV	P49756	722	LDYGEDDKNATKGTV	Q96JJ6	410	VEAARMAKLIAQDLQ
P01031	755	QLGRLHMKTLLPVSK	P49770	237	NKVIIGTKTILANGA	Q96JM2	1117	STELYYCKHCSYSNR
P01031	762	KTLLPVSKPEIRSYF	P49770	259	HTLALAAKHHSTPLI	Q96JM2	622	LRVHQQHKHSFCDNL
P01031	784	VHLVPRRKQLQFALP	P49770	273	IVCAPMFKLSPQFPN	Q96JM2	631	SFCDNLPKFEGQPSS
P01031	818	VADTVKAKVFKDVFL	P49790	194	FSSRASDKDITVSKN	Q96JM7	56	ENEMENVKKATATTT
P01031	821	TVKAKVFKDVFLEMN	P49796	1029	RKSKNLAKDMKNKLG	Q96JP5	129	DKDPKEEKEEEDDSA
P01031	842	RGEQIQLKGTVYNYR	P49796	243	GCMSFGVKSLLTPDK	Q96K30	77	ASKALGAKGSCETTP
P01031	957	YGTISRRKEFPYRIP	P49815	574	LLVILQTKLYTLPAS	Q96K31	356	SSEEFEDKWFRKIKD
P01031	970	IPLDLVPKTEIKRIL	P49841	27	PSAFGSMKVSRDKDG	Q96K37	119	VLPLAFGKYFASVSA
P01034	62	FAVGEYNKASNDMYH	P49848	191	GATTADGKGKEKKAP	Q96K76	1361	PRKEKALKIYLDGAP
P01042	101	CEYKDAAKAATGECT	P49863	101	KQTLEIKKFIPFSRV	Q96K76	1370	YLDGAPNKDLTQD**
P01042	113	ECTATVGKRSSTKFS	P49863	127	VKLQTAAKLNKHVKM	Q96K76	844	SKRTAYQKAGGDSGN
P01042	254	NCDIYPGKDFVQPPT	P49916	463	HNAQEVEKEPGQRRA	Q96K80	118	LPPRLRQKVAAGLGL
P01042	262	DFVQPPTKICVGCPR	P50213	339	FATIKDGKSLTKDLG	Q96KM6	566	TMAEHSAKPSDAEAS
P01042	315	RVQVVAGKKYFIDFV	P50213	343	KDGKSLTKDLGGNAK	Q96KN2	362	AFDEPGTKTVIPGRV
P01042	316	VQVVAGKKYFIDFVA	P50219	322	GGGGGAGKGGAEEPG	Q96KN2	455	GSTIPIAKMFQEIVH
P01042	344	TESCETKKLGQSLDC	P50222	263	EKELVNVKKGTLLPS	Q96KR7	111	GREELIKKGLLEMME
P01042	363	YVVPWEKKIYPTVNC	P50222	264	KELVNVKKGTLLPSE	Q96KX2	102	DLLQNQLKDIQSHGI
P01042	42	KAVDAALKKYNSQNQ	P50281	173	YIREGHEKQADIMIF	Q96L12	102	YTVKHEQKMDCGGGY
P01042	43	AVDAALKKYNSQNQS	P50395	293	YVKDRVEKVGQVIRV	Q96L21	187	EFEDMVAKKCLIPDG
P01042	478	LGHGHKFKLDDDLEH	P50395	379	LLEPIEQKFVSISDL	Q96L91	1055	NIGKPNAKDIADVTA
P01042	64	YRITEATKTVGSDTF	P50416	285	AILLYRRKLDREEIK	Q96L91	1179	IGSHRELKAKRQEWA
P01042	75	SDTFYSFKYEIKEGD	P50416	403	QAYFGRGKNKQSLDA	Q96L93	1107	SLPVSAEKSHLVPLM
P01042	79	YSFKYEIKEGDCPVQ	P50440	392	KLGITTIKVNIRNAN	Q96L96	851	DAGTQESKRPQSDRS
P01042	89	DCPVQSGKTWQDCEY	P50461	42	FHCMACRKALDSTTV	Q96LA5	250	ATGTSMGKKTQRSLS
P01042	97	TWQDCEYKDAAKAAT	P50542	300	AELEEMAKRDAEAHP	Q96LA5	251	TGTSMGKKTQRSLSA
P01210	259	KEVPEMEKRYGGFMR	P50552	240	AKLRKVSKQEEASGG	Q96LW4	119	YFDLEFNKPANPGAD
P01344	89	TYCATPAKSERDVST	P50552	252	SGGPTAPKAESGRSG	Q96LW4	140	LLIEYVCKALQELYG
P01589	37	EIPHATFKAMAYKEG	P50553	100	SPELMRCKRRLNFSG	Q96M34	476	FSEIDQGKGYHIRNQ
P01589	52	TMLNCECKRGFRRIK	P50579	278	PKYDTLLKAVKDATN	Q96M89	19	DLVVESLKSRYGLGG
P01602	72	APKLLIYKASSLESG	P50579	281	DTLLKAVKDATNTGI	Q96M89	7	*MEPRVVKPPGQDLV
P01603	103	RTFGQGTKVDLKR**	P50579	289	DATNTGIKCAGIDVR	Q96MC4	394	AGTPRGKKMADPEML
P01614	81	SGTDFTLKISRVQAE	P50579	318	YEVEIDGKTYQVKPI	Q96MC4	420	EAQQAASKTDLKTFM
P01712	55	LMIYDVDKRPSGVPD	P50895	146	ARLNVFAKPEATEVS	Q96ME1	585	PALSDMLKHCKRLRD
P01742	38	KKPGSSVKVSCKASG	P50895	458	KTAEIEPKADGSWRE	Q96MH7	453	NILPLVLKESLIPSV
P01764	117	TAVYYCAK*******	P50990	37	YRNIQACKELAQTTR	Q96MX6	353	VRVLIVTKLNKI***
P01764	95	TISRDNSKNTLYLQM	P50990	440	LEQYAIKKFAEAFEA	Q96MY7	630	EQPASPRKVLEELSH
P01773	76	TISRBISKBTLYLZM	P51003	475	YRQAINSKMFEVDMK	Q96N16	569	TNQDLLEKIYRLEME
P01781	76	TISRDNAKNSLYLQM	P51157	181	AAEILGIKLNKAEIE	Q96N22	441	SSNLTEHKNIHTEEK
P01817	92	KSRLTITKDTSKNQV	P51398	298	HNLRKMMKNDWHGGA	Q96N22	451	HTEEKPYKCEECGKA
P01834	37	NFYPREAKVQWKVDN	P51508	174	YEYKDFGKFVHPSPN	Q96N23	2505	SPSSKTGKLNLLTRA
P01834	41	REAKVQWKVDNALQS	P51522	486	HTGEKHFKCNECGKL	Q96N23	323	FARRALAKIDELRQL
P01834	61	SVTEQDSKDSTYSLS	P51523	494	YECSECGKAFSEKLS	Q96N23	337	LELMSSSKSQEESRR
P01834	75	SSTLTLSKADYEKHK	P51532	1027	DGSEKDKKGKGGTKT	Q96N38	497	NQSSTLTKHRKIQQG
P01834	80	LSKADYEKHKVYACE	P51587	1015	SFRTASNKEIKLSEH	Q96N38	500	STLTKHRKIQQGMVA
P01834	82	KADYEKHKVYACEVT	P51587	513	FRIRESPKETFNASF	Q96N38	545	PSLLKIQKFAGCGGR
P01834	99	GLSSPVTKSFNRGEC	P51654	294	AGVVEIDKYWREYIL	Q96N96	567	RRRVQEDKEMGMEIS
P01857	105	VEPKSCDKTHTCPPC	P51659	46	NDLGGDFKGVGKGSL	Q96ND8	68	GKEPWMVKKEGTRGP
P01857	129	SVFLFPPKPKDTLMI	P51665	214	DIRSYLEKVATGKLP	Q96ND8	69	KEPWMVKKEGTRGPC
P01857	131	FLFPPKPKDTLMISR	P51687	494	AWRLWQLKAPVPAGQ	Q96NG3	468	EKALERAKLVHNNEA
P01857	16	FPLAPSSKSTSGGTA	P51687	509	KELNIVCKAVDDGYN	Q96NI6	16	FLIGIAVKAQICPKR
P01857	171	GVEVHNAKTKPREEQ	P51689	378	GGWNGIYKGGKGMGG	Q96NI6	3	*****MEKILFYLFL
P01857	173	EVHNAKTKPREEQYN	P51689	381	NGIYKGGKGMGGWEG	Q96NI8	76	GKAPWMVKRELTKGL
P01857	200	HQDWLNGKEYKCKVS	P51693	516	GLQPPDSKDDTPMTL	Q96NJ3	211	GRHPNCGKNLGMKST
P01857	205	NGKEYKCKVSNKALP	P51693	539	AASPEKEKMNPLEQY	Q96NJ3	221	GMKSTVEKRNAAHVL
P01857	209	YKCKVSNKALPAPIE	P51797	679	RKRSQSMKSYPSSEL	Q96NN9	593	ELFVLHSKTGDMSWL
P01857	217	ALPAPIEKTISKAKG	P51813	610	WEVFSLGKQPYDLYD	Q96NR3	619	MLRNSFLKAPQFSHF
P01857	221	PIEKTISKAKGQPRE	P51813	624	DNSQVVLKVSQGHRL	Q96NR3	634	QEDIIFSKKYNDEVD
P01857	223	EKTISKAKGQPREPQ	P51816	1190	RSLMEYFKQNASKVA	Q96NR8	117	EGFLAEEKQLHILIN
P01857	243	PSRDELTKNQVSLTC	P51816	1195	YFKQNASKVAQIPSP	Q96P31	135	THQKVYYKDGKQLPN
P01857	253	VSLTCLVKGFYPSDI	P51825	879	SSSQKPAKPALKRSR	Q96P31	148	PNSYNLEKITVNSVS
P01857	292	GSFFLYSKLTVDKSR	P51858	21	DLVFAKMKGYPHWPA	Q96P44	655	QPGTPGSKGSKGEPG
P01857	30	AALGCLVKDYFPEPV	P51858	39	EMPEAAVKSTANKYQ	Q96P48	464	YVAVVGDKVQLYKNL
P01857	88	YICNVNHKPSNTKVD	P51858	44	AVKSTANKYQVFFFG	Q96P50	38	AKLDKLVKLCSGMVE
P01859	101	VDKTVERKCCVECPP	P51884	114	IKGRVFSKLKQLKKL	Q96P66	497	TEGGTEGKIVPSYDS
P01859	125	SVFLFPPKPKDTLMI	P51884	116	GRVFSKLKQLKKLHI	Q96PB1	126	ENIPFEDKTASVKVD
P01859	196	HQDWLNGKEYKCKVS	P51884	148	DLQLTHNKITKLGSF	Q96PC5	24	TKCLESTKLLADLKK
P01859	199	WLNGKEYKCKVSNKG	P51884	172	HLQHNRLKEDAVSAA	Q96PC5	3	*****MAKFGVHRIL
P01859	201	NGKEYKCKVSNKGLP	P51884	181	DAVSAAFKGLKSLEY	Q96PC5	595	SQNYISQKEDASEFQ
P01859	205	YKCKVSNKGLPAPIE	P51884	184	SAAFKGLKSLEYLDL	Q96PD5	106	RHDVREGKEYGVVLA
P01859	239	PSREEMTKNQVSLTC	P51884	216	TLYLDNNKISNIPDE	Q96PD5	207	QASLPDAKAKSPPTM
P01859	249	VSLTCLVKGFYPSDI	P51884	226	NIPDEYFKRFNALQY	Q96PD5	398	APYRGRPKLLQLPLG
P01859	271	GQPENNYKTTPPMLD	P51884	267	DLSYNKLKNIPTVNE	Q96PD5	40	ALAELEQKVPAAKTR
P01860	101	VDKRVELKTPLGDTT	P51884	288	LEVNQLEKFDIKSFC	Q96PE2	1179	KDAVRVAKEARPAFL
P01860	118	CPRCPEPKSCDTPPP	P51884	292	QLEKFDIKSFCKILG	Q96PE2	545	TATLRRAKSFTCSEK
P01860	133	CPRCPEPKSCDTPPP	P51884	296	FDIKSFCKILGPLSY	Q96PM9	226	HNKGTKHKTILEARS
P01860	148	CPRCPEPKSCDTPPP	P51884	305	LGPLSYSKIKHLRLD	Q96PN6	1288	HIFNLPLKGEGIEIV
P01860	176	SVFLFPPKPKDTLMI	P51884	307	PLSYSKIKHLRLDGN	Q96PP9	170	LAELIRAKSCPRPDE
P01860	218	GVEVHNAKTKPREEQ	P51884	69	PMVPPGIKYLYLRNN	Q96PP9	203	RDFTLELKLDGNPIT
P01860	256	YKCKVSNKALPAPIE	P51957	584	VDVTSTQKEAENQRR	Q96PQ0	216	ICPTNKRKVILVSSS
P01860	264	ALPAPIEKTISKTKG	P52179	959	LGWKQPDKIGGAEIT	Q96PQ7	262	EARQEEIKMEGVEPN
P01861	101	VDKRVESKYGPPCPS	P52209	377	SVFLGKIKDAFDRNP	Q96PQ7	515	GVAVLDDKLYVVGGR
P01861	128	FLFPPKPKDTLMISR	P52306	409	GVTEAVLKFLKSEMP	Q96PX1	92	RSLVNIRKDTLRLVK
P01861	202	NGKEYKCKVSNKGLP	P52306	412	EAVLKFLKSEMPPVQ	Q96PX1	99	KDTLRLVKCAEEVKS
P01861	206	YKCKVSNKGLPSSIE	P52565	138	HTYRKGVKIDKTDYM	Q96PX9	1036	ILFSKTQKVEGSHDV
P01861	214	GLPSSIEKTISKAKG	P52565	167	TPVEEAPKGMLARGS	Q96PX9	1047	SHDVYLYKQSFKTAE
P01861	240	PSQEEMTKNQVSLTC	P52566	124	RDIVSGLKYVQHTYR	Q96PX9	1051	YLYKQSFKTAEIGMT
P01861	93	DHKPSNTKVDKRVES	P52566	164	TPVEEAPKGMLARGT	Q96PZ7	474	LTVGDAGKVGDTRSV
P01871	112	VIAELPPKVSVFVPP	P52701	854	ETTYSKKKIIDFLSA	Q96Q04	987	RSPEAGEKVLVNGGL
P01871	131	FGNPRKSKLICQATG	P52742	585	YGCNECGKSFSHSSS	Q96Q04	998	NGGLTPPKSEDKVSE
P01871	153	VSWLREGKQVGSGVT	P52744	164	KKIHTGEKPYKCEVC	Q96Q06	269	TGAMNVAKGTIQTGV
P01871	169	DQVQAEAKESGPTTY	P52756	800	LSGADSYKDAVRKAM	Q96Q06	302	TGAMNVAKGTIQTGV
P01871	177	ESGPTTYKVTSTLTI	P52789	146	DKLQIKDKKLPLGFT	Q96Q06	881	KSVLTGTKDAVSTGL
P01871	238	FASIFLTKSTKLTCL	P52789	147	KLQIKDKKLPLGFTF	Q96Q06	907	QTGVDTSKTVLTGTK
P01871	315	TDLPSPLKQTISRPK	P52799	163	RAMKILMKVGQDASS	Q96Q89	824	VEVPKDSKSKICSER
P01871	322	KQTISRPKGVALHRP	P52824	909	IISAAGPKVHMLRKA	Q96QA5	123	QTLSVAPKALETVQE
P01871	376	GQPLSPEKYVTSAPM	P52907	230	QTAKEFIKIIENAEN	Q96QB1	689	SKHKAPSKLGLIISG
P01871	64	PSVLRGGKYAATSQV	P52948	595	NGAFMPKKSIKKLVL	Q96QB1	707	QEGMDEEKLKQLNCV
P01871	76	SQVLLPSKDVMQGTD	P53350	475	HPNSLMKKITLLKYF	Q96QD5	106	CQALMDYKVFEAVPT
P01871	89	TDEHVVCKVQHPNGN	P53350	492	YMSEHLLKAGANITP	Q96QE3	709	KAKQLIEKAKALHIS
P01871	99	HPNGNKEKNVPLPVI	P53367	118	VILADEIKNPAMEKL	Q96QE3	711	KQLIEKAKALHISRS
P01876	168	TWTPSSGKSAVQGPP	P53396	177	LVHAPEDKKEILASF	Q96QE3	805	FLVRKAQKAADPVPS
P01876	200	AEPWNHGKTFTCTAA	P53618	128	LRFLCKLKEAELLEP	Q96QE3	823	SSQDTSEKSQDCDVQ
P01876	212	TAAYPESKTPLTATL	P53634	462	VAATPIPKL******	Q96QF0	287	KKGHTRNKSTSSAMS
P01876	258	LARGFSPKDVLVRWL	P53675	603	ADAILGNKMFTHYDR	Q96QF0	308	SVIQPIVKDCKEADL
P01876	275	SQELPREKYLTWASR	P53675	764	ERVKNFLKEAKLTDQ	Q96QP1	1140	YILGEFVKLSNNTKV
P01876	307	VAAEDWKKGDTFSCM	P53990	134	KYSKEYGKLCRTNQI	Q96QP1	65	KWPFVPEKWQYKQAV
P01876	327	LPLAFTQKTIDRLAG	P54108	24	SFPANEDKDPAFTAL	Q96QS6	294	PSISHLAKDFIDKLL
P01877	155	TWTPSSGKSAVQGPP	P54108	45	VQREIVNKHNELRRA	Q96QU8	672	ISTKVQDKLLLSACH
P02008	100	RVDPVNFKLLSHCLL	P54132	418	LTEVDFNKSDASLLG	Q96QU8	701	ISIPAVQKVFNRITD
P02008	62	QLRAHGSKVVAAVGD	P54274	258	KSSTFLMKAAAKVVE	Q96QZ0	183	NELEKARKERYFEFP
P02042	121	VLARNFGKEFTPQMQ	P54274	267	AAKVVESKRTRTITS	Q96R06	668	RSRQLTEKLTVKSQQ
P02042	133	QMQAAYQKVVAGVAN	P54277	378	NKVESSGKNYSNVDT	Q96R06	779	QKEEMALKHMQAELQ
P02042	145	VANALAHKYH*****	P54277	51	LENYGFDKIEVRDNG	Q96RI0	367	PGDTVASKASAEGGS
P02042	18	AVNALWGKVNVDAVG	P54277	72	DAPVMAMKYYTSKIN	Q96RI1	220	TEIQCKSKRLRKNVK
P02042	60	DAVMGNPKVKAHGKK	P54652	160	DSQRQATKDAGTITG	Q96RL6	235	CHVDFSRKGVSAQRT
P02042	66	PKVKAHGKKVLGAFS	P54707	516	EMDDPHGKRFLMVMK	Q96RL7	2228	TGRMLQYKADGIHRK
P02042	67	KVKAHGKKVLGAFSD	P54707	523	KRFLMVMKGAPERIL	Q96RL7	2996	GGAAGFFKGVGKGLV
P02042	9	VHLTPEEKTAVNALW	P54725	29	DETVKVLKEKIEAEK	Q96RL7	3000	GFFKGVGKGLVGAVA
P02144	148	KDMASNYKELGFQG*	P54750	137	FVERMYRKTYHMVGL	Q96RL7	3147	FHAREFGKIINFKTP
P02452	442	EPGAPGSKGDTGAKG	P54762	124	TDSVIATKKSAFWSE	Q96RL7	58	LDVPFKVKVGHIGNL
P02452	448	SKGDTGAKGEPGPVG	P54762	136	WSEAPYLKVDTIAAD	Q96RR4	314	KIIHRDIKPSNLLVG
P02461	1391	GNVKKALKLMGSNEG	P54802	465	MAELGWRKDPVPDLA	Q96RU2	784	GVILAIAKARQTFDR
P02461	1401	GSNEGEFKAEGNSKF	P55061	15	INFDALLKFSHITPS	Q96RV3	1383	ETIASPKKLNTELGA
P02461	610	GPQGPPGKNGETGPQ	P55072	529	CGKTLLAKAIANECQ	Q96S59	405	LEELASIKNRQRIQK
P02462	1319	VPGFQGPKGLPGLQG	P55081	357	DEDEEVYKRDFSAPT	Q96S59	412	KNRQRIQKLVLAGRM
P02462	1328	LPGLQGIKGDQGDQG	P55103	54	AKRSILDKLHLTQRP	Q96S86	99	SENGAPEKDVLVAIG
P02462	1496	TAGSCLRKFSTMPFL	P55160	365	EPGLLGPKALFAFMA	Q96S94	439	APRSAPYKGSEIRGS
P02538	421	QRGEMALKDAKNKLE	P55196	1337	TPASTLTKSGPGRWK	Q96SB3	112	VDHSALLKLGTSVSE
P02549	104	LEAEVQTKSRLMSEL	P55211	410	CFNFLRKKLFFKTS*	Q96SL4	29	EQDFYDFKAVNIRGK
P02549	1102	LEWIQEKKAENTGVE	P55291	114	NAMLDREKTDRFRLR	Q96ST8	274	AMKELQLKLKGMEKE
P02549	1238	DLVPLGDKVTILGET	P55317	270	QKRFKCEKQPGAGGG	Q96T21	140	CPLPQEMKALFKKKT
P02549	1290	ESLNEAQKFYLFLSK	P55773	25	GSQARVTKDAETEFM	Q96T68	89	DPMPVTQKEQENKSN
P02549	130	HSAHEETKAHIEELR	P55795	68	LESEEEVKLALKKDR	Q96T68	94	TQKEQENKSNAFPST
P02549	1374	EKKLQAVKLERDDLE	P55884	213	VIHKIFSKFGKITND	Q96TC7	191	DNERDSDKESEDGED
P02549	1468	IADEHYAKEEIATRL	P55884	216	KIFSKFGKITNDFYP	Q99102	429	TISAITSKVSTIWWS
P02549	1486	LDRWKALKAQLIDER	P56192	431	LINAVELKKPQCKVC	Q99259	242	EIVGWSSKDGDGIFS
P02549	1503	LGDYANLKQFYRDLE	P56381	37	EFKANAEKTSGSNVK	Q99442	303	DEKSETKKQQKSDSE
P02549	1579	DGNEEAMKEQLEQLK	P56556	83	FQLDITVKMGRDKVR	Q99442	317	EEKSDSEKKEDEEGK
P02549	1586	KEQLEQLKEHWDHLL	P57076	140	CVTMEMVKDALDQLR	Q99457	235	PEVKAEEKADSKDCM
P02549	159	DQLLRALKFQQYVQE	P57087	170	APEYTWFKDGIRLLE	Q99459	466	YSDPSYVKQMERESR
P02549	1648	SAGNLLKKHQLLERE	P57087	275	SKETSFQKSNSSSKA	Q99466	117	TGERCQAKLEDPCPP
P02549	1708	LAAAHHEKLKEAYAL	P58107	1810	PYFTEDRKRELIQEY	Q99497	41	TVAGLAGKDPVQCSR
P02549	1732	EESWIEEKLIRVSSQ	P58107	1846	ETQNQGIKVAAIRGE	Q99518	354	NNMVSLYKYIFPAHL
P02549	1803	QFVEHWEKLKELAKA	P58215	389	SLWKCPHKNITAEDC	Q99549	350	ENRKLENKNAFLEKK
P02549	1902	QNKEISSKIEALNEK	P58397	1058	PSPTTASKEGDLGGK	Q99549	436	EKGRKEPKGLKTLKE
P02549	1947	VEAWIADKETSLKTN	P58397	1556	CQTLKAMKKCSVPTV	Q99551	108	ITNEQDLKMFLLSKG
P02549	1992	LPEITDLKDKLISAQ	P58418	35	LGTPLWIKATVLCKT	Q99551	114	LKMFLLSKGASKEVI
P02549	1994	EITDLKDKLISAQHN	P59044	119	LLSVSEYKKKYREHV	Q99571	69	SSVTTKVKGVAVTNT
P02549	2040	EKQLPLQKAEDLFVE	P59044	413	RDLSRTSKTTTSVYL	Q99593	115	PADDHRYKFADNKWS
P02549	2051	LFVEFAHKASALNNW	P59047	165	MTDQGPSKEKVPGIS	Q99593	99	TGLNPKTKYILLMDI
P02549	2061	ALNNWCEKMEENLSE	P59047	543	VEGVWNRKSVFDGDD	Q99608	112	LMWYVLVKDQKKMII
P02549	210	FQVELVAKEGRVVEV	P59047	664	VPLGVKQKLLHWVSL	Q99608	115	YVLVKDQKKMIIWFP
P02549	2132	EVLERTWKHLSDIIE	P59047	811	KLRHPTCKIQTLMFR	Q99608	116	VLVKDQKKMIIWFPD
P02549	2147	EREQELQKEEARQVK	P59910	176	DGYSSTIKDKILTID	Q99615	306	NRGTVNSKLRKLDDA
P02549	2200	ESQLEANKRKQKEIQ	P59910	178	YSSTIKDKILTIDVK	Q99698	478	ALINSVMKIMSTVKK
P02549	2202	QLEANKRKQKEIQAM	P59910	185	KILTIDVKPGWRQGT	Q99715	521	GGSTNTGKAMTYVRE
P02549	2263	LEQQIQAKDIKGVSE	P60174	106	VAAQNCYKVTNGAFT	Q99728	160	KVRYVVSKASVQTQP
P02549	2331	DAVDPGRKGYVSLED	P60174	186	KVVFEQTKVIADNVK	Q99741	484	IKEVTLGKLYEAYSK
P02549	2352	DKESENIKSSDEIEN	P60174	225	QAQEVHEKLRGWLKS	Q99741	491	KLYEAYSKVCRKQQV
P02549	2373	EGKSYITKEDMKQAL	P60709	113	TEAPLNPKANREKMT	Q99742	360	SHVDLLDKGQVMTGY
P02549	238	DLPLIQSKQNEVNAA	P60709	191	DLTDYLMKILTERGY	Q99758	640	LKGLSRQKCPEEVKQ
P02549	281	TEAIQWIKEKEPVLT	P60709	215	IVRDIKEKLCYVALD	Q99758	657	HIIGLEDKWNSRSRF
P02549	283	AIQWIKEKEPVLTSE	P60709	291	KCDVDIRKDLYANTV	Q99767	668	LIKRPDLKYQLGFSV
P02549	319	NLAVMSDKVKELCAK	P60709	315	GIADRMQKEITALAP	Q99784	124	RDLQYVEKMENQMKG
P02549	326	KVKELCAKAEKLTLS	P60709	326	ALAPSTMKIKIIAPP	Q99784	130	EKMENQMKGLESKFK
P02549	345	APQIQEMKEDLVSSW	P60709	50	VMVGMGQKDSYVGDE	Q99784	137	KGLESKFKQVEESHK
P02549	389	LSGWMNEKTAAINAD	P60709	61	VGDEAQSKRGILTLK	Q99784	157	QFKAIKAKMDELRPL
P02549	416	LDRHQQHKHEIDSYD	P60709	68	KRGILTLKYPIEHGI	Q99832	135	ATQLAVNKIKEIAVT
P02549	450	ASDEVREKMEILDNN	P60709	84	TNWDDMEKIWHHTFY	Q99959	516	LSSNDKLKNLMITEA
P02549	48	RVAERGQKLEDSYHL	P60842	309	MHGDMDQKERDVIMR	Q99961	20	ASQLVSEKVGGAEGT
P02549	541	TVDKTATKLIGDDHY	P60900	171	KATAAGVKQTESTSF	Q99961	28	VGGAEGTKLDDDFKE
P02549	554	HYDSENIKAIRDGLL	P61011	438	VKKMGGIKGLFKGGD	Q99961	34	TKLDDDFKEMEKKVD
P02549	579	ATRRRLLKESLLLQK	P61011	442	GGIKGLFKGGDMSKN	Q99963	136	DSLDINVKQTFIDPL
P02549	586	KESLLLQKLYEDSDD	P61088	74	PKVRFMTKIYHPNVD	Q99973	2573	ELLVTASKDRDVKLW
P02549	59	SYHLQVFKRDADDLG	P61129	1027	ALPPYAPKLSSSAGL	Q99973	2578	ASKDRDVKLWERPSM
P02549	595	YEDSDDLKNWINKKK	P61160	53	KVGNIEIKDLMVGDE	Q99973	746	GILKTAIKLQAQVQE
P02549	634	EKELAVNKTQLENIQ	P61201	48	ALKEDDPKAALSSFQ	Q99996	1943	IDGYADEKTLFERQI
P02549	642	TQLENIQKTGQEMIE	P61201	64	VLELEGEKGEWGFKA	Q99996	369	DKLTTADKLLGELQE
P02549	67	RDADDLGKWIMEKVN	P61224	128	EDERVVGKEQGQNLA	Q99996	476	MAQMEEMKTRHKGEM
P02549	72	LGKWIMEKVNILTDK	P61224	5	***MREYKLVVLGSG	Q99996	569	TIAEQESKLNEAHKS
P02549	728	EVQNRLRKHGLLESA	P61296	172	EAFKAEIKKTDVKEE	Q99996	575	SKLNEAHKSLSTVED
P02549	779	VCRFEALKEPLATRK	P61296	173	AFKAEIKKTDVKEEK	Q99996	964	LEVTKREKLELSQRL
P02549	858	EITERGNKMVEEGHF	P61366	79	ENDVIETKKKRSFSG	Q99996	979	SDLSEQLKQKHGEIS
P02549	918	AETWIREKEPIVDNT	P61366	80	NDVIETKKKRSFSGF	Q99999	82	RRNIVFLKTHKTASS
P02549	93	NIQGKYQKHQSLEAE	P61565	53	PPTWAQLKKLTQLAT	Q9BPW5	56	LVVRFLTKRFIGDYE
P02549	940	AAGALLKKHEAFLLD	P61576	38	VTSEEEMKLPSTKKA	Q9BPZ3	108	SLEDLVVKSNLNPNA
P02585	53	MLGQTPTKEELDAII	P61601	63	FPYGDASKFAEHVFR	Q9BQ04	73	NVEASKNKSKASTKL
P02647	101	EFWDNLEKETEGLRQ	P61758	59	KLDEQYQKYKFMELN	Q9BQ51	27	LFTVTVPKELYIIEH
P02647	112	GLRQEMSKDLEEVKA	P61769	111	HVTLSQPKIVKWDRD	Q9BQ61	137	GIVAKKQKTEDEVLT
P02647	118	SKDLEEVKAKVQPYL	P61769	114	LSQPKIVKWDRDM**	Q9BQE4	133	KSYKGNAKKPQEEDS
P02647	120	DLEEVKAKVQPYLDD	P61769	26	EAIQRTPKIQVYSRH	Q9BQE4	134	SYKGNAKKPQEEDSP
P02647	130	PYLDDFQKKWQEEME	P61769	39	RHPAENGKSNFLNCY	Q9BQE4	150	PSTSSVLKRKSDRKP
P02647	131	YLDDFQKKWQEEMEL	P61769	61	DIEVDLLKNGERIEK	Q9BQE5	54	DEADELRKALNKLAS
P02647	142	EMELYRQKVEPLRAE	P61769	68	KNGERIEKVEHSDLS	Q9BQE5	58	ELRKALNKLASHMVM
P02647	157	LQEGARQKLHELQEK	P61769	78	HSDLSFSKDWSFYLL	Q9BQK8	469	VSYQDLTKNPGLLDD
P02647	164	KLHELQEKLSPLGEE	P61952	61	VKGIPEDKNPFKEKG	Q9BQK8	514	LPKSTMDKLEREKMP
P02647	206	AARLEALKENGGARL	P61981	28	DDMAAAMKNVTELNE	Q9BQK8	635	KATIYLWKWDDKVVI
P02647	219	RLAEYHAKATEHLST	P62158	95	EAFRVFDKDGNGYIS	Q9BQL6	126	KAVSDICKILNIRRS
P02647	230	HLSTLSEKAKPALED	P62258	118	AANTGESKVFYYKMK	Q9BQW3	169	CSRCCDRKSCGNRNE
P02647	232	STLSEKAKPALEDLR	P62258	142	FATGNDRKEAAENSL	Q9BRC7	26	QEGMPMRKVRSKSWK
P02647	250	LPVLESFKVSFLSAL	P62328	19	KFDKSKLKKTETQEK	Q9BRJ2	264	GSWRMHTKIVPPWAP
P02647	262	SALEEYTKKLNTQ**	P62328	20	FDKSKLKKTETQEKN	Q9BRX5	31	DILMSHEKLPVRTET
P02647	263	ALEEYTKKLNTQ***	P62328	26	KKTETQEKNPLPSKE	Q9BS26	336	MYVFGDFKDVLIPGK
P02647	36	QSPWDRVKDLATVYV	P62328	32	EKNPLPSKETIEQEK	Q9BSG1	405	FECTVCGKVFSSKSS
P02647	47	TVYVDVLKDSGRDYV	P62328	39	KETIEQEKQAGES**	Q9BSJ2	746	LTNPELLKVFSKLMS
P02647	64	FEGSALGKQLNLKLL	P62333	206	VSSSIVDKYIGESAR	Q9BSJ2	750	ELLKVFSKLMSVCVM
P02647	69	LGKQLNLKLLDNWDS	P62491	179	IYRIVSQKQMSDRRE	Q9BSK4	452	VLQDRAAKGSLGTQI
P02647	83	SVTSTFSKLREQLGP	P62633	136	QKDCTKVKCYRCGET	Q9BT81	81	ELSKMLGKSWKALTL
P02649	113	ETRARLSKELQAAQA	P62684	498	AIKPLKGKVPAGSDV	Q9BTC0	1309	STASSASKTASPLEH
P02649	19	FLAGCQAKVEQAVET	P62736	70	KRGILTLKYPIEHGI	Q9BTT4	40	SQAGLNQKLNFIVTG
P02649	251	RDRLDEVKEQVAEVR	P62736	86	TNWDDMEKIWHHSFY	Q9BTW9	913	VAQQASEKIDRFRAH
P02649	260	QVAEVRAKLEEQAQQ	P62760	18	EVMEDLVKSTEFNEH	Q9BU19	469	SVAAHRSKSHPALLL
P02649	87	ALMDETMKELKAYKS	P62760	7	*MGKQNSKLAPEVME	Q9BU64	102	EEKLENVKAILQAYH
P02649	93	MKELKAYKSELEEQL	P62820	198	KIQSTPVKQSGGGCC	Q9BU76	138	VAMSREDKEAAKLGL
P02652	26	ALVRRQAKEPCVESL	P62826	60	HTNRGPIKFNVWDTA	Q9BUY7	57	LFGYKPSKIEVDSVM
P02652	46	QTVTDYGKDLMEKVK	P62917	119	IVCCLEEKPGDRGKL	Q9BV36	443	HQTNRQEKSPQDPGD
P02652	51	YGKDLMEKVKSPELQ	P62917	93	QFVYCGKKAQLNIGN	Q9BV73	307	EDYEKMIKALRETVE
P02652	53	KDLMEKVKSPELQAE	P62937	28	SFELFADKVPKTAEN	Q9BV73	961	DMKVQKLKEQETTGI
P02652	62	PELQAEAKSYFEKSK	P62937	31	LFADKVPKTAENFRA	Q9BV86	21	SKAKTYWKQIPPTVD
P02652	67	EAKSYFEKSKEQLTP	P62942	48	RDRNKPFKFMLGKQE	Q9BVI0	818	TLNGAVEKPRPLALP
P02652	69	KSYFEKSKEQLTPLI	P63010	36	KRKEAVKKVIAAMTV	Q9BVJ6	240	LQSYYEAKARREKKI
P02652	77	EQLTPLIKKAGTELV	P63096	279	DLFEEKIKKSPLTIC	Q9BVS5	233	GTAITFPKDINMILS
P02652	78	QLTPLIKKAGTELVN	P63096	280	LFEEKIKKSPLTICY	Q9BVV6	441	TNSMVQPKESLSMLK
P02654	36	DVSSALDKLKEFGNT	P63104	212	TLSEESYKDSTLIMQ	Q9BVV6	530	KTVDEWIKTISAEIQ
P02654	38	SSALDKLKEFGNTLE	P63104	27	DDMAACMKSVTEQGA	Q9BW19	609	VIMALSNKESHVPYR
P02654	47	FGNTLEDKARELISR	P63104	68	VVSSIEQKTEGAEKK	Q9BW27	218	EARQMLSKEADASPA
P02654	56	RELISRIKQSELSAK	P63128	907	KRGYIPGKGLGKNED	Q9BW83	7	*MVKLAAKCILAGDP
P02654	63	KQSELSAKMREWFSE	P67812	15	DDVRRMNKRQLYYQV	Q9BWD1	233	SNIEAMSKLKPYFLT
P02654	74	WFSETFQKVKEKLKI	P67936	132	KYEEVARKLVILEGE	Q9BWD1	265	AAAVVLMKKSEADKR
P02655	61	AAQNLYEKTYLPAVD	P67936	169	KNVTNNLKSLEAASE	Q9BWP8	140	TSELKFIKNAVAGVR
P02655	70	YLPAVDEKLRDLYSK	P67936	223	TIDDLEEKLAQAKEE	Q9BWV3	35	GQIPRLSKVNLFTLL
P02655	77	KLRDLYSKSTAAMST	P67936	44	GERERREKAEGDVAA	Q9BWW9	5	***MPCGKQGNLQVP
P02655	98	DQVLSVLKGEE****	P68032	86	TNWDDMEKIWHHTFY	Q9BX26	1409	QSQDSRIKKLDKFQF
P02656	37	SFMQGYMKHATKTAK	P68036	73	PKITFKTKIYHPNID	Q9BX26	1410	SQDSRIKKLDKFQFI
P02656	41	GYMKHATKTAKDALS	P68104	129	EFEAGISKNGQTREH	Q9BX26	1413	SRIKKLDKFQFIIIE
P02656	44	KHATKTAKDALSSVQ	P68133	293	KCDIDIRKDLYANNV	Q9BX26	349	SIEVRESKKLLTIIL
P02656	71	TDGFSSLKDYWSTVK	P68400	68	NNEKVVVKILKPVKK	Q9BX82	241	YACEECGKAFKQRQH
P02671	100	FEYQKNNKDSHSLTT	P68871	121	VLAHHFGKEFTPPVQ	Q9BX84	1188	TEMYFQLKEMNEKVS
P02671	144	RIEVLKRKVIEKVQH	P68871	133	PVQAAYQKVVAGVAN	Q9BX84	1965	AIRNFIAKHHCNSCC
P02671	148	LKRKVIEKVQHIQLL	P68871	145	VANALAHKYH*****	Q9BX84	901	EPGKFTQKVKVWISE
P02671	157	QHIQLLQKNVRAQLV	P68871	18	AVTALWGKVNVDEVG	Q9BXF3	332	RIEKQKRKEEEEERQ
P02671	167	RAQLVDMKRLEVDID	P68871	60	DAVMGNPKVKAHGKK	Q9BXF3	366	RELEEKVKAVEGMCS
P02671	176	LEVDIDIKIRSCRGS	P68871	62	VMGNPKVKAHGKKVL	Q9BXF9	462	LEYDLAVKANSLYID
P02671	195	LAREVDLKDYEDQQK	P68871	67	KVKAHGKKVLGAFSD	Q9BXI2	204	FFASGRSKDELGPVH
P02671	202	KDYEDQQKQLEQVIA	P68871	83	LAHLDNLKGTFATLS	Q9BXI6	477	PPKDSAPKDSAPQDL
P02671	210	QLEQVIAKDLLPSRD	P68871	9	VHLTPEEKSAVTALW	Q9BXM0	808	MPKMTMPKLGRAESP
P02671	225	RQHLPLIKMKPVPDL	P68871	96	LSELHCDKLHVDPEN	Q9BXU7	795	LLALGSNKNPRNKDI
P02671	227	HLPLIKMKPVPDLVP	P69849	762	YWARSGEKITVTPSS	Q9BXW9	1152	STASAQNKEKIASLA
P02671	238	DLVPGNFKSQLQKVP	P69849	770	ITVTPSSKELLFYPP	Q9BXW9	1154	ASAQNKEKIASLARQ
P02671	249	QKVPPEWKALTDMPQ	P69849	798	KLIEIHGKAGLFLEG	Q9BXW9	571	SSTVFKYKLIGIIGA
P02671	432	RREYHTEKLVTSKGD	P69891	121	VLAIHFGKEFTPEVQ	Q9BXW9	681	GDFPFPVKALYGLEE
P02671	437	TEKLVTSKGDKELRT	P69891	67	KVKAHGKKVLTSLGD	Q9BY11	178	MTREMNSKTEQSVTP
P02671	446	DKELRTGKEKVTSGS	P69891	9	GHFTEEDKATITSLW	Q9BY11	189	SVTPEQQKKLQDKVD
P02671	448	ELRTGKEKVTSGSTT	P69892	133	EVQASWQKMVTGVAS	Q9BY11	211	KTQEKYEKVLEDVGK
P02671	463	TTRRSCSKTVTKTVI	P69905	100	RVDPVNFKLLSHCLL	Q9BY32	19	FVTGNAKKLEEVVQI
P02671	467	SCSKTVTKTVIGPDG	P69905	12	PADKTNVKAAWGKVG	Q9BY32	56	PDEISIQKCQEAVRQ
P02671	476	VIGPDGHKEVTKEVV	P69905	128	AVHASLDKFLASVST	Q9BY66	1333	GSGNNISKVQGLLEN
P02671	527	FDTASTGKTFPGFFS	P69905	140	VSTVLTSKYR*****	Q9BY66	1354	PENMAPGKGSDLELL
P02671	558	SGIFTNTKESSSHHP	P69905	17	NVKAAWGKVGAHAGE	Q9BY66	235	EKHPELKKLQIYGPG
P02671	575	AEFPSRGKSSSYSKQ	P69905	41	FLSFPTTKTYFPHFD	Q9BY66	244	QIYGPGPKMMGLGLM
P02671	581	GKSSSYSKQFTSSTS	P69905	57	SHGSAQVKGHGKKVA	Q9BY66	946	GLLVMGAKIASSPSV
P02671	599	GDSTFESKSYKMADE	P69905	61	AQVKGHGKKVADALT	Q9BY76	339	DHDLRRDKNCAKSLS
P02671	602	TFESKSYKMADEAGS	P69905	62	QVKGHGKKVADALTN	Q9BY76	343	RRDKNCAKSLSGGWW
P02671	620	HEGTHSTKRGHAKSR	P69905	8	MVLSPADKTNVKAAW	Q9BY89	1698	TEEKSPRKEESDEEE
P02671	71	CPSGCRMKGLIDEVN	P69905	91	LSDLHAHKLRVDPVN	Q9BYC5	541	NHWDGYSKGVNRKLG
P02671	89	TNRINKLKNSLFEYQ	P78312	1157	KNKKNKKKKGDRVNN	Q9BYE7	223	ERGLEVPKPAVPQPV
P02671	97	NSLFEYQKNNKDSHS	P78312	1158	NKKNKKKKGDRVNNS	Q9BYE7	234	PQPVPSSKGRSKKVL
P02675	160	DLWQKRQKQVKDNEN	P78344	321	AFLDNGPKTINQIRQ	Q9BYE7	238	PSSKGRSKKVLESVF
P02675	163	QKRQKQVKDNENVVN	P78344	332	QIRQDAVKDLGVFIP	Q9BYG5	167	LYKYGTEKPLGFYIR
P02675	178	EYSSELEKHQLYIDE	P78363	932	WVPGVCVKNLVKIFE	Q9BYT8	664	MNPEVGMKYRNLILK
P02675	208	ILENLRSKIQKLESD	P78364	763	QLLKESEKPLQTGLP	Q9BYT8	671	KYRNLILKPGGSLDG
P02675	211	NLRSKIQKLESDVSA	P78417	152	EFRKEFTKLEEVLTN	Q9BYV6	319	VNLNREEKIIREIDF
P02675	239	NIPVVSGKECEEIIR	P78527	133	PALDLLIKLLQTFRS	Q9BYV9	421	PGLEALCKQEGELDR
P02675	247	ECEEIIRKGGETSEM	P78559	1427	TALEQKDKALEPKDK	Q9BYW2	1378	EISSNSIKDTLAVNE
P02675	264	IQPDSSVKPYRVYCD	P78559	1434	KALEPKDKDLEEKDK	Q9BYW2	1795	DGRESNQKLQEEIIK
P02675	295	GSVDFGRKWDPYKQG	P80108	195	DLLGIYEKLYGRKVI	Q9BZ29	100	ICSTVPAKAEEEAQS
P02675	300	GRKWDPYKQGFGNVA	P80108	559	SGPSLSDKEKLNVEA	Q9BZC7	1128	QTLSGGMKRKLSVAI
P02675	313	VATNTDGKNYCGLPG	P80108	764	RVYVYNGKETTLGDM	Q9BZF1	795	RQQKKVAKGYSSPEP
P02675	348	LIEMEDWKGDKVKAH	P80303	90	IKSGRLSKELDLVSH	Q9BZF1	816	GSEAQSVKPSTRRKK
P02675	351	MEDWKGDKVKAHYGG	P80404	284	IVKYRKKKKTVAGII	Q9BZF9	1034	KQENDKLKKEIFTLQ
P02675	353	DWKGDKVKAHYGGFT	P80404	285	VKYRKKKKTVAGIIV	Q9BZF9	1035	QENDKLKKEIFTLQK
P02675	367	TVQNEANKYQISVNK	P80404	311	ASDDFFRKLRDIARK	Q9BZF9	1197	KEEESQNKMEEVSKL
P02675	374	KYQISVNKYRGTAGN	P81133	351	LDQISASKPAFSYTS	Q9BZF9	1212	QSEVQNTKQALKKLE
P02675	426	DPRKQCSKEDGGGWW	P81133	369	PTMTDNRKGAKSRLS	Q9BZI1	309	AAPRGGRKTPQGSRT
P02675	458	QYTWDMAKHGTDDGV	P81877	21	SDSQAREKLALYVYE	Q9BZJ6	388	ACLDMMPKSFKFLPQ
P02675	471	GVVWMNWKGSWYSMR	P82094	1040	EKVKEIPKLRTQLRD	Q9BZK7	125	ASQQGSAKNGENTAN
P02675	52	GHRPLDKKREEAPSL	P82251	464	YKFGWAQKISKPITM	Q9BZL6	643	EMILSSEKGRLPERL
P02679	101	YNPDESSKPNMIDAA	P82979	151	MVNLDKLKERAQRFG	Q9BZM4	175	RMKEKWEKDSGLTTF
P02679	111	MIDAATLKSRKMLEE	P82987	213	RQLGSNAKEDNCGVC	Q9BZM4	184	SGLTTFFKMVSMRDC
P02679	114	AATLKSRKMLEEIMK	P82987	888	SKIKSEMKTKLGEQG	Q9BZQ2	660	NNHIYSNKGYGVSIL
P02679	121	KMLEEIMKYEASILT	P82987	890	IKSEMKTKLGEQGPQ	Q9BZR9	260	VLDKAQAKFCSENAA
P02679	146	IYNSNNQKIVNLKEK	P83105	438	VIVNINGKPITTTTD	Q9BZR9	280	GERMQEAKKLLGSLQ
P02679	153	KIVNLKEKVAQLEAQ	P83916	9	GKKQNKKKVEEVLEE	Q9BZV3	63	LSLATKKKQPLDRRE
P02679	166	AQCQEPCKDTVQIHD	P98088	504	AQTVVVIKASGEVFL	Q9BZZ2	1686	SVEMAFQKETTQLID
P02679	177	QIHDITGKDCQDIAN	P98161	2685	LVCRSCLKQTLHKLE	Q9C035	84	VEKLREVKLSPEGQK
P02679	188	DIANKGAKQSGLYFI	P98170	396	IKKIMEEKIQISGSN	Q9C075	387	EGTREESKSSMKVSA
P02679	196	QSGLYFIKPLKANQQ	P98175	464	HGYLKGTKGPGITGT	Q9C099	786	SLAQNRGKLEAQIES
P02679	222	NGWTVFQKRLDGSVD	Q00005	305	TRDYLTVKVWDLNME	Q9C0A1	1309	GEVGTEKKGPDTSGF
P02679	231	LDGSVDFKKNWIQYK	Q00013	180	KDNLIPCKEAGLKFA	Q9C0D2	1726	EVLHYSQKAQEKLLV
P02679	232	DGSVDFKKNWIQYKE	Q00013	185	PCKEAGLKFATGDII	Q9C0D4	581	DNQTEEHKAVSTVGQ
P02679	238	KKNWIQYKEGFGHLS	Q00013	197	DIIQIINKDDSNWWQ	Q9C0D4	594	GQISSQHKSEYLHIN
P02679	292	TADYAMFKVGPEADK	Q00013	283	RLPAFKRKTLVLIGA	Q9C0D5	1553	AVRNGSMKVQISSQN
P02679	299	KVGPEADKYRLTYAY	Q00013	299	GVGRSHIKNALLSQN	Q9C0D7	78	VNVGKDEKEASEENA
P02679	328	FGDDPSDKFFTSHNG	Q00013	309	LLSQNPEKFVYPVPY	Q9C0F0	1629	VTHSGSSKQKEYLEQ
P02679	399	GIIWATWKTRWYSMK	Q00013	374	HQIHKQNKIAILDIE	Q9C0F0	1631	HSGSSKQKEYLEQSC
P02679	407	TRWYSMKKTTMKIIP	Q00013	445	GVDETLKKLQEAFDQ	Q9C0F1	266	DCLEQKMKGKVMVDE
P02679	411	SMKKTTMKIIPFNRL	Q00059	76	KAQNPDAKTTELIRR	Q9C0G0	441	FTLKGQAKKRFNLLG
P02679	84	ENKTSEVKQLIKAIQ	Q00341	159	SATVAIPKEHHRFVI	Q9C0G6	482	PSADVIQKWITEEKP
P02679	88	SEVKQLIKAIQLTYN	Q00526	200	FAEMVTRKALFPGDS	Q9C0G6	488	QKWITEEKPEVPDKK
P02730	116	ELRRVFTKGTVLLDL	Q00535	104	DLDPEIVKSFLFQLL	Q9C0I3	441	GYEANPAKVLASSLS
P02730	160	LLRALLLKHSHAGEL	Q00587	117	PAISPIIKNAISLPQ	Q9C0I3	79	HKKGSEPKQEPTNQN
P02730	174	LEALGGVKPAVLTRS	Q00610	1215	EKMYDAAKLLYNNVS	Q9C0K3	115	DIVKEFAKYDVDPQK
P02730	542	ETFSKLIKIFQDHPL	Q00610	881	ATHNALAKIYIDSNN	Q9C0K3	122	KYDVDPQKWIKQYTG
P02730	592	AMMLRKFKNSSYFPG	Q00653	252	EVYLLCDKVQKDDIE	Q9C0K3	136	GINAINQKKFVIDVG
P02730	600	NSSYFPGKLRRVIGD	Q00722	1132	AEYEARMKGLEAEVK	Q9GZN1	224	YRDMDIAKLKGEENT
P02730	69	QELVMDEKNQELRWM	Q00722	168	SEGKIPVKNFFQMFP	Q9GZQ3	209	YSVALVLKEMADLEK
P02730	743	NALTVMGKASTPGAA	Q00796	78	EASGTVEKVGSSVKH	Q9GZQ3	216	KEMADLEKRCERRLQ
P02730	757	AAQIQEVKEQRISGL	Q00872	105	KWMDLASKAGKHLQL	Q9GZR1	68	DSETSKGKKLNRRSE
P02730	817	LLLFKPPKYHPDVPY	Q00872	96	KPTIKWFKGKWMDLA	Q9GZR1	69	SETSKGKKLNRRSEI
P02741	31	RKAFVFPKESDTSYV	Q00973	104	VRAIDLTKAFDPAEL	Q9GZR2	218	EAAKIARKQLGQSEG
P02741	41	DTSYVSLKAPLTKPL	Q00973	95	GLPLPFQKQVRAIDL	Q9GZR2	233	SVSLSLVKEQAFGGL
P02743	102	GRHKVTSKVIEKFPA	Q01082	102	LSGERLPKPTKGRMR	Q9GZR7	243	AAETGSGKTLAFAIP
P02743	149	YFVEAQPKIVLGQEQ	Q01082	976	SWIREKTKVIESTQD	Q9GZS1	357	AHRVVKRKSALGPGV
P02743	162	EQDSYGGKFDRSQSF	Q01167	245	NSQPENEKEASGGDS	Q9GZS1	371	VPHIINTKLLKHFTC
P02743	218	IRGYVIIKPLVWV**	Q01201	256	PYNAGSLKNHQEVDM	Q9GZS1	374	IINTKLLKHFTCLTY
P02743	26	AHTDLSGKVFVFPRE	Q01433	187	RAKQDFLKTDSDSDL	Q9GZT6	100	VSLDTIYKEMVTQAQ
P02745	223	WVEKDPKKGHIYQGS	Q01459	111	LKGDVSLKDIIDPAF	Q9GZV1	65	LRGDARQKLPMDLLV
P02746	163	RSGKFTCKVPGLYYF	Q01484	206	AARKDDTKSAALLLQ	Q9GZV1	77	LLVLEDEKHHGAQSA
P02747	115	PGEEGRYKQKFQSVF	Q01518	60	GPVAEYLKISKEIGG	Q9GZY8	52	QRMRVPEKLKVAPPN
P02747	117	EEGRYKQKFQSVFTV	Q01518	81	EMVHTGLKLERALLV	Q9GZZ1	47	LEVGELAKLAYFNDI
P02747	157	DYDTSTGKFTCKVPG	Q01546	307	NKVELQAKVDSLTDE	Q9GZZ1	70	VDHSQNQKRLYIMTL
P02747	188	LLYRSGVKVVTFCGH	Q01668	47	TSQPNSSKQTVLSWQ	Q9H0A0	950	EFQEKHKKEVGKLKS
P02747	198	TFCGHTSKTNQVNSG	Q01813	15	APKGSLRKFLEHLSG	Q9H0A3	98	ASKIIILKRTSLPTV
P02747	72	IPGIRGPKGQKGEPG	Q01954	539	LPKKKSRKSSMPIKI	Q9H0C3	84	LTGLIAGKFLFHQRL
P02748	207	ASLIYETKGEKNFRT	Q01954	545	RKSSMPIKIEKEAVE	Q9H0D6	495	PLGGIKRKAEDSDSE
P02748	210	IYETKGEKNFRTEHY	Q02094	321	LTPLFTTKLRIHDTC	Q9H0E3	864	DDEKSTAKSLLVKAE
P02748	225	EEQIEAFKSIIQEKT	Q02161	264	SLAHPQGKISKTYVH	Q9H0F7	85	NLWEHYYKEGQAIIF
P02748	231	FKSIIQEKTSNFNAA	Q02221	17	RGLASAAKGGHGGAG	Q9H0G5	178	CLDVTKQKDLSGFYR
P02748	292	SYSSKKEKMFLHVKG	Q02386	64	PQLEREEKLWMMKMA	Q9H0J9	528	LPFYFVQKIERVQNL
P02748	375	KRKGVELKDIKRCLG	Q02386	81	RDNSSGAKNLKEMET	Q9H0K1	569	MQALSSQKREVHNRS
P02748	435	LIRGGTRKYAFELKE	Q02388	2565	DPGDKGSKGEPGDKG	Q9H0K1	72	YREVQIMKMLDHPHI
P02748	441	RKYAFELKEKLLRGT	Q02388	2571	SKGEPGDKGSAGLPG	Q9H0K1	81	LDHPHIIKLYQVMET
P02748	483	IYNLVPVKMKNAHLK	Q02543	128	AHSIQIMKVEEIAAS	Q9H0K6	537	YVHAYTSKIWNEAVS
P02749	123	LNGADSAKCTEEGKW	Q02763	1100	NRMLEERKTYVNTTL	Q9H0N0	26	LGEQSVAKTSLITRF
P02749	129	AKCTEEGKWSPELPV	Q02790	108	EVCHITCKPEYAYGS	Q9H0V1	532	LIEWWREKNGSFCSR
P02749	204	LPECREVKCPFPSRP	Q02790	83	KFSFDLGKGEVIKAW	Q9H0V1	554	ENSTPWVKEVRKIND
P02749	221	GFVNYPAKPTLYYKD	Q02790	88	LGKGEVIKAWDIAIA	Q9H159	245	GTTSVLIKLSDVNDN
P02749	227	AKPTLYYKDKATFGC	Q02818	446	KEVDTSEKKLLERLP	Q9H173	151	MESSKEDKARQAEVK
P02749	25	IAGRTCPKPDDLPFS	Q02818	447	EVDTSEKKLLERLPE	Q9H173	158	KARQAEVKRLFRPIE
P02749	269	ASCKVPVKKATVVYQ	Q03001	1433	KRLEEEEKSLEEEKK	Q9H1B5	179	ALARASTKQCQQEIA
P02749	270	SCKVPVKKATVVYQG	Q03001	348	WIEFGRIKLLQGYHP	Q9H1B5	200	QAGSLMPKAVPRHCQ
P02749	285	ERVKIQEKFKNGMLH	Q03001	364	DIEKEWGKLIIAMLE	Q9H1D9	146	VKSVAASKKKVYMLY
P02749	287	VKIQEKFKNGMLHGD	Q03001	403	DSVICEDKLILAGNA	Q9H1D9	256	EMTIIAAKEGTVGSV
P02749	295	NGMLHGDKVSFFCKN	Q03001	4223	AMNEKVKKFMETTDP	Q9H1D9	268	GSVDGHMKLYRAVNP
P02749	301	DKVSFFCKNKEKKCS	Q03001	4339	SHGLPSDKALVLEKT	Q9H1H9	244	QSGNSGEKVSKVSLV
P02749	306	FCKNKEKKCSYTEDA	Q03001	6752	AQHKEFQKSLGAKHS	Q9H1J7	183	VDAREREKNFAKGSE
P02749	324	DGTIEVPKCFKEHSS	Q03001	6757	FQKSLGAKHSVYDTT	Q9H1J7	187	EREKNFAKGSEEQGR
P02749	327	IEVPKCFKEHSSLAF	Q03112	432	KENGKMFKDKVSPLQ	Q9H201	488	EALTQPSKEARACRT
P02749	336	HSSLAFWKTDASDVK	Q03164	2790	CHSVSRVKTQGQDSL	Q9H227	294	PEFTEEEKKMIKGTA
P02749	38	FSTVVPLKTFYEPGE	Q03164	2818	HTSTPSDKNLLDTYN	Q9H227	295	EFTEEEKKMIKGTAD
P02749	52	EEITYSCKPGYVSRG	Q03468	725	NASPVQVKTAYKCAC	Q9H228	102	LSGPLTLKLSPALWF
P02749	63	VSRGGMRKFICPLTG	Q03692	265	RGPEGIGKPGAAGAP	Q9H2C2	173	RPMTAKKKPNFILLL
P02749	78	LWPINTLKCTPRVCP	Q03692	300	PGPPGFGKPGLPGLK	Q9H2C2	181	PNFILLLKALLLSSY
P02750	223	RLHLEGNKLQVLGKD	Q03692	307	KPGLPGLKGERGPAG	Q9H2E6	862	IKEHLSSKSPNHGVN
P02750	229	NKLQVLGKDLLLPQP	Q03692	333	GPAGLPGKPGLTGPP	Q9H2G9	85	AVRILVPKAAITHDI
P02750	247	YLFLNGNKLARVAAG	Q03692	349	NMGPQGPKGIPGSHG	Q9H2G9	95	ITHDIPNKNTKVKSL
P02750	336	CAGPEAVKGQTLLAV	Q03701	160	GSTTPKVKKDKQNIF	Q9H2K8	817	NAYQSKIKMQTEAQH
P02750	345	QTLLAVAKSQ*****	Q03936	470	SVFSTLTKHKIIHTR	Q9H2M9	1248	ATPTPFGKDQDWPAL
P02751	100	AEETCFDKYTGNTYR	Q04656	1072	SNRISHHKILAIVGT	Q9H2P0	266	NVVVPRSKPLMLIAP
P02751	1050	NVGPSVSKYPLRNLQ	Q04656	849	VQRGDIIKVVPGGKF	Q9H2P0	274	PLMLIAPKPQDKKSM
P02751	1070	TVSLVAIKGNQESPK	Q04726	343	GLRSMPGKPPGMDPI	Q9H2P0	278	IAPKPQDKKSMGLPP
P02751	1116	PAPRIGFKLGVRPSQ	Q04727	231	DYSSESKKQKTEEKE	Q9H2S9	514	RGTPGPSKEVLRVVG
P02751	116	GDTYERPKDSMIWDC	Q04727	233	SSESKKQKTEEKEIA	Q9H2X6	494	GSDMLVEKADRREFI
P02751	1254	VYTVKDDKESVPISD	Q04741	204	SLSETQVKVWFQNRR	Q9H2X8	3	*****MMKRAAAAAV
P02751	1544	NYRTEIDKPSQMQVT	Q05193	393	REISYAIKNIHGIRT	Q9H2Z4	174	TGIADAAKSLGPLHA
P02751	1579	YRVTTTPKNGPGPTK	Q05823	631	EHSKSFDKWTTKINE	Q9H347	3	*****MAKGGEALPQ
P02751	1586	KNGPGPTKTKTAGPD	Q05BQ5	71	DAFYSKTKRFCSVSC	Q9H3H5	313	RLNIKTGKLEMSYSK
P02751	1796	EVSVYALKDTLTSRP	Q05BV3	1322	IRPMLGIKPHLQQKE	Q9H3H5	320	KLEMSYSKFKTKSLS
P02751	1837	ITISWRTKTETITGF	Q05C16	463	ILKLNLTKIQFENNF	Q9H3N1	107	LPTIYHCKDGEFRRY
P02751	1880	LQPGTDYKIYLYTLN	Q05D32	103	QISRVRRKSQVNGEA	Q9H3Q1	227	DVLSIMDKEEWDPEE
P02751	1936	RITGYIIKYEKPGSP	Q05D32	125	QHVKQNGKLEDNPSS	Q9H3R0	253	LISPSVLKKYGIPFD
P02751	1981	IALKNNQKSEPLIGR	Q05D32	275	TEEQLNRKPALPLKT	Q9H3T3	356	EGRFREQKSPESIWT
P02751	2230	RMSESGFKLLCQCLG	Q05D32	281	RKPALPLKTRSTPEF	Q9H422	465	MKSKEARKYIFNSLD
P02751	49	PVAVSQSKPGCYDNG	Q05DH4	1015	ALFPEFLKELAALAQ	Q9H479	116	DLHLYNQKLREKLKE
P02751	90	RGFNCESKPEAEETC	Q06033	117	VAKKQYEKAVSQGKT	Q9H488	328	QLFKGKVKVVSLKPE
P02751	987	VSHGRESKPLTAQQT	Q06033	123	EKAVSQGKTAGLVKA	Q9H489	110	EEGAIFKKEPAEEVE
P02753	105	TEDPAKFKMKYWGVA	Q06033	134	LVKASGRKLEKFTVS	Q9H4A6	52	DEQDDDDKGDSKETR
P02753	107	DPAKFKMKYWGVASF	Q06033	161	LTYEELLKRHKGKYE	Q9H4B8	253	GLTSFGEKVVEELNR
P02753	168	GLPPEAQKIVRQRQE	Q06033	164	EELLKRHKGKYEMYL	Q9H4G4	7	*MGKSASKQFHNEVL
P02753	35	RVKENFDKARFSGTW	Q06033	166	LLKRHKGKYEMYLKV	Q9H4H8	310	SHFQSSNKFDHLTNR
P02753	47	GTWYAMAKKDPEGLF	Q06033	172	GKYEMYLKVQPKQLV	Q9H4H8	318	FDHLTNRKPQSKELT
P02753	76	GQMSATAKGRVRLLN	Q06033	176	MYLKVQPKQLVKHFE	Q9H4I0	516	LCRNSDRKQAAAKFY
P02760	106	EKTDTDGKFLYHKSK	Q06033	221	TKSFSGKKGHVSFKP	Q9H4I3	335	RVSRLAVKAAFFGLL
P02760	111	DGKFLYHKSKWNITM	Q06033	227	KKGHVSFKPSLDQQR	Q9H4M3	115	DLSRDQRKEFPNDQV
P02760	149	HGPTITAKLYGRAPQ	Q06033	304	GRKLEQTKEALLRIL	Q9H4M3	123	EFPNDQVKKYFVTSY
P02760	227	LVTEVTKKEDSCQLG	Q06033	352	QEARTFVKSMEDKGM	Q9H4M3	124	FPNDQVKKYFVTSYY
P02760	309	LWAFDAVKGKCVLFP	Q06033	357	FVKSMEDKGMTNIND	Q9H501	705	EIEIERQKAEMALLM
P02760	311	AFDAVKGKCVLFPYG	Q06033	407	VGESRPEKIQENVRN	Q9H579	464	RLLRKLQKCHNEPAQ
P02760	326	GCQGNGNKFYSEKEC	Q06033	49	GIEVYSTKINSKVTS	Q9H5J4	95	ILMTKGLKQSVCDQG
P02760	331	GNKFYSEKECREYCG	Q06033	516	DEDMNSFKADVKGHG	Q9H6B4	182	EDERLPPKSRIDYNH
P02760	88	MTSTRWRKGVCEETS	Q06033	520	NSFKADVKGHGATND	Q9H6Q3	9	GSLPSRRKSLPSPSL
P02763	126	LLILRDTKTYMLAFD	Q06033	537	FTEEVDMKEMEKALQ	Q9H6R0	349	GAPKGYRKVIISTNI
P02763	148	GLSVYADKPETTKEQ	Q06033	541	VDMKEMEKALQERDY	Q9H6R3	141	DSPVTNTKATFTYKE
P02763	170	LDCLRIPKSDVVYTD	Q06033	605	LTSMVVTKPEDNEDE	Q9H6R3	530	FKHLYFEKFPGYYDT
P02763	179	DVVYTDWKKDKCEPL	Q06033	75	VNRADTAKEVSFDVE	Q9H6T0	319	DLALQRHKHHMGVRY
P02763	188	DKCEPLEKQHEKERK	Q06187	26	KTSPLNFKKRLFLLT	Q9H6U6	277	ISAAKTLKSGLTMVG
P02765	106	RCSVRQLKEHAVEGD	Q06187	36	LFLLTVHKLSYYEYD	Q9H6Z4	471	QIDKASEKSIRITAM
P02765	120	DCDFQLLKLDGKFSV	Q06190	522	DLESFSQKMETSLRE	Q9H741	82	CRNSIQGKHLITDEL
P02765	124	QLLKLDGKFSVVYAK	Q06203	403	NTISPIIKLLKESGA	Q9H741	96	LGYVCERKDLLVNGC
P02765	131	KFSVVYAKCDSSPDS	Q06278	34	LLPYLRKKLRLTGTK	Q9H7E2	424	GPSFAEAKENPLPQG
P02765	211	SGTDCVAKEATEAAK	Q06278	971	YKQEINAKNLIQCWR	Q9H7F0	405	YPKPTDFKLYRDAYL
P02765	218	KEATEAAKCNLLAEK	Q06323	13	VQPEAQAKVDVFRED	Q9H7U1	48	TSKNSNVKSYIKNNG
P02765	225	KCNLLAEKQYGFCKA	Q06546	428	CEQKKLAKMQLHGIA	Q9H7U1	52	SNVKSYIKNNGSDCP
P02766	146	TAVVTNPKE******	Q06547	381	EAEAYRQKLEAMTRL	Q9H814	305	SISEEQIKDIFYIEN
P02766	29	PTGTGESKCPLMVKV	Q06830	120	AQDYGVLKADEGISF	Q9H857	182	YGKGPSIKQFMDIFS
P02766	35	SKCPLMVKVLDAVRG	Q06830	16	GHPAPNFKATAVMPD	Q9H8X2	401	YRVAMTAKDCSIMIA
P02766	90	EFVEGIYKVEIDTKS	Q07002	162	TVFKGRSKLTENLVA	Q9H8Y8	65	LLKANVEKPVKMLIY
P02766	96	YKVEIDTKSYWKALG	Q07092	1382	QKGQAGEKGRAGMPG	Q9H8Y8	75	KMLIYSSKTLELRET
P02768	117	EMADCCAKQEPERNE	Q07283	106	KRARCDGKESLLQDR	Q9H902	139	AAVMAASKGQGALSE
P02768	130	NECFLQHKDDNPNLP	Q07817	87	VIPMAAVKQALREAG	Q9H939	43	KEFEDFLKERAAIEE
P02768	160	DNEETFLKKYLYEIA	Q07866	309	NLAVLYGKRGKYKEA	Q9H9A5	230	VRAYIQMKSLKACKR
P02768	161	NEETFLKKYLYEIAR	Q07954	2143	TGIGVQLKDIKVFNR	Q9H9A5	233	YIQMKSLKACKREIK
P02768	183	PELLFFAKRYKAAFT	Q07954	2210	YSERTILKSIHLSDE	Q9H9A5	256	SAPSLFLKSNFEYLR
P02768	186	LFFAKRYKAAFTECC	Q08188	643	GLLLGNLKIDVPTLG	Q9H9B4	223	GESANAAKQAITQVV
P02768	198	ECCQAADKAACLLPK	Q08188	652	DVPTLGPKEGSRVRF	Q9H9C1	472	AYRSKVDKGSAEEEK
P02768	205	KAACLLPKLDELRDE	Q08211	33	VGNKNRQKFMCEVQV	Q9H9C1	479	KGSAEEEKIDALLSS
P02768	214	DELRDEGKASSAKQR	Q08257	116	AADHTVYKLPEKLDF	Q9H9C1	492	SSSQIRWKN******
P02768	219	EGKASSAKQRLKCAS	Q08378	1109	RLEESNKKLALELEH	Q9H9E3	92	QLIEGDAKQLAGMIT
P02768	223	SSAKQRLKCASLQKF	Q08378	820	LREELAIKSGQVEHL	Q9H9G7	494	QGQPCFCKYAQGADS
P02768	229	LKCASLQKFGERAFK	Q08378	840	ALKKQMQKIKEQFLQ	Q9H9Q2	218	AEVTNIKKTLKATAS
P02768	236	KFGERAFKAWAVARL	Q08380	225	DITLSSVKCFHKLAS	Q9H9Q2	221	TNIKKTLKATASSSA
P02768	249	RLSQRFPKAEFAEVS	Q08380	229	SSVKCFHKLASAYGA	Q9HAC7	282	IVPYQAFKTKDGYIV
P02768	257	AEFAEVSKLVTDLTK	Q08380	441	SRRGPLVKYSSDYFQ	Q9HAC7	284	PYQAFKTKDGYIVVG
P02768	264	KLVTDLTKVHTECCH	Q08426	171	LKLGILDKVVNSDPV	Q9HAT8	164	AAGFDSSKNIFLGEK
P02768	28	VFRRDAHKSEVAHRF	Q08426	681	TVLEKLQKYYRQNPD	Q9HAW4	649	SEEDGEEKVEKEEKE
P02768	286	DDRADLAKYICENQD	Q08495	42	DNQVLGYKDLAAIPK	Q9HAW4	925	KFTSQAEKHLPRKSD
P02768	298	NQDSISSKLKECCEK	Q08554	804	HQTLESVKGVGQGDT	Q9HAW4	930	AEKHLPRKSDKKENM
P02768	300	DSISSKLKECCEKPL	Q08722	130	GETIIELKYRVVSWF	Q9HAW4	966	SELNKQEKESSMGDP
P02768	305	KLKECCEKPLLEKSH	Q08722	85	PTDFSSAKIEVSQLL	Q9HAZ2	857	QPPLHYAKPSPFFMD
P02768	310	CEKPLLEKSHCIAEV	Q08722	93	IEVSQLLKGDASLKM	Q9HAZ2	872	PIYSRVEKRKVTDPV
P02768	337	AADFVESKDVCKNYA	Q08AD1	714	KLNHTDGKSSGSSSQ	Q9HB55	209	PFLKNMKKLLKLDFL
P02768	341	VESKDVCKNYAEAKD	Q08AD1	722	SSGSSSQKTTPEGSE	Q9HB55	212	KNMKKLLKLDFLDPF
P02768	347	CKNYAEAKDVFLGMF	Q08AF3	477	VAYSLKQKLVNKGGY	Q9HB55	243	LNIGLFPKDVTHFLK
P02768	36	SEVAHRFKDLGEENF	Q08AG5	455	MSVSNVGKPSDLPHT	Q9HB71	143	ISVEGSSKKVKTDTV
P02768	375	VLLLRLAKTYETTLE	Q08AG5	464	SDLPHTFKCMEGLTL	Q9HB71	144	SVEGSSKKVKTDTVL
P02768	383	TYETTLEKCCAAADP	Q08AG5	483	MNVSSVVKPSFFPLP	Q9HB71	146	EGSSKKVKTDTVLIL
P02768	396	DPHECYAKVFDEFKP	Q08AH1	253	PSFPGSRKLRSLKTS	Q9HB71	207	EDGDDDMKRTINKAW
P02768	402	AKVFDEFKPLVEEPQ	Q08AH1	385	TYWGMKIKPGFMGKA	Q9HB71	33	RDALTAEKSKIETEI
P02768	413	EEPQNLIKQNCELFE	Q08ER8	149	QRGKLLEKMSSERDG	Q9HBH7	24	ANQENEEKEQVANKG
P02768	426	FEQLGEYKFQNALLV	Q08ER8	166	SDDGVCTKITQKQVS	Q9HBH7	4	****MESKEKRAVNS
P02768	437	ALLVRYTKKVPQVST	Q08J23	88	TGYKSHAKEILHCLK	Q9HBH7	6	**MESKEKRAVNSLS
P02768	438	LLVRYTKKVPQVSTP	Q09666	1005	MPKIKMPKFSMPSLK	Q9HBI1	347	DVVNLDLKSTLRVLY
P02768	44	DLGEENFKALVLIAF	Q09666	1024	EFDVNLSKANVDISA	Q9HBJ7	112	NKSQQPMKSDDDWSV
P02768	456	EVSRNLGKVGSKCCK	Q09666	1033	NVDISAPKVDTNAPD	Q9HBT6	277	NPPRFPQKHYQMSVL
P02768	460	NLGKVGSKCCKHPEA	Q09666	2449	KMPDMHFKAPNISMP	Q9HBT6	310	EGINAEMKYTIVDGD
P02768	463	KVGSKCCKHPEAKRM	Q09666	3356	KSRFKLPKFNFSGSK	Q9HBY8	135	KKSILKKKEQSHIMA
P02768	468	CCKHPEAKRMPCAED	Q09666	3478	NLKMPKMKMPKFSVS	Q9HC10	1278	MEPEVPIKKLETMVK
P02768	490	QLCVLHEKTPVSDRV	Q09666	5629	PKVEGGVKGGQIGLQ	Q9HC10	1543	QLNPVFGKSFDIEAS
P02768	499	PVSDRVTKCCTESLV	Q09666	5655	HLESGSGKVTFPKMK	Q9HC10	1587	LENRFYSKHRATCGI
P02768	524	VDETYVPKEFNAETF	Q09666	756	MPKMKMPKFSVPGFK	Q9HC36	403	SILLFEGKRQLRGRA
P02768	543	DICTLSEKERQIKKQ	Q09666	848	PKVESEIKVPDVELK	Q9HC38	181	LGMKIYEKDEEKQRA
P02768	548	SEKERQIKKQTALVE	Q09666	912	DVDISGPKVGVEVPD	Q9HC38	185	IYEKDEEKQRALLGY
P02768	549	EKERQIKKQTALVEL	Q09666	928	NIEGPEGKLKGPKFK	Q9HC77	399	FQKGKESKLVTNQST
P02768	558	TALVELVKHKPKATK	Q0VDF9	402	SARDILVKGVDESGA	Q9HC84	5052	ANVTCVNKHLPIKVS
P02768	560	LVELVKHKPKATKEQ	Q0ZLH3	153	RQSRSSRKAVLCVVM	Q9HCD6	1236	TWAMATSKPDIMIIL
P02768	565	KHKPKATKEQLKAVM	Q10469	416	ETLTISEKFTVVAIS	Q9HCE3	42	DDHESHMKQNAHGED
P02768	569	KATKEQLKAVMDDFA	Q10570	340	DKMVISLKGGEIYVL	Q9HCG7	904	KASWPKVKQGTGLRT
P02768	581	DFAAFVEKCCKADDK	Q10571	902	GTSSSGSKASGPPNP	Q9HCG8	505	AQQRTYEKFFGLLAG
P02768	584	AFVEKCCKADDKETC	Q10587	205	GELFNPRKHKFAEED	Q9HCH3	24	AGSIPATKVEITVSC
P02768	588	KCCKADDKETCFAEE	Q10713	483	DVKRVASKMLRGKPA	Q9HCH3	37	SCRNLLDKDMFSKSD
P02768	597	TCFAEEGKKLVAASQ	Q10713	488	ASKMLRGKPAVAALG	Q9HCI7	351	RSESDSEKVQPLPIS
P02768	598	CFAEEGKKLVAASQA	Q10713	513	IQTALSSKDGRLPRT	Q9HCI7	375	ASAPVTVKRESKISL
P02768	65	CPFEDHVKLVNEVTE	Q11201	210	SMILVPFKTIDLEWV	Q9HCJ1	42	NRGIAAVKEDAVEML
P02768	75	NEVTEFAKTCVADES	Q12756	1285	TQPAVVTKDFCMVFY	Q9HCJ5	741	TLVKIFRKQAVFLLE
P02768	88	ESAENCDKSLHTLFG	Q12756	1297	VFYSRDAKLPASRSI	Q9HCK4	171	TIYWKKDKVRIDDKE
P02768	97	LHTLFGDKLCTVATL	Q12756	880	VSEKGEVKGFLRVAV	Q9HCK4	790	ETRFHINKTVDAAIR
P02771	194	KIIPSCCKAENAVEC	Q12768	950	AYLEAIMKVGQMQIL	Q9HCL0	756	RPSRQIHKGDITLVP
P02771	205	AVECFQTKAATVTKE	Q12792	98	DHSHVRQKMLYAATR	Q9HCL0	871	DMDKFSLKDSGRGDS
P02774	114	GTAECCTKEGLERKL	Q12798	54	TIDAKELKVAMRALG	Q9HCM3	1081	TALFEVRKHHQGTYN
P02774	153	EAFRKDPKEYANQFM	Q12802	768	HPHPVVPKMEKELVP	Q9HCM9	402	WEVEVGDKTHWAVGV
P02774	201	SPTVCFLKERLQLKH	Q12802	771	PVVPKMEKELVPDQA	Q9HCS5	105	FYAEDPCKLKEEITR
P02774	207	LKERLQLKHLSLLTT	Q12830	1209	KQRLEKIKLEGGIKG	Q9HD15	19	EMAELYVKPGNKERG
P02774	229	QYAAYGEKKSRLSNL	Q12830	1215	IKLEGGIKGIGKTST	Q9HD90	185	PQSVLLEKHEDKSPI
P02774	238	SRLSNLIKLAQKVPT	Q12830	1219	GGIKGIGKTSTNSSK	Q9NNW7	340	DTSPDTQKILVDSRE
P02774	242	NLIKLAQKVPTADLE	Q12830	1226	KTSTNSSKNLSESPV	Q9NNZ6	33	RGHESSMKKLMACVS
P02774	264	DITNILSKCCESASE	Q12830	1579	IIPENDIKSLTVKES	Q9NP08	225	LESTFDLKRYLSSAE
P02774	276	ASEDCMAKELPEHTV	Q12830	1584	DIKSLTVKESAIRPF	Q9NP59	169	VAGEDRSKLANMNAT
P02774	284	ELPEHTVKLCDNLST	Q12830	1669	IETSEVKKVTSSPIT	Q9NP62	103	LRPAICDKARQKQQR
P02774	292	LCDNLSTKNSKFEDC	Q12830	1697	ENGLPINKNENVNGE	Q9NP64	88	IKVSLSMKVVNQGTG
P02774	30	YEKNKVCKEFSHLGK	Q12830	1706	ENVNGESKRKTVITE	Q9NP73	543	VVPLANLKPVTQVMS
P02774	332	DVELPTNKDVCDPGN	Q12840	618	LQVECHRKMEVTGRE	Q9NP73	561	WNAMPSRKGRGYQKM
P02774	341	VCDPGNTKVMDKYTF	Q12849	340	VGSYKGKKIASFPTA	Q9NP97	52	LMHSFILKARSTVRD
P02774	345	GNTKVMDKYTFELSR	Q12851	467	HGLPPTPKVHMGACF	Q9NP99	32	TEEKYELKEGQTLDV
P02774	363	LPEVFLSKVLEPTLK	Q12860	105	LVINNPDKQKDAGIY	Q9NP99	40	EGQTLDVKCDYTLEK
P02774	37	KEFSHLGKEDFTSLS	Q12860	700	SIPSNRIKTDGAAPN	Q9NPB3	143	FVELMGPKLLAETAD
P02774	370	KVLEPTLKSLGECCD	Q12860	756	FDGEEWKKVTVTNPD	Q9NPC3	119	SKAEGHLKQMEKIYT
P02774	388	STTCFNAKGPLLKKE	Q12874	97	QIKEFHRKHPNEICV	Q9NPF8	319	EAYEDLPKGIRGNRW
P02774	394	AKGPLLKKELSSFID	Q12884	510	LPKEEIKKLEVDEIT	Q9NPH3	148	PMKLPVHKLYIEYGI
P02774	402	ELSSFIDKGQELCAD	Q12884	532	PPQFDRSKKYPLLIQ	Q9NPH3	232	LTRTLTVKVVGSPKN
P02774	429	LAERLKAKLPDATPK	Q12905	141	AVAALGNKVVESLRA	Q9NPR2	419	DRVLNFLKDHFLMDG
P02774	436	KLPDATPKELAKLVN	Q12906	100	MRVGLVAKGLLLKGD	Q9NQ29	125	EVSAKAEKVHELNEE
P02774	440	ATPKELAKLVNKRSD	Q12907	303	VNFLKSPKDNVDDPT	Q9NQ29	154	GNVDESQKILMEVEK
P02774	471	SEIDAELKNIL****	Q12912	282	KKLEKSIKFLSQCAA	Q9NQ32	322	LLPLEGPKEEKVAMH
P02774	51	SLVLYSRKFPSGTFE	Q12913	903	QSLSEVLKYEIDVGN	Q9NQ35	75	LMETNLSKLRSGPRV
P02774	65	EQVSQLVKEVVSLTE	Q12955	1270	TTPLTFIKDCVSFTT	Q9NQ38	528	DGKMHGNKCAMCASV
P02774	94	RTSALSAKSCESNSP	Q12959	321	SEKIMEIKLIKGPKG	Q9NQ50	130	LYKQQERKMERDTIR
P02775	119	RIKKIVQKKLAGDES	Q12959	327	IKLIKGPKGLGFSIA	Q9NQ55	200	DFRHYSIKVVPVGAS
P02775	120	IKKIVQKKLAGDESA	Q12959	370	GKLQIGDKLLAVNNV	Q9NQ66	419	ENHVDSPKQQAKMAE
P02775	47	QTKRNLAKGKEESLD	Q12959	392	EEAVTALKNTSDFVY	Q9NQ66	423	DSPKQQAKMAEYCRL
P02775	49	KRNLAKGKEESLDSD	Q12979	593	IVDKIMGKGQIQLDP	Q9NQ79	236	AAEAGVSKYTGGRGV
P02775	75	TTSGIHPKNIQSLEV	Q13002	170	LVQFFKWKTVTVVYD	Q9NQ79	328	LQMSTHGKVRFRDIA
P02787	121	YYAVAVVKKDSGFQM	Q13011	267	LAAEISSKSPVAVQS	Q9NQA5	35	DWDQHLDKLHMLQQK
P02787	122	YAVAVVKKDSGFQMN	Q13011	276	PVAVQSTKVNLLYSR	Q9NQA5	656	EVFKNSDKEDDQEHP
P02787	215	SGAFKCLKDGAGDVA	Q13023	1024	LSKVEALKKGGVLLP	Q9NQA5	666	DQEHPSEKQPSGAES
P02787	225	AGDVAFVKHSTIFEN	Q13023	1025	SKVEALKKGGVLLPN	Q9NQB0	45	ERDLADVKSSLVNES
P02787	236	IFENLANKADRDQYE	Q13023	2276	NAASAKSKVQDLSLK	Q9NQC3	1179	NVKDAMAKIQAKIPG
P02787	258	RKPVDEYKDCHLAQV	Q13023	2290	KANQPTDKAALHPSP	Q9NQC3	411	DMLAAGGKIESNLES
P02787	278	VARSMGGKEDLIWEL	Q13029	1702	YITRQYRKVKAPAAA	Q9NQC7	658	YGYVCATKIMKLRKI
P02787	295	QAQEHFGKDKSKEFQ	Q13029	1704	TRQYRKVKAPAAAQF	Q9NQH7	247	IQRLRLIKSPAEIER
P02787	297	QEHFGKDKSKEFQLF	Q13033	618	RLWNPQEKLPCICTY	Q9NQH7	260	ERMQIAGKLTSQAFI
P02787	299	HFGKDKSKEFQLFSS	Q13033	629	ICTYNGDKKHGIPTS	Q9NQS1	245	RGPIFELKSVAAGCP
P02787	310	LFSSPHGKDLLFKDS	Q13033	630	CTYNGDKKHGIPTSV	Q9NQT8	1342	DSEAYIEKYLRSVLA
P02787	315	HGKDLLFKDSAHGFL	Q13061	462	EQEIRKEKSGKTSSI	Q9NQV6	714	ISRSKTFKPRITSTD
P02787	323	DSAHGFLKVPPRMDA	Q13061	465	IRKEKSGKTSSILKD	Q9NQW7	304	AVSETIPKDHRCCMP
P02787	331	VPPRMDAKMYLGYEY	Q13075	286	ELRLDSFKDWPRESA	Q9NQX0	3	*****MLKPGDPGGS
P02787	359	EAPTDECKPVKWCAL	Q13075	301	VGVAALAKAGLFYTG	Q9NQX3	328	FPLTSMDKAFITVLE
P02787	362	TDECKPVKWCALSHH	Q13075	569	VIGKLIQKNHLSRTC	Q9NR09	2270	SNKGSSYKLLVEQAK
P02787	373	LSHHERLKCDEWSVN	Q13087	396	PVKTLVGKNFEQVAF	Q9NR09	2277	KLLVEQAKLKQATSK
P02787	399	TTEDCIAKIMNGEAD	Q13087	422	APWCTHCKEMAPAWE	Q9NR20	170	TYNVVHMKDFFYFRN
P02787	453	FAIAVVKKSASDLTW	Q13094	468	LMVLYKDKVYNIQIR	Q9NR20	506	MTSPGQSKNFSLKNT
P02787	46	QSFRDHMKSVIPSDG	Q13094	478	NIQIRYQKESQVYLL	Q9NR20	511	QSKNFSLKNTNVLPP
P02787	464	DLTWDNLKGKKSCHT	Q13099	245	FSNAGILKMNMGNIY	Q9NR48	1011	SSVESSNKGKVQSKL
P02787	489	PMGLLYNKINHCRFD	Q13111	379	KKKKEEEKELKEKER	Q9NR48	358	VHKESGKKLGLGTVV
P02787	515	KKDSSLCKLCMGSGL	Q13131	23	QKHDGRVKIGHYILG	Q9NR48	921	VATESPSKLESESDN
P02787	530	NLCEPNNKEGYYGYT	Q13153	299	TGQEVAIKQMNLQQQ	Q9NR50	96	SLRYIYPKLKTDVLV
P02787	546	AFRCLVEKGDVAFVK	Q13162	78	DHSLHLSKAKISKPA	Q9NR77	135	IMNFLEGKDASAFAA
P02787	553	KGDVAFVKHQTVPQN	Q13163	146	SLPSNSLKKSSAELK	Q9NR82	37	GRLGSGMKDVESGRG
P02787	564	VPQNTGGKNPDPWAK	Q13201	882	PYYISVKKGSVVTNE	Q9NR83	99	AQRATPGKARLDEVM
P02787	571	KNPDPWAKNLNEKDY	Q13206	62	RLMQNYEKINVNEIT	Q9NRB3	86	KQSDLPRKETEQPPA
P02787	576	WAKNLNEKDYELLCL	Q13228	279	STIQRFYKNEGGTWS	Q9NRE2	789	SCMSPPQKHALSDIA
P02787	588	LCLDGTRKPVEEYAN	Q13228	397	IQLSLDGKRLYITTS	Q9NRE2	800	SDIADMVKVLPKATT
P02787	60	GPSVACVKKASYLDC	Q13291	77	LENSVENKIVSLDPS	Q9NRH2	45	TGEKVAVKVIDKTKL
P02787	61	PSVACVKKASYLDCI	Q13315	1656	VNLLQLSKMAINHTG	Q9NRL2	1023	ELLSEENKENGIIKT
P02787	618	DKEACVHKILRQQQH	Q13315	1972	KSMDDQEKRSLAFEE	Q9NRM0	133	LIVKMIGKVLGRKHT
P02787	646	CLFRSETKDLLFRDD	Q13315	1992	TISSLSEKSKEETGI	Q9NRM6	386	VQWLATQKKAADKVV
P02787	659	DDTVCLAKLHDRNTY	Q13330	462	ARSSGSPKFAMKTRQ	Q9NRM6	387	QWLATQKKAADKVVF
P02787	668	HDRNTYEKYLGEEYV	Q13330	596	NGVDGNMKKRLLMPS	Q9NRM6	391	TQKKAADKVVFLLSN
P02787	676	YLGEEYVKAVGNLRK	Q13394	107	LKLSDGRKRSMSLWV	Q9NRR4	382	NQSSGKDKNYTSIKE
P02787	683	KAVGNLRKCSTSSLL	Q13395	282	QADALTRKRARYLLQ	Q9NRR6	521	MRKGSIFKGFQEPDI
P02787	97	YLAPNNLKPVVAEFY	Q13402	1486	FSGPSLPKNDVIVAV	Q9NRY4	1199	DQASQGYKGDNAVIP
P02790	112	HNSVFLIKGDKVWVY	Q13426	169	FEKCVSAKEALETDL	Q9NRY4	253	LIDKSRGKTKIIPYF
P02790	115	VFLIKGDKVWVYPPE	Q13426	178	ALETDLYKRFILVLN	Q9NRY4	255	DKSRGKTKIIPYFEA
P02790	123	VWVYPPEKKEKGYPK	Q13427	382	SSGERWIKGDKSELN	Q9NS87	739	KLDEEEHKNLKLQQH
P02790	124	WVYPPEKKEKGYPKL	Q13428	1238	VSSTLAAKDDPDGKQ	Q9NS87	742	EEEHKNLKLQQHVDK
P02790	126	YPPEKKEKGYPKLLQ	Q13428	367	LQAKASGKTSQVGAA	Q9NSD4	88	QHGDSDGKRGSPQNL
P02790	130	KKEKGYPKLLQDEFP	Q13428	786	AQVKTSVKKTQAKAN	Q9NSD9	176	GPFTYTAKRPSDIKF
P02790	178	DLATGTMKERSWPAV	Q13428	791	SVKKTQAKANPAAAR	Q9NSE4	984	VIVMPTTKEKCPRCW
P02790	332	QVYVFLTKGGYTLVS	Q13439	1118	LQEQLKQKSAHVNSL	Q9NSE7	90	LRNQERQKVKVSCYK
P02790	343	TLVSGYPKRLEKEVG	Q13439	1133	AQDETKLKAHLEKLE	Q9NSI6	1731	SDLRVARKNWHANGY
P02790	347	GYPKRLEKEVGTPHG	Q13451	208	GIDKALEKMQREEQC	Q9NSI6	2279	ASAAAKKKLLNVYKE
P02790	386	RLWWLDLKSGAQATW	Q13459	378	IEDGEDLKHDFERLK	Q9NSI6	2285	KKLLNVYKEDDTTIN
P02790	402	ELPWPHEKVDGALCM	Q13459	385	KHDFERLKQAMEMVG	Q9NSI6	2297	TINSESEKELEDINR
P02790	41	NVAEGETKPDPDVTE	Q13464	1220	EPVQQAEKTNFQNHK	Q9NSV4	1102	MSQRPVLKVCNHENQ
P02790	411	DGALCMEKSLGPNSC	Q13464	770	ERMEDEVKNLTLQLE	Q9NSY1	321	FAFKFAKKDCPVSNI
P02790	441	YCYSDVEKLNAAKAL	Q13492	24	VTGSAVSKTVCKATT	Q9NSY1	350	ASEAAARKSQIKARI
P02790	77	FKGEFVWKSHKWDRE	Q13492	38	THEIMGPKKKHLDYL	Q9NSY1	693	HSGSPEKKAEHSSIN
P02790	91	ELISERWKNFPSPVD	Q13492	39	HEIMGPKKKHLDYLI	Q9NTI2	770	EIVDVVKKRVKAITL
P02794	120	QSLLELHKLATDKND	Q13506	333	ELSPKRIKVEDGFPD	Q9NU02	509	AGDLASLKKAFESGI
P03372	299	WPSPLMIKRSKKNSL	Q13508	50	CTDRMEIKYVPQLLK	Q9NU02	510	GDLASLKKAFESGIP
P03951	183	TRITKLDKVVSGFSL	Q13509	216	DICFRTLKLATPTYG	Q9NU22	1747	LRATKLKKPILLEGS
P03951	527	GYRKLRDKIQNTLQK	Q13509	252	QLNADLRKLAVNMVP	Q9NU22	1768	SLVGALAKASGNTLV
P03951	557	RGHKITHKMICAGYR	Q13516	148	PSVRKLSKIATLLLA	Q9NUD7	36	QQSKQETKPSTLPPV
P03952	117	ACHRDIYKGVDMRGV	Q13516	69	AGAHPGDKLGGSGFK	Q9NUD7	55	SLHTSKMKTLTRVQP
P03952	159	YATQTFHKAEYRNNC	Q13523	942	DKVTEREKVTVMSTI	Q9NUJ1	284	SDHRMREKADIQLLV
P03952	259	QRNVCLLKTSESGTP	Q13535	2023	FESNAIMKKYKDVTA	Q9NUL3	237	ESGPPHMKSFVTRVS
P03952	324	VCQETCTKMIRCQFF	Q13561	146	AKQLAALKQQLVASH	Q9NUL3	257	AEGEGNSKKLSKKRA
P03952	459	LNLSDITKDTPFSQI	Q13561	156	LVASHLEKLLGPDAA	Q9NUL3	258	EGEGNSKKLSKKRAA
P03952	467	DTPFSQIKEIIIHQN	Q13561	175	DPDGALAKRLLLQLE	Q9NUP7	426	LSVEEKKKIGHLCKL
P03952	528	GWGFSKEKGEIQNIL	Q13568	85	VDEADPAKWKANLRC	Q9NUQ3	200	HLQSEHSKAILARSK
P03952	537	EIQNILQKVNIPLVT	Q13569	184	DDHTLPGKYGIGFTN	Q9NUQ6	426	HQTMPANKQNGSSNQ
P03952	556	QKRYQDYKITQRMVC	Q13576	227	AINEAVEKGIAEQTV	Q9NV70	226	KLLDEALKEVDQIEL
P03952	567	RMVCAGYKEGGKDAC	Q13576	948	TALEEEIKSKVDQVQ	Q9NV88	193	EVNSALSKIQLVGYS
P03952	571	AGYKEGGKDACKGDS	Q13576	966	TGNPTVIKMVVSFNR	Q9NVA1	169	KQEGRSGKYMCRIIV
P03952	624	YMDWILEKTQSSDGK	Q13615	311	SLAIQPQKLLILDAR	Q9NVA1	254	LLVEYVRKQIQYLDS
P03952	631	KTQSSDGKAQMQSPA	Q13617	650	NFSSKRTKFKITTSM	Q9NVC6	606	NQCKDLPKSDVLQDN
P03952	73	SSINDMEKRFGCFLK	Q13617	677	SAVDEDRKMYLQAAI	Q9NVE5	1121	VEKIEIAKYFPEKFE
P03952	89	SVTGTLPKVHRTGAV	Q13619	359	VINPEKDKDMVQDLL	Q9NVE5	1126	IAKYFPEKFEWLPIS
P03956	404	YWRYDEYKRSMDPGY	Q13619	369	VQDLLDFKDKVDHVI	Q9NVF7	108	MLNQGFLKVERYHNL
P03956	425	DFPGIGHKVDAVFMK	Q13753	158	DAGRCVCKPAVTGER	Q9NVF7	118	RYHNLCQKQVKAQLP
P03973	28	WAVEGSGKSFKAGVC	Q13797	545	TMGQVTEKLQLTYME	Q9NVH1	264	VLARNLDKNTVGYLQ
P04003	111	YNTFCIYKRCRHPGE	Q13813	1485	DSVEALIKKHEDFDK	Q9NVH2	672	GRISNQMKQSMEEFR
P04003	241	CEKITCRKPDVSHGE	Q13813	1828	QGVLDTGKKLSDDNT	Q9NVH2	798	FQRYFFQKLQSTSIK
P04003	260	FGPIYNYKDTIVFKC	Q13823	104	EEMDTVMKDPYKVVM	Q9NVH2	805	KLQSTSIKLALSPSP
P04003	266	YKDTIVFKCQKGFVL	Q13823	94	IKQSSLQKFQEEMDT	Q9NVH2	830	NNQQLALKVEGVVQH
P04003	431	DICNFPPKIAHGHYK	Q13867	68	GKPITNQKSSGRCWI	Q9NVM9	35	VEFDMLVKNRTQGII
P04003	438	KIAHGHYKQSSSYSF	Q13882	240	QSEIQAMKKLRHKHI	Q9NVM9	49	IPLAPISKSLWTCSV
P04003	481	SAPAPQCKALCRKPE	Q14004	294	KEPPSAYKEPPKAYR	Q9NVN8	477	IADAIENKTTVYKIG
P04003	566	LPNPEDVKMALEVYK	Q14012	49	TQKLVAIKCIAKEAL	Q9NVN8	482	ENKTTVYKIGDLTGY
P04003	573	KMALEVYKLSLEIEQ	Q14093	276	KGKKDKKKPSSTDSD	Q9NVR2	390	DDEDCSAKGRNRHIV
P04003	78	FKTGTTLKYTCLPGY	Q14093	285	SSTDSDSKDDVKKES	Q9NVR5	3	*****MAKAAASSSL
P04004	186	YCYELDEKAVRPGYP	Q14118	95	ASSGDIIKVSAAGKE	Q9NVR7	64	WRHIACGKLQLAKDL
P04004	194	AVRPGYPKLIRDVWG	Q14123	596	GKNSKAEKSSGEQQQ	Q9NVX7	36	RVAQGIMKLCLEEEL
P04004	275	RERVYFFKGKQYWEY	Q14126	180	AAHTLVMKINATDAD	Q9NW08	305	GGGPKKTKIEEAREL
P04004	36	TEGFNVDKKCQCDEL	Q14137	614	LLRQELTKKLMPNCK	Q9NW13	39	QCFVVTEKGSKACRG
P04004	367	APRPSLAKKQRFRHR	Q14151	432	NLFSKYGKVVGAKVV	Q9NW75	416	NRAERGHKKNCSVRT
P04004	368	PRPSLAKKQRFRHRN	Q14156	327	EAVAIAAKGSIGPTV	Q9NWQ4	415	CSRDIKRKRKPVATA
P04040	237	VYCKFHYKTDQGIKN	Q14157	102	SWEMVGKKKGVSGQK	Q9NWQ4	417	RDIKRKRKPVATASL
P04040	243	YKTDQGIKNLSVEDA	Q14157	103	WEMVGKKKGVSGQKD	Q9NWQ4	446	TPASQAPKSPSSEWL
P04040	468	ENIAGHLKDAQIFIQ	Q14157	121	TESNEEGKENRDRDR	Q9NWS8	74	ILEMNQKKSDTSMLS
P04040	480	FIQKKAVKNFTEVHP	Q14185	253	LYDPVESKFISENYL	Q9NWS8	92	AARCQDEKAHLPTMK
P04040	98	ITKYSKAKVFEHIGK	Q14204	2183	TALREELKKVCQEMY	Q9NWU5	106	QLEFNDKKGAKIIKE
P04053	481	HALYDKTKRIFLKAE	Q14204	2184	ALREELKKVCQEMYL	Q9NWU5	22	HNLRSRGKLALGVLP
P04062	113	LTLQPEQKFQKVKGF	Q14204	2206	VGGMWVEKVLQLYQI	Q9NWV4	42	NCGEISDKWQYIRLM
P04070	259	AHCMDESKKLLVRLG	Q14204	323	FDTDTGLKQALETVN	Q9NWX5	397	WPVDVKVKALPLPDR
P04075	108	KGGVVGIKVDKGVVP	Q14204	3284	SVKEDLDKVEPAVIE	Q9NWZ8	211	LYGDSAAKIQAMEAA
P04075	14	ALTPEQKKELSDIAH	Q14204	337	NDYNPLMKDFPLNDL	Q9NX57	159	EDAVALYKKILKYKM
P04075	140	ERCAQYKKDGADFAK	Q14204	4154	FEPPPGVKANMLRTF	Q9NX57	160	DAVALYKKILKYKML
P04075	153	AKWRCVLKIGEHTPS	Q14207	426	ISTSIQKKAFKTAVP	Q9NX58	113	NVPRKKAKFQNWMKN
P04075	230	YLEGTLLKPNMVTPG	Q14241	386	GAGDLLPKVKEKGSN	Q9NX58	119	AKFQNWMKNSLKVHN
P04083	287	EKLHQAMKGVGTRHK	Q14247	379	ERAQRMAKERQEQEE	Q9NX58	316	FNWKGTIKAILKQAP
P04083	97	KPLDETLKKALTGHL	Q14254	160	TIKDVYDKVDYLSSL	Q9NX58	320	GTIKAILKQAPDNEI
P04085	77	ATKHVPEKRPLPIRR	Q14254	205	KKEMLDVKFMADTKI	Q9NX58	369	ISKNPTFKLLKDKVK
P04114	100	KTSQCTLKEVYGFNP	Q14254	211	VKFMADTKIADSKRA	Q9NX58	372	NPTFKLLKDKVKLVK
P04114	1034	RALVDTLKFVTQAEG	Q14254	223	KRAFELQKSAFSEEV	Q9NX77	418	TLDISQLKEQIFEAS
P04114	1043	VTQAEGAKQTEATMT	Q14254	233	FSEEVNIKTAEAQLA	Q9NX77	55	KGLPDCPKKPTNGPF
P04114	1052	TEATMTFKYNRQSMT	Q14254	305	QQIAEGEKVKQVLLA	Q9NXB9	293	AANGVMNKKAQ****
P04114	1087	NDESTEGKTSYRLTL	Q14254	307	IAEGEKVKQVLLAQA	Q9NXG0	1102	KQLQYKLKNATNELT
P04114	110	YGFNPEGKALLKKTK	Q14254	318	LAQAEAEKIRKIGEA	Q9NXL9	460	ILAATNPKGQYDPQE
P04114	1119	CDTKEERKIKGVISI	Q14254	321	AEAEKIRKIGEAEAA	Q9NXR1	6	**MEDSGKTFSSEEE
P04114	1121	TKEERKIKGVISIPR	Q14254	335	AVIEAMGKAEAERMK	Q9NXS3	456	VERYDPSKDSWEMVA
P04114	117	KALLKKTKNSEEFAA	Q14254	342	KAEAERMKLKAEAYQ	Q9NXS3	468	MVASMADKRIHFGVG
P04114	1291	RVKYTLNKNSLKIEI	Q14254	344	EAERMKLKAEAYQKY	Q9NXZ1	452	RMENGQRKQDNVLSN
P04114	1311	GKSSRDLKMLETVRT	Q14254	350	LKAEAYQKYGDAAKM	Q9NY15	98	CRKQVVQKACCPGYW
P04114	132	AMSRYELKLAIPEGK	Q14254	356	QKYGDAAKMALVLEA	Q9NY46	1082	GTGSSVEKYVIDEND
P04114	1324	RTPALHFKSVGFHLP	Q14254	370	ALPQIAAKIAAPLTK	Q9NY47	517	QDGPGEKKNQLILGV
P04114	139	KLAIPEGKQVFLYPE	Q14254	390	VLSGDNSKVTSEVNR	Q9NY61	243	QLLEGRIKLQKALLT
P04114	1436	KFLDSNIKFSHVEKL	Q14315	953	YGGDPVPKSPFVVNV	Q9NY61	246	EGRIKLQKALLTTNQ
P04114	1442	IKFSHVEKLGNNPVS	Q14315	968	APPLDLSKIKVQGLN	Q9NY61	264	PDVFPLFKDKGGPEF
P04114	147	QVFLYPEKDEPTYIL	Q14324	535	IKVEYVPKQEPPKIH	Q9NY74	442	DARLGDSKVLQDLSS
P04114	1586	KNFATSNKMDMTFSK	Q14324	561	IVVVAGNKLRLDVSI	Q9NY74	657	TQQQDIRKDSKTSES
P04114	1635	ADILGTDKINSGAHK	Q14432	947	LVCQMCIKLADINGP	Q9NY91	611	DLFCGLQKGPKLTKE
P04114	1642	KINSGAHKATLRIGQ	Q14515	159	NQQESITKREENQEQ	Q9NY91	614	CGLQKGPKLTKEEEE
P04114	1778	DNIYSSDKFYKQTVN	Q14520	372	DIKTRHLKVVLGDQD	Q9NY91	625	EEEEALSKKLTDTSE
P04114	1802	TTLNSDLKYNALDLT	Q14520	397	FRVEKIFKYSHYNER	Q9NY97	268	SLSKTKAKDLFIGDV
P04114	1820	KLRLEPLKLHVAGNL	Q14520	418	DIALLKLKPVDGHCA	Q9NYB9	123	KNTSRTHKIIAPANL
P04114	1837	AYQNNEIKHIYAISS	Q14520	432	ALESKYVKTVCLPDG	Q9NYC9	1136	SESGLLKKVEKGDFQ
P04114	1958	SHHLVSRKSISAALE	Q14520	555	NWIKATIKSESGF**	Q9NYC9	3122	TDKVSREKAMADEEE
P04114	196	HFTVKTRKGNVATEI	Q14524	1419	LLQVATFKGWMDIMY	Q9NYC9	3176	KTNLTELKSFGSPPL
P04114	1982	AEQTGTWKLKTQFNN	Q14527	355	EKADGLSKDASRCSE	Q9NYC9	3307	QEKLAAIKAKIAHLN
P04114	1984	QTGTWKLKTQFNNNE	Q14549	260	GVTAPGGKSRRRRTA	Q9NYC9	4244	NIPELMAKVEERTPY
P04114	2004	DAYNTKDKIGVELTG	Q14558	176	RNAVIVAKSPDAAKR	Q9NYH9	360	RTMTVFRKAHELKLL
P04114	2100	ENVQRNLKHINIDQF	Q14562	612	AGYTSRGKIGCTQPR	Q9NYH9	365	FRKAHELKLLSECQY
P04114	2139	ERQVSHAKEKLTALT	Q14566	796	ELTQAGLKGSTEGSE	Q9NYH9	373	LLSECQYKQLSVSLL
P04114	2141	QVSHAKEKLTALTKK	Q14571	109	QNESENKKLLGEIVK	Q9NYH9	575	QIYWRAMKMLQGESA
P04114	2164	QIALDDAKINFNEKL	Q14573	1312	TVIKAEGKYVKKCQD	Q9NYH9	588	SAEAFVAKHAMHQTG
P04114	2265	IRIQIQEKLQQLKRH	Q14584	136	SVFSQCGKAFSLNPD	Q9NYI0	941	KSHESKLKQITTELA
P04114	2284	DIQHLAGKLKQHIEA	Q14584	163	FDCSDSGKSFINHSH	Q9NYL5	312	SVFGKAGKDKIKVSE
P04114	2286	QHLAGKLKQHIEAID	Q14624	111	QYSAAVAKGKSAGLV	Q9NYQ7	1722	TMAGCQAKLHFCDSG
P04114	2578	QDWAKRMKALVEQGF	Q14624	113	SAAVAKGKSAGLVKA	Q9NYU1	1386	ASHLLRRKYHISALY
P04114	2697	DIYLRDLKVEDIPLA	Q14624	119	GKSAGLVKATGRNME	Q9NYU1	927	NMSDFIMKVDALMSS
P04114	287	AQVTQTLKLEDTPKI	Q14624	151	LVYEELLKRRLGVYE	Q9NYU2	306	GQLKELRKHLVESTN
P04114	2915	NEIKTLLKAGHIAWT	Q14624	162	GVYELLLKVRPQQLV	Q9NYU2	347	ELALVVMKDLSQNFP
P04114	293	LKLEDTPKINSRFFG	Q14624	170	VRPQQLVKHLQMDIH	Q9NYU2	744	NSMNYLTKKGMSSKE
P04114	3014	MALFGEGKAEFTGRH	Q14624	216	TKAHIRFKPTLSQQQ	Q9NYU2	745	SMNYLTKKGMSSKEI
P04114	3034	GKVIGTLKNSLFFSA	Q14624	224	PTLSQQQKSPEQQET	Q9NYY8	20	VESKMNNKAGSFFWN
P04114	305	FFGEGTKKMGLAFES	Q14624	281	NVVFVIDKSGSMSGR	Q9NZ08	467	GIVQYLQKHSYKNTK
P04114	314	GLAFESTKSTSPPKQ	Q14624	299	QTREALIKILDDLSP	Q9NZ32	403	EMMFDVGKTQPPLMK
P04114	3148	IITTPPLKDFSLWEK	Q14624	30	HQTTTAEKNGIDIYS	Q9NZ32	410	KTQPPLMKRAFSTEK
P04114	3159	LWEKTGLKEFLKTTK	Q14624	336	ASAENVNKARSFAAG	Q9NZ52	198	QEANKLIKSMVKEDE
P04114	3163	TGLKEFLKTTKQSFD	Q14624	487	NNFRLLFKGSEMVVA	Q9NZC9	851	PLIQEKIKVLAEAGL
P04114	320	TKSTSPPKQAEAVLK	Q14624	496	SEMVVAGKLQDRGPD	Q9NZI2	86	VVNEDTFKQIYAQFF
P04114	3232	ETKIKFDKYKAEKSH	Q14624	626	HSGSTFFKYYLQGAK	Q9NZI8	345	RAEQEIMKKVREAYE
P04114	3237	FDKYKAEKSHDELPR	Q14624	633	KYYLQGAKIPKPEAS	Q9NZJ4	4020	TGLIRIMKHENDNAF
P04114	327	KQAEAVLKTLQELKK	Q14624	636	LQGAKIPKPEASFSP	Q9NZJ4	780	HPSVSWLKMVWKNLY
P04114	334	KTLQELKKLTISEQN	Q14624	75	TFQMELPKKAFITNF	Q9NZL3	678	QRVHMGEKTWKCREC
P04114	350	QRANLFNKLVTELRG	Q14624	777	TGQYEREKAGFSWIE	Q9NZM5	85	LSEAPNEKLFFVDTG
P04114	3531	KSTRSSVKLQGTSKI	Q14624	813	NRRSSAYKWKETLFS	Q9NZP8	252	TLGSSRAKLGNFPWQ
P04114	3673	EGHLRFLKNIILPVY	Q14624	815	RSSAYKWKETLFSVM	Q9NZP8	72	QESSTDIKAPEGFAV
P04114	3724	YSFSIPVKVLADKFI	Q14624	831	GLKMTMDKTGLLLLS	Q9P055	193	LRPLLVKKIACGLGK
P04114	3790	LPTLPEVKFPEVDVL	Q14643	981	DIMVMDTKLKIIEIL	Q9P0I2	66	RVLRENGKYIPKQSF
P04114	3846	DLNAVANKIADFELP	Q14651	471	AVELGKNKAKFSLVG	Q9P0J6	22	YLSRHTVKPRALSTF
P04114	3905	WSASLKNKADYVETV	Q14651	473	ELGKNKAKFSLVGIA	Q9P0K7	120	ESVDSSGKTALHYAA
P04114	3944	EDGTLASKTKGTFAH	Q14667	1847	KSLQDDSKNENLLDL	Q9P0K7	770	VEVAKLEKQLLEEKA
P04114	3979	GKAHLNIKSPAFTDL	Q14667	898	HDNYELMKDESKESA	Q9P0K7	806	EVSVLASKLKESVKE
P04114	3995	LRYQKDKKGISTSAA	Q14669	799	TARAIQRKPNPLANS	Q9P0L1	670	YECNECGKVFSYSSS
P04114	4035	PQSSPDKKLTIFKTE	Q14683	648	LDGTLFQKSGVISGG	Q9P0W8	166	LSLHKSSKVITNGPE
P04114	4040	DKKLTIFKTELRVRE	Q14689	962	VGNLVAGKRIAQASG	Q9P0W8	174	VITNGPEKNSSSSPS
P04114	4071	SGLLTSLKDNVPKAT	Q14690	1657	SFREEQEKLNVWVAL	Q9P0W8	192	YAASGPRKLSSGALY
P04114	4087	VLYDYVNKYHWEHTG	Q14690	740	IGFVKSIKDYGVFIQ	Q9P1A6	886	KRMEGWCKEMEREAE
P04114	4168	QASFQGLKDNVFDGL	Q14692	333	RCLNEKEKLVYAPLS	Q9P1W3	303	CARLCFCKCWTCFKE
P04114	4461	ILTDPDGKGKEKIAE	Q14697	899	VVIIGAGKPAAVVLQ	Q9P1W9	23	PTPPPGGKDREAFEA
P04114	4465	PDGKGKEKIAELSAT	Q14699	509	GGVSEEMKGPVQEDK	Q9P1W9	4	****MLTKPLQGPPA
P04114	4478	ATAQEIIKSQAIATK	Q14739	409	VMLLAEMKIQDRAVP	Q9P202	889	RIIAEAFKTKDRDYI
P04114	51	TRFKHLRKYTYNYEA	Q14764	723	VESTGTAKAEAESRA	Q9P203	130	PEARTLQKDMADLYE
P04114	525	KPSLMIQKAAIQALR	Q14773	132	TSRITAYKPPHSVIL	Q9P217	359	GGYCGSGKQLNSMFA
P04114	539	RKMEPKDKDQEVLLQ	Q14773	145	ILEPPVLKGRKYTLR	Q9P218	1182	PTGLPGPKGERGEKG
P04114	641	SRNYQLYKSVSLPSL	Q14789	1711	HPAGDTAKECMETLL	Q9P218	1209	SQASHVSKFDSFHEN
P04114	654	SLDPASAKIEGNLIF	Q14790	148	DIFIEMEKRVILGEG	Q9P218	316	NVFAVGVKNADEAEL
P04114	669	DPNNYLPKESMLKTT	Q14831	447	MEQAGGKKLLKYIRN	Q9P219	2006	CSRGSVSKSSPASPE
P04114	707	TLEALFGKQGFFPDS	Q14831	450	AGGKKLLKYIRNVNF	Q9P225	3144	EPTWAEAKRQLGEQN
P04114	717	FFPDSVNKALYWVNG	Q14831	788	PENFNEAKPIGFTMY	Q9P241	963	MLMSTILKELQKKTQ
P04114	732	QVPDGVSKVLVDHFG	Q14831	817	GTAQSAEKLYIQTTT	Q9P244	560	VLLMIRYKVYGDGDS
P04114	742	VDHFGYTKDDKHEQD	Q14832	757	LCTVYAFKTRKCPEN	Q9P258	77	ARPATAGKAGGAAVV
P04114	745	FGYTKDDKHEQDMVN	Q14839	1865	EELLSDMKADVTRLP	Q9P258	92	ITEPEHTKERVKLEG
P04114	760	GIMLSVEKLIKDLKS	Q14839	577	MFRNYQRKNDMDEPP	Q9P260	652	QQMLMEDKADLVREA
P04114	79	SATRINCKVELEVPQ	Q14865	278	SNNNSDGKAVAKVKC	Q9P266	226	HVLNSQNKGKSRSLP
P04114	921	HVALKAGKLKFIIPS	Q14865	49	FFVRCTPKDPICIAE	Q9P273	2395	RNNNPASKIHDVKDY
P04114	923	ALKAGKLKFIIPSPK	Q14865	536	VAEEAGEKGPTPPLP	Q9P273	2400	ASKIHDVKDYITDVN
P04114	93	QLCSFILKTSQCTLK	Q14865	551	SAPLAPEKDSALVPG	Q9P275	33	KLLASSAKKVLLQKI
P04114	930	KFIIPSPKRPVKLLS	Q14929	10	PGLLTTRKEALMAFR	Q9P278	86	KTEDVPIKISAKCCQ
P04114	934	PSPKRPVKLLSGGNT	Q14966	1345	MDAEKVEKMAAMKEK	Q9P299	205	QSAKEQIKWSLLK**
P04114	949	LHLVSTTKTEVIPPL	Q14966	371	VGSRGSKKNYQSQAD	Q9P2B7	122	SIPNRIPKIVKEGED
P04180	129	IRVPGFGKTYSVEYL	Q14974	403	GPEPSQLKPLVIQAM	Q9P2D1	2656	VVNKRNGKKMGGAMA
P04181	31	SATSVATKKTVQGPP	Q14980	1059	LAHALTEKEGKDQEL	Q9P2D1	2667	GAMAPPMKDLPRWLE
P04196	106	EIVIGQCKVIATRHS	Q14980	1062	ALTEKEGKDQELAKL	Q9P2D3	1424	MEKLAVLKAWAEVYV
P04196	139	SSALANTKDSPVLID	Q14993	363	LNGENGLKGDLGPHG	Q9P2D3	74	PTRKLLAKNLAALYS
P04196	164	QANKALEKYKEENDD	Q14993	375	PHGPPGPKGEKGDTG	Q9P2D6	458	GLSSPELKVRPAGAS
P04196	166	NKALEKYKEENDDFA	Q14993	378	PPGPKGEKGDTGPPG	Q9P2D6	731	SIGESLTKLRSNLPA
P04196	279	STTKPPFKPHGSRDH	Q14993	404	GPQGPPGKEGQRGRR	Q9P2D6	754	VVSGDTIKLPDISAT
P04196	466	YRLPPLRKGEVLPLP	Q14995	142	IQYKKCLKNENCSIM	Q9P2D8	1912	STQYRQMKRGSLGVL
P04196	490	PHHKHPLKPDNQPFP	Q14997	850	MVSLEETKLYTGLEY	Q9P2E2	205	VGYTLMNKDSSRSHS
P04196	507	VSESCPGKFKSGFPQ	Q149M9	1195	SPQSSSFKVWDLSDA	Q9P2E9	1241	QSQLDAAKSEAQKQS
P04196	509	ESCPGKFKSGFPQVS	Q149N8	1176	NYKQQTGKLSMSEKF	Q9P2E9	270	EGAQNQGKKVDTTPN
P04196	525	FFTHTFPK*******	Q149N8	1647	ERMQAMLKTAERSHT	Q9P2E9	620	AQSPEAPKQEAPAKK
P04208	51	TPKLLIYKDNQRPSG	Q149N8	242	KKFNQLMKKVMEKLH	Q9P2E9	626	PKQEAPAKKKSGSKK
P04216	21	LQVSRGQKVTSLTAC	Q149N8	243	KFNQLMKKVMEKLHN	Q9P2F5	705	FSKDTLFKPLHSTLS
P04217	106	TGWTQLSKLLELTGP	Q14C86	246	GSDRFRQKVQEMVES	Q9P2F8	1189	KWHGPPSKVLGSYKE
P04217	114	LLELTGPKSLPAPWL	Q14C86	964	RGETEERKDSDDEKS	Q9P2F8	1195	SKVLGSYKERALQKD
P04217	134	SWITPGLKTTAVCRG	Q14CX5	396	DLVLNHRKQAASALL	Q9P2F8	1201	YKERALQKDGSCKDS
P04217	248	FQLRRGEKELLVPRS	Q14D04	805	VFKAKDEKNAEEWLQ	Q9P2H5	298	KGLAAVKKFSILIEV
P04217	78	HLDSPAIKHQFLLTG	Q14D04	822	NVAVAQAKERESREV	Q9P2K2	155	QNIENALKGKANIIF
P04220	91	VSWLREGKQVGSGVT	Q15005	173	FDDKYTLKLTFISGR	Q9P2K3	42	YHSIPDAKLDEYIAI
P04275	1371	TLFQIFSKIDRPEAS	Q15005	182	TFISGRTKQQREAEF	Q9P2K5	586	CRIMNGIKISGREID
P04275	1423	IGPHANLKQIRLIEK	Q15007	98	TTQIQYLKQVQQPSV	Q9P2K9	1383	VLLQSGYKIPLPAGA
P04275	457	GLHNSLVKLKHGAGV	Q15020	223	SVGLHMTKGLALWEA	Q9P2L0	653	VLLDEILKDPEHPNK
P04278	163	VSGPLTSKRHPIMRI	Q15020	246	VEAARLEKVHSLFRR	Q9P2L0	660	KDPEHPNKDYLINFE
P04278	202	RRDSWLDKQAEISAS	Q15020	491	RLCNNMQKARELWDS	Q9P2N4	1471	RNVYCMAKDGSHLES
P04278	322	VVLSQGSKMKALALP	Q15020	506	IMTRGNAKYANMWLE	Q9P2P1	644	PAGPKTPKAQAGPAA
P04406	107	GVFTTMEKAGAHLQG	Q15024	260	FEMMETGKRVGKVLH	Q9P2P6	2021	ERNPSECKSQEMLNP
P04406	145	EKYDNSLKIISNASC	Q15025	341	KITELRQKLADLQKQ	Q9P2P6	2035	PNREPSGKKQNKRVN
P04406	162	NCLAPLAKVIHDNFG	Q15040	30	PPQIYHEKQRRELCA	Q9P2P6	3092	PEKKVAEKQASTELE
P04406	186	HAITATQKTVDGPSG	Q15043	267	SESLPSKKDQEEGVM	Q9P2P6	4193	SQDSEWSKREQIPLQ
P04406	194	TVDGPSGKLWRDGRG	Q15043	276	QEEGVMEKLQNGDLD	Q9P2Y5	402	IKDNINDKLTEKERE
P04406	215	PASTGAAKAVGKVIP	Q15058	727	KAEIAKLKAAQRNSR	Q9P2Y5	406	INDKLTEKEREFPLY
P04406	219	GAAKAVGKVIPELNG	Q15061	165	CKVKCKWKGDNSSVS	Q9UBC5	792	QKFLLGLKNNLPSTN
P04406	227	VIPELNGKLTGMAFR	Q15063	497	EIIKPAEKSLHEKLK	Q9UBC5	803	PSTNVLDKTWPAAPY
P04406	260	AKYDDIKKVVKQASE	Q15075	948	IQAQNTLKQNEKEEQ	Q9UBJ2	149	TFIIKLIKWLMIAIP
P04406	263	DDIKKVVKQASEGPL	Q15075	965	QGNINELKQSSEQKK	Q9UBJ2	722	QRLNELCKILGEDSV
P04406	334	LMAHMASKE******	Q15084	245	PTIKIFQKGESPVDY	Q9UBK2	278	KGSPFENKTIERTLS
P04406	5	***MGKVKVGVNGFG	Q15084	73	KKAATALKDVVKVGA	Q9UBP9	105	ISFCADDKTDKRIFT
P04406	55	QYDSTHGKFHGTVKA	Q15111	577	VDYNGEQKQIRLCRE	Q9UBP9	108	CADDKTDKRIFTFIC
P04406	61	GKFHGTVKAENGKLV	Q15111	593	SDLVSICKSVQYRDF	Q9UBR2	281	RIVTSTYKDGKGARY
P04424	106	LIGATAGKLHTGRSR	Q15116	131	GAISLAPKAQIKESL	Q9UBT6	671	VSATKVNKKENVPAS
P04438	92	ETRLTISKDTSKNQV	Q15147	1010	QTLTSDHKSKVKEIV	Q9UBX1	122	GRHVLLRKDCGPVDT
P04632	179	KRWQAIYKQFDTDRS	Q15147	1012	LTSDHKSKVKEIVAQ	Q9UDR5	584	SYITPALKELEKSVE
P04792	114	DELTVKTKDGVVEIT	Q15147	1066	EQQTQQLKLSHDRES	Q9UDR5	70	NRRAIHDKDYVKAGG
P04792	123	GVVEITGKHEERQDE	Q15149	2078	FEKAAAGKAELELEL	Q9UDX4	253	TDPDGNPKCLTKINY
P04899	198	TFKDLHFKMFDVGGQ	Q15149	2450	ALAEKMLKEKMQAVQ	Q9UF33	510	TGLKPATKYVFHIRV
P04920	583	ISTLMSDKQFHEAAY	Q15149	3373	QARETFEKTPVEVPV	Q9UFD9	611	QLQAALLKNAWLAEE
P05019	75	DRGFYFNKPTGYGSS	Q15173	233	GLRAYIRKQCNHIFL	Q9UFH2	3271	KLSRIKNKIAELNAN
P05023	494	KYQLSIHKNPNTSEP	Q15256	265	SLRQDKEKNQEIHLS	Q9UG01	1444	QNYKILHKYVALYAT
P05089	39	RKAGLLEKLKEQECD	Q15262	262	FRLQEVTKTDQDLYR	Q9UG56	174	EFFRRKLKPQARPVC
P05089	83	ASEQLAGKVAEVKKN	Q15269	878	QYALAVSKQRGTKRS	Q9UGL1	1070	VAEVQAWKECAVNTF
P05090	164	PETVDSLKNILTSNN	Q15276	199	EKEIAALKDKLTEAE	Q9UGM5	185	YNNENTSKQYSLFKV
P05090	187	TDQVNCPKLS*****	Q15276	201	EIAALKDKLTEAEDK	Q9UGM5	313	YLPDLDDKNSQEKGP
P05090	41	QENFDVNKYLGRWYE	Q15276	208	KLTEAEDKIKELEAS	Q9UGN5	225	TKKEESLKSPLKPES
P05106	438	GCPQEKEKSFTIKPV	Q15311	308	QEFQRLLKELPECNY	Q9UGN5	229	ESLKSPLKPESQLDL
P05106	669	RDEIESVKELKDTGK	Q15363	117	IDIGEAPKGQDMETE	Q9UGU5	60	NSSKKKLKDSELYFL
P05109	35	AVYRDDLKKLLETEC	Q15365	23	IRLLMHGKEVGSIIG	Q9UH90	675	PFNIVEHKTDPILLT
P05109	7	*MLTELEKALNSIID	Q15382	109	KLLDMVGKVQIPIML	Q9UH99	36	GSQSTLFKDSPLRTL
P05114	61	GKRGAKGKQAEVANQ	Q15392	496	LYHKLREKLGCQDAF	Q9UHB6	53	EETNMEKKRSNTENL
P05114	82	PAENGETKTEESPAS	Q15392	509	AFPEVYDKICKAARH	Q9UHD8	563	HFEAYRVKRLNEGSS
P05121	177	MISNLLGKGAVDQLT	Q15404	155	ILPPDIGKLTKLQIL	Q9UHF7	396	SDSGDLGKWQDKITV
P05121	199	LYFNGQWKTPFPDSS	Q15404	174	NDLISLPKEIGELTQ	Q9UHF7	457	KLLEHYGKQHGAVQS
P05154	170	RDSAGAMKQINDYVA	Q15417	172	GLQMGTNKCASQAGM	Q9UHF7	474	LNPELNDKLSRGSVI
P05155	201	ESILSYPKDFTCVHQ	Q15417	53	PNFQLGLKDGIILCE	Q9UHH9	243	KAANQIRKCQQSTSA
P05155	211	TCVHQALKGFTTKGV	Q15431	157	ELQFGNEKVSLKLEE	Q9UHH9	274	GQLMFMNKYHGRKLS
P05155	216	ALKGFTTKGVTSVSQ	Q15431	161	GNEKVSLKLEEGIQE	Q9UHN6	1208	VFTSDPHKSYLPVQF
P05155	316	RMEPFHFKNSVIKVP	Q15431	339	QRSVSTQKALEEDLQ	Q9UHN6	1220	VQFQSPDKAETQRGD
P05155	321	HFKNSVIKVPMMNSK	Q15431	359	ICQLTEEKETQMEES	Q9UHQ9	130	PKFPEGGKMSQYLDS
P05155	328	KVPMMNSKKYPVAHF	Q15436	409	FGGTLEIKTSREIKI	Q9UHR5	142	IQKLYERKIKEGMDM
P05155	329	VPMMNSKKYPVAHFI	Q15464	187	SPKHRLIKVESAAGG	Q9UHV7	727	REAGKKHKVEDGTSS
P05155	341	HFIDQTLKAKVGQLQ	Q15493	106	NNRFNDGKVDPAGRY	Q9UHV7	808	SANGSDDKASCKESK
P05155	380	ALSPSVFKAIMEKLE	Q15528	38	DNFTEIIKTAKIEDE	Q9UHV7	812	SDDKASCKESKTGNL
P05155	385	VFKAIMEKLEMSKFQ	Q15528	41	TEIIKTAKIEDETQV	Q9UHW9	815	LAAEQTIKHLMEAEK
P05155	390	MEKLEMSKFQPTLLT	Q15542	440	KDSDKLDKIMNMKET	Q9UI12	30	AAEVRANKVNWQSYL
P05155	402	LLTLPRIKVTTSQDM	Q15545	154	RFRKTAKKKYIESPD	Q9UI26	351	PETLEAHKIKMAFFT
P05155	44	LQDRGEGKVATTVIS	Q15555	271	ERDFYFGKLREIELL	Q9UI32	253	PSGLRYNKLSLNEEG
P05155	487	VLWDQQHKFPVFMGR	Q15582	127	LYTDRTEKLRPEMEG	Q9UI32	284	LIKMDCNKAEKFDFV
P05156	117	GKFSVSLKHGNTDSE	Q15582	219	VNCARLLKADHHATN	Q9UI33	955	ELHQENKKPTSQRVQ
P05156	136	VKLVDQDKTMFICKS	Q15582	287	PTNEAFEKIPSETLN	Q9UIA9	312	SHLVDGVKRILENPQ
P05156	142	DKTMFICKSSWSMRE	Q15582	421	APLNSVFKDGTPPID	Q9UID6	56	DLKYFDNKDDDSDTE
P05156	19	CFHLRFCKVTYTSQE	Q15582	441	LLRNHIIKDQLASKY	Q9UIF8	1425	KAESVQIKEEMFETS
P05156	200	LAECTFTKRRTMGYQ	Q15582	447	IKDQLASKYLYHGQT	Q9UIF9	1405	PTGLGQPKRRGRPPS
P05156	239	GKYISQMKACDGIND	Q15582	53	PNVCAVQKVIGTNRK	Q9UIG0	131	VGKEKMLKVKIVKIH
P05156	31	SQEDLVEKKCLAKKY	Q15582	655	DSALEIFKQASAFSR	Q9UIG0	409	LKAKGRSKGILNGQK
P05156	405	DWIHPDLKRIVIEYV	Q15643	1280	SYEQNETKLKNFGQE	Q9UIG0	416	KGILNGQKSTGNSKS
P05156	506	YGNRFYEKEMECAGT	Q15643	840	KYSQALRKNEILRQT	Q9UIG0	422	QKSTGNSKSPKKGLK
P05160	109	SDVKLLYKIQENMRY	Q15648	1095	SVSSSGSKSHHSHSS	Q9UIG0	436	KTPKTKMKQMTLLDM
P05160	359	KIYYNGDKVTYACKS	Q15648	170	LPGDNKLKTKMYLAL	Q9UIG0	445	MTLLDMAKGTQKMTR
P05160	43	AQYYYTFKSFYFPMS	Q15648	172	GDNKLKTKMYLALQS	Q9UII4	316	AYVSDLGKVFSFGSG
P05160	90	PEPRCFKKCTKPDLS	Q15744	185	PPCSPLLKAPSPAGP	Q9UII4	324	VFSFGSGKDGQLGNG
P05165	104	DASSVHVKMADEAVC	Q15744	195	SPAGPLHKGKKAVNK	Q9UII5	319	SLKLTAHKKILMEEK
P05165	84	RVIRTCKKMGIKTVA	Q15744	197	AGPLHKGKKAVNKDS	Q9UIJ7	20	MGAPGSGKGTVSSRI
P05166	140	LSGAHAQKICKIMDQ	Q15746	521	PSFSSVLKDCAVIEG	Q9UIV1	200	YDVKYLMKSCKNLKG
P05452	36	KKIVNAKKDVVNTKM	Q15751	1877	EDGEEEEKKVDSSGE	Q9UIV1	203	KYLMKSCKNLKGGLQ
P05452	42	KKDVVNTKMFEELKS	Q15772	403	AGSRILDKLQFFEER	Q9UIV8	112	TNRLFGEKTYLFLQK
P05452	48	TKMFEELKSRLDTLA	Q15777	124	NHELTFDKEFMADLV	Q9UIX4	327	GAAAGRRKPGAGNSY
P05452	62	AQEVALLKEQQALQT	Q15825	194	DLLIIGSKVDMNDFW	Q9UIX4	337	AGNSYLDKVGLVLRV
P05452	73	ALQTVCLKGTKVHMK	Q15833	213	LAKLNAFKADTPSLG	Q9UJ04	147	GSQMIPGKKAKEVTT
P05543	141	LFIGKHLKPLAKFLN	Q15833	225	SLGEGPEKTRSQLLI	Q9UJ41	498	DIIEMDSKRVPRDKL
P05543	145	KHLKPLAKFLNDVKT	Q15833	381	GSDAEGEKIKDSMKL	Q9UJ71	5	***MTVEKEAPDAHF
P05543	182	SHVEMQTKGKVVGLI	Q15848	134	NMPIRFTKIFYNQQN	Q9UJC3	663	KFRDYEEKLIVSAWY
P05543	184	VEMQTKGKVVGLIQD	Q15849	513	PFPYRYRKPTVELLD	Q9UJC3	672	IVSAWYNKSLAFQKL
P05543	193	VGLIQDLKPNTIMVL	Q15849	531	MEESSEIKVETNISK	Q9UJV3	732	SPYVSGMKTCH****
P05543	218	ANPFDPSKTEDSSSF	Q15858	1929	RDDDLLNKKDMAFDN	Q9UJV9	455	IHEYLLLKGVEAVAI
P05543	229	SSSFLIDKTTTVQVP	Q15858	1979	DRTEKEDKGKDSKES	Q9UJX3	460	EDPVTQEKAKTLLDK
P05543	273	LALFVLPKEGQMESV	Q15878	1894	RQQLEEQKNAPMFQR	Q9UK17	350	EKGSSASKFTSIPAS
P05543	287	VEAAMSSKTLKKWNR	Q15916	68	QFLLTQSKHVRITIL	Q9UK17	376	GYGDMVPKTIAGKIF
P05543	298	KWNRLLQKGWVDLFV	Q16099	114	ISNICGEKEVPHFKV	Q9UK32	289	MNMILKAKLGMPQFL
P05543	345	LTEDNGLKLSNAAHK	Q16099	120	EKEVPHFKVAPEEFV	Q9UK32	309	SLLRMLFKRNPANRL
P05543	352	KLSNAAHKAVLHIGE	Q16099	205	RDPTPLLKEIRDDKT	Q9UK55	134	GLHLQALKPTKPGLL
P05543	360	AVLHIGEKGTEAAAV	Q16281	596	TEYPEAKKALEEKGR	Q9UK55	137	LQALKPTKPGLLPSL
P05546	132	RLNILNAKFAFNLYR	Q16478	781	RLEILKRKWWEGGRC	Q9UK55	146	GLLPSLFKGLRETLS
P05546	142	FNLYRVLKDQVNTFD	Q16513	928	WSALMDKKVKPPFIP	Q9UK55	211	LMNHYINKETRGKIP
P05546	228	VNDLYIQKQFPILLD	Q16534	262	IRASFLEKENSALRQ	Q9UK55	219	ETRGKIPKLFDEINP
P05546	237	FPILLDFKTKVREYY	Q16586	193	PLPIEGRKEGVYIKV	Q9UK55	241	DYILFKGKWLTPFDP
P05546	239	ILLDFKTKVREYYFA	Q16610	100	PAQLPAEKEVGPPLP	Q9UK55	265	LDKYKTIKVPMMYGA
P05546	261	SDPAFISKTNNHIMK	Q16610	234	TNRLECAKLVWEEAM	Q9UK55	274	PMMYGAGKFASTFDK
P05546	268	KTNNHIMKLTKGLIK	Q16635	37	TYSCFWTKYMNHLTV	Q9UK55	281	KFASTFDKNFRCHVL
P05546	271	NHIMKLTKGLIKDAL	Q16650	522	SYAAAGVKALPLQAA	Q9UK55	339	NMEVFFPKFKLDQKY
P05546	275	KLTKGLIKDALENID	Q16665	769	EQNGMEQKTIILIPS	Q9UK55	345	PKFKLDQKYEMHELL
P05546	302	FKGSWVNKFPVEMTH	Q16666	26	DYHFRMVKSLLSNDL	Q9UK55	77	ASRQQLAKETSNFGF
P05546	322	LNEREVVKVSMMQTK	Q16706	716	HIPPLGLKVYKILES	Q9UK61	403	VMSIDHLKQKIPPAL
P05546	367	PHKMSGMKTLEAQLT	Q16760	132	ILCADNRKEMEDWIA	Q9UKA2	480	MIGAKCKKLRTLDLW
P05546	396	TREVLLPKFKLEKNY	Q16787	2050	QEAAAQAKQANGLNQ	Q9UKA2	490	TLDLWRCKNITENGI
P05546	401	LPKFKLEKNYNLVES	Q16787	3000	PTSHLLFKLPQELLK	Q9UKA9	399	MNHLNGQKMYGKIIR
P05546	410	YNLVESLKLMGIRML	Q16798	270	FMQAVTDKFGINCLI	Q9UKD2	118	EVNEWFTKYTEMDYA
P05546	420	GIRMLFDKNGNMAGI	Q16825	10	LPFGLKLKRTRRYTV	Q9UKE5	67	GDEEEEIKQEINMLK
P05771	375	YAVKILKKDVVIQDD	Q16825	8	MPLPFGLKLKRTRRY	Q9UKG9	65	FQSGIGEKLHQKLLE
P05783	81	MGGIQNEKETMQSLN	Q16851	291	NKTRADVKGGTLTQY	Q9UKG9	69	IGEKLHQKLLERAKG
P05997	311	HKGLEGPKGEVGAPG	Q16890	70	HLVEIKQKLGMNLMN	Q9UKK3	36	DIKENGGKFSFSLNP
P06276	342	LELGQFKKTQILVGV	Q17R98	742	LLFQLSEKVSKEHNH	Q9UKN7	1338	YLAAMNQKREVMQQI
P06276	37	DDIIIATKNGKVRGM	Q17R98	981	LSDSANSKDDSDGSQ	Q9UKT4	282	SKVSTTWKKILEDDK
P06276	376	NNSIITRKEFQEGLK	Q17RD7	629	QDHWEEMKETKGQQI	Q9UKU0	306	GFLKVTEKVIFPRQD
P06276	383	KEFQEGLKIFFPGVS	Q17RD7	632	WEEMKETKGQQICRW	Q9UKV8	266	TKEIKGLKVEITHCG
P06276	527	VFKSTEQKYLTLNTE	Q1ED39	189	DTCSVGKKDEEQAAL	Q9UKV8	355	AGQRCIKKLTDNQTS
P06276	595	QFNDYTSKKESCVGL	Q1MX18	83	QRWMEDLKLMTECEC	Q9UKV8	381	DRQEEISKLMRSASF
P06310	75	SPRRLIYKVSNRDSG	Q29980	333	LCVPCCKKKTSAAEG	Q9UKV8	440	GVWDMRNKQFHTGIE
P06312	44	ERATINCKSSQSVLY	Q29RF7	1052	NSHAFMKKMAENIKL	Q9UKV8	608	PPAGDGKKPSIAAVV
P06396	162	ATFLGYFKSGLKYKK	Q29RF7	1058	KKMAENIKLTRDAQS	Q9UKV8	693	AIREACIKLEKDYQP
P06396	168	FKSGLKYKKGGVASG	Q2KHM9	623	AETSKRLKELEELKA	Q9UKV8	98	KPVFDGRKNLYTAMP
P06396	169	KSGLKYKKGGVASGF	Q2KHR2	160	KSHYIGTKSMAALTV	Q9UKX2	1489	SLGTELFKIKNAYEE
P06396	177	GGVASGFKHVVPNEV	Q2KHR2	176	AAAPAGMKGITQPSA	Q9UKX2	1491	GTELFKIKNAYEESL
P06396	239	SNRYERLKATQVSKG	Q2KHR2	198	NSFQPQVKTLPSPID	Q9UKX2	35	QNRPFDAKTSVFVAE
P06396	245	LKATQVSKGIRDNER	Q2KHR3	1378	KEALKTGKEPPAIWK	Q9UKX3	1244	SNIEALSKSKSNIER
P06396	277	MLQVLGPKPALPAGT	Q2KHR3	1393	VQKALLQKFVPEIRD	Q9UKX5	339	VTDEAALKDIVDALG
P06396	289	AGTEDTAKEDAANRK	Q2KHT3	199	TITLNVYKVSLDNQA	Q9UKX5	357	FSLEGTNKNETSFGL
P06396	302	RKLAKLYKVSNGAGT	Q2LD37	2868	QEFLTVVKCSIAKSQ	Q9UKY1	623	FTEKKKSKALKEEKM
P06396	338	CFILDHGKDGKIFVW	Q2M1K9	1267	DCSQCPQKFFFQTEL	Q9UKY1	641	ESNAGSSKEEAGETS
P06396	356	QANTEERKAALKTAS	Q2M2I5	194	GSGRDYSKYYSIIED	Q9UL40	269	KHKNQSPKTVASSLG
P06396	360	EERKAALKTASDFIT	Q2M3M2	620	APSRSWGKLLWSWFC	Q9UL45	120	AKLVNIRKEMLMLHE
P06396	368	TASDFITKMDYPKQT	Q2M3M2	642	QALSPAEKAALEQKL	Q9UL46	156	RVNAVKTKVEAFQTT
P06396	373	ITKMDYPKQTQVSVL	Q2NKJ3	343	MPSNSEDKKDPESLV	Q9UL51	537	IVNFNCRKLVASMPL
P06396	390	GGETPLFKQFFKNWR	Q2NKX8	300	PITRAREKDATPGEK	Q9UL51	594	GVVSVLTKGNKEMKL
P06396	394	PLFKQFFKNWRDPDQ	Q2PPJ7	476	SSESSGHKRSSSWGR	Q9UL51	597	SVLTKGNKEMKLSDG
P06396	457	WRIEGSNKVPVDPAT	Q2PPJ7	802	PQPIQENKGHVKREH	Q9UL54	11	GGRAGSLKDPDVAEL
P06396	530	QSRVVQGKEPAHLMS	Q2T9L4	172	FGAGPTVKSQLPQRT	Q9UL54	26	FFKDDPEKLFSDLRE
P06396	542	LMSLFGGKPMIIYKG	Q2TAC6	193	EVSTINAKEIMQLLM	Q9ULC3	168	VFKYLAEKYLQKLKQ
P06396	548	GKPMIIYKGGTSREG	Q2TAC6	201	EIMQLLMKGNRQRTQ	Q9ULC3	190	LTHSSSNKIGVFNTS
P06396	584	RAVEVLPKAGALNSN	Q2TAK8	173	CEKDPECKVDHKKGL	Q9ULC4	103	QVDKGAIKFVLSGAN
P06396	597	SNDAFVLKTPSAAYL	Q2TAL6	105	VSQGGGAKAGDLQVR	Q9ULC4	122	GLTSPGAKLYPAAVD
P06396	61	VEHPEFLKAGKEPGL	Q2TAL6	92	AGREPWSKLKQAWVS	Q9ULC4	139	VAIMAEGKQHALCVG
P06396	615	TGASEAEKTGAQELL	Q2TB90	557	RSVRMYNKIFAIPLE	Q9ULC5	376	PLKKFLLKLAVSSKF
P06396	728	TEALTSAKRYIETDP	Q2TB90	898	LSEDGSGKGAALITA	Q9ULC5	382	LKLAVSSKFKELQKG
P06396	75	LQIWRVEKFDLVPVP	Q2UY09	556	PKGDEGKKGSKGNQG	Q9ULC5	388	SKFKELQKGIIRHDS
P06400	847	GTSEKFQKINQMVCN	Q2VY69	195	SALCLHQKVHMGEKR	Q9ULC6	35	DIHSDVPKGANSFRV
P06401	171	LMSRSGCKVGDSSGT	Q2YD98	368	LKRAIDLKAELELVL	Q9ULD0	44	PATFPSSKGGGGSSY
P06401	183	SGTAAAHKVLPRGLS	Q2YD98	377	ELELVLRKYKELDIE	Q9ULD0	68	ENPQSVHKSWDSFFR
P06681	378	IILLTDGKSNMGGSP	Q32M45	39	QILPDGPKSDVDFSE	Q9ULD2	845	SSGSFYLKPLVSRAH
P06681	386	SNMGGSPKTAVDHIR	Q32M84	149	KRIIISLKINDPLVT	Q9ULD4	1120	VPPLDVLKLGEQKQA
P06681	443	AFILQDTKALHQVFE	Q32MH5	307	LYPGTGSKSDHGTSQ	Q9ULD5	174	QISSAVQKEQPLPTA
P06681	537	GKEFLIEKAVISPGF	Q32MH5	327	FSGIGDIKSQETSVR	Q9ULD5	198	AVQAVERKLEAQAMR
P06681	549	PGFDVFAKKNQGILE	Q32MK0	372	PAAAQPGKQGPPGTG	Q9ULD9	1210	MENHQLIKEAVEMKS
P06681	550	GFDVFAKKNQGILEF	Q32MQ0	399	QRDTEGSKMSPRAGS	Q9ULE6	536	LAYLTDAKRRLRKVV
P06681	566	GDDIALLKLAQKVKM	Q32MQ0	436	GLYDLSNKAASSALG	Q9ULH1	120	DLGTAFVKFSTLTKE
P06681	65	SPASRLCKSSGQWQT	Q32MZ4	90	RVEERPEKDFTEKGS	Q9ULI1	902	TLRSIKNKVTAFPGS
P06681	721	RKRAPRSKVPPPRDF	Q32P28	155	YLQVAYFKINKLEKA	Q9ULI1	927	PVVSSLPKLRHLLLE
P06702	38	TLNQGEFKELVRKDL	Q38SD2	1278	RFHIKKFKNFANVPA	Q9ULI3	227	RIAAFQTKSGTASEM
P06727	104	KLKEEIGKELEELRA	Q38SD2	1299	LRATDAMKNFSEFRQ	Q9ULI4	428	AATAAVPKMFAFDAV
P06727	123	HANEVSQKIGDNLRE	Q3B7T1	652	GGPEGLEKQMALFLD	Q9ULJ1	463	GQMESHLKELERVCD
P06727	187	RPHADELKAKIDQNV	Q3B7T1	660	QMALFLDKMGSLQKG	Q9ULJ3	872	PEDLSLSKQLKIQVK
P06727	189	HADELKAKIDQNVEE	Q3B7T1	666	DKMGSLQKGNYSSQS	Q9ULK0	440	RLQGLTLKVVTVLEE
P06727	198	DQNVEELKGRLTPYA	Q3B820	594	SKKGQSGKVLEYFNN	Q9ULK4	554	VIKLAHAKSSVALAP
P06727	209	TPYADEFKVKIDQTV	Q3B820	605	YFNNQETKSVTEDKE	Q9ULK4	582	EIESLGIKGFISQLL
P06727	211	YADEFKVKIDQTVEE	Q3KNS6	32	ELLQAVSKGPVMFRD	Q9ULK4	768	EEEYRKWKSMSNEND
P06727	233	YAQDTQEKLNHQLEG	Q3KR37	44	DGDTMVEKGSDHSSD	Q9ULK4	795	LFLCLLWKMLLETDH
P06727	246	EGLTFQMKKNAEELK	Q3L8U1	1885	KTDDSLEKYLYAFMS	Q9ULL5	452	KIKEVEEKQPEMKSG
P06727	247	GLTFQMKKNAEELKA	Q3L8U1	2850	KEEDSRIKDQEDKGG	Q9ULL8	308	PVVPLPQKEKLSLEP
P06727	287	GNTEGLQKSLAELGG	Q3MIN7	533	SAKLAREKSSSPSGS	Q9ULM0	271	PPHQPCMKLLTFRCS
P06727	316	PYGENFNKALVQQME	Q3MIT2	273	PCPPNSPKAVCAVLE	Q9ULM0	387	EEPPPAGKNEERESP
P06727	328	QMEQLRQKLGPHAGD	Q3MJ13	823	IKHLNILKLQGPISL	Q9ULQ0	275	KVLLLLWKVVMFTLG
P06727	345	GHLSFLEKDLRDKVN	Q3MJ13	855	LCNSGMIKDYSGVNL	Q9ULQ0	294	LQTLKVQKRAELGLP
P06727	350	LEKDLRDKVNSFFST	Q3MJ40	191	MNLTEREKMDTGVVL	Q9ULR0	259	EEALVRRKKMELLQK
P06727	359	NSFFSTFKEKESQDK	Q3MJ40	243	RLKGCENKQPQKTSQ	Q9ULR0	260	EALVRRKKMELLQKY
P06727	361	FFSTFKEKESQDKTL	Q3MJ40	247	CENKQPQKTSQEPEM	Q9ULU4	627	KEGCQMDKEPSAVKK
P06727	51	EAVEHLQKSELTQQL	Q3MJ40	441	EVVTVEMKEDQEFDL	Q9ULW0	217	TEEQELEKSMKMQQE
P06727	65	LNALFQDKLGEVNTY	Q3MJ40	452	EFDLQMTKNMNQNSD	Q9ULX3	198	ENGFEDRKDDSDDDG
P06727	78	TYAGDLQKKLVPFAT	Q3SXY8	387	PVGWGTPKVTRLPKL	Q9UM01	504	EDGGEMPKQRDPKSN
P06727	79	YAGDLQKKLVPFATE	Q3SXY8	64	KINLRQGKFEVTIFD	Q9UM01	509	MPKQRDPKSN*****
P06727	97	RLAKDSEKLKEEIGK	Q3SY89	29	TEPKKLEKYLQKLSA	Q9UM44	264	KVTWSRMKSGTFSVL
P06727	99	AKDSEKLKEEIGKEL	Q3SYG4	58	IFSPHPAKTGDGAQA	Q9UMD9	101	PGSTFERKTHVTRHA
P06732	358	QLVVDGVKLMVEMEK	Q3T8J9	242	QDNEESEKRRKKKKG	Q9UMN6	1718	EGINFKRKFLTGLEP
P06732	365	KLMVEMEKKLEKGQS	Q3T8J9	309	EHVVAMMKAAISETE	Q9UMQ3	23	KAARRRYKTFMIDEI
P06733	89	LNVTEQEKIDKLMIE	Q3T8J9	324	DMPMFEPKMTRSKLK	Q9UMQ3	33	MIDEILSKETCDYFE
P06744	252	ALSTNTTKVKEFGID	Q3T906	640	VDTREGPKLNSTAQK	Q9UMR7	13	TYAEVRFKNEFKSSG
P06744	466	LERLLPHKVFEGNRP	Q3V5L5	275	AAQRLAQKLGATQRD	Q9UMS5	309	GCEVKNRKSILSRHL
P06753	113	RLATALQKLEEAEKA	Q3V5L5	73	ESRGVLRKMSDLLEL	Q9UMS5	417	SGTKRDPKEDVFQQN
P06753	129	DESERGMKVIENRAL	Q3V5L5	83	DLLELMVKRMDALAR	Q9UMS6	480	KKLNRGDKMEMLPDT
P06753	137	VIENRALKDEEKMEL	Q3YEC7	138	AEFLDVYKNCNGVVM	Q9UMS6	497	KGALMFAKRRERMDQ
P06753	153	EIQLKEAKHIAEEAD	Q460N5	1296	GGGFLRCKNIIHVIG	Q9UMZ2	609	QKQQTQVKNPLNLAD
P06753	162	IAEEADRKYEEVARK	Q460N5	1320	SVLQECEKKNYSSIC	Q9UMZ2	629	SVNCSSEKPLSFSAV
P06753	169	KYEEVARKLVIIEGD	Q460N5	1321	VLQECEKKNYSSICL	Q9UNA1	375	EPVYNSNKDSQSEGT
P06753	206	KNVTNNLKSLEAQAE	Q496Y0	412	SPKAASSKTGKCQEK	Q9UNQ0	72	SNINGIMKPGLNAIL
P06753	227	DKYEEEIKILTDKLK	Q49AJ0	1178	LDFLMSEKNQMDTFA	Q9UNU6	91	LSFGSILKDTQRKLD
P06865	382	EVFDNKVKIQPDTII	Q49AM3	171	VAEEERMKQKAEKKR	Q9UNW1	349	DIFQHLDKAVEQKQR
P06899	35	KKRKRSRKESYSIYV	Q4FZB7	778	GSSSTKLKIQLKRDE	Q9UNW1	387	LMGYFKDKEPLTAYN
P07195	119	QRNVNVFKFIIPQIV	Q4FZB7	782	TKLKIQLKRDEENRG	Q9UNW1	50	LSPYFGTKTRYEDVN
P07195	329	DTLWDIQKDLKDL**	Q4G0J3	396	KEYLALQKASMASLK	Q9UNW1	97	GTRYPTVKQIRKLRQ
P07195	60	DVLEDKLKGEMMDLQ	Q4G0J3	403	KASMASLKKTISQIK	Q9UNY4	509	PVGSLELKSACQVTA
P07195	82	TPKIVADKDYSVTAN	Q4G0J3	404	ASMASLKKTISQIKS	Q9UNZ5	60	LEVGIRKKIEHDVVM
P07196	379	YQDLLNVKMALDIEI	Q4G0P3	1781	GVLDPGEKSNVQVKF	Q9UNZ5	75	KASSSLPKKLALLKA
P07197	451	PKLKVQHKFVEEIIE	Q4G0P3	2274	AQDYAAMKAQEKAKK	Q9UNZ5	76	ASSSLPKKLALLKAP
P07197	632	KGKSPVPKSPVEEKG	Q4G0X9	23	GSASEGEKEGNNESH	Q9UP83	833	IMVQLLQKAMSALQ*
P07197	645	KGKSPVPKSPVEEKG	Q4G0Z9	542	FTTEDFEKLLAFAKN	Q9UP95	1010	FRELVHIKPDQSNVR
P07197	658	KGKSPVPKSPVEEKG	Q4JDL3	117	PLLSDTRKIVSEGEL	Q9UP95	1024	RRMHTAVKLNEVIVT
P07205	41	ITNNQRIKASIPSIK	Q4L180	572	DDLKNKLKAEEEKGN	Q9UPA5	349	TQEGLTGKLFGLGAS
P07225	138	YMSCKDGKASFTCTC	Q4LE39	887	NGLEEKRKSLRTTGF	Q9UPN3	1702	ESYLRTSKNLIDPNT
P07225	274	CDGKKGFKLAQDQKS	Q4U2R8	321	QKELTMGKGQASAME	Q9UPN3	3948	FVTISGQKVLDMENS
P07225	364	GKIEVQLKNEHTSKI	Q4V348	789	YECDECGKTFVRKAA	Q9UPN3	7074	IDGILASKFPTTKLE
P07225	401	SISIKIAKEAVMDIN	Q4VCS5	763	IEKDAMIKVLQQRSR	Q9UPN4	353	KRALRAQKASTAERG
P07225	424	ENGLLETKVYFAGFP	Q502W6	765	DQKVQKKKVLHAEST	Q9UPP5	1142	SSIDSSRKNKQSVSA
P07225	433	YFAGFPRKVESELIK	Q52LC2	193	PAHFSQLKARDTAEE	Q9UPP5	1144	IDSSRKNKQSVSATE
P07225	464	KQGASGIKEIIQEKQ	Q52LC2	201	ARDTAEEKELLRSQG	Q9UPR0	571	KILIKAKKLSSNCSG
P07225	470	IKEIIQEKQNKHCLV	Q52LW3	1224	GQATGQPKEDSEELG	Q9UPR0	598	EMSQRMGKENMEQPN
P07225	591	LELSTPLKIETISHE	Q53FD0	265	NENGELQKIILPRSR	Q9UPR5	278	GAEGDPPKSIELDGT
P07225	609	RQLAVLDKAMKAKVA	Q53G44	389	SRVMNVHKMLGIPIS	Q9UPR5	329	LKQKHPDKDLEQLVG
P07237	366	ELPEDWDKQPVKVLV	Q53GQ0	64	GSTDGIGKSYAEELA	Q9UPT5	240	GLKEHFHKSSSSSGV
P07237	415	DKLGETYKDHENIVI	Q53GQ0	72	SYAEELAKHGMKVVL	Q9UPT8	1292	ASLKDVFKGFDPTAS
P07237	444	VHSFPTLKFFPASAD	Q53GS7	204	EALGHQEKLKAEHRH	Q9UPT8	851	LGDPRLQKGHPTGSR
P07237	71	AKAAGKLKAEGSEIR	Q53GS7	206	LGHQEKLKAEHRHRA	Q9UPT8	916	PVGPSSSKGSGPPPT
P07237	81	GSEIRLAKVDATEES	Q53H96	218	QTLLGTAKMLLHEGQ	Q9UPU3	1030	KDIGNVIKRALVKVT
P07306	103	GNVGRKMKSLESQLE	Q53HI1	71	YRNFHYRKQTKDQWA	Q9UPU3	1035	VIKRALVKVTSVPED
P07333	168	GFTIHRAKFIQSQDY	Q53HI1	74	FHYRKQTKDQWARDD	Q9UPU3	499	LYEVAGIKGIFLANK
P07333	197	SIRLKVQKVIPGPPA	Q53LP3	217	MGSSPQLKRSVCPGG	Q9UPV0	299	SLSSAVGKGRQGSGA
P07333	33	SVPELVVKPGATVTL	Q53S48	300	QWGPIFLKVLPGGIL	Q9UPV9	482	LGNDERSKKPGTPGT
P07357	204	LYYGDDEKYFRKPYN	Q53S48	8	MCSTNPGKWVTFDDD	Q9UPV9	483	GNDERSKKPGTPGTP
P07357	214	RKPYNFLKYHFEALA	Q569H4	105	QANAPLIKPPAHPSA	Q9UPW8	1238	QYADIISKDFASYCS
P07357	239	NANDLLSKVKKDKSD	Q569H4	94	TTASSLEKIKVQANA	Q9UPX6	280	SLVGPISKAENEHRE
P07357	241	NDLLSKVKKDKSDSF	Q569H4	96	ASSLEKIKVQANAPL	Q9UPX6	629	QVLGKLNKLDQKMQQ
P07357	242	DLLSKVKKDKSDSFG	Q58EX2	1971	TDSGNSAKSGALGHS	Q9UQ52	913	PPANIAWKLTNSKLC
P07357	295	IFTRIFTKVQTAHFK	Q58FF6	467	IMEESNVKFENLCRL	Q9UQ53	326	ILMFYRDKPIDWLLD
P07357	361	ILVIDKAKMESLGIT	Q58FF7	183	RVKEVVKKHSQFIGY	Q9UQ53	345	VKVCNPEKDAKHCDR
P07357	412	GKTERARKAMAVEDI	Q58FF7	202	YLEKEQDKEISDDEA	Q9UQD0	482	RSSSEISKLSSKSAK
P07357	479	SLGPLEAKRQNLRRA	Q58G82	148	NKSSMRRKMIGWIYL	Q9UQD0	486	EISKLSSKSAKERRN
P07358	212	ILNTRFRKPYNVESY	Q58G82	171	LNHWTEMKESKGRQV	Q9UQD0	489	KLSSKSAKERRNRRK
P07358	226	YTPQTQGKYEFILKE	Q5EBL2	573	HACGVCGKSFAQTSN	Q9UQE7	180	EESISLMKETEGKRE
P07358	251	VTEKMASKSGFSFGF	Q5FVE4	344	KSMGLKKKAFVWARN	Q9UQE7	571	DSDEVSTKILMEFNK
P07358	289	TKRFSHTKSVFLHAR	Q5FVE4	355	WARNIGFKVNSKKML	Q9UQF0	494	MEPKMQSKTKIYRRP
P07358	305	DLEVAHYKLKPRSLM	Q5FVE4	359	IGFKVNSKKMLGKYN	Q9UQF0	496	PKMQSKTKIYRRPLD
P07358	380	NNVHACAKNDFKIGG	Q5FWF4	140	GLLTADAKTLIDALN	Q9UQL6	194	LQEFLLSKSKEPTPG
P07358	411	RGILNEIKDRNKRDT	Q5FWF4	362	TEAVIENKTRYIRID	Q9UQL6	196	EFLLSKSKEPTPGGL
P07358	466	NPAIIKVKVEPLYEL	Q5FWF5	398	WTKIKLSKFNSVQHN	Q9XRX5	11	ACYKQPLKPSGSEPP
P07358	490	STVRQNMKQALEEFQ	Q5GAN6	128	DMMAHKMKEPSQSCI	Q9Y217	44	LFIDSHQKETWILHH
P07359	148	ELQELYLKGNELKTL	Q5GFL6	64	DGSNSVGKGSFERSK	Q9Y217	467	FLLEDQKKYLNPLYS
P07359	165	GLLTPTPKLEKLSLA	Q5H9R7	474	CIVHSTDKGPNSALV	Q9Y217	493	NTVSFNFKFWRNMYH
P07360	184	DQIFYFPKYGFCEAA	Q5H9T9	224	SFTQETKKGPPVLLE	Q9Y219	476	CQHGGTCKDLVNGYQ
P07384	280	AYSVTGAKQVNYRGQ	Q5H9U9	1266	FVEILFVKGLIRVVT	Q9Y234	131	YDRMENLKLIVRALN
P07451	224	VSSDQMAKLRSLLSS	Q5H9U9	460	EFVGDMMKDLPILKS	Q9Y250	61	KSSSKMGKSEDFFYI
P07451	64	KTILNNGKTCRVVFD	Q5HY64	115	SPAQPARKAFVEEVE	Q9Y265	171	AKGTKQLKLDPSIFE
P07492	91	LLGLIEAKENRNHQP	Q5HYC2	2045	HLDPPVKKLLVSPEG	Q9Y265	182	SIFESLQKERVEAGD
P07585	147	QLKELPEKMPKTLQE	Q5JNZ3	190	EVCVQDVKLENQWET	Q9Y271	162	SSPFLMAKPQKDEKN
P07585	150	ELPEKMPKTLQELRA	Q5JPF3	594	EKATSDDKDSVSNIA	Q9Y274	100	YFRLALSKLQSCDLF
P07737	105	TFNVTVTKTDKTLVL	Q5JPF3	605	SNIATEIKEGPISGT	Q9Y279	252	TTMTYPLKATSTVKQ
P07737	108	VTVTKTDKTLVLLMG	Q5JRA6	1233	ENTELVQKLSNYEQK	Q9Y279	258	LKATSTVKQSWDWTT
P07737	126	VHGGLINKKCYEMAS	Q5JRA6	1284	EILDDTAKNLRVMLE	Q9Y281	19	IKVFNDMKVRKSSTQ
P07737	54	EVGVLVGKDRSSFYV	Q5JRA6	1760	GKVNMAPKGPPPFPG	Q9Y283	1047	LENSGRSKNFSYNLQ
P07737	91	FSMDLRTKSTGGAPT	Q5JRX3	550	ELRSQQSKPQDASCL	Q9Y283	1060	LQSATQPKNKTKP**
P07738	159	LPRSESLKDVLERLL	Q5JRX3	561	ASCLPALKVSDIEPT	Q9Y283	374	SGHVSTVKLLLENNA
P07738	18	HGEGAWNKENRFCSW	Q5JS13	339	PPVPRHRKSHSLGNN	Q9Y285	101	LMRLPSGKVGFSKAM
P07738	181	APEVLRGKTILISAH	Q5JSZ5	1530	GEQGEAMKQFDLNYG	Q9Y285	343	LYRLAQKKPFTPVKY
P07738	197	NSSRALLKHLEGISD	Q5JTW2	63	APLLSTLKINKDLPL	Q9Y2C4	210	QTRGDGKKIVSYQVI
P07738	3	*****MSKYKLIMLR	Q5JUW0	97	DEQIDHYKESQDKLP	Q9Y2C4	230	AVPSHLYKVILARRS
P07738	43	EEARNCGKQLKALNF	Q5JV73	1511	LPEEVYRKPAELDED	Q9Y2E6	482	TGTQPPGKMEYHLIP
P07738	5	***MSKYKLIMLRHG	Q5JVG2	615	YECSICGKSFTKKSQ	Q9Y2E6	499	LPGHPDCKTIRIIYS
P07766	37	GITQTPYKVSISGTT	Q5JWF2	981	DPRVTRAKYFIRDEF	Q9Y2G3	556	SEETMEVKTLGKLER
P07900	585	ILEKKVEKVVVSNRL	Q5JX69	101	PFRTPLKKNQNASLY	Q9Y2G3	560	MEVKTLGKLERYKLL
P07900	631	TMGYMAAKKHLEINP	Q5JY77	638	SKSSLEDKEEAMIPC	Q9Y2G3	623	HVDEFALKGLRTLCI
P07911	420	IIRDLNIKINFACSY	Q5JY77	649	MIPCFGAKEEVSMKH	Q9Y2H2	774	QGSLAQGKNFLMSKF
P07942	1226	TVDSVERKVSEIKDI	Q5K4L6	66	LLPLLLLKLHLWPQL	Q9Y2H6	677	LQGRPKAKEIQLRWG
P07942	1231	ERKVSEIKDILAQSP	Q5KU26	466	PPGPTGNKGQKGEKG	Q9Y2H8	654	QRTHSGEKSYECNEY
P07942	229	PRIQNLLKITNLRIK	Q5QJ74	44	TPQGSPMKDRLNLPS	Q9Y2H8	666	NEYGKLCKKSTLSLY
P07948	338	LKSDEGGKVLLPKLI	Q5QJ74	67	ITCAGDEKEIAAFCA	Q9Y2H9	537	LYEGHIEKDAREFLD
P07951	220	KYSTKEDKYEEEIKL	Q5R372	159	LRAMATMKSSSQYPF	Q9Y2I1	230	EISHCDAKHIRGLVA
P07954	311	PFVTAPNKFEALAAH	Q5R372	780	MEQACNIKVPTKKLK	Q9Y2I7	1753	FFRGTAGKSPDLSSQ
P07996	110	TLLALERKDHSGQVF	Q5R372	787	KVPTKKLKKYEKEYQ	Q9Y2I7	1761	SPDLSSQKRETLRGA
P07996	201	IARLRIAKGGVNDNF	Q5S007	486	IMAAVVPKILTVMKR	Q9Y2K1	528	IQKKQLFKHSACPFR
P07996	300	TLQDSIRKVTEENKE	Q5SR53	143	HHSVKAPKEDQAQEA	Q9Y2K5	346	SMRPPVTKASSFSGI
P07996	50	GSGRRLVKGPDPSSP	Q5SRD0	293	PEPRFEHKVSNIFDD	Q9Y2K7	476	ESLPLHKKCVPTGIE
P07996	74	IPPVPDDKFQDLVDA	Q5SRE5	574	PIIDLVHKVISTDLS	Q9Y2K9	1107	FGEASAGKASRSLAQ
P07996	86	VDAVRAEKGFLLLAS	Q5SRN2	76	YDNRERSKRDYTPST	Q9Y2K9	1126	PGSIEGMKGAAGGVM
P07998	90	QNVCFQEKVTCKNGQ	Q5SRN2	92	SLVSMASKFSLGQTE	Q9Y2K9	826	SSISSIDKDSKEAIT
P08123	1023	PRGLPGLKGHNGLQG	Q5SSJ5	330	SGTFQLKKSGEKPLL	Q9Y2Q0	922	CRKENMLKYPELYKT
P08123	621	PPGPDGNKGEPGVVG	Q5SSJ5	357	IAAMNEPKTCSTTAL	Q9Y2Q3	116	EHPEMLEKASRELWM
P08123	738	AAGQPGAKGERGAKG	Q5ST30	79	SIKAWRPKELVLYEI	Q9Y2Q3	144	SILAAAEKAGMSAEQ
P08133	598	VAIVQSVKNKPLFFA	Q5SW79	522	EARKMIDKVFGVDDN	Q9Y2S0	15	ERKISGLKTSMAEGE
P08172	264	HNKIQNGKAPRDPVT	Q5SW79	895	MDTTLILKDTEAVMA	Q9Y2S7	223	TLRAWQEKNHPWLEL
P08172	280	NCVQGEEKESSNDST	Q5SXH7	37	FSSVTSWKKRFFILS	Q9Y2W1	314	GSLSPSKKSPVGKSP
P08174	142	REPSLSPKLTCLQNL	Q5SXH7	5	***MAGGKQFTFSYE	Q9Y2W1	333	STYGSSQKEESAASG
P08174	76	FVKIPGEKDSVICLK	Q5SYB0	333	ISLKYIEKDWGIENF	Q9Y2W2	266	PEDMDQDKHDDSTDD
P08183	519	FIMKLPHKFDTLVGE	Q5SYB0	350	PTLLRNMKGKDIKKA	Q9Y2X0	276	TDLNRKDKFPAITHL
P08253	639	FKGAYYLKLENQSLK	Q5SZJ8	215	THSLTGAKSSTSRDK	Q9Y2X3	485	EEEETSVKKKKKRGK
P08294	229	AREHSERKKRRRESE	Q5SZK8	1427	VFPDVISKGVSLKEG	Q9Y2X9	2	******MKIGSGFLS
P08294	230	REHSERKKRRRESEC	Q5SZL2	537	QLQILEEKNKNLQEA	Q9Y3A3	193	FLCHRFTKFVMKYNL
P08567	134	GALYLSMKDTEKGIK	Q5T0U0	145	SLGEVESKWSFMTEL	Q9Y3A3	197	RFTKFVMKYNLMSKD
P08567	45	KKSDNSPKGMIPLKG	Q5T0U0	155	FMTELHEKRDFVKKL	Q9Y3A5	248	DVEEGDEKFE*****
P08567	70	GKRMFVFKITTTKQQ	Q5T160	71	QAKRLAEKLRCDTVV	Q9Y3A6	169	SIKSRLSKSGHIQTL
P08567	75	VFKITTTKQQDHFFQ	Q5T1C6	237	FIKLNPAKSLT****	Q9Y3D6	120	LIDKAMKKDGLVGMA
P08571	119	VLAYSRLKELTLEDL	Q5T1J6	30	RHFSAPQKLHADCEK	Q9Y3P9	460	FLKLKQIKQRERKNN
P08572	1346	VFGLPGEKGPRGEQG	Q5T1M5	870	IKELEKNKSQMSGVE	Q9Y3P9	880	DLDNAEEKADALNKE
P08572	57	GCQCYPEKGGRGQPG	Q5T1Q4	305	SFMPVVIKKTSATSV	Q9Y3P9	965	EIEKIRQKVDDCERC
P08575	1200	VDIFQVVKALRKARP	Q5T1R4	1645	NLPGVSTKAALSLLR	Q9Y3R5	1655	VDLLGATKGSSSVYF
P08603	1066	IVSRQMSKYPSGERV	Q5T1V6	324	YRLQQHVKVIIATPG	Q9Y3R5	1743	HLVKEVVKRPPQVKG
P08603	1202	ESVEFVCKRGYRLSS	Q5T3I0	121	TLTSGGEKPNKDLES	Q9Y3R5	405	DALGSDLKLSYTQSG
P08603	156	VTAPENGKIVSSAME	Q5T3J3	308	TPSLVPVKSSNNVAS	Q9Y3R5	836	LVIEDKMKRYKSSGH
P08603	224	NGSPISQKIIYKENE	Q5T3J3	319	NVASKILKTFVDRKN	Q9Y3R5	839	EDKMKRYKSSGHNPF
P08603	228	ISQKIIYKENERFQY	Q5T4B2	486	LRLAGARKLLASQPL	Q9Y3R5	849	GHNPFFGKLQMVTVP
P08603	388	PAVPCLRKCYFPYLE	Q5T4D3	490	KVHYNIGKNLADKGN	Q9Y421	45	LEAMGTSKKNEEEKR
P08603	410	GRKFVQGKSIDVACH	Q5T4D3	495	IGKNLADKGNQTAAI	Q9Y450	273	IGHVDAGKSTLMGHM
P08603	478	EKAKYQCKLGYVTAD	Q5T4S7	1696	GVCTVCAKVCHKDHE	Q9Y463	119	EIDSLIGKGSFGQVV
P08603	496	SGSITCGKDGWSAQP	Q5T4S7	2399	EEALQADKKLNLFIG	Q9Y487	113	VELREVTKNKEKLRK
P08603	588	DRKKDQYKVGEVLKF	Q5T4S7	2400	EALQADKKLNLFIGA	Q9Y487	290	YLRQVLCKAAESVYS
P08603	646	GNVKEKTKEEYGHSE	Q5T5U3	1761	EKQEPTWKTKIADRL	Q9Y487	303	YSRVIQVKKMKAIYH
P08603	68	NVIMVCRKGEWVALN	Q5T5U3	1763	QEPTWKTKIADRLKL	Q9Y487	304	SRVIQVKKMKAIYHM
P08603	749	PQCVAIDKLKKCKSS	Q5T5U3	921	SEDSGSRKDSSSEVF	Q9Y490	1730	EASQLGHKVSQMAQY
P08603	754	IDKLKKCKSSNLIIL	Q5T5U3	933	EVFSDAAKEGWLHFR	Q9Y490	1766	MALLDQTKTLAESAL
P08603	766	IILEEHLKNKKEFDH	Q5T6C5	54	EESSKNTKKLDAMTL	Q9Y490	1780	LQLLYTAKEAGGNPK
P08603	768	LEEHLKNKKEFDHNS	Q5T6C5	55	ESSKNTKKLDAMTLI	Q9Y490	1960	CARRVSEKVSHVLAA
P08603	769	EEHLKNKKEFDHNSN	Q5T7N2	228	KNKEEVLKASREEKV	Q9Y490	2024	EGILKTAKVLVEDTK
P08603	854	EGEEITCKDGRWQSI	Q5T7N2	258	SATLDISKQWSNVFN	Q9Y490	2089	NAVKDVAKALGDLIS
P08637	149	LQNGKGRKYFHHNSD	Q5T7N2	571	MSHDEHKKHSHTNLS	Q9Y490	2180	EDFIRMTKGITMATA
P08651	326	GGISSPVKKTEMDKS	Q5T7N2	84	LKAVLGGKATIPEVK	Q9Y490	2423	QGHASQEKLISSAKQ
P08670	139	LAELEQLKGQGKSRL	Q5T7W7	26	RFSDLDLKDMSLINP	Q9Y490	2429	EKLISSAKQVAASTA
P08670	143	EQLKGQGKSRLGDLY	Q5T9S5	724	QVSEETIKVRQLDSA	Q9Y490	2464	QAAGNAVKRASDNLV
P08670	168	VDQLTNDKARVEVER	Q5T9Z0	57	GGMVLMRKQVPSRFM	Q9Y490	256	PHNEQKHKAGFLDLK
P08670	262	QIDVDVSKPDLTAAL	Q5TA45	462	GISLGLLKREMAQGL	Q9Y490	263	KAGFLDLKDFLPKEY
P08670	313	NDALRQAKQESTEYR	Q5TA77	15	QQCQPLPKCPSPKCP	Q9Y490	592	TEMSRGVKLLAALLE
P08670	445	SKRTLLIKTVETRDG	Q5TA77	24	PSPKCPPKSSAQCLP	Q9Y490	66	GIWLEAGKALDYYML
P08697	170	AARMYLQKGFPIKED	Q5TAP6	208	PLLTPMEKASLQAMS	Q9Y490	786	NELLQHVKAHATGAG
P08697	175	LQKGFPIKEDFLEQS	Q5TAX3	1136	LYFLQQRKPPVIPVL	Q9Y490	861	RKLLSAAKILADATA
P08697	189	SEQLFGAKPVSLTGK	Q5TAX3	56	SPNRNSSKKNKQNDI	Q9Y490	869	ILADATAKMVEAAKG
P08697	244	FQGFWRNKFDPSLTQ	Q5TAX3	57	PNRNSSKKNKQNDIC	Q9Y490	875	AKMVEAAKGAAAHPD
P08697	445	PSAPRELKEQQDSPG	Q5TAX3	59	RNSSKKNKQNDICIE	Q9Y490	910	AAAQNAIKKKLVQRL
P08697	454	QQDSPGNKDFLQSLK	Q5TB80	467	SQDDKINKTYRSQLS	Q9Y490	98	RMLDGTVKTIMVDDS
P08697	461	KDFLQSLKGFPRGDK	Q5TB80	484	EEGAVMGKQVPYKKA	Q9Y493	2004	DAQVTLQKGHRVLIN
P08697	468	KGFPRGDKLFGPDLK	Q5TCS8	641	VDNCPIVKELWMALI	Q9Y4A0	51	DIRKNKEKIITYASS
P08697	51	VSPLTLLKLGNQEPG	Q5TD94	651	FYIGWGHKYSPDNYT	Q9Y4A5	932	TVEFSDCKASLQLPM
P08697	64	PGGQTALKSPPGVCS	Q5TEA6	525	AFILESKKANILEKE	Q9Y4A5	941	SLQLPMEKAIETALD
P08708	49	PSKKLRNKIAGYVTH	Q5TEJ8	511	WLDLTVVKAKGQPDL	Q9Y4B4	311	AHSMGLGKTLQVISF
P08758	70	RDLLDDLKSELTGKF	Q5TEJ8	513	DLTVVKAKGQPDLPE	Q9Y4B4	665	PPQGTKGKGEDSTLA
P08F94	1018	EDLFLNVKPRLDMVE	Q5TGI4	168	EYLMNWPKSSQSR**	Q9Y4B5	1195	LEEKTENKLGELGSS
P08F94	3938	RMKVMLGKVNQCPHQ	Q5TH69	1404	RCSQLLAKIYKMPLK	Q9Y4B5	1210	AESKGALKKEREVHQ
P09104	239	DKAGYTEKIVIGMDV	Q5THJ4	1703	KPSSLAQKEYLSQSC	Q9Y4B6	1224	PDLANNYKRNCATFN
P09104	256	SEFYRDGKYDLDFKS	Q5THJ4	195	PVQKLMRKKQLDVAE	Q9Y4C1	261	SARIGAVKRKSSENN
P09172	248	FSRHHIIKYEPIVTK	Q5THJ4	2057	GKLKVKNKFLFAGFP	Q9Y4C1	608	GLWLPLTKNVVGIDL
P09172	514	VDAGFLQKYFHLINR	Q5THK1	534	VEPNILSKSFYTKDC	Q9Y4C8	203	EPKAAVQKELSDMDY
P09172	616	VVSIGGGKG******	Q5TZA2	1390	HARGLELKLEAARAE	Q9Y4D1	480	CDAKTQEKEEMMQTL
P09172	82	QLLVRRLKAGVLFGM	Q5U5R9	595	QEEFGIIKSYNLKPG	Q9Y4D1	793	RVAEVKPKVEAIRSG
P09326	151	MDDNCYLKLSCVIPG	Q5U5R9	600	IIKSYNLKPGGDKIS	Q9Y4D1	894	VNMTELDKEISTLRS
P09327	195	LRGMTLAKEIRDQER	Q5UIP0	1591	DQEEKVVKQECIKAE	Q9Y4D8	2276	FRNEAERKSGLDQIK
P09467	330	DDVLEFLKVYEKHSA	Q5VST9	2515	LSPSEKFKMSLEGQM	Q9Y4E5	322	VKCVACHKTLRSHME
P09493	217	QAEKYSQKEDRYEEE	Q5VST9	3700	EYLCMCGKERTSAML	Q9Y4F3	73	SPLHAGSKLFPAVPL
P09543	204	KSSETLRKAGQVFLE	Q5VST9	6903	ARRRHLLKGGYIAGA	Q9Y4F5	1081	GRLGSRRKPAAPPPS
P09601	204	QRVIEEAKTAFLLNI	Q5VST9	7110	ISLPGRPKPGPCSSP	Q9Y4F5	1486	ENEVPILKTSNKEIS
P09601	48	QVTRDGFKLVMASLY	Q5VT06	2667	QISSKENKDLISDAT	Q9Y4F5	1490	PILKTSNKEISSILK
P09601	69	EEEIERNKESPVFAP	Q5VT25	716	GIHANEIKNLKKELH	Q9Y4G6	406	IDIILKKKQSKDRFG
P09630	221	TADSLGGKEEKREET	Q5VT25	720	NEIKNLKKELHDSEG	Q9Y4G8	244	QVEKNMQKVEEEGEI
P09871	105	EFQVPYNKLQVIFKS	Q5VT25	734	GQQLALNKEIMILKD	Q9Y4I1	1107	TLMVHVPKPGHKRTD
P09871	210	EYQIRLEKGFQVVVT	Q5VT52	468	SSLTSVMKNTGVSPA	Q9Y4I1	1480	FQGMLEYKKEDEQKL
P09871	280	QTDLTGQKKGWKLRY	Q5VT52	494	SNLTSGLKTPAPATT	Q9Y4I1	1481	QGMLEYKKEDEQKLV
P09871	501	TSRLAKSKMLTPEHV	Q5VT97	919	AVLDAMAKSPLKMSS	Q9Y4I1	1486	YKKEDEQKLVKNLIL
P09871	602	CKEVKVEKPTADAEA	Q5VT97	923	AMAKSPLKMSSNGCE	Q9Y4I5	434	SHYLPPTKFSGLPRF
P09871	629	EKGMDSCKGDSGGAF	Q5VTH9	93	QSRMAVSKTVLIPPE	Q9Y4K3	319	QIRELTAKMETQSMY
P09871	677	NYVDWIMKTMQENST	Q5VTJ3	286	EGVEPRLKGKVYDYY	Q9Y4K4	748	VCLDKFVKIVNLQGK
P09960	58	RSLVLDTKDLTIEKV	Q5VTJ3	288	VEPRLKGKVYDYYVE	Q9Y4L1	106	YFQHLLGKQADNPHV
P09960	64	TKDLTIEKVVINGQE	Q5VTL8	105	PWEKGSRKTAGQTGM	Q9Y4L1	889	EKPVLLSKDIEAKMM
P09972	111	VVGIKVDKGVVPLAG	Q5VTM2	91	FKHNKQLKKTKKRLK	Q9Y4P9	119	EERQRRRKQGAGSLQ
P0C0L4	1030	AASRYLDKTEQWSTL	Q5VTR2	856	AQLELAQKKLHDFQD	Q9Y530	146	VFEATDIKITVYTL*
P0C0L4	1042	STLPPETKDHAVDLI	Q5VTR2	914	EILMEEIKDYKARLT	Q9Y587	53	QCSFIEYKDFKLIYR
P0C0L4	1051	HAVDLIQKGYMRIQQ	Q5VTT5	730	PKRRGGGKILGYFLD	Q9Y5A6	248	CVNLENEKGTKPPLQ
P0C0L4	1099	QVGGSPEKLQETSNW	Q5VU43	1266	SLVKQDSKQIQVDLQ	Q9Y5A7	198	RGLEILAKRAAETVV
P0C0L4	1174	RVEASISKANSFLGE	Q5VU57	107	IVNFSKTKSLYRDGM	Q9Y5B6	123	NEEVFKVKKSSYSKK
P0C0L4	118	VAHSPWLKDSLSRTT	Q5VU57	41	GYCGQPKKGHLIFDA	Q9Y5B6	124	EEVFKVKKSSYSKKI
P0C0L4	1340	STGRNGFKSHALQLN	Q5VU57	467	EVQRRKEKSPPYKHP	Q9Y5B6	129	VKKSSYSKKIVKLLK
P0C0L4	1365	LQFSLGSKINVKVGG	Q5VU65	1708	SELVLSHKQDIGEIR	Q9Y5E1	136	HSPVFRHKEMVLKIS
P0C0L4	1369	LGSKINVKVGGNSKG	Q5VU69	20	FQKAMGLKKTVDRWR	Q9Y5F9	297	HMFSLDEKTGMIKNN
P0C0L4	1375	VKVGGNSKGTLKVLR	Q5VU69	21	QKAMGLKKTVDRWRN	Q9Y5F9	302	DEKTGMIKNNQSFDF
P0C0L4	1379	GNSKGTLKVLRTYNV	Q5VU97	1092	VITLNMIKSAPVGPV	Q9Y5H4	41	SVPEETDKGSFVGNI
P0C0L4	1457	RRRREAPKVVEEQES	Q5VUJ6	702	VPSPAVPKLSMAKCR	Q9Y5I3	677	VESGQAPKASSRASV
P0C0L4	1477	VCIWRNGKVGLSGMA	Q5VUJ6	707	VPKLSMAKCRRNVEN	Q9Y5N1	325	RSLKRGSKPSASSAS
P0C0L4	1503	ALRADLEKLTSLSDR	Q5VV42	576	LLFAFFVKVYN****	Q9Y5R6	276	TGNQWQMKNMENRHA
[truncated: 191 more rows]

## Sheet: Malonylation
Uniprot_id	PTM_site	PTM_domain	Uniprot_id	PTM_site	PTM_domain	Uniprot_id	PTM_site	PTM_domain
O00116	108	SKFIFNKKGQIELTG	P35580	1800	QNKELKAKLQELEGA	Q15067	267	KPDGTYVKPLSNKLT
O00139	336	GKNQDCSKGIYALAA	P35580	1809	QELEGAVKSKFKATI	Q15067	437	QTARFLMKSYDQVHS
O00151	71	LEAQNRIKGCTDNLT	P35580	1842	KERAAANKLVRRTEK	Q15067	500	RLVEIAAKNLQKEVI
O00151	98	PLVTEEGKRHPYKMN	P35580	442	WLVHRINKALDRTKR	Q15075	1075	NQIGNQNKLIQELKT
O00154	172	LSLKNVDKVLEVPPV	P35606	328	EVQQANLKAMGDAEI	Q15075	1081	NKLIQELKTAKATLE
O00154	286	NFHDKIRKGCVITIS	P35606	346	ERLPLAVKDMGSCEI	Q15075	1110	KALQDIQKEKSLKEK
O00159	281	KVSSINDKSDWKVVR	P35606	386	TAMALRNKSFGSAQE	Q15075	1142	RQEKEITKLNEELKS
O00159	285	INDKSDWKVVRKALT	P35606	615	KVLPTIPKEQRTRVA	Q15075	1156	SHKLESIKEITNLKD
O00159	486	ICDLVEEKFKGIISI	P35606	627	RVAHFLEKQGFKQQA	Q15075	1162	IKEITNLKDAKQLLI
O00159	571	DLLFRNLKETMCSSK	P35610	104	FSVLEGEKNNHRAKD	Q15075	1165	ITNLKDAKQLLIQQK
O00159	595	RSELSDKKRPETVAT	P35637	316	GIIKTNKKTGQPMIN	Q15075	1178	QKLELQGKADSLKAA
O00159	667	AGFAYRRKYEAFLQR	P35659	349	TMKQICKKVYENYPT	Q15075	1183	QGKADSLKAAVEQEK
O00159	709	GYKPEEYKMGRTKIF	P35754	100	GELLTRLKQIGALQ*	Q15075	1254	NENLGTVKKEWQSSQ
O00170	112	LRNIAVGKDPLEGQR	P35754	20	GKVVVFIKPTCPYCR	Q15075	1308	KGEGEIEKLQTKVLE
O00170	273	KAYFKRGKAHAAVWN	P35914	111	PVLTPNLKGFEAAVA	Q15075	1319	KVLELQRKLDNTTAA
O00186	332	SALTQLMKKMPHFRK	P35914	137	ASELFTKKNINCSIE	Q15075	227	IEDVAVLKKELVQVQ
O00186	364	KFKLNIEKLCKTEQD	P35914	324	KVAQATCKL******	Q15075	294	VQELQKLKSSVNELT
O00186	76	REPVRQMKALYFITP	P35914	48	RDGLQNEKNIVSTPV	Q15075	342	IQATLHQKDLDCQQL
O00186	98	FLHDFASKSENKYKA	P35914	93	GDHTEVLKGIQKFPG	Q15075	387	ELSEVETKYQHLKAE
O00193	91	YQQSMDSKLSGRYRR	P35998	58	DIQQLLKKINELTGI	Q15075	396	QHLKAEFKQLQQQRE
O00203	305	RLLIRNTKPLLQSRN	P36542	112	AIHSSIAKQMKSEVA	Q15075	485	ELQHQLDKTKQQHQE
O00203	337	SEAGIISKSLVRLLR	P36542	115	SSIAKQMKSEVATLT	Q15075	534	NLEALLQKSKENISL
O00203	414	REFQTYVKSQDKQFA	P36542	154	DQFLVAFKEVGRKPP	Q15075	536	EALLQKSKENISLLE
O00203	512	ENCERVPKIAPDVLR	P36543	138	RMIVRCRKQDFPLVK	Q15075	700	VTAKLQDKQEHCSQL
O00203	592	VKSGALSKYAKKIFL	P36543	145	KQDFPLVKAAVQKAI	Q15075	791	TRLDLQKKSEALESI
O00203	596	ALSKYAKKIFLAQKP	P36543	59	KIMEYYEKKEKQIEQ	Q15075	799	SEALESIKQKLTKQE
O00203	74	VGMIAKGKNASELFP	P36551	404	LLYDRGTKFGLFTPG	Q15075	859	MTELSTVKDKLSKVS
O00203	90	VVKNVASKNIEIKKL	P36578	14	LISVYSEKGESSGKN	Q15075	864	TVKDKLSKVSDSLKN
O00231	185	HALSNLPKARAALTS	P36578	364	AAAALQAKSDEKAAV	Q15075	898	EKTCKELKHQLQVQM
O00232	212	ISKKINTKFFQEENT	P36776	148	IIEVKNKKLVELLRR	Q15075	973	QSSEQKKKQIEALQG
O00232	368	HNIRIMAKYYTRITM	P36776	368	KALSLLKKEFELSKL	Q15084	368	AINARKMKFALLKGS
O00232	448	KTTHLIAKEEMIHNL	P36776	426	EKFRERLKELVVPKH	Q15126	48	LRLSGPLKEQYAQEH
O00244	25	AVSRVLNKLGGVKYD	P36776	917	IVLPAENKKDFYDLA	Q15149	1150	RLRLPLDKEPARECA
O00244	57	TLLATLKKTGKTVSY	P36871	16	TQAYQDQKPGTSGLR	Q15149	1165	QRIAEQQKAQAEVEG
O00244	60	ATLKKTGKTVSYLGL	P36871	457	FDRSFVGKQFSANDK	Q15149	1175	AEVEGLGKGVARLSA
O00264	102	GKVFDVTKGRKFYGP	P36873	141	YGFYDECKRRYNIKL	Q15149	1186	RLSAEAEKVLALPEP
O00264	105	FDVTKGRKFYGPEGP	P36873	150	RYNIKLWKTFTDCFN	Q15149	1226	AIYLEKLKTISLVIR
O00291	56	NTQEVAVKEKHARTC	P36873	260	DGYEFFAKRQLVTLF	Q15149	1410	EECQRFAKQYINAIK
O00299	119	AKFSAYIKNSNPALN	P36897	490	LTALRIKKTLSQLSQ	Q15149	1508	EVEAALEKQRQLAEA
O00299	131	ALNDNLEKGLLKALK	P36957	154	GAAPAKAKPAEAPAA	Q15149	1718	AEAELQSKRASFAEK
O00299	135	NLEKGLLKALKVLDN	P36957	203	GKPVSAVKPTVAPPL	Q15149	1725	KRASFAEKTAQLERS
O00299	49	NVTTVDTKRRTETVQ	P36957	267	QEMRARHKEAFLKKH	Q15149	1774	ELERWQLKANEALRL
O00330	491	TRFLKSFKANLENPI	P36957	277	FLKKHNLKLGFMSAF	Q15149	1792	AEEVAQQKSLAQAEA
O00401	132	EEAKKFRKAVTDLLG	P36959	13	ADLKLDFKDVLLRPK	Q15149	1801	LAQAEAEKQKEEAER
O00410	613	SAWARMCKILGKEFQ	P37108	74	ISTVVSSKEVNKFQM	Q15149	1803	QAEAEKQKEEAEREA
O00442	163	KTRGYYPKGGGEVIV	P37235	174	EEFIRGAKSDPSIVR	Q15149	1833	LAEQELEKQRQLAEG
O00442	208	VLPFKVAKDMAAAAV	P37802	79	EGQAPVKKIQASTMA	Q15149	1908	MEVLLASKARAEEES
O00471	388	TGGIQDLKERIRQRT	P37837	130	RRLIELYKEAGISKD	Q15149	1975	AERVLAEKLAAIGEA
O00499	13	SKGVTAGKIASNVQK	P37837	277	LVPVLSAKAAQASDL	Q15149	2025	EEQAAQHKADIEERL
O00499	146	RIAKRGRKLVDYDSA	P37837	286	AQASDLEKIHLDEKS	Q15149	2099	AEDTLRSKEQAELEA
O00507	304	KEAKNEAKNDALSMI	P37837	314	KLSDGIRKFAADAVK	Q15149	2142	EEAARQRKAALEEVE
O00560	124	LCKDQDGKIGLRLKS	P37837	321	KFAADAVKLERMLTE	Q15149	2189	KRLQAEEKAHAFAVQ
O00560	223	GKITSIVKDSSAARN	P38117	205	IMKAKKKKIEVIKPG	Q15149	2309	AEMEKHKKFAEQTLR
O00567	87	LETHLPSKKKKVLLG	P38117	210	KKKIEVIKPGDLGVD	Q15149	2318	AEQTLRQKAQVEQEL
O00567	90	HLPSKKKKVLLGVGD	P38117	248	TTEDLVAKLKEIGRI	Q15149	2339	LEETDHQKNLLDEEL
O00571	264	NGRYGRRKQYPISLV	P38117	59	LKEKKLVKEVIAVSC	Q15149	2379	VQMEELSKLKARIEA
O00571	491	LHQFRSGKSPILVAT	P38159	86	IKVEQATKPSFESGR	Q15149	2447	QQRALAEKMLKEKMQ
O00571	55	ATKGFYDKDSSGWSS	P38606	139	KWDFTPCKNLRVGSH	Q15149	2452	AEKMLKEKMQAVQEA
O00571	66	GWSSSKDKDAYSSFG	P38646	135	YDDPEVQKDIKNVPF	Q15149	2473	AELLQQQKELAQEQA
O00571	81	SRSDSRGKSSFFSDR	P38646	138	PEVQKDIKNVPFKIV	Q15149	2553	QAEEIGEKLHRTELA
O00635	184	QKIRSDFKNLQCFLH	P38646	143	DIKNVPFKIVRASNG	Q15149	2604	EKLQQEAKLLQLKSE
O00767	341	YDRKKVSKAAILARI	P38646	187	NYLGHTAKNAVITVP	Q15149	2652	FIEQEKAKLEQLFQD
O14562	224	PLSGMYNKSGGKVRL	P38646	206	DSQRQATKDAGQISG	Q15149	2706	AEEGVRRKQEELQQL
O14562	250	GTKERTEKLPMGSIK	P38646	234	ALAYGLDKSEDKVIA	Q15149	2892	LTVNEAVKEGVVGPE
O14602	104	ADEARSLKAYGELPE	P38646	288	ALLRHIVKEFKRETG	Q15149	2903	VGPELHHKLLSAERA
O14602	88	LRDYQDNKADVILKY	P38646	300	ETGVDLTKDNMALQR	Q15149	3027	PLTDKAAKGGELVYT
O14617	371	LYGMVSKKNLMEIVK	P38646	368	RTIAPCQKAMQDAEV	Q15149	3091	TGRITVEKIIKIIIT
O14681	224	FEYRWFNKGIEMHQR	P38646	394	GGMTRMPKVQQTVQD	Q15149	3183	SIYNALKKDLLPSDM
O14684	42	GQVRLRKKAFANPED	P38646	600	ETKMEEFKDQLPADE	Q15149	338	NAIIHRHKPLLIDMN
O14727	288	PVESSLGKEKGLEIL	P38646	612	ADECNKLKEEISKMR	Q15149	3384	EVPVGGFKGRTVTVW
O14734	311	QEGVIRVKPQVSESK	P38646	617	KLKEEISKMRELLAR	Q15149	3420	TGKVTVEKVIKILIT
O14787	71	SLSGLILKNNVKAHY	P38646	76	VMEGKQAKVLENAEG	Q15149	3469	RAQFEQLKDGKTTVK
O14802	398	TFPEKVNKANINFLR	P38919	152	NVGEDIRKLDYGQHV	Q15149	3476	KDGKTTVKDLSELGS
O14818	52	VEKKSVAKLQDERTV	P38919	198	EMLNKGFKEQIYDVY	Q15149	3849	SIYQALKKGLLSAEV
O14832	310	EVVGIAHKFFGAENS	P38919	289	IFCNTKRKVDWLTEK	Q15149	3925	SLFQAMKKELIPTEE
O14920	469	NSCLSKMKNSMASMS	P38919	60	IYAYGFEKPSAIQQR	Q15149	3968	YQRGYLNKDTHDQLS
O14949	33	AYPHVFTKGIPNVLR	P39019	23	RALAAFLKKSGKLKV	Q15149	4091	LSVYQAMKKGIIRPG
O14950	151	REAPIDKKGNFNYIE	P39019	29	LKKSGKLKVPEWVDT	Q15149	4140	VGPEFKDKLLSAERA
O14964	207	IPKFGIEKEVRVCEP	P39023	294	IGQGYLIKDGKLIKN	Q15149	4152	ERAVTGYKDPYSGKL
O14974	947	LAENEKLKAQLHDTN	P39023	300	IKDGKLIKNNASTDY	Q15149	4167	ISLFQAMKKGLILKD
O14974	984	RSLLEMEKRERRALE	P40227	10	AVKTLNPKAEVARAQ	Q15149	4205	LPVEVAYKRGLFDEE
O14979	180	EVVDCTIKTDPVTGR	P40227	199	EIMEMKHKSETDTSL	Q15149	4480	VNKGLVDKIMVDRIN
O14980	446	EVVREFMKDTDSINL	P40227	280	KIIELKRKVCGDSDK	Q15149	4504	EDPRTKTKMSAAQAL
O14980	455	TDSINLYKNMRETLV	P40227	365	EKFTFIEKCNNPRSV	Q15149	4512	MSAAQALKKGWLYYE
O14980	700	KTNVRACKAVGHPFV	P40227	377	RSVTLLIKGPNKHTL	Q15149	4513	SAAQALKKGWLYYEA
O14980	757	TVKRETLKLISGWVS	P40227	381	LLIKGPNKHTLTQIK	Q15149	567	VRLLAAGKVPQRAGE
O14983	205	RAVNQDKKNMLFSGT	P40227	388	KHTLTQIKDAVRDGL	Q15149	581	EVERDLDKADSMIRL
O14983	515	VGNKMFVKGAPEGVI	P40261	23	NPRDYLEKYYKFGSR	Q15149	597	FNDVQTLKDGRHPQG
O15020	65	VQKKTFTKWVNSHLA	P40261	26	DYLEKYYKFGSRHSA	Q15149	630	TEYNLRLKAGVAAPA
O15042	866	ESGKRPKKPGQSFQE	P40261	39	SAESQILKHLLKNLF	Q15149	740	RLDLQYAKLLNSSKA
O15083	547	KINVLQKKIENLQEQ	P40429	191	NVEKKIDKYTEVLKT	Q15149	792	NTNMTAKKESYSALM
O15084	171	ANINAFDKKDRRAIH	P40763	370	KIKVCIDKDSGDVAA	Q15149	810	ELKEKKIKELQNAGD
O15091	512	KACLPDAKTQRLFFK	P40763	383	AALRGSRKFNILGTN	Q15149	932	AKAVVQLKPRHPAHP
O15111	425	LPIIQLRKVWAEAVH	P40925	110	KANVKIFKSQGAALD	Q15172	181	DFQPSIAKRYIDQKF
O15131	396	KAEFRTRKEAAWAIT	P40925	118	SQGAALDKYAKKSVK	Q15173	187	DFQPSVAKRYVDQKF
O15143	326	AGLDSLHKNSVSQIS	P40926	185	NTFVAELKGLDPARV	Q15185	33	DVNVNFEKSKLTFSC
O15143	367	KSLESALKDLKIK**	P40926	203	VIGGHAGKTIIPLIS	Q15233	107	AGEVFIHKDKGFGFI
O15144	186	KVFMQEFKEGRRASH	P40926	239	EAGTEVVKAKAGAGS	Q15233	109	EVFIHKDKGFGFIRL
O15144	275	AKTSDFLKVLNRARP	P40926	296	STPLLLGKKGIEKNL	Q15233	198	GIVEFSGKPAARKAL
O15144	295	EMKTITGKTFSSR**	P40926	301	LGKKGIEKNLGIGKV	Q15233	243	LPEKLVIKNQQFHKE
O15144	65	SISLKFYKELQAHGA	P40926	307	EKNLGIGKVSSFEEK	Q15233	5	***MQSNKTFNLEKQ
O15145	61	FFKNYEIKNEADRTL	P40926	314	KVSSFEEKMISDAIP	Q15233	99	KLFEKYGKAGEVFIH
O15173	100	TSLPRMKKRDFSLEQ	P40926	324	SDAIPELKASIKKGE	Q15257	331	QGLIRMYKAECLEKF
O15173	193	WEMQFKEKYDYVGRL	P40926	328	PELKASIKKGEDFVK	Q15276	282	QLKHTWQKANDQFLE
O15198	85	RLQVSHRKGLPHVIY	P40926	329	ELKASIKKGEDFVKT	Q15276	47	NQKRAKFKELYLAKE
O15228	357	VPRYIPQKQSEDMHA	P40926	335	KKGEDFVKTLK****	Q15276	559	ETRDQVKKLQLMLRQ
O15228	643	VRLGVVEKKKINNNC	P40926	78	IETKAAVKGYLGPEQ	Q15291	202	TSNTTAIKSIEFARK
O15228	645	LGVVEKKKINNNCIF	P40939	166	RIATKDRKTVLGTPE	Q15306	78	FKAWALFKGKFREGI
O15258	14	VGESVHGKPSVVYRF	P40939	214	IRADRAKKMGLVDQL	Q15365	115	QCGSLIGKGGCKIKE
O15260	139	AESRSEGKSMFAGVP	P40939	292	KVEEKVRKQTKGLYP	Q15366	115	QCGSLIGKGGCKIKE
O15260	22	DQFLRVTKQYLPHVA	P40939	295	EKVRKQTKGLYPAPL	Q15366	185	VTIPYRPKPSSSPVI
O15269	210	RSDIKLFKHNDMADL	P40939	326	GYLCESQKFGELVMT	Q15397	221	YSRNIVKKFLMYGSK
O15270	281	GATIRIFKHNNMQSL	P40939	334	FGELVMTKESKALMG	Q15397	591	HVGMKNLKSWASVNR
O15357	383	KLGVVFEKEKDRTQR	P40939	337	LVMTKESKALMGLYH	Q15404	158	PDIGKLTKLQILSLR
O15357	391	EKDRTQRKDFIFVSA	P40939	350	YHGQVLCKKNKFGAP	Q15404	243	YIRSETYKYLYGRHM
O15357	918	EPRSGSRKPAFTEAS	P40939	359	NKFGAPQKDVKHLAI	Q15417	6	**MTHFNKGPSYGLS
O15371	426	AVIATELKNNSYKLA	P40939	383	IAQVSVDKGLKTILK	Q15424	607	RSVVSFDKVKEPRKS
O15372	221	LMWELEKKSAVADKH	P40939	386	VSVDKGLKTILKDAT	Q15428	10	FQHRPGGKTGSGGVA
O15372	306	EDLSKLFKPPQPPAR	P40939	406	RGQQQVFKGLNDKVK	Q15436	185	LGCEGISKSYVFRGT
O15382	321	VERTITMKQLLRALE	P40939	411	VFKGLNDKVKKKALT	Q15436	329	KYVKKGTKHFEALAN
O15382	377	LRFQKELKEIQYGIR	P40939	413	KGLNDKVKKKALTSF	Q15436	556	QLIRLCQKFGEYHKD
O15382	44	LQLEMTQKPHKKPGP	P40939	414	GLNDKVKKKALTSFE	Q15459	55	EVRNIVDKTASFVAR
O15400	24	RISSNIQKITQCSVE	P40939	415	LNDKVKKKALTSFER	Q15459	717	QVPNMQDKTEWKLNG
O15511	87	LKVLISFKANDIEKA	P40939	46	THINYGVKGDVAVVR	Q15459	756	GMPAGKQKLQYEGIF
O15530	495	DPVNKVLKGEIPWSQ	P40939	505	HYFSPVDKMQLLEII	Q15477	525	YYAAVEAKKERMSKH
O43143	786	QLDRIIAKLQSKEYS	P40939	519	ITTEKTSKDTSASAV	Q15555	126	KLLQASFKRMNVDKV
O43148	137	ALEDVPEKQKNLEEG	P40939	531	SAVAVGLKQGKVIIV	Q15629	335	AFQAPAVKKKPTVTK
O43150	59	YKMKKSVKAINSSGL	P40939	569	LQEGVDPKKLDSLTT	Q15631	199	RKRYDGLKYDVKKVE
O43159	409	TFLRAVTKLGFKIVS	P40939	60	RINSPNSKVNTLSKE	Q15631	219	LSIRGFNKETAAACV
O43172	27	LVAPVVKKPHIYYGS	P40939	605	HVAEDLGKVFGERFG	Q15642	44	EVEQAYAKQLRSLVK
O43175	137	DGKWERKKFMGTELN	P40939	644	YIYQEGVKRKDLNSD	Q15643	813	LTQLINKKEIFIEKL
O43175	21	SLDPCCRKILQDGGL	P40939	646	YQEGVKRKDLNSDMD	Q15691	66	KKVKFQAKLEHEYIQ
O43175	289	PHLGASTKEAQSRCG	P40939	728	VDLYGAQKIVDRLKK	Q15691	83	KILQAGFKRMGVDKI
O43175	384	GLLKEASKQADVNLV	P41091	196	QNKIDLVKESQAKEQ	Q15717	320	KILQVSFKTNKSHK*
O43175	394	DVNLVNAKLLVKEAG	P41091	303	VRPGIVSKDSEGKLM	Q15738	126	RVNYIGTKNVIETCK
O43175	58	LIVRSATKVTADVIN	P41091	421	GGRVSAVKADLGKIV	Q15746	1474	EERLGSGKFGQVFRL
O43237	352	VRKLVHDKELAAEDE	P41091	426	AVKADLGKIVLTNPV	Q15843	48	QRLIYSGKQMNDEKT
O43242	186	KRYKEAQKISDDLMQ	P41091	59	HGKSTVVKAISGVHT	Q15942	265	SSPAPAPKFSPVTPK
O43242	455	EASINHEKGYVQSKE	P41214	402	FQESGHKKGSFLEGS	Q15942	35	PVVAPKPKVNPFRPG
O43324	138	LTVQEKEKYLNVSRW	P41227	78	HITSLAVKRSHRRLG	Q16134	223	TNDVGIQKDGAPKAT
O43390	103	AFLCGVMKTYRQREK	P41250	108	RKRVLEAKELALQPK	Q16181	186	FMKRLHEKVNIIPLI
O43390	300	FLEYEDHKSAAQARR	P41250	115	KELALQPKDDIVDRA	Q16181	326	YNGVDNNKNKGQLTK
O43395	649	SFGEMKFKQCPTENM	P41250	197	KTSGHVDKFADFMVK	Q16181	373	KEKVQKLKDSEAELQ
O43402	5	***MPGVKLTTQAYC	P41250	207	DFMVKDVKNGECFRA	Q16204	266	MRHIRFLKNEVERLK
O43414	277	KQWINLKKAYSFAMG	P41250	219	FRADHLLKAHLQKLM	Q16204	71	ASLQQENKVLKIELE
O43414	331	AYRGFIFKQTSKPF*	P41250	224	LLKAHLQKLMSDKKC	Q16222	182	KEFFTKHKYFGLKKE
O43432	903	IGELFKLKMLTEAIM	P41250	477	SCHARATKVPLVAEK	Q16222	356	LQHHVAQKKIPYVDT
O43432	919	DCVVKLLKNHDEESL	P41250	487	LVAEKPLKEPKTVNV	Q16513	171	NGSSKDRKLHGTAQQ
O43432	938	RLLTTIGKDLDFEKA	P41250	501	VVQFEPSKGAIGKAY	Q16531	1067	KVIKSVGKIEHSFWR
O43432	944	GKDLDFEKAKPRMDQ	P41250	559	TKDMINVKRFQKTLY	Q16537	173	EFQPSIAKKYIDQKF
O43592	311	VSWSKLIKNGDIKNA	P41250	733	FEGQETGKKETIEE*	Q16543	101	EERSWEQKLEEMRKK
O43676	34	TPLETIQKKLAAKGL	P41250	82	GDLVRKLKEDKAPQV	Q16543	154	KHKTFVEKYEKQIKH
O43678	46	KRYVELKKANPDLPI	P41250	93	APQVDVDKAVAELKA	Q16543	69	AECQRKLKELEVAEG
O43683	1014	KNEGGECKPEGLFRR	P41250	99	DKAVAELKARKRVLE	Q16555	472	SGRYIPRKPFPDFVY
O43684	216	DPSPEVQKKKYAFKC	P41252	1051	YPVSPSDKVLIQEKT	Q16576	119	GKIECEIKINHEGEV
O43707	181	QRKTAPYKNVNVQNF	P41252	1057	DKVLIQEKTQLKGSE	Q16585	41	KEHNSNFKAGYIPID
O43707	214	PELIEYDKLRKDDPV	P41252	1061	IQEKTQLKGSELEIT	Q16629	24	NLGTGAGKGELERAF
O43707	217	IEYDKLRKDDPVTNL	P41252	606	QKMSKRKKNYPDPVS	Q16630	138	VGSEASSKKLMDLLP
O43707	323	LEDRVPQKTIQEMQQ	P41252	844	DRKTIPIKYPLKEIV	Q16643	295	DNPREFFKQQERVAS
O43707	417	RLDHLAEKFRQKASI	P41252	861	HQDPEALKDIKSLEK	Q16658	220	TLEFRSGKVAFRDCE
O43707	50	LLDPAWEKQQRKTFT	P41252	903	PDHMVLGKRLKGAFK	Q16658	241	SGPSGTLKAGKATKV
O43707	54	AWEKQQRKTFTAWCN	P42025	319	DRLLSEVKKLAPKDI	Q16658	43	SASSLKKKQIWTLEQ
O43707	592	EAILAIHKEAQRIAE	P42166	13	EDPSVLTKDKLKSEL	Q16658	74	GRYLAADKDGNVTCE
O43707	604	IAESNHIKLSGSNPY	P42224	173	LQDEYDFKCKTLQNR	Q16666	214	VKVLSTTKPFEYETP
O43707	625	IINSKWEKVQQLVPK	P42224	193	GVAKSDQKQEQLLLK	Q16666	250	KVLNTSLKEKFNGKK
O43707	632	KVQQLVPKRDHALLE	P42224	200	KQEQLLLKKMYLMLD	Q16666	330	HKKTVNQKTTIYEIQ
O43707	66	WCNSHLRKAGTQIEN	P42224	201	QEQLLLKKMYLMLDN	Q16666	389	MHSFIQIKKKTNPRN
O43707	779	ASFNHFDKDHGGALG	P42224	296	YEHDPITKNKQVLWD	Q16666	663	DRNMEIPKGLIRSAS
O43708	57	FQALNPMKQVPTLKI	P42224	361	LNYNLKVKVLFDKDV	Q16666	734	CEEGDKLKLTCFELA
O43747	147	GEVEKLLKTSNSYLR	P42224	375	VNERNTVKGFRKFNI	Q16698	110	ISSQTGNKVHAIQCD
O43747	214	DMLAHFRKLVPQLVR	P42224	379	NTVKGFRKFNILGTH	Q16698	244	VIQPGPIKTKGAFSR
O43765	137	NRAAAYSKLGNYAGA	P42226	288	QVLKTQTKFQAGVRF	Q16698	97	SRKMDVLKATAEQIS
O43765	160	CIDPAYSKAYGRMGL	P42285	852	VLQMDELKCRKRVLR	Q16718	60	NEKLAMVKAEPDVKK
O43776	490	EEILAGYKREGIDPT	P42345	1218	VLICRIVKGYTLADE	Q16740	203	EEIMKLKKQLYNIYA
O43776	60	ERWNVISKSQLKNIK	P42345	2066	ERGPQTLKETSFNQA	Q16762	136	GGFRNWLKEGHPVTS
O43795	287	KLGNIEFKPESRVNG	P42345	230	REPKEMQKPQWYRHT	Q16762	14	YRALVSTKWLAESIR
O43795	561	FPEGNPAKINLKRPP	P42345	309	DLMGFGTKPRHITPF	Q16762	154	RPEPAVFKATLDRSL
O43795	565	NPAKINLKRPPTAGS	P42356	1531	SVANWRSKYISLSEK	Q16762	24	AESIRTGKLGPGLRV
O43809	189	KALFAVPKNYKLVAA	P42574	138	NGPVDLKKITNFFRG	Q16775	116	GGNEKLVKLESGLKV
O43809	29	NKYIQQTKPLTLERT	P42680	155	LFESSIRKALPPAPE	Q16795	175	SHLNANIKSSSRYLR
O43819	196	LGLTGSTKQVAQASH	P42680	164	LPPAPETKKRRPPPP	Q16795	189	RNKAVGEKVVRDAFP
O43837	135	YDMRLRRKLDLFANV	P42694	105	VLCCMQLKGKLQPVS	Q16822	108	DVARVESKTVIVTPS
O43865	267	HRLYQLSKAGKLCVP	P42704	1049	ACRLNQKKGAYDIFL	Q16836	185	MKLVEVIKTPMTSQK
O43865	270	YQLSKAGKLCVPAMN	P42704	107	IPKKLLQKVFNDTCR	Q16836	301	NKLVAENKFGKKTGE
O60264	319	RIKNEKSKLSEIVRE	P42704	1121	QVRRDYLKEAVTTLK	Q16836	68	DILAKSKKGIEESLR
O60282	167	KNRVPYVKGCTERFV	P42704	1224	GLAYLFRKVIEEQLE	Q16850	156	NPVFLEQKKMLKSGL
O60282	238	VDLAGSEKVSKTGAE	P42704	1332	MKSYVSEKDVTSAKA	Q16851	291	NKTRADVKGGTLTQY
O60282	253	GAVLDEAKNINKSLS	P42704	224	SKILGFMKTKDLPVT	Q16851	438	KLGSSFTKVQDYLRR
O60306	1045	TCTHAALKRHDLVKL	P42704	295	QTLEKVEKSELHLMD	Q16851	69	FHRFLQEKGPSVDWG
O60306	1051	LKRHDLVKLGFKYDN	P42704	613	QYFHQLEKMNVKIPE	Q16851	91	DSIQPYEKIKARGLP
O60361	109	IHGSDSVKSAEKEIS	P42704	864	RIHDVLCKLVEKGET	Q16854	135	EKLLQARKPVQIFER
O60361	34	PASEEHLKQHYIDLK	P42704	868	VLCKLVEKGETDLIQ	Q16875	100	EEAMKVRKQCALAAL
O60361	41	KQHYIDLKDRPFFPG	P42704	909	GNYKEAKKIIETPGI	Q16881	274	RVALREKKVVYENAY
O60361	70	WEGLNVVKTGRVMLG	P42765	137	RNVRFGTKLGSDIKL	Q16881	300	TNNKGKEKIYSAERF
O60361	85	ETNPADSKPGTIRGD	P42765	181	ISREECDKYALQSQQ	Q16881	449	GRDACTRKIGLETVG
O60488	388	IYKNVMSKVQEMNYI	P42765	209	EMAPIEVKTKKGKQT	Q16891	102	YNVPLPKKSIQSGPL
O60488	621	SFVVPNQKRLTLLAQ	P42765	214	EVKTKKGKQTMQVDE	Q16891	110	SIQSGPLKISSVSEV
O60504	477	EVELSFRKGEHICLI	P42765	234	TTLEQLQKLPPVFKK	Q16891	119	SSVSEVMKESKQPAS
O60506	221	EAAQEAVKLYNNHEI	P42765	241	KLPPVFKKDGTVTAG	Q16891	180	HPEIGEGKPTPALSE
O60506	297	FLEYEDHKTAAQARR	P42765	270	ASEDAVKKHNFTPLA	Q16891	282	RTVEGALKERRKAVD
O60506	363	KAFSQFGKLERVKKL	P42765	81	GLRVGIPKETPALTI	Q16891	353	QAAQSEAKVVSQYHE
O60573	134	DANKNGGKWIIRLRK	P43034	46	VNEELDKKYAGLLEK	Q16891	427	AEQKATEKQHITLAL
O60645	59	ASVEARLKAAIQSQL	P43034	54	YAGLLEKKWTSVIRL	Q16891	436	HITLALEKQKLEEKR
O60664	128	TKELVSSKVSGAQEM	P43034	64	SVIRLQKKVMELESK	Q16891	451	AFDSAVAKALEHHRS
O60664	289	VKQGVDQKLVEGQEK	P43155	186	SCRVPGPKQDTVSNF	Q1KMD3	7	*MEVKRLKVTELRSE
O60684	354	SPKESIRKEACWTIS	P43155	245	NSSLQTNKEPVGILT	Q27J81	625	MVAPRARKEPKEITF
O60701	431	DYERIHKKMLKPAFI	P43155	261	NHRNSWAKAYNTLIK	Q27J81	666	IRAGDTTKFDVEVLK
O60701	491	LQDPPNKKPKV****	P43155	390	FNITPEIKSDIEKAK	Q2KHT3	35	YLYHVLTKNTTVTEQ
O60701	6	**MFEIKKICCIGAG	P43220	415	EVQLEFRKSWERWRL	Q2M389	586	PLQVVMKKLDLISEL
O60716	749	RNKELIGKHAIPNLV	P43243	515	YSDSAVLKLAEPYGK	Q2NKX8	749	KKCPKLNKPQPQPSP
O60739	42	IQQRNGRKTLTTVQG	P43243	522	KLAEPYGKIKNYILM	Q2TAL8	655	SKVLRQTKKNPSNPK
O60749	211	IVPPAPEKSIVGMTK	P43243	555	MVDHCLKKALWFQGR	Q32P44	193	STESRGGKDPLSSPG
O60762	136	PEFIRKQKEGNFDIV	P43243	836	KLKKFLNKLAEERRQ	Q3SY17	165	YQAFKALKCHGIGEY
O60763	25	TEAETIQKLCDRVAS	P43304	634	RYKKRFHKFDADQKG	Q3SY69	209	VQLIADGKAPRIPQP
O60763	565	SYMKEKLKQLIEKRI	P43490	330	KVLEILGKKFPVTEN	Q3SY69	295	KKPGLVTKNGLVLFG
O60763	618	HEFTKLVKELEGVIT	P43490	469	FKNGKVTKSYSFDEI	Q3SY69	411	KFEGFIQKVVRKLRG
O60763	626	ELEGVITKAIYKSSE	P43686	330	RPGRLDRKIEFPLPD	Q3SY69	484	ASLADVDKAVAAAKD
O60763	858	SALLQETKELKNEIK	P43686	397	NRYIVLAKDFEKAYK	Q3SY69	490	DKAVAAAKDAFENGE
O60784	106	LVRTILPKNNPPTIV	P43686	401	VLAKDFEKAYKTVIK	Q3SY69	60	TVPDKDGKADPLALA
O60812	193	ELTQIKQKVDSLLEN	P43897	52	SSKELLMKLRRKTGY	Q3SY69	636	KFAELSVKAGFPKGV
O60812	29	NLNTLVVKKSDVEAI	P43897	56	LLMKLRRKTGYSFVN	Q3SY69	681	PIGKQIMKSCAVSNL
O60812	30	LNTLVVKKSDVEAIF	P43897	76	ETCGGDLKQAEIWLH	Q3SY69	70	PLALAAEKDGTPVFK
O60812	39	DVEAIFSKYGKIAGC	P45880	120	TFSPNTGKKSGKIKS	Q3SY69	756	VEEIKKMKIGDPLDR
O60814	109	LLPGELAKHAVSEGT	P45880	247	PTASISAKVNNSSLI	Q3SY69	778	NHKAHLEKLLQYCET
O60814	117	HAVSEGTKAVTKYTS	P45880	74	GTLETKYKWCEYGLT	Q3SY69	788	QYCETGVKEGATLVY
O60814	35	KKRKRSRKESYSVYV	P45973	32	VLDRRVVKGQVEYLL	Q3SY69	886	VFINTYNKTDVAAPF
O60814	47	VYVYKVLKQVHPDTG	P46060	279	GDCLVRSKGAVAIAD	Q3SY69	89	RVKGKTIKEVAEAYR
O60831	152	LKNKIENKIESIGLK	P46060	481	LKVSSVFKDEATVRM	Q3SY69	897	AAPFGGVKQSGFGKD
O60841	1015	INIGPVHKKDVMKAS	P46063	167	MLNASSSKEHVKWVH	Q3SY69	903	VKQSGFGKDLGEEAL
O60841	766	DRLYDWKKSPDSDVA	P46063	206	MFMSRLEKAYEARRF	Q3SYG4	390	VEMKELQKIIKDVNK
O60841	777	SDVAATLKKQKKNTK	P46063	487	KDSAFERKNITEYCR	Q3YEC7	104	EVWDVVDKGKCKKRG
O60841	784	KKQKKNTKDEFEERA	P46063	501	RDLIKILKQAEELNE	Q460N5	470	EEQSLKEKMIISPGR
O60841	936	QGVKILGKDLEKTLA	P46063	509	QAEELNEKLTPLKLI	Q460N5	511	VTQHLCLKGPSADVY
O60869	131	IERAIGLKLRGKDIG	P46063	514	NEKLTPLKLIDSWMG	Q495M9	438	VPLGPRKKILGAVRR
O60869	25	TAAQAKSKQAILAAQ	P46063	522	LIDSWMGKGAAKLRV	Q4G0N4	304	DGPWEKQKSSGLNLC
O60869	93	QSKGLTQKDLATKIN	P46459	105	EIDFLQKKSIDSNPY	Q4G0N4	76	SRVVVVAKTTRYEFE
O60869	98	TQKDLATKINEKPQV	P46459	198	SSLNLIGKAKTKENR	Q4G176	534	SLSHRELKEWARNVL
O60925	28	IDTQQKVKLADIQIE	P46459	699	TTIAQQVKGKKVWIG	Q53EP0	536	EDLTCTVKNLKRSTQ
O60934	233	TFIFLNAKQHKKLSS	P46459	728	DPEYRVRKFLALLRE	Q53EP0	975	AAGPQSLKLKWGDSN
O60934	73	LTLKDNSKYGTFVNE	P46776	94	RVNAAKNKTGAAPII	Q53FA7	176	LVTAGSQKKLQMAEK
O75027	216	VRNAVFGKVAQNSIR	P46777	5	***MGFVKVVKNKAY	Q53FA7	194	AAGFNYKKEDFSEAT
O75083	115	IAWTEDSKRIAVVGE	P46778	122	KKKEAKEKGTWVQLK	Q53FA7	321	HKYMEANKNIGKIVL
O75083	219	QIYIYDGKTGEKVCA	P46778	78	AVGIVVNKQVKGKIL	Q53GQ0	244	TKLAKIRKPTLDKPS
O75083	231	VCALGGSKAHDGGIY	P46781	139	QRHIRVRKQVVNIPS	Q53GQ0	84	VVLISRSKDKLDQVS
O75083	256	LLSASGDKTSKIWDV	P46781	155	IVRLDSQKHIDFSLR	Q53GQ0	86	LISRSKDKLDQVSSE
O75083	95	TQKEHLLKYEYQPFA	P46821	1777	VQSLEGEKLSPKSDI	Q53H82	247	ELVKIIYKNTPENLH
O75116	1022	AIKAQFEKQLLTERT	P46821	429	MYVLNPVKSSKEMQY	Q53H96	32	QGLIRAGKVEAQHIL
O75116	323	PEDAEISKHAKNLIC	P46821	531	QVPTPVVKQTKLKQR	Q53LP3	57	ARARAHFKELVNAVA
O75131	158	DNKDLFGKSDPYLEF	P46926	64	KNGDLSFKYVKTFNM	Q53LP3	75	VDPADGAKYVHLKKR
O75131	52	VERTERIKNCLNPQF	P46937	315	LQQLQMEKERLRLKQ	Q53R41	236	NVAKSIAKFLRNVRY
O75165	1006	TKGMLNAKTRCWAQG	P46939	1172	VEEMKRAKEDVLQKE	Q53S33	41	LRVTQILKEKFPRAT
O75165	17	LACFYTTKHSWRGKY	P46939	1190	KILKDNIKLLAAKVP	Q567U6	324	RKVISLNKQIAQKTK
O75165	1848	TSSTKIIKEAMAKGA	P46939	1536	GAQVTEGKQDLERAS	Q567U6	377	ALEKIESKADPSILQ
O75165	1891	ADKLIGPKVRITLMK	P46939	2518	GNRQKMVKALGNSEE	Q5JPH6	480	SEGLEGTKYSNVMKL
O75165	2161	ATKAQIVKALKAMTR	P46939	2769	LDLHPSLKMSRQLDD	Q5JPH6	486	TKYSNVMKLLRMALS
O75165	741	QKENINQKPVVLRKR	P46940	1027	YLLLRLFKTALQEEI	Q5JRA6	1240	KLSNYEQKIKESKKH
O75165	866	HRFLLTPKVNMKCLC	P46940	1083	VKEIMDDKSLNIKTD	Q5JRX3	1000	LFAVSHDKLLAVSDR
O75167	558	LKRRLSRKLSLRPTV	P46940	1088	DDKSLNIKTDPVDIY	Q5JRX3	1013	DRYLGTGKSTHGLAI
O75167	604	ARLTPADKAAIRKEL	P46940	1230	RNLGSIAKMLQHAAS	Q5JRX3	1027	ILGPENPKIAKDPSW
O75323	75	KETSNLYKLQFHNVK	P46940	1475	ELGTVDPKNKYQELI	Q5JRX3	550	ELRSQQSKPQDASCL
O75348	37	NRRLKQAKEEAQAEI	P46940	1532	DYYKSYIKTCLDNLA	Q5JRX3	759	IAEMTDIKPILRKLP
O75351	147	EGAKEALKEAVILPI	P46940	1541	CLDNLASKGKVSKKP	Q5JRX3	770	RKLPRIKKHLLNGDN
O75351	17	KAIDLASKAAQEDKA	P46940	1562	KSKKISLKYTAARLH	Q5JRX3	884	DPDHASLKILARLMT
O75351	61	AKQSIRAKCTEYLDR	P46940	401	LINAAIQKGVAEKTV	Q5JRX3	946	VDWAKSGKFTQQDID
O75367	285	SPVWGADKCEELLEK	P46940	687	DNNSKWVKHWVKGGY	Q5JSL3	53	ENVIAQRKTQIYSDP
O75367	307	LADDKKLKSIAFPSI	P46940	924	IGLLVKNKITLQDVV	Q5JTH9	511	QAHPVMRKCLQSLCD
O75368	17	SSGSTAIKKKQQDVL	P46940	935	QDVVSHSKKLTKKNK	Q5JTH9	671	ALRTLITKGCQAEAD
O75369	100	KLVSIDSKAIVDGNL	P47755	268	QLPVTRTKIDWNKIL	Q5K651	1259	NYIPYLTKLKFSLKK
O75369	1044	PPDPSKVKAHGPGLE	P47755	273	RTKIDWNKILSYKIG	Q5K651	214	TEEDVKMKFSNEVFR
O75369	1425	VVDPSKVKIAGPGLG	P47755	278	WNKILSYKIGKEMQN	Q5MNZ6	206	RIATASEKGTLIRIF
O75369	1510	PRSPFKVKVLPTYDA	P47756	145	GDGSKKIKGCWDSIH	Q5R372	252	YSFCTAFKRSSRQVS
O75369	1572	RAIVHDNKDGTYAVT	P47756	199	SLTRQMEKDETVSDC	Q5SRE5	1386	QTPSASRKSLDAPSW
O75369	16	AEDAPWKKIQQNTFT	P47756	223	LVEDMENKIRSTLNE	Q5SRE5	38	QIEAELNKHWRRLLE
O75369	2170	GVHTVSVKYRGQHVT	P47756	95	MPSARLRKLEVEANN	Q5SSJ5	190	IRKYIIHKYPSLELE
O75369	2342	VSELEPDKYAVRFIP	P47897	25	QKARETLKNSALSAQ	Q5SW79	964	KSFTSLYKDRCSTGS
O75369	2468	HIVGSPFKAKVTGQR	P47897	366	HQRGEELKGHNTLPS	Q5SWX8	63	NLKHPKAKLDNLDEE
O75369	2524	SKGAGLSKAFVGQKS	P47897	412	KLVMEDGKMDPVAYR	Q5T0F9	419	RMHERIAKQYQDAIR
O75369	2530	SKAFVGQKSSFLVDC	P47897	498	YAVVSKRKILQLVAT	Q5T160	138	FSSPNVAKKFHVGHL
O75369	2576	YNVTYVVKERGDYVL	P47897	620	FIERTDFKEEPEPGF	Q5T160	221	ADDKSVAKAAQEFFQ
O75369	340	FAGQHISKSPFEVSV	P47897	628	EEPEPGFKRLAWGQP	Q5T160	352	VTDKGQKKHFQQVFQ
O75369	349	PFEVSVDKAQGDASK	P47897	769	FNRTVTLKEDPGKV*	Q5T160	511	RFDEVLYKSSQDFQP
O75369	495	GVTMKGPKGLEELVK	P48047	172	LSQGQVLKLEAKTDP	Q5T160	542	AHKTLQIKDSPPEVA
O75369	681	DAGKAPLKIFAQDGE	P48047	176	QVLKLEAKTDPSILG	Q5T1C6	207	LDKVEGRKFFVSCNV
O75369	697	QRIDIQMKNRMDGTY	P48047	192	MIVRIGEKYVDMSVK	Q5T1M5	707	TSEQAQSKFKSEKQN
O75369	746	GSHPQKVKVFGPGVE	P48047	199	KYVDMSVKTKIQKLG	Q5T2N8	105	YIEARLGKPSLVRET
O75369	93	FLDRESIKLVSIDSK	P48047	54	SAASKQNKLEQVEKE	Q5T2N8	189	GKTLFAKKLALHSGM
O75369	987	TILSPSRKVVPCLVT	P48047	60	NKLEQVEKELLRVAQ	Q5T2N8	249	LRKRATEKISEDLRA
O75390	103	FSIPECQKLLPKAKG	P48047	70	LRVAQILKEPKVAAS	Q5T2N8	320	YLNEYVLKPATEGKR
O75390	321	QLQKEVGKDVSDEKL	P48047	73	AQILKEPKVAASVLN	Q5T440	309	ASGQTVGKFRAGQGN
O75390	382	KLVAQLYKIVPNVLL	P48047	84	SVLNPYVKRSIKVKS	Q5T4S7	3551	YIKLSSIKVDTRYTT
O75390	393	NVLLEQGKAKNPWPN	P48047	90	VKRSIKVKSLNDITA	Q5T4S7	434	TALADKGKEKDPLAA
O75390	43	ILADLIPKEQARIKT	P48047	98	SLNDITAKERFSPLT	Q5T5C0	855	SGTILRLKGAILRMA
O75390	450	GFPLERPKSMSTEGL	P48059	290	TKLTLKNKFVEFDMK	Q5T5C0	924	ICSEKQAKVISLPTQ
O75390	76	YGGMRGMKGLVYETS	P48059	301	FDMKPVCKKCYEKFP	Q5T9A4	135	ARAQYQDKLARQRYE
O75396	169	ALSALDSKANNLSSL	P48059	317	ELKKRLKKLAETLGR	Q5T9A4	427	RATEEISKDLRATLN
O75396	178	NNLSSLSKKYRQDAK	P48200	611	CGILSGNKNFEGRLC	Q5T9A4	46	DRPAPKDKWSNFDPT
O75396	38	QQYQSQAKQLFRKLN	P48426	15	GSSVLASKTKTKKKH	Q5TC82	136	LSRPMQRKLVTLVHC
O75400	433	PRYSALAKLSEKKQA	P48444	142	EMDSHEEKVFRAVRE	Q5TFE4	171	AAIQHNYKMSAFKEN
O75427	602	LSALKARKNVESFLE	P48444	241	EVDNFVDKLKSEGET	Q5THJ4	3524	FRIDNFSKVPVVFTQ
O75436	214	MELQLIKKEITGIGP	P48444	351	IGLKNPEKSFPVNSD	Q5VIR6	360	NFEGFLAKRFSGCTL
O75436	242	IMDGAPVKGESIPIR	P48449	470	AVLLLQEKCPHVTEH	Q5VSL9	536	LAAAPTSKAKTDSIN
O75439	148	YYAKAFSKDLPRAVE	P48506	492	YFRKDICKGGNAVVD	Q5VT66	67	QLWIYPVKSCKGVPV
O75439	219	LGPTENIKSISRKDL	P48507	263	SRGIIKSKGYILQAK	Q5VTQ0	514	GKSIPTEKFAVRKAR
O75439	224	NIKSISRKDLVDYIT	P48507	9	GTDSRAAKALLARAR	Q5VW32	148	KEVHRSLKIAAGIFK
O75475	16	DLIFAKMKGYPHWPA	P48556	111	RKSPNLSKCGEELGR	Q5VW32	283	EAEKLYAKAEALCKE
O75475	201	RGRPKMVKQPCPSES	P48556	138	TTGTKLTKQQLILAR	Q5VW36	520	LPKLGVHKVCIGQIL
O75475	407	LKKIRRFKVSQVIME	P48556	159	AQWSILRKDIPSFER	Q5VYK3	1438	SRDSSTEKLLQKLNG
O75521	161	MFNRPKKKNAINTEM	P48556	297	ILFFNTPKKMTDYAK	Q5VYK3	1442	STEKLLQKLNGWYME
O75521	218	GGVEEKAKNNAVLLR	P48637	186	ILSNNPSKGLALGIA	Q5VYK3	336	VSTRVKLKIVPHLLR
O75521	305	EMLIFGKKLTAGEAC	P48643	170	EPLIQTAKTTLGSKV	Q5VZF2	243	PPAHLQAKIKAAQHQ
O75521	359	IRKREREKLHAVNAE	P48643	223	GGRLEDTKLIKGVIV	Q5W0V3	96	ETLYTLGKADCPPGM
O75521	51	ENSMNQVKLLKKDPG	P48643	226	LEDTKLIKGVIVDKD	Q63HN8	1405	QELIQAKKLLQDISE
O75521	64	PGNEVKLKLYALYKQ	P48643	259	TCPFEPPKPKTKHKL	Q63HN8	596	YLWQHLKKHVVPLPD
O75521	92	FDLINKAKWDAWNAL	P48643	261	PFEPPKPKTKHKLDV	Q63HR2	1131	QESQSNVKFVQDTSK
O75531	64	DLFREWLKDTCGANA	P48735	106	DSALATQKYSVAVKC	Q63ZY3	223	LSVLQEEKRQLTVQL
O75533	790	EMKKIVLKVVKQCCG	P48735	155	FREPIICKNIPRLVP	Q63ZY3	297	AVLETQLKKALQELQ
O75534	682	RATVECVKDQFGFIN	P48735	166	RLVPGWTKPITIGRH	Q63ZY3	298	VLETQLKKALQELQA
O75575	34	RKESGKNKHSSGQQN	P48735	180	HAHGDQYKATDFVAD	Q66K74	380	SRGPVPAKPTVLFEK
O75643	1134	CPLRQFRKLPEEVVK	P48735	199	FKMVFTPKDGSGVKE	Q68DU8	185	REGQADAKFRRVPRI
O75643	1176	KMGKTIHKYVHLFPK	P48735	282	KTDFDKNKIWYEHRL	Q69YN2	234	ANVGNPEKKKYLYAF
O75643	1421	TDLKLLGKGNIIIST	P48735	384	RGLEHRGKLDGNQDL	Q69YQ0	896	SGPISTSKPLTALSD
O75643	944	GISHDDLKGDPLLDQ	P48735	413	VESGAMTKDLAGCIH	Q6DD88	239	LDKRLQVKEHQHEEI
O75648	103	NPDIVCNKHIKFSCF	P48735	45	HYADKRIKVAKPVVE	Q6DD88	407	KTKKMGGKDFSFRYQ
O75815	541	TAMLKRAKELFTNND	P48735	48	DKRIKVAKPVVEMDG	Q6GMV3	134	EEVGQYLKKFRLFK*
O75821	209	PVQATQNKTGKYVPP	P48735	69	IWQFIKEKLILPHVD	Q6IA86	587	TLLASACKAAKKEHA
O75822	117	PEEQLADKLRLKKLQ	P49023	570	FCLKQLNKGTFKEQN	Q6IBS0	110	ATRATVKKEFGGGHI
O75832	116	PLHYAASKNRHEIAV	P49189	30	ADASGTEKAFEPATG	Q6L8Q7	61	ALADGSHKNMQRDQS
O75844	429	AKKLGKAKDLYSALI	P49189	310	KFTEEVVKQTQRIKI	Q6N069	52	HGETLAMKGLTLNCL
O75844	470	LERLQALKTMKQH**	P49189	316	VKQTQRIKIGDPLLE	Q6NUK1	228	MMQVHGSKSDKMNIF
O75879	529	RNPRAINKLIGLVRK	P49257	346	NRIHLEIKQLNRQLD	Q6NUK1	231	VHGSKSDKMNIFGGF
O75880	89	GDSTRPSKPGPVSWK	P49327	1072	KLYTLQDKAQVADVV	Q6NUK1	320	KTRLAVGKTGQYSGI
O75891	205	ATYEGIQKKETAKIN	P49327	1239	VENMPSLKMKVVEVL	Q6NUK1	332	SGIYDCAKKILKHEG
O75891	35	GVFTVPDKDGKADPL	P49327	1582	DIMLATGKLSPDAIP	Q6NUK1	336	DCAKKILKHEGLGAF
O75891	539	YFAGWCDKIQGSTIP	P49327	1866	EEPEAVLKGAKPKLM	Q6NUK1	437	LFRRIISKEGIPGLY
O75907	391	WCIRHFYKPMLRRGS	P49327	2193	KLQELSSKADEASEL	Q6NUM9	101	LVLEQHTKAGGCCHT
O75915	185	RLTDYISKVKE****	P49327	2206	ELACPTPKEDGLAQQ	Q6NUM9	48	PAPLVTDKEARKKVL
O75915	31	PDFRDISKWNNRVVS	P49327	235	VVAVLLTKKSLARRV	Q6NUM9	56	EARKKVLKQAFSANQ
O75947	109	AEWVSLSKARIVEYE	P49327	298	EAHGTGTKVGDPQEL	Q6NUQ4	230	IQAILQDKPKIATAN
O75947	117	ARIVEYEKEMEKMKN	P49327	528	LRSDEAVKPFGLKVS	Q6NVY1	237	LALKSPSKENIASVL
O75947	144	NEAFPETKLDKKKYP	P49327	673	RKEGVFAKEVRTGGM	Q6NVY1	301	EQLKVINKMSPTSLK
O75947	149	ETKLDKKKYPYWPHQ	P49327	70	SFFGVHPKQAHTMDP	Q6NVY1	353	VRAVLIDKDQSPKWK
O75947	63	YYKANVAKAGLVDDF	P49327	786	CTIIPLMKKDHRDNL	Q6NVY1	377	EDLNNHFKSLGSSDL
O75947	72	GLVDDFEKKFNALKV	P49368	138	DDMISTLKKISIPVD	Q6NVY1	92	IIKGAGGKAFCAGGD
O75947	85	KVPVPEDKYTAQVDA	P49368	15	LVLSQNTKRESGRKV	Q6NXT6	90	FLEHNEAKYTERRER
O75955	166	DYLHSLGKARTAQVQ	P49368	203	KKYARVEKIPGGIIE	Q6NZI2	109	TTSNTVSKLLEKVRK
O75962	2120	DFLKYSKKASLDTSE	P49368	222	LRGVMINKDVTHPRM	Q6NZI2	122	RKVSVNVKTVRGSLE
O75962	264	IEEHSQLKKKVIKAP	P49368	248	LDSSLEYKKGESQTD	Q6NZI2	137	RQAGQIKKLEVNEAE
O75962	269	QLKKKVIKAPIEDLD	P49368	249	DSSLEYKKGESQTDI	Q6NZI2	152	LLRRRNFKVMIYQDE
O75964	24	NAAVTYSKPRLATFW	P49368	381	ILLRGASKEILSEVE	Q6NZI2	161	MIYQDEVKLPAKLSI
O75964	55	RAIQSLKKIVNSAQT	P49406	178	VQEIQVVKLEKRLDD	Q6NZI2	165	DEVKLPAKLSISKSL
O76003	151	APCMLFMKGTPQEPR	P49406	221	KVPVNELKVKMKPKP	Q6NZI2	170	PAKLSISKSLKESEA
O76024	143	QGRREAVKLLRRCLA	P49406	284	KIEAAIWKEIEASKR	Q6NZI2	299	TSRDKLRKSFTPDHV
O76031	449	GTPSNLGKGRRAAAA	P49411	234	RDPELGLKSVQKLLD	Q6P158	1104	FVSPWDKKEEANQKK
O76094	201	QAMKILQKAEDLCRR	P49411	256	VPARDLEKPFLLPVE	Q6P1M0	454	LVGRIIQKDPLRRFD
O76094	36	RALKTVNKILQINKD	P49411	286	LERGILKKGDECELL	Q6P1M0	471	LNQGANNKKIAKDVF
O76094	383	KLTMAQLKISQGNIS	P49411	342	RRGLVMVKPGSIKPH	Q6P1N9	229	DAPWCGVKSTHAGSK
O76094	391	ISQGNISKACLILRS	P49411	347	MVKPGSIKPHQKVEA	Q6P1N9	27	GIYRGVQKHQDDLQD
O76094	475	SDLQQLWKQNPKDIH	P49411	361	AQVYILSKEEGGRHK	Q6P1N9	46	AVEIGVKKFMITGGN
O76094	504	EKAKALSKHLPSSDS	P49419	352	EVVNRLKKAYAQIRV	Q6P2E9	1087	SMKENISKLLKSKNL
O94776	152	GEIRVGCKYQAEIPD	P49419	528	TCTINYSKDLPLAQG	Q6P2E9	1092	ISKLLKSKNLTDAIA
O94804	248	NPMRVLLKIAKSDPP	P49458	76	LMRLMVAKEARNVTM	Q6P2I3	174	GKKGKHIKATDAMAH
O94804	665	KLMKKEVKNEVEKLP	P49585	33	EEDGVPSKVQRCAVG	Q6P2I3	203	WLTRRNGKQWLLGKT
O94817	69	VGDTPIMKTKKWAVE	P49588	19	QRFIDFFKRNEHTYV	Q6P2I3	234	VADPHNLKICCRVNG
O94826	170	FEQLQKWKEVAQDCT	P49588	625	VLGEADQKGSLVAPD	Q6P2Q9	2049	TQTRTVNKHGDEIIT
O94826	185	KAVELNPKYVKALFR	P49588	876	KALNEALKLFKMHSP	Q6P2Q9	36	KLQEKARKWQQLQAK
O94826	188	ELNPKYVKALFRRAK	P49588	879	NEALKLFKMHSPQTS	Q6P2Q9	746	ILRYVKAKADWWTNT
O94826	233	LLADKVLKLLGKEKA	P49588	930	VSGLMDGKGGGKDVS	Q6P587	115	VQDECKKKGLPWTLA
O94832	329	TGRDIIDKQHTEQEA	P49589	503	DKKTAIHKALCDNVD	Q6PCB7	346	EICRYLLKQPVREAE
O94851	63	KVTTWKAKALWYKLD	P49589	726	GQAKKLKKLFEAQEK	Q6PI26	397	IQKVKSKKLAALAEA
O94855	803	AVLHQPLKVIREILV	P49590	444	IKAEMLYKNNPKLLT	Q6PI48	154	ELLNACKKLPFEIKN
O94874	289	SYIKKRYKTTQLLFL	P49590	52	QLKAHQEKPNFIIKT	Q6PJI9	466	AKLLKILKDTALQKV
O94874	556	NNIRLFEKGMKFFAD	P49590	91	CFKRHGAKGMDTPAF	Q6PKG0	1017	KLQEYLGKFRRLEDF
O94874	571	DTQAALTKHLLKSVC	P49591	12	LDLFRVDKGGDPALI	Q6PKH6	63	HVVVSSRKQQNVDQA
O94903	125	DSVKLADKVNSSWQR	P49591	62	KLKNLCSKTIGEKMK	Q6PKH6	90	GTVCHVGKAEDRERL
O94916	339	GNDSGRVKPHGFYQA	P49662	345	HLEEVFRKVQQSFET	Q6PML9	374	LRRNARAKGMSFYKY
O94925	158	QEKIPVHKFITALKS	P49720	77	RLNLYELKEGRQIKP	Q6PML9	479	VRAIHDVKATDLGLG
O94925	164	HKFITALKSTGLRTS	P49721	162	RAVELLRKCLEELQK	Q6PML9	487	ATDLGLGKVRFKAEV
O94925	176	RTSDPRLKECMDMLR	P49748	195	GILLFGTKAQKEKYL	Q6UB35	189	VTDINLGKLVRGDAH
O94925	245	AKKQSGGKVADYIPQ	P49748	276	DPATGAVKEKITAFV	Q6UB35	516	HENTQTDKALYNRLV
O94925	279	RHSTGDTKVPFCLQS	P49748	278	ATGAVKEKITAFVVE	Q6UB35	596	IGQGNTEKGHYRQAQ
O94925	311	YVHRYVGKEPSGLRF	P49748	480	ALQGCMDKGKELSGL	Q6UB35	92	VLSLLQEKNPAFKPV
O94925	396	FAIGYYLKEKKCFPE	P49748	482	QGCMDKGKELSGLGS	Q6UWP7	221	RSNAFAEKNGLQKYE
O94973	117	RLINNAIKNDLASRN	P49748	556	AKLIKHKKGIVNEQF	Q6UWP7	297	IDTLPTSKEDLQLWC
O94973	35	AEIKRINKELANIRS	P49748	635	QELYRNFKSISKALV	Q6UXN9	63	KRTLYSKKYGVDLIR
O94979	1217	VVLTQANKLGV****	P49748	639	RNFKSISKALVERGG	Q6UXV4	212	SEIEVPAKTTHVLKH
O95071	2656	QPLHAMRKGLLDVLP	P49748	71	KPAKAESKSFAVGMF	Q6UXV4	218	AKTTHVLKHSVPLPT
O95139	24	ELRRRWLKDQELSPR	P49753	104	RASLRDEKGALFQAH	Q6V702	66	REDFEARKAAIEIAR
O95139	49	PMEKFWNKFLENKSP	P49754	508	LKKDSQNKTLLKTLA	Q6VY07	918	SRLICSAKQQQTMLR
O95139	54	WNKFLENKSPWRKMV	P49756	135	AFGFCEYKEPESTLR	Q6YN16	385	KMFSGKLKPTMAFMS
O95155	1106	ILTKQVQKPFLRPEL	P49756	160	GEKKLLVKVDAKTKA	Q6YN16	409	ALAIKLEKLMNQMNA
O95155	794	NRTVEDLKNNESQWK	P49756	739	EEKRKHIKSLIEKIP	Q6YN16	42	ANIVIAAKTAQPHPK
O95159	10	LCKCPKRKVTNLFCF	P49773	21	GGDTIFGKIIRKEIP	Q6YN16	87	QISAAVEKAIKKFGG
O95182	40	KRTQPPPKLPVGPSH	P49773	30	IRKEIPAKIIFEDDR	Q6ZMR3	155	WKLSGFPKNRVIGSG
O95182	80	QKALVSGKPAESSAV	P49792	1220	ERGIGNVKILRHKTS	Q6ZNE5	171	KIQRHNRKLGDLVEK
O95197	1028	AKLPGIAKKKAE***	P49792	2125	KLEQLAAKFKTPELA	Q6ZNE5	328	LDVNLPKKLCNSEFC
O95197	998	PIVYEKYKTQIDHYV	P49821	104	LKWSFMNKPSDGRPK	Q709F0	683	ESRIAIEKIRLLTLK
O95202	373	GVDSLNVKELQAACR	P49821	66	RGDWYKTKEILLKGP	Q7KZF4	102	VCFTIENKTPQGREY
O95248	1770	SYEGTLYKKGAFMKP	P49902	140	TREQYPNKFIQRDDT	Q7KZF4	193	FVDSHHQKPVNAIIE
O95249	26	LENELDLKLVSFSKL	P49902	211	AVDWVHYKGSLKEKT	Q7KZF4	339	PTANLDQKDKQFVAK
O95292	118	PEDLMDSKLRCVFEL	P49914	150	GNRLGRGKGYYDAYL	Q7KZF4	389	NTQDKNKKLRPLYDI
O95298	114	TYGEIFEKFHPIR**	P49915	145	SLFRGLQKEEVVLLT	Q7KZF4	414	RKKLIGKKVNVTVDY
O95299	75	TGKGKLAKEIAEKLG	P49915	416	EPLKDFHKDEVRILG	Q7KZF4	541	VFSGSRLKLYLPKET
O95299	80	LAKEIAEKLGFKHFP	P49916	442	PNAYEAFKASRNLQD	Q7KZF4	641	AERSSYYKSLLSAEE
O95319	458	SAKVFIDKQTNLSKC	P49916	615	RPLCERRKFLHDNMV	Q7KZF4	71	AATQPDAKDTPDEPW
O95336	180	APISDSPKPPPQRVT	P49916	663	GLVLKDVKGTYEPGK	Q7KZF4	758	EKVESPAKIHVFYID
O95340	173	RARAGEIKGFTGIDS	P50213	100	MGLKGPLKTPIAAGH	Q7L1Q6	223	MELFPANKQSVEHFT
O95340	233	ELFVPENKLDHVRAE	P50213	350	KDLGGNAKCSDFTEE	Q7L1Q6	390	DAHVAKGKSVFLEQM
O95340	435	RLLERGYKHPVLLLH	P50213	58	MKIFDAAKAPIQWEE	Q7L1Q6	60	FLDASGAKLDYRRYA
O95347	1160	ANVLFKTKFVDGVST	P50213	77	AIQGPGGKWMIPSEA	Q7L1W4	632	LLVLNSLKKMMNVAE
O95394	177	NTGGRYGKATIEGYY	P50395	164	TFEGIDPKKTTMRDV	Q7L5N7	362	LDWDGVRKHLDEYAS
O95394	350	KVPVYCTKTGVKHLH	P50395	269	NGKVIGVKSEGEIAR	Q7L5Y9	186	LAWCHDNKSRLRKMK
O95394	453	DLPNRQLKVQVADRR	P50395	293	YVKDRVEKVGQVIRV	Q7L8L6	507	RLAQERTKFDLLKEL
O95425	1617	EVTLAQRKIAFQLAK	P50395	57	EDLYKRFKIPGSPPE	Q7LBR1	42	KIKKAIQKGNMEVAR
O95433	208	GVKIPTCKITLKETF	P50402	37	TRRLYEKKIFEYETQ	Q7LBR1	6	**MSNMEKHLFNLKF
O95433	212	PTCKITLKETFLTSP	P50416	180	RLPVPAVKDTVNRYL	Q7LBR1	97	KSMAGVVKSMDATLK
O95453	211	PCTGFQRKLIYQTLS	P50452	263	SEKLTKSKVQVFLPR	Q7RTV0	3	*****MAKHHPDLIF
O95453	326	FPRLLDTKLMASTQP	P50454	287	RLEKLLTKEQLKIWM	Q7RTV0	95	IVNLGSSKTDLFYER
O95453	413	IHVSARSKLIEPFFN	P50454	334	TEAIDKNKADLSRMS	Q7Z2W4	629	GEEKDKRKNSNVDSS
O95456	264	RSLKGLVKNIPQSTE	P50454	39	TAEKLSPKAATLAER	Q7Z2Z2	625	VRVAVEPKHPSEMPQ
O95571	172	DFQQGCAKTLYHSVH	P50502	118	MDQANDKKVAAIEAL	Q7Z3J2	204	DAWASDQKVKALKIV
O95573	363	TLADQSSKIKKGSKG	P50502	14	NELRAFVKMCKQDPS	Q7Z3J2	209	DQKVKALKIVIQCSK
O95573	392	EIMDRIYKNVMNKVS	P50502	153	RLAILYAKRASVFVK	Q7Z3J2	44	PITVTESKTKKVNRK
O95573	397	IYKNVMNKVSEMSSF	P50502	160	KRASVFVKLQKPNAA	Q7Z3U7	1423	VVVDLYQKTACHKAV
O95573	547	YKNEAKTKADFFEDE	P50502	360	KVMNLISKLSAKFGG	Q7Z406	433	YVQKAQTKEQADFAL
O95573	679	EKFEIPVKIRLSPEP	P50552	71	CAIVRGVKYNQATPN	Q7Z434	10	FAEDKTYKYICRNFS
O95573	706	KLKRKELKTHYQADI	P50570	299	SLPALRSKLQSQLLS	Q7Z434	7	*MPFAEDKTYKYICR
O95573	96	DKVFTYAKNKFKNKR	P50570	562	DEEEKEKKYMLPLDN	Q7Z449	487	FIPFGIGKRVCMGEQ
O95639	69	GEKTVVCKHWLRGLC	P50570	598	TEQRNVYKDLRQIEL	Q7Z478	275	AAKLLDAKEQAATFK
O95671	65	AMETAKQKALEVANR	P50579	427	LDRLGESKYLMALKN	Q7Z478	401	SPNPSFEKVPVGRYW
O95671	76	VANRLYQKDLRAPDV	P50750	49	GQKVALKKVLMENEK	Q7Z4G4	109	LHSDSTYKIKIHTFN
O95678	159	QIKTLNNKFASFIDK	P50914	137	LQKAALLKASPKKAP	Q7Z4V5	487	SEIKFALKVDSPDVK
O95747	266	KYGKSFRKMISLCLQ	P50990	152	NLVCCSAKNLRDIDE	Q7Z4V5	524	TDVVATLKKIRRYKA
O95749	25	YLLQLPGKQVRTKLS	P50990	16	PGFAQMLKEGAKHFS	Q7Z4V5	63	KDLFPYDKCKDKYGK
O95758	257	TLRIDFSKLTSLNVK	P50990	20	QMLKEGAKHFSGLEE	Q7Z4W1	17	VLVTGAGKGIGRGTV
O95758	264	KLTSLNVKYNNDKSR	P50990	296	NVVVTGGKVADMALH	Q7Z5R6	375	TQHKMKYKAPTDYCF
O95782	177	LCLLRLYKASPDLVP	P50990	318	MLVRLNSKWDLRRLC	Q7Z6B7	459	LITKLQAKHDLLQRT
O95782	403	MCDRSNAKQIVSEML	P50990	326	WDLRRLCKTVGATAL	Q7Z6Z7	2219	IIRLFLKKGLVNDLA
O95782	810	TQLAVQTKRVAAQVD	P50990	367	VVVFKHEKEDGAIST	Q7Z6Z7	2248	NTVNAALKPLETLSR
O95786	861	SSFEKRAKIFCARQN	P50990	400	DDGVNTFKVLTRDKR	Q7Z6Z7	25	DCRALIDKLKVCNDE
O95786	909	QTLYSKWKDFHFEKI	P50990	466	KANEVISKLYAVHQE	Q7Z7A4	192	PDKYLSDKDFQCLIK
O95831	109	LGLTPEQKQKKAALS	P50990	528	VDQIIMAKPAGGPKP	Q86TI2	43	SIIHGSRKYSGLIVN
O95831	388	IKLKDGRKVETDHIV	P50990	7	*MALHVPKAPGFAQM	Q86TV6	72	GASPRGPKPQLTEVR
O95831	593	PIARKIIKDGEQHED	P50991	288	AYILNLVKQIKKTGC	Q86UE4	248	PVGSKKNKGDSHLNV
O95861	244	VFASPGCKKWDTCAP	P50991	292	NLVKQIKKTGCNVLL	Q86UP2	1268	QLNETLTKLRTEQNE
O95861	49	CATDLQTKADRLAQM	P50991	321	LHFLNKMKIMVIKDI	Q86UP2	265	DQVEGIQKSGTKKLK
O96019	379	TPPSMRLKLIANNTT	P50991	375	NGSGKLLKITGCASP	Q86UP2	385	DRIGTLEKEHNVFQN
P00338	126	FIIPNVVKYSPNCKL	P50991	395	IVVRGSNKLVIEEAE	Q86UP2	535	EVQSLHSKLTDTLVS
P00338	232	EQWKEVHKQVVESAY	P50995	248	SFKTAYGKDLIKDLK	Q86UP2	543	LTDTLVSKQQLEQRL
P00338	278	HPVSTMIKGLYGIKD	P50995	255	KDLIKDLKSELSGNF	Q86UP2	708	KILNDQNKALKSEVQ
P00338	318	EEEARLKKSADTLWG	P50995	315	RELNRAYKAEFKKTL	Q86UP2	835	EKTVQDLKQEIKALK
P00338	59	DVIEDKLKGEMMDLQ	P50995	320	AYKAEFKKTLEEAIR	Q86UP2	842	KQEIKALKEEIGNVQ
P00338	81	TPKIVSGKDYNVTAN	P51114	295	VPRNLVGKVIGKNGK	Q86UU1	731	LGHVEQLKVRVKELE
P00367	457	SYGRLTFKYERDSNY	P51149	31	LMNQYVNKKFSNQYK	Q86UU1	873	SERLARDKNASLQLL
P00367	480	SLERKFGKHGGTIPI	P51153	3	*****MAKAYDHLFK	Q86UY8	260	SIRDVHIKGIMYRAI
P00367	503	RISGASEKDIVHSGL	P51153	56	TVDIEGKKIKLQVWD	Q86UY8	355	KGVLLWDKIHKLQKG
P00367	527	QIMRTAMKYNLGLDL	P51153	58	DIEGKKIKLQVWDTA	Q86V21	634	PYTLNGKKVEVAVKQ
P00387	164	FAIRPDKKSNPIIRT	P51398	175	LLQSSYNKQRFDQPL	Q86V48	150	EERNLTKKISSELEM
P00387	42	TLESPDIKYPLRLID	P51398	203	ERFLNQIKVQEKYVW	Q86V48	541	SSETVFGKRGHVLGN
P00390	456	PMYHAVTKRKTKCVM	P51398	207	NQIKVQEKYVWNKRE	Q86V48	757	LRSRAIIKPVIVDKD
P00441	123	RTLVVHEKADDLGKG	P51398	218	NKRESTEKGSPLGEV	Q86VP6	574	DLFTCTIKRLKAADI
P00491	265	EEVLAAGKQAAQKLE	P51572	185	EEENRSLKADLQKLK	Q86VP6	577	TCTIKRLKAADIDQE
P00505	122	GENSEVLKSGRFVTV	P51572	192	KADLQKLKDELASTK	Q86W11	315	KAFCQSSKLIRHQRI
P00505	159	SRDVFLPKPTWGNHT	P51572	204	STKQKLEKAENQVLA	Q86W92	286	EVKRLQEKLVCKMKG
P00505	227	DPRPEQWKEIATVVK	P51608	449	TAATAAEKYKHRGEG	Q86WA6	126	KDAVDLMKALKFKKV
P00505	296	GAFTMVCKDADEAKR	P51617	397	YLPEEYIKTGRLAVD	Q86WA6	257	FHADFIHKHVKGSRL
P00505	302	CKDADEAKRVESQLK	P51649	126	ERSSLLRKWYNLMIQ	Q86WA6	271	LHLMPEGKHNLHLRF
P00505	309	KRVESQLKILIRPMY	P51659	424	LPRAGKLKCEAVVAD	Q86WR0	125	KIVTVEKKVNEILNR
P00505	338	LNTPDLRKQWLQEVK	P51659	46	NDLGGDFKGVGKGSL	Q86X27	548	SEKGNSYKFQAGNRM
P00505	404	EFSIYMTKDGRISVA	P51659	565	AIKARFAKPVYPGQT	Q86X83	42	LRRGANPKIYEGAAR
P00505	59	KRDTNSKKMNLGVGA	P51659	57	KGSLAADKVVEEIRR	Q86XL3	105	TRFIFEKKLAQALLE
P00505	73	AYRDDNGKPYVLPSV	P51659	636	EEIGRRLKDIGPEVV	Q86XP3	270	QLMHQIRKSEYTQPT
P00505	82	YVLPSVRKAEAQIAA	P51659	644	DIGPEVVKKVNAVFE	Q86Y79	133	PLGRLALKLGGSARG
P00505	90	AEAQIAAKNLDKEYL	P51659	68	EIRRRGGKAVANYDS	Q86YH6	356	RERIKAGKGVTSAID
P00533	852	VKTPQHVKITDFGLA	P51659	707	LGKLDPQKAFFSGRL	Q86YR5	117	GNLGNTLKVLGRFDE
P00558	131	FHVEEEGKGKDASGN	P51659	731	QKLQMILKDYAKL**	Q86YR5	274	VAAEYYKKTLQLSRQ
P00558	141	DASGNKVKAEPAKIE	P51665	204	GLKGLNSKLLDIRSY	Q86YV9	225	IWSPGKGKVMVAAPR
P00558	15	TLDKLDVKGKRVVMR	P51790	750	AESPRPLKLRSILDM	Q8IUD2	569	LKDMLDVKERKVNVL
P00558	156	AFRASLSKLGDVYVN	P51809	42	KIPSENNKLTYSHGN	Q8IUD2	572	MLDVKERKVNVLQKK
P00558	192	AGGFLMKKELNYFAK	P51825	1067	MAMFRCKKDIAIKYS	Q8IUR0	9	EARFTRGKSALLERA
P00558	220	GGAKVADKIQLINNM	P51825	1072	CKKDIAIKYSRTLNK	Q8IV48	249	QCQLSRLKYPPFAKK
P00558	30	VDFNVPMKNNQITNN	P51948	80	EIRKKVLKIYNKREE	Q8IVF2	1004	KFKMPKFKMPSFGVS
P00558	353	EAFARGTKALMDEVV	P51991	134	KIFVGGIKEDTEEYN	Q8IVF2	1104	KGPQVDVKGPKLDLK
P00558	361	ALMDEVVKATSRGCI	P51991	148	NLRDYFEKYGKIETI	Q8IVF2	1334	KFKMPKFKMPSFGVS
P00558	41	ITNNQRIKAAVPSIK	P51991	151	DYFEKYGKIETIEVM	Q8IVF2	1434	KGPEIDIKGPKLDLK
P00558	75	DGVPMPDKYSLEPVA	P51991	187	VDKIVVQKYHTINGH	Q8IVF2	1499	KFKMPKFKMPSFGVS
P00568	21	VGGPGSGKGTQCEKI	P52209	38	AFNRTVSKVDDFLAN	Q8IVF2	1664	KFKMPKFKMPSFGVS
P02511	92	SPEELKVKVLGDVIE	P52209	48	DFLANEAKGTKVVGA	Q8IVF2	1814	GDLSLADKDVTAKDS
P02545	108	RLQLELSKVREEFKE	P52209	59	VVGAQSLKEMVSKLK	Q8IVF2	1829	KFKMPKFKMPSFGVS
P02545	114	SKVREEFKELKARNT	P52272	134	KAAEVLNKHSLSGRP	Q8IVF2	2159	KFKMPKFKMPSFGVS
P02545	117	REEFKELKARNTKKE	P52272	239	RADILEDKDGKSRGI	Q8IVF2	2259	KGPEIDIKGPKLDLK
P02545	122	ELKARNTKKEGDLIA	P52272	388	KRGEIIAKQGGGGGG	Q8IVF2	2489	RFKIPKFKMPSFGVS
P02545	123	LKARNTKKEGDLIAA	P52272	651	HAPGVARKACQIFVR	Q8IVF2	2589	KGPQLDVKGPKLDLK
P02545	135	IAAQARLKDLEALLN	P52272	672	TWKMLKDKFNECGHV	Q8IVF2	2639	GDLSLADKGVTAKDS
P02545	155	LSTALSEKRTLEGEL	P52272	698	SKGCGVVKFESPEVA	Q8IVF2	2819	KFKMPKFKMPSFGVS
P02545	171	DLRGQVAKLEAALGE	P52306	314	QKLFEGGKGSVFQRV	Q8IVF2	2969	GDLSLADKDVTAKDS
P02545	180	EAALGEAKKQLQDEM	P52565	127	REIVSGMKYIQHTYR	Q8IVF2	2984	KFKMPKFKMPSFGVS
P02545	181	AALGEAKKQLQDEML	P52565	138	HTYRKGVKIDKTDYM	Q8IVF2	3134	GDLSLADKDVTAKDS
P02545	201	ENRLQTMKEELDFQK	P52565	141	RKGVKIDKTDYMVGS	Q8IVF2	3149	KFKMPKFKMPSFGVS
P02545	208	KEELDFQKNIYSEEL	P52565	178	ARGSYSIKSRFTDDD	Q8IVF2	3299	GDLSLADKDVTAKDS
P02545	233	LVEIDNGKQREFESR	P52565	43	QEIQELDKDDESLRK	Q8IVF2	3629	GDLSLADKDVTAKDS
P02545	261	DQVEQYKKELEKTYS	P52565	99	GDLESFKKQSFVLKE	Q8IVF2	3794	GDLSLADKDVTAKDS
P02545	265	QYKKELEKTYSAKLD	P52597	87	HRYIEVFKSHRTEMD	Q8IVF2	3809	KFKMPKFKMPSFGVS
P02545	270	LEKTYSAKLDNARQS	P52597	98	TEMDWVLKHSGPNSA	Q8IVF2	3909	KGPEIDIKGPKLDLK
P02545	316	LQKQLAAKEAKLRDL	P52758	117	YQVAALPKGSRIEIE	Q8IVF2	3974	KFKMPKFKMPSFGVS
P02545	341	SRRLLAEKEREMAEM	P52815	150	VKLIKEIKNYIQGIN	Q8IVF2	4124	GDLSLADKDVTAKDS
P02545	378	MEIHAYRKLLEGEEE	P52815	162	GINLVQAKKLVESLP	Q8IVF2	4139	KFKMPKFKMPSFGVS
P02545	450	EEVDEEGKFVRLRNK	P52815	163	INLVQAKKLVESLPQ	Q8IVF2	4239	KGPQVDVKGPKLDLK
P02545	457	KFVRLRNKSNEDQSM	P52907	19	EKVRIAAKFITHAPP	Q8IVF2	4304	KFKMPKFKMPSFGVS
P02545	470	SMGNWQIKRQNGDDP	P52948	551	LTTPTHYKLTPRPAT	Q8IVF2	4454	GDLSLADKDVTAKDS
P02545	486	LTYRFPPKFTLKAGQ	P53004	248	VPNVGVNKNIFLKDQ	Q8IVF2	4569	KGPQVDVKGPKLDLK
P02545	597	TCGQPADKASASGSG	P53007	178	IVREQGLKGTYQGLT	Q8IVF2	839	KFKMPKFKMPSFGVS
P02545	78	SREVSGIKAAYEAEL	P53007	190	GLTATVLKQGSNQAI	Q8IVF2	989	GDLSLADKDVTAKDS
P02545	97	KTLDSVAKERARLQL	P53007	255	MQGLEAHKYRNTWDC	Q8IVH4	116	ESTHSRKKELAQVLL
P02751	100	AEETCFDKYTGNTYR	P53007	268	DCGLQILKKEGLKAF	Q8IVH4	321	RKRSQVWKPKVIRIS
P02751	1936	RITGYIIKYEKPGSP	P53007	277	EGLKAFYKGTVPRLG	Q8IVS2	359	RQLGAILKSCNMQAW
P02751	1981	IALKNNQKSEPLIGR	P53041	42	ANDYFKAKDYENAIK	Q8IWA0	226	ASGHMDGKIRLWRNF
P02787	122	YAVAVVKKDSGFQMN	P53041	97	ELDKKYIKGYYRRAA	Q8IWA0	466	PTLVTASKDGYFKVW
P02787	310	LFSSPHGKDLLFKDS	P53396	1077	IGHYLDQKRLKQGLY	Q8IWA0	628	QKGISREKVQWGVFV
P02787	37	VSEHEATKCQSFRDH	P53396	1080	YLDQKRLKQGLYRHP	Q8IWJ2	1222	EEKNTKIKQLLVKTK
P02787	373	LSHHERLKCDEWSVN	P53396	151	DVDAKAQKLLVGVDE	Q8IWJ2	36	DLIKFAKKQMMLIQK
P02787	553	KGDVAFVKHQTVPQN	P53396	230	ATADYICKVKWGDIE	Q8IWJ2	971	EEKINKIKLVAVKAK
P02787	659	DDTVCLAKLHDRNTY	P53396	369	RDYQGPLKEHEVTIF	Q8IWR0	709	GFLNMKIKFVCAQCL
P02787	683	KAVGNLRKCSTSSLL	P53396	471	VAPAKKAKPAMPQDS	Q8IXI1	509	AHCASVYKHHYMDGQ
P02792	106	AAMALEKKLNQALLD	P53396	488	SPRSLQGKSTTLFSR	Q8IXI2	512	EYCARIFKQHFMDSR
P03928	49	MKMKNYNKPWEPKWT	P53396	538	YPFTGDHKQKFYWGH	Q8IY17	131	PRMRKKLKMLNIAKK
P04035	502	RRQLLSKKLSEPSSL	P53396	630	PATVGGIKPGCFKIG	Q8IY17	137	LKMLNIAKKILRIQK
P04040	243	YKTDQGIKNLSVEDA	P53396	68	QLIKRRGKLGLVGVN	Q8IY17	144	KKILRIQKETPTLQR
P04075	108	KGGVVGIKVDKGVVP	P53396	836	RELGLIRKPASFMTS	Q8IY18	610	VIQETRLKQIYTAEE
P04075	111	VVGIKVDKGVVPLAG	P53396	968	NKMKKEGKLIMGIGH	Q8IYB3	36	KFAECLEKKVDMSKV
P04075	13	PALTPEQKKELSDIA	P53396	97	GQEATVGKATGFLKN	Q8IYB5	12	SCREKAQKLNEQHQL
P04075	14	ALTPEQKKELSDIAH	P53396	978	MGIGHRVKSINNPDM	Q8IYB8	99	EVKKVLDKFYKRKEI
P04075	147	KDGADFAKWRCVLKI	P53582	49	KGSWATHKLLHKKAK	Q8IYT2	74	KNSLNEVKNLLSDKK
P04075	312	ALQASALKAWGGKKE	P53597	57	LYVDKNTKIICQGFT	Q8IZH2	5	***MGVPKFYRWISE
P04075	322	GGKKENLKAAQEEYV	P53597	66	ICQGFTGKQGTFHSQ	Q8IZL8	354	RTLSVSSKNISLHGD
P04075	42	ESTGSIAKRLQSIGT	P53597	90	VGGTTPGKGGQTHLG	Q8IZP0	123	KNTSRTHKIIAPANM
P04075	99	RPFPQVIKSKGGVVG	P53602	207	LVVSAEKKLTGSTVG	Q8IZQ1	1353	LDSKAIAKQLGISSH
P04080	91	NYQTNKAKHDELTYF	P53618	575	YVALVQEKKKQNSFV	Q8N122	120	WQPRARYKQSLDPTV
P04083	166	ELKRDLAKDITSDTS	P53621	1028	KFEEAVEKFRSILLS	Q8N163	742	RLSAEQAKQLVSRVV
P04083	185	NALLSLAKGDRSEDF	P53621	1134	RLLELGPKPEVAQQT	Q8N1F7	370	LSPATENKLRLHYRR
P04083	29	VQTVKSSKGGPGSAV	P53621	1143	EVAQQTRKILSACEK	Q8N1G4	228	LADCPKLKEINFRGN
P04083	312	EIDMNDIKAFYQKMY	P53621	441	SLLIKNLKNEITKKV	Q8N1G4	569	LKVVYPSKADLATAP
P04083	90	AYLQETGKPLDETLK	P53621	447	LKNEITKKVQVPNCD	Q8N392	432	AVQNLPTKKQQLQAL
P04083	97	KPLDETLKKALTGHL	P53621	46	RMCTLIDKFDEHDGP	Q8N3C0	572	TGDMQLSKSEILRTQ
P04114	1121	TKEERKIKGVISIPR	P53621	574	PIYVTRVKGNNVYCL	Q8N3R3	81	KPGFKSLKPTQLTFY
P04114	2265	IRIQIQEKLQQLKRH	P53621	607	KLALINRKYDEVLHM	Q8N465	101	RTLRGCSKVLLRPRT
P04179	122	GELLEAIKRDFGSFD	P53621	993	NWKDAGLKNGVPAVG	Q8N4P3	25	KHRQQRRKDPEGTPY
P04179	130	RDFGSFDKFKEKLTA	P53667	489	ARLMVDEKTQPEGLR	Q8N4P3	93	VEEVTDDKTLPKLER
P04179	132	FGSFDKFKEKLTAAS	P53675	1347	WSRVNIPKVLRAAEQ	Q8N4P3	97	TDDKTLPKLERKRLQ
P04179	68	NLNVTEEKYQEALAK	P53675	450	GRKQLLEKWLKEDKL	Q8N4V1	122	LSSNTSLKLRKLESL
P04181	102	PKIVNALKSQVDKLT	P53675	453	QLLEKWLKEDKLECS	Q8N4V1	77	MDATSELKNKTFDTL
P04181	374	VVTAVRGKGLLNAIV	P53675	506	QKIVLYAKKVGYTPD	Q8N556	378	DNKLIFHKDRTDLKT
P04181	421	FAPPLVIKEDELRES	P53675	737	KYIQAACKTGQIKEV	Q8N5B7	121	QLDWNVRKIQCWFRH
P04181	49	DIFEREYKYGAHNYH	P53675	764	ERVKNFLKEAKLTDQ	Q8N5C6	547	MGVDPGYKHGCKLAI
P04181	66	PVALERGKGIYLWDV	P53680	45	VVTVRDAKHTNFVEF	Q8N5K1	74	KDSLINLKIQKENPK
P04406	107	GVFTTMEKAGAHLQG	P53990	134	KYSKEYGKLCRTNQI	Q8N684	397	RVLISSLKDCLHGIE
P04406	139	VMGVNHEKYDNSLKI	P53999	101	GEMKPGRKGISLNPE	Q8N6H7	24	LRAVPTNKACFDCGA
P04406	145	EKYDNSLKIISNASC	P53999	80	SVRDFKGKVLIDIRE	Q8N8S7	69	CAIPKGLKYNQATQT
P04406	194	TVDGPSGKLWRDGRG	P54136	205	FSSPNIAKEMHVGHL	Q8N999	91	KQAEKRFKNFLHSKE
P04406	215	PASTGAAKAVGKVIP	P54136	278	VFYKESKKRFDTEEE	Q8N9R8	103	DVYTKLWKFQQQHRQ
P04406	219	GAAKAVGKVIPELNG	P54136	377	SIPLTIVKSDGGYTY	Q8NBQ5	62	EFAKLKSKLVLWDIN
P04406	251	DLTCRLEKPAKYDDI	P54577	190	FGGIDQRKIFTFAEK	Q8NBQ5	70	LVLWDINKHGLEETA
P04406	263	DDIKKVVKQASEGPL	P54577	206	LPALGYSKRVHLMNP	Q8NBQ5	86	KCKGLGAKVHTFVVD
P04406	334	LMAHMASKE******	P54577	334	KFNTPALKKLASAAY	Q8NBS9	150	KPGQEAVKYQGPRDF
P04406	5	***MGKVKVGVNGFG	P54577	335	FNTPALKKLASAAYP	Q8NC51	122	QQLQGEGKIIDRRPE
P04424	97	TANERRLKELIGATA	P54577	356	PMAKGPAKNSEPEEV	Q8NC51	140	PRERRFEKPLEEKGE
P04632	179	KRWQAIYKQFDTDRS	P54577	427	VVVLCNLKPQKMRGV	Q8NC51	79	KESQKDRKNPLPPSV
P04792	112	APDELTVKTKDGVVE	P54577	474	VFVKGYEKGQPDEEL	Q8NC96	169	CIGNITNKKGGASKP
P04792	114	DELTVKTKDGVVEIT	P54577	482	GQPDEELKPKKKVFE	Q8NCA5	190	VPPNHVGKPLLKKPM
P04792	123	GVVEITGKHEERQDE	P54577	490	PKKKVFEKLQADFKI	Q8NCA5	249	SQTEKLAKVYQPKRS
P04792	198	LGGPEAAKSDETAAK	P54578	214	MMRVLQQKLEAIEDD	Q8NCE2	194	GDTHLFDKVRGYDIK
P04843	187	RNVESYTKLGNPTRS	P54578	300	RLQEEITKQSPTLQR	Q8NCW5	148	YYPKRPNKPLFTALV
P04843	516	ISTLNSGKKSLETEH	P54578	49	ARQKVMVKGGTLKDD	Q8ND76	169	DKHNPEQKQIYRFVR
P04843	524	KSLETEHKALTSEIA	P54578	62	DDDWGNIKIKNGMTL	Q8NDH3	274	GGLSIKGKTTMPGMK
P04843	538	ALLQSRLKTEGSDLC	P54619	264	NLDVSVTKALQHRSH	Q8NE71	347	KGKTTLLKHIANRAL
P04843	553	DRVSEMQKLDAQVKE	P54646	69	KREIQNLKLFRHPHI	Q8NE71	603	QEAPELLKRPKEYTV
P04843	559	QKLDAQVKELVLKSA	P54725	47	AFPVAGQKLIYAGKI	Q8NE86	332	AQAEMDLKRLRDPLQ
P04843	564	QVKELVLKSAVEAER	P54727	36	KIESEKGKDAFPVAG	Q8NEZ3	1233	IDAKYKKKIEGMVRR
P04843	576	AERLVAGKLKKDTYI	P54727	45	AFPVAGQKLIYAGKI	Q8NF91	3146	KAKGIQAKVTAAKED
P04843	587	DTYIENEKLISGKRQ	P54727	51	QKLIYAGKILNDDTA	Q8NF91	5439	RQIQKLAKDLTTILT
P04908	96	RNDEELNKLLGRVTI	P54727	6	**MQVTLKTLQQQTF	Q8NF91	5643	KFEAELKKLQAALEQ
P05023	487	IPFNSTNKYQLSIHK	P54819	14	AAEPEYPKGIRAVLL	Q8NF91	8061	TQLELINKQYRRLAR
P05089	33	EGPTVLRKAGLLEKL	P54819	28	LGPPGAGKGTQAPRL	Q8NF91	8079	TDSACSLKQMVHEGN
P05091	378	LGYINTGKQEGAKLL	P54819	62	ASGSELGKKLKATMD	Q8NF91	8647	NRLKLLLKEVSRHIK
P05091	428	VMQILKFKTIEEVVG	P54886	124	SGAVAFGKQRLRHEI	Q8NFJ9	317	SLHGFTHKGKKLWTV
P05120	102	LQAQAADKIHSSFRS	P54886	311	GMGGMEAKVKAALWA	Q8NFX7	147	EFINCQSKIMGGNSI
P05120	133	VNKLFGEKSASFREE	P54886	347	ITDIVEGKKVGTFFS	Q8NHP6	363	TKNIVAFKVRTTAPE
P05120	168	CAEEARKKINSWVKT	P54886	348	TDIVEGKKVGTFFSE	Q8NHS2	414	MCLPKEKKTLIGIKL
P05120	174	KKINSWVKTQTKGKI	P54886	409	EILLANKKDLEEAEG	Q8NHV1	248	KSEEEKEKEIKLLKL
P05141	105	IFLGGVDKRTQFWLY	P54886	424	RLAAPLLKRLSLSTS	Q8NHV4	271	AIGSSRGKIYQYDLR
P05141	147	RLAADVGKAGAEREF	P54886	572	RDIQKAAKGIPVMGH	Q8TAM2	184	LSRLNLTKYSQKPKL
P05141	163	GLGDCLVKIYKSDGI	P54886	767	TKWLLRGKDHVVSDF	Q8TAQ2	37	WLGKNYKKYIQAEPP
P05141	23	GVAAAISKTAVAPIE	P54920	163	ESNSSANKCLLKVAG	Q8TAQ2	457	FNGKNKSKTPEIYLA
P05141	272	EGGKAFFKGAWSNVL	P54920	94	DAGNAFKKADPQEAI	Q8TAT6	31	ETAATFLKKVAKEFG
P05141	33	VAPIERVKLLLQVQH	P55010	114	TDLHVNPKKQTIGNS	Q8TAT6	62	EITASSNKSLNLLKI
P05141	92	QALNFAFKDKYKQIF	P55010	143	KLCTFILKNPPENSD	Q8TAT6	68	NKSLNLLKIKHGDLL
P05141	96	FAFKDKYKQIFLGGV	P55010	24	KMPRLIAKVEGKGNG	Q8TB22	537	NYATNGAKFLKRHMF
P05198	106	EDKFTKSKTVYSILR	P55010	369	YVSKELAKEIRVKAE	Q8TB61	219	QVLAKASKVIPVMLM
P05198	61	RRIRSINKLIRIGRN	P55010	374	LAKEIRVKAEPFIKW	Q8TBA6	444	RILQSKEKLINSLKE
P05388	77	ENNPALEKLLPHIRG	P55010	55	RPPTYPTKYFGCELG	Q8TBC4	409	ITATLEGKNRTLYLQ
P05455	105	PEVTDEYKNDVKNRS	P55010	95	MLDGFIKKFVLCPEC	Q8TCG1	40	LEVISGQKLTRLFTS
P05556	794	VTTVVNPKYEGK***	P55011	1061	IRVFIGGKINRIDHD	Q8TCS8	285	TPSPEIVKYTHKLAM
P05783	187	NDIHGLRKVIDDTNI	P55036	122	SPVEDNEKDLVKLAK	Q8TCS8	306	FTDYEHDKVSRDEAV
P06241	427	YTARQGAKFPIKWTA	P55036	126	DNEKDLVKLAKRLKK	Q8TCS8	521	VTKTDPEKGEIEDYR
P06396	368	TASDFITKMDYPKQT	P55072	148	EAYRPIRKGDIFLVR	Q8TCS8	552	FKIAGTNKGITALQA
P06396	548	GKPMIIYKGGTSREG	P55072	658	KSRVAILKANLRKSP	Q8TCS8	583	QQASVAKKEILQIMN
P06396	584	RAVEVLPKAGALNSN	P55072	668	LRKSPVAKDVDLEFL	Q8TCT9	61	SVRCARGKNASDMPE
P06576	124	EGLVRGQKVLDSGAP	P55072	754	VSDNDIRKYEMFAQT	Q8TD19	318	RRREMEEKVTLLNAP
P06576	133	LDSGAPIKIPVGPET	P55084	181	RHSRKMRKLMLDLNK	Q8TD30	415	SVLGNLAKKAKLTED
P06576	259	ESGVINLKDATSKVA	P55084	188	KLMLDLNKAKSMGQR	Q8TD30	505	LPPVEKLKTVLQKVK
P06576	264	NLKDATSKVALVYGQ	P55084	190	MLDLNKAKSMGQRLS	Q8TDB6	25	SGPRVRRKLESYFQS
P06576	485	MGKLVPLKETIKGFQ	P55084	201	QRLSLISKFRFNFLA	Q8TDD1	184	ELALQTLKFTKELGK
P06703	40	ELKELIQKELTIGSK	P55084	272	VPFKVPGKDTVTKDN	Q8TDW0	550	SLKILSIKSNVSKIP
P06703	47	KELTIGSKLQDAEIA	P55084	277	PGKDTVTKDNGIRPS	Q8TDW0	555	SIKSNVSKIPQAVVD
P06730	119	RWLITLNKQQRRSDL	P55084	293	LEQMAKLKPAFIKPY	Q8TDW0	586	LVMLNNLKKMTNLTE
P06730	159	AVVNVRAKGDKIAIW	P55084	332	KALAMGYKPKAYLRD	Q8TDZ2	115	ARVVLVEKRTKFSRH
P06730	206	SHADTATKSGSTTKN	P55084	334	LAMGYKPKAYLRDFM	Q8TEA8	61	VFEDESGKHWSKSVM
P06733	126	CKAGAVEKGVPLYRH	P55084	447	AAANRLRKEGGQYGL	Q8TEQ0	96	YVKEVLNKHELQRFY
P06733	193	AEVYHNLKNVIKEKY	P55084	48	KTKKTLAKPNIRNVV	Q8TEQ6	1363	FKELFSEKHASLQNS
P06733	202	VIKEKYGKDATNVGD	P55084	72	LLSGTSYKDLMPHDL	Q8TEQ6	428	FWQGVKSKVTALCWH
P06733	233	LLKTAIGKAGYTDKV	P55265	757	SGPPHEPKFVYQAKV	Q8WUM4	11	FISVQLKKTSEVDLA
P06733	256	SEFFRSGKYDLDFKS	P55265	902	KGDSLSLKGETVNDC	Q8WUM4	19	TSEVDLAKPLVKFIQ
P06733	420	IEEELGSKAKFAGRN	P55265	944	DSIFEPAKGGEKLQI	Q8WUM4	209	KATRDKMKDAIIAKL
P06733	5	***MSILKIHAREIF	P55769	20	LADAHLTKKLLDLVQ	Q8WUM4	285	QHAAELIKTVASRYD
P06733	71	KAVEHINKTIAPALV	P55769	21	ADAHLTKKLLDLVQQ	Q8WUM4	303	NVKDFSDKINRALAA
P06733	80	IAPALVSKKLNVTEQ	P55786	712	LRGLVLGKLGKAGHK	Q8WUM4	313	RALAAAKKDNDFIYH
P06733	81	APALVSKKLNVTEQE	P55786	821	GGVAGGSKHGRKAAW	Q8WUM4	339	IGKATLVKSTPVNVP
P06737	29	VENVAELKKSFNRHL	P55786	829	HGRKAAWKFIKDNWE	Q8WUM4	48	RAAEELSKLRRAAVG
P06737	421	RIVALFPKDVDRLRR	P55786	832	KAAWKFIKDNWEELY	Q8WUM4	486	TPSNELYKPLRAEGT
P06744	12	TRDPQFQKLQQWYRE	P55809	176	GSPIKYNKDGSVAIA	Q8WV74	61	SRLTGRHKGDVSFPG
P06744	252	ALSTNTTKVKEFGID	P55809	418	ANWMIPGKMVKGMGG	Q8WVM0	46	LDLRLTDKIVRKAGN
P06744	454	KELQAAGKSPEDLER	P55809	421	MIPGKMVKGMGGAMD	Q8WVM0	50	LTDKIVRKAGNLTNA
P06748	141	KLLSISGKRSAPGGG	P55809	446	VTMEHSAKGNAHKIM	Q8WVM8	315	RPKRKNKKSYDLTPV
P06748	239	EKTPKTPKGPSSVED	P55809	455	NAHKIMEKCTLPLTG	Q8WVM8	541	GVKNLVLKQQNLPVT
P06748	257	KMQASIEKGGSLPKV	P55809	463	CTLPLTGKQCVNRII	Q8WVV9	396	VTHLNNVKLFGKRLN
P06748	273	AKFINYVKNCFRMTD	P55809	473	VNRIITEKAVFDVDK	Q8WVY7	117	NREENLLKISRRVKE
P06748	32	ADKDYHFKVDNDENE	P55809	481	AVFDVDKKKGLTLIE	Q8WW12	64	EAADLPTKPTKISKF
P06753	13	KKKMQMLKLDKENAL	P55854	32	DGSVVQFKIKRHTPL	Q8WWI1	1191	ASESISLKNLKRRSQ
P06753	137	VIENRALKDEEKMEL	P55854	41	KRHTPLSKLMKAYCE	Q8WWI1	1248	QDRLLQEKYQREQEK
P06753	150	ELQEIQLKEAKHIAE	P55854	44	TPLSKLMKAYCERQG	Q8WWI1	1337	VHEDQGKKPQDQLVI
P06753	16	MQMLKLDKENALDRA	P55884	209	KLKNVIHKIFSKFGK	Q8WWI1	1496	QRSASVNKEPVSLPG
P06753	218	QAEKYSQKEDKYEEE	P55884	213	VIHKIFSKFGKITND	Q8WWI1	179	TLYWLGRKAQSNPYY
P07108	17	AEEVRHLKTKPSDEE	P55884	216	KIFSKFGKITNDFYP	Q8WWM7	348	SLASREGKYIPLPQR
P07108	19	EVRHLKTKPSDEEML	P55884	228	FYPEEDGKTKGYIFL	Q8WWM7	529	ELARIAGKVPGLQNE
P07108	53	GMLDFTGKAKWDAWN	P55884	254	VKNADGYKLDKQHTF	Q8WWV3	246	DASELVRKLGADDVI
P07108	55	LDFTGKAKWDAWNEL	P55884	463	LLDKKSLKISGIKDF	Q8WWV3	53	WVIDKYGKNEVLRFT
P07195	7	*MATLKEKLIAPVAE	P55884	595	SVSFYHVKNNGKIEL	Q8WX93	1044	DGKQISPKSDHYTIQ
P07195	82	TPKIVADKDYSVTAN	P55884	718	LLSQEQIKQIKKDLK	Q8WXF1	206	GFVEFAAKPPARKAL
P07237	271	SVSDYDGKLSNFKTA	P56192	866	LKAQKADKNEVAAEV	Q8WXH0	2329	SVGQKIIKDDIKSLQ
P07355	115	QYDASELKASMKGLG	P56377	42	VQTVLARKPKMCSFL	Q8WXH0	572	SDVCMYRKNIYNVKS
P07355	119	SELKASMKGLGTDED	P56381	21	RYSQICAKAVRDALK	Q8WXI4	496	VILASRRKPCDNGDP
P07355	148	QEINRVYKEMYKTDL	P56545	279	RGGLVDEKALAQALK	Q8WYA6	534	KIVRHIIKEYAENIG
P07355	152	RVYKEMYKTDLEKDI	P56589	100	LKNRPSNKLEIWEDL	Q92466	309	RLLTTDQKSEIRVYS
P07355	157	MYKTDLEKDIISDTS	P57057	40	ASFHLSRKPISIVKG	Q92499	172	FGFGGTGKKSHNKQF
P07355	169	DTSGDFRKLMVALAK	P57060	204	IYNKCKRKNILEWAK	Q92499	234	LFPACVLKNAELKFN
P07355	176	KLMVALAKGRRAEDG	P57105	48	GIYVSRIKENGAAAL	Q92499	281	NAQVTQTKFLPNAPK
P07355	204	DLYDAGVKRKGTDVP	P57721	55	IRLLMHGKEVGSIIG	Q92499	307	EQTLNNIKQFKKYID
P07355	227	RSVPHLQKVFDRYKS	P57721	63	EVGSIIGKKGETVKK	Q92499	317	KKYIDNPKLRELLII
P07355	233	QKVFDRYKSYSPYDM	P57772	549	KILTPALKKRARAGR	Q92499	358	DDLVSTGKLNLSQVR
P07355	279	DRLYDSMKGKGTRDK	P58546	66	ADINAPDKHHITPLL	Q92499	472	RTDDVHAKDNTRPGA
P07355	302	RSEVDMLKIRSEFKR	P59998	44	EVEVRSSKELLLQPV	Q92499	505	VRAIKEHKMDQAIIF
P07355	310	IRSEFKRKYGKSLYY	P60174	212	VWAIGTGKTATPQQA	Q92499	516	AIIFCRTKIDCDNLE
P07355	313	EFKRKYGKSLYYYIQ	P60174	231	EKLRGWLKSNVSDAV	Q92538	713	GTEQFNQKPKKGIQF
P07355	324	YYIQQDTKGDYQKAL	P60174	275	LVGGASLKPEFVDII	Q92538	715	EQFNQKPKKGIQFLQ
P07355	47	LNIETAIKTKGVDEV	P60174	43	SAMAPSRKFFVGGNW	Q92538	716	QFNQKPKKGIQFLQE
P07355	49	IETAIKTKGVDEVTI	P60228	265	TTAVITNKDVRKRRQ	Q92540	232	NLQKALSKALESRDE
P07355	80	FAYQRRTKKELASAL	P60228	275	RKRRQVLKDLVKVIQ	Q92540	77	TTLQGQAKNRANPNR
P07355	81	AYQRRTKKELASALK	P60228	407	PYQQVIEKTKSLSFR	Q92552	265	RALQVMEKVAASPED
P07384	359	NLTPDALKSRTIRKW	P60228	409	QQVIEKTKSLSFRSQ	Q92572	149	DAQNKLEKSEAGLAG
P07384	583	KHKDLRTKGFSLESC	P60520	46	SQIVDIDKRKYLVPS	Q92598	471	VQNVSAQKDGEKSRV
P07437	58	YNEATGGKYVPRAIL	P60604	7	*MAGTALKRLMAEYK	Q92604	164	DQQLLLLKKHLENNY
P07602	414	GFCEVCKKLVGYLDR	P60660	26	FDRTGDGKILYSQCG	Q92616	12	TQVSETLKRFAGKVT
P07737	105	TFNVTVTKTDKTLVL	P60660	56	LKVLGNPKSDEMNVK	Q92616	1553	VLTDSHVKVQKAGQQ
P07737	108	VTVTKTDKTLVLLMG	P60660	81	LQTVAKNKDQGTYED	Q92616	2557	KLSSLFVKCLQNPSS
P07737	54	EVGVLVGKDRSSFYV	P60709	61	VGDEAQSKRGILTLK	Q92616	436	FKKAFSLKTSTSAVR
P07737	70	GLTLGGQKCSVIRDS	P60763	183	VLCPPPVKKPGKKCT	Q92616	48	DLPEGAVKGLCKLFC
P07737	91	FSMDLRTKSTGGAPT	P60842	146	NVRAEVQKLQMEAPH	Q92665	343	KHLESFPKQGPIRHF
P07741	114	KAELEIQKDALEPGQ	P60842	174	NRRYLSPKYIKMFVL	Q92688	101	NLSGNKLKDISTLEP
P07814	1109	AWVTRSGKTELAEPI	P60842	226	DVLEVTKKFMRDPIR	Q92688	99	HLNLSGNKLKDISTL
P07814	1375	EVGPRDMKSCQFVAV	P60842	237	DPIRILVKKEELTLE	Q92734	103	PLESSQVKYLRRELI
P07814	1389	VRRDTGEKLTVAENE	P60842	238	PIRILVKKEELTLEG	Q92747	174	RVFSAYIKEVDEKPA
P07814	139	AAWQEQLKQKKAPVH	P60842	291	KVDWLTEKMHARDFT	Q92747	179	YIKEVDEKPASTPWG
P07814	243	FDDTNPEKEKEDFEK	P60842	309	MHGDMDQKERDVIMR	Q92747	290	VSKLDIPKQSIQRNM
P07814	245	DTNPEKEKEDFEKVI	P60866	34	RNVKSLEKVCADLIR	Q92759	452	PAGHSDVKRFWKRQK
P07814	282	TIMKYAEKLIQEGKA	P60866	4	****MAFKDTGKTPV	Q92797	1040	KVWEGFIKCCQRTKP
P07814	300	DTPAEQMKAEREQRI	P60866	8	MAFKDTGKTPVEPEV	Q92797	912	QALPKLIKLNPIVVK
P07814	417	IEALGIRKPYIWEYS	P60891	176	SPDAGGAKRVTSIAD	Q92797	964	CDMKSIIKATNLCFA
P07814	435	LNNTVLSKRKLTWFV	P60900	104	EAANWKYKYGYEIPV	Q92805	347	AARSSQAKAINTLET
P07814	497	DKIWAFNKKVIDPVA	P60900	171	KATAAGVKQTESTSF	Q92841	313	IDFLESGKTNLRRCT
P07814	498	KIWAFNKKVIDPVAP	P60903	28	GDKGYLTKEDLRVLM	Q92878	1285	GRSEYVEKFYRIKKN
P07814	535	KEVAKHPKNPEVGLK	P60903	37	DLRVLMEKEFPGFLE	Q92878	264	EIEHNLSKIMKLDNE
P07814	599	AKLNLENKDYKKTTK	P60903	57	LAVDKIMKDLDQCRD	Q92878	461	QNELKNVKYELQQLE
P07814	642	LGKDEDFKQYVNKNS	P60981	127	SKDAIKKKFQGIKHE	Q92878	6	**MSRIEKMSILGVR
P07814	708	YIPDGHTKEMPTSGS	P60981	132	KKKFQGIKHECQANG	Q92878	713	RLAPDKLKSTESELK
P07814	788	VKQLLSLKAEYKEKT	P60981	19	CRIFYDMKVRKCSTP	Q92878	815	KIAQQAAKLQGIDLD
P07814	800	EKTGQEYKPGNPPAE	P60981	44	IFCLSADKKCIIVEE	Q92900	786	TEAANVEKITTKLLK
P07814	861	VECLLSLKAQYKEKT	P60981	78	FVGMLPEKDCRYALY	Q92900	790	NVEKITTKLLKAGAK
P07814	907	EAKVLFDKVASQGEV	P61011	432	TKFAQMVKKMGGIKG	Q92900	793	KITTKLLKAGAKPDQ
P07814	943	LQLKAQYKSLIGVEY	P61011	57	KQLRENVKSAIDLEE	Q92900	929	MQFSKPRKLVNTINP
P07900	112	NNLGTIAKSGTKAFM	P61019	53	RMITIDGKQIKLQIW	Q92945	251	KAGLVIGKGGETIKQ
P07900	292	IDQEELNKTKPIWTR	P61026	4	****MAKKTYDLLFK	Q92945	627	KAWEEYYKKIGQQPQ
P07900	362	RKKKNNIKLYVRRVF	P61081	36	AAQLRIQKDINELNL	Q92945	653	KAWEEYYKKQAQVAT
P07900	407	REMLQQSKILKVIRK	P61081	72	CPDEGFYKSGKFVFS	Q92945	71	GGGPGIRKDAFADAV
P07900	419	IRKNLVKKCLELFTE	P61086	14	QRIKREFKEVLKSEE	Q92947	240	IRGFLLEKGMRGLSA
P07900	443	KFYEQFSKNIKLGIH	P61086	18	REFKEVLKSEETSKN	Q93009	1084	LGLDHFNKAPKRSRY
P07900	458	EDSQNRKKLSELLRY	P61088	82	IYHPNVDKLGRICLD	Q93009	272	YELQHSDKPVGTKKL
P07900	489	TRMKENQKHIYYITG	P61106	193	AESGVQHKPSAPQGG	Q93009	327	IPKLFRGKMVSYIQC
P07900	567	KQEEKKTKFENLCKI	P61106	35	LHQFTEKKFMADCPH	Q93015	223	PSPRPPRKAPNLTAQ
P07900	573	TKFENLCKIMKDILE	P61158	240	YVCPDLVKEFNKYDT	Q93052	461	QPFYAVEKKAYCEPC
P07900	576	ENLCKIMKDILEKKV	P61158	244	DLVKEFNKYDTDGSK	Q93052	52	FAPVVAPKPKYNPYK
P07900	581	IMKDILEKKVEKVVV	P61158	251	KYDTDGSKWIKQYTG	Q93086	349	KREFYRDKKYEEVRG
P07900	632	MGYMAAKKHLEINPD	P61158	254	TDGSKWIKQYTGINA	Q969G3	146	YLAYINAKSRAEAAL
P07900	74	PSKLDSGKELHINLI	P61158	348	RTVDARLKLSEELSG	Q969G5	121	GLLVARGKLHVLLFK
P07900	84	HINLIPNKQDRTLTI	P61158	398	YQVCHTKKDYEEIGP	Q969Q4	31	GKTTLLYKLKGHQLV
P07910	189	SSKSGKLKGDDLQAI	P61160	118	EPPMNPTKNREKIVE	Q969R2	197	LKWTNYLKGYQRRWF
P07910	198	DDLQAIKKELTQIKQ	P61160	299	DTRSEFYKHIVLSGG	Q969S9	233	IGEAKTFKGVVDVVM
P07910	50	IVGCSVHKGFAFVQY	P61160	322	SRLERELKQLYLERV	Q969S9	334	VLCGSALKNKGIQPL
P07910	8	MASNVTNKTDPRSMN	P61160	7	*MDSQGRKVVVCDNG	Q969S9	336	CGSALKNKGIQPLLD
P07954	122	KIANAIMKAADEVAE	P61163	230	YLSINPQKDETLETE	Q969S9	451	GDTIVSSKSSALAAA
P07954	172	LGGELGSKIPVHPND	P61221	121	IGKSTALKILAGKQK	Q969U7	84	VYSLPSRKLVALQLR
P07954	223	DALDAKSKEFAQIIK	P61221	181	DQIPKAAKGTVGSIL	Q969X5	288	WKKIQLGKMH*****
P07954	263	KYAMTRIKAAMPRIY	P61221	191	VGSILDRKDETKTQA	Q969Z3	156	RIFGLDIKGRDCGNE
P07954	292	TRIGFAEKVAAKVAA	P61221	210	QLDLTHLKERNVEDL	Q96A26	62	YNRVPLHKPTDWQKK
P07954	61	YDTFGELKVPNDKYY	P61247	144	LFCVGFTKKRNNQIR	Q96A33	274	KALVRLQKEMQDLSE
P07954	66	ELKVPNDKYYGAQTV	P61247	27	KVVDPFSKKDWYDVK	Q96A33	286	LSEFCSDKPKSGAKY
P07954	80	VRSTMNFKIGGVTER	P61247	56	VTRTQGTKIASDGLK	Q96A33	288	EFCSDKPKSGAKYGL
P08133	102	YCDAKEIKDAISGIG	P61254	69	YKGQQIGKVVQVYRK	Q96A49	191	MRFALVPKLVKEEVF
P08133	265	ERLFKAMKGLGTRDN	P61353	128	RYKTGKNKWFFQKLR	Q96AB3	185	KEIQKLIKEPAPDSG
P08133	299	IFRTKYEKSLYSMIK	P61353	27	GRKAVIVKNIDDGTS	Q96AC1	393	KLTLKGYKQYWCTFK
P08133	306	KSLYSMIKNDTSGEY	P61353	93	SVDIPLDKTVVNKDV	Q96AC1	438	DVNISGQKFNIKLLI
P08133	354	AVARVELKGTVRPAN	P61353	98	LDKTVVNKDVFRDPA	Q96AE4	243	RITGDPYKVQQAKEM
P08133	370	FNPDADAKALRKAMK	P61604	40	LPEKSQGKVLQATVV	Q96AE4	312	AGVRIQFKPDDGTTP
P08133	377	KALRKAMKGLGTDED	P61604	54	VAVGSGSKGKGGEIQ	Q96AE4	394	KTGLIIGKGGETIKS
P08133	406	QQIRQTFKSHFGRDL	P61604	56	VGSGSKGKGGEIQPV	Q96AE4	400	GKGGETIKSISQQSG
P08133	418	RDLMTDLKSEISGDL	P61604	66	EIQPVSVKVGDKVLL	Q96AG4	111	FAQLKNLKWLDLKDN
P08133	442	PPAHYDAKQLKKAME	P61604	70	VSVKVGDKVLLPEYG	Q96AG4	135	AGDCLDEKQCKQCAN
P08133	579	YDVEHTIKKEMSGDV	P61619	395	KDVAKQLKEQQMVMR	Q96AG4	143	QCKQCANKVLQHMKA
P08133	620	KGAGTDEKTLTRIMV	P61764	382	GTDAEGEKIKDPMRA	Q96AG4	149	NKVLQHMKAVQADQE
P08133	63	QEVCQSYKSLYGKDL	P61764	497	IEDKLDTKHYPYIST	Q96AG4	207	RKEYDALKAAKREQE
P08133	647	EFIEKYDKSLHQAIE	P61964	245	LKLWDYSKGKCLKTY	Q96AG4	73	KLDLSKNKLQQLPAD
P08133	81	LKYELTGKFERLIVG	P61978	163	AGGIIGVKGAKIKEL	Q96B97	596	SLFGTEGKPKMEPAA
P08133	99	PPAYCDAKEIKDAIS	P61978	198	RVVLIGGKPDRVVEC	Q96BY6	1593	LLYFFMRKNFEFNKQ
P08237	372	KKFDEALKLRGRSFM	P61978	422	HESGASIKIDEPLEG	Q96BY6	834	KHGGSDIKWVDGGKP
P08237	476	TKRTLPKKSFEQISA	P61978	52	LRILLQSKNAGAVIG	Q96C36	47	PTVSALRKMGVNLTR
P08237	656	KGIFDSRKNVLGHMQ	P61981	10	DREQLVQKARLAEQA	Q96CB9	215	SRIARLQKILHSYVP
P08238	347	PFDLFENKKKKNNIK	P61981	142	AEVATGEKRATVVES	Q96CM8	182	LVFPKQFKTQQYYNV
P08238	411	IRKNIVKKCLELFSE	P61981	69	VISSIEQKTSADGNE	Q96CM8	340	SPIFNGKKALEAISR
P08238	435	KFYEAFSKNLKLGIH	P62081	74	PQLKSFQKIQVRLVR	Q96CM8	510	CKIVGRSKDMIIRGG
P08238	481	SRMKETQKSIYYITG	P62081	90	LEKKFSGKHVVFIAQ	Q96CM8	66	SYVQGCTKKHLNSKT
P08238	565	AKFENLCKLMKEILD	P62136	26	VQGSRPGKNVQLTEN	Q96CM8	72	TKKHLNSKTVGQCLE
P08238	568	ENLCKLMKEILDKKV	P62136	305	PADKNKGKYGQFSGL	Q96CN7	279	DKDHPKFKEIQNLIK
P08238	623	TMGYMMAKKHLEINP	P62140	146	CKRRFNIKLWKTFTD	Q96CN7	286	KEIQNLIKASAPESG
P08240	185	DGPLATSKPVPAEKS	P62140	25	VRGCRPGKIVQMTEA	Q96CS3	167	SQALNDAKRELRFLL
P08240	492	TMVQLFEKGYGKDAA	P62191	24	DDKDKKKKYEPPVPT	Q96CS3	367	ESVKIIFKLPNDSRV
P08240	629	DLRSLNAKAVVAALM	P62241	128	LGRKKGAKLTPEEEE	Q96CV9	213	STGTALSKYRSRSAD
P08559	244	AASTDYYKRGDFIPG	P62241	157	DERKKNAKISSLLEE	Q96CV9	333	MKKRLQEKCQALERK
P08559	313	EIQEVRSKSDPIMLL	P62249	4	****MPSKGPLQSVQ	Q96CV9	340	KCQALERKNSAIPSE
P08559	321	SDPIMLLKDRMVNSN	P62258	142	FATGNDRKEAAENSL	Q96CW1	238	DETSKSGKQSIAIDD
P08559	77	TVRRMELKADQLYKQ	P62263	63	VTGGMKVKADRDESS	Q96CW1	256	HQCVRLSKFDSERSI
P08579	219	ITPSHAMKITYAKK*	P62269	94	QKDVKDGKYSQVLAN	Q96CW1	281	LMRYRTTKDIILPFR
P08670	104	KNTRTNEKVELQELN	P62277	39	DVKEQIYKLAKKGLT	Q96CW1	312	VVIKSNFKPSLLAQK
P08670	120	RFANYIDKVRFLEQQ	P62277	43	QIYKLAKKGLTPSQI	Q96CW1	319	KPSLLAQKIEVRIPT
P08670	139	LAELEQLKGQGKSRL	P62318	84	LKNAPMLKSMKNKNQ	Q96CW1	345	MKGKAKYKASENAIV
P08670	143	EQLKGQGKSRLGDLY	P62333	206	VSSSIVDKYIGESAR	Q96CW1	405	GLKVRYLKVFEPKLN
P08670	168	VDQLTNDKARVEVER	P62333	72	TEEKFIVKATNGPRY	Q96DA6	107	AAKINEAKDLLEGQA
P08670	188	DIMRLREKLQEEMLQ	P62424	11	GKKAKGKKVAPAPAV	Q96DA6	75	GVSPTANKGKIRDAH
P08670	223	ARLDLERKVESLQEE	P62424	131	GKGDVPTKRPPVLRA	Q96DA6	93	MLLNHPDKGGSPYIA
P08670	235	QEEIAFLKKLHEEEI	P62424	150	VTTLVENKKAQLVVI	Q96DI7	8	MIEQQKRKGPELPLV
P08670	282	QYESVAAKNLQEAEE	P62424	176	FLPALCRKMGVPYCI	Q96E11	100	KSVIEALKDNFNKTL
P08670	292	QEAEEWYKSKFADLS	P62424	212	TQVNSEDKGALAKLV	Q96E11	105	ALKDNFNKTLNIRTS
P08670	294	AEEWYKSKFADLSEA	P62424	97	QTATQLLKLAHKYRP	Q96EK6	167	QNVGFYKKFGYTVSE
P08670	334	TCEVDALKGTNESLE	P62491	58	RSIQVDGKTIKAQIW	Q96EN8	629	NGVCLSQKQEPRLCL
P08670	373	QDEIQNMKEEMARHL	P62736	293	KCDIDIRKDLYANNV	Q96EP5	59	GFGFVKFKDPNCVGT
P08670	439	PLVDTHSKRTLLIKT	P62753	116	LNLVIVKKGEKDIPG	Q96EQ0	131	NRAAAQSKLGHYTDA
P08670	445	SKRTLLIKTVETRDG	P62753	211	EEAAEYAKLLAKRMK	Q96EY1	111	ASQKEIKKAYYQLAK
P08758	290	NIRKEFRKNFATSLY	P62805	80	YTEHAKRKTVTAMDV	Q96EY1	335	FITFRVQKSPVFRRD
P08758	301	TSLYSMIKGDTSGDY	P62820	58	RTIELDGKTIKLQIW	Q96EY7	126	FIINSYPKYFQKDIA
P08758	76	LKSELTGKFEKLIVA	P62820	61	ELDGKTIKLQIWDTA	Q96F86	346	LLCGPHVKGAQGISC
P08758	79	ELTGKFEKLIVALMK	P62826	127	CGNKVDIKDRKVKAK	Q96FJ2	9	SDRKAVIKNADMSED
P08758	86	KLIVALMKPSRLYDA	P62826	134	KDRKVKAKSIVFHRK	Q96FQ6	61	GNRKAADKLIQNLDA
P08758	97	LYDAYELKHALKGAG	P62826	141	KSIVFHRKKNLQYYD	Q96FV9	133	NTFYSAGKNYLLRMC
P08842	368	NGIYKGGKANNWEGG	P62826	142	SIVFHRKKNLQYYDI	Q96FZ7	24	DKAILQLKQQRDKLR
P08865	42	EQYIYKRKSDGIYII	P62826	38	LTGEFEKKYVATLGV	Q96G23	93	HFYLTSGKQPKQVEV
P08865	89	TGQRAVLKFAAATGA	P62826	60	HTNRGPIKFNVWDTA	Q96GG9	64	KGSLDRKKLEQLYNR
P09012	276	ITQNNAMKISFAKK*	P62826	99	VTSRVTYKNVPNWHR	Q96GY0	260	APGVLTNKRKTYTES
P09038	168	DPKRLYCKNGGFFLR	P62829	113	VNNKGEMKGSAITGP	Q96H79	195	CNKFHVCKSFVKGEC
P09038	194	EKSDPHIKLQLQAEE	P62841	7	*MAEVEQKKKRTFRK	Q96HC4	105	GEPKEVVKPVPITSP
P09038	219	ANRYLAMKEDGRLLA	P62851	52	NNLVLFDKATYDKLC	Q96HC4	34	PLTISSLKDGGKAAQ
P09110	237	VHDDKGTKRSITVTQ	P62851	57	FDKATYDKLCKEVPN	Q96HC4	71	LEAQNKIKGCTGSLN
P09110	266	KLKPAFKKDGSTTAG	P62851	60	ATYDKLCKEVPNYKL	Q96HS1	88	GEEELASKLDHYKAK
P09382	108	LPDGYEFKFPNRLNL	P62851	66	CKEVPNYKLITPAVV	Q96HY6	116	AETHLSGKIGAKKLR
P09382	128	MAADGDFKIKCVAFD	P62851	98	LLSKGLIKLVSKHRA	Q96I51	209	SYGQCGRKVVENEIY
P09382	29	GEVAPDAKSFVLNLG	P62854	66	FDAYVLPKLYVKLHY	Q96I59	116	ELKAEKIKVIGNCDA
P09382	64	NTIVCNSKDGGAWGT	P62857	16	IKLARVTKVLGRTGS	Q96I99	101	GVFNSGLKGGVHLTK
P09417	102	AKSKSLFKNCDLMWK	P62873	15	RQEAEQLKNQIRDAR	Q96I99	108	KGGVHLTKDPNVVGQ
P09429	114	SEYRPKIKGEHPGLS	P62873	23	NQIRDARKACADATL	Q96I99	218	LGFVGPLKSQAADQI
P09429	12	DPKKPRGKMSSYAFF	P62888	26	QLVMKSGKYVLGYKQ	Q96I99	271	DNAEFRQKDIFAMDD
P09429	127	LSIGDVAKKLGEMWN	P62888	44	MIRQGKAKLVILANN	Q96I99	338	LDLGGGVKEAQVYQA
P09429	128	SIGDVAKKLGEMWNN	P62888	9	VAAKKTKKSLESINS	Q96I99	47	LQEYQSKKLMSDNGV
P09429	146	DDKQPYEKKAAKLKE	P62899	70	RIDTRLNKAVWAKGI	Q96I99	73	NEALEAAKRLNAKEI
P09429	157	KLKEKYEKDIAAYRA	P62906	106	LVKKLAKKYDAFLAS	Q96I99	78	AAKRLNAKEIVLKAQ
P09429	30	CREEHKKKHPDASVN	P62906	130	ILGPGLNKAGKFPSL	Q96I99	93	ILAGGRGKGVFNSGL
P09429	59	MSAKEKGKFEDMAKA	P62906	91	HMDIEALKKLNKNKK	Q96IX5	17	YQFTGIKKYFNSYTL
P09486	140	EGTKKGHKLHLDYIG	P62913	38	DRLTRAAKVLEQLTG	Q96IZ0	333	QENKTLLKVVGQLTR
P09493	128	DESERGMKVIESRAQ	P62913	52	GQTPVFSKARYTVRS	Q96J02	858	PQKFCIEKVGKENWL
P09493	136	VIESRAQKDEEKMEI	P62913	85	KAEEILEKGLKVREY	Q96JH7	408	GDRSLQDKYLLRLVA
P09493	205	KTVTNNLKSLEAQAE	P62937	125	KTEWLDGKHVVFGKV	Q96JI7	1117	KVDPQLLKMALTPYP
P09493	37	KAAEDRSKQLEDELV	P62937	155	RNGKTSKKITIADCG	Q96K76	782	SVSSKTLKAEGFFRS
P09493	48	DELVSLQKKLKGTED	P62937	44	RALSTGEKGFGYKGS	Q96KC8	375	TTKAKQLKDSVTCSP
P09496	223	RLCDFNPKSSKQAKD	P62937	49	GEKGFGYKGSCFHRI	Q96KG9	249	ELVGANPKVRPNPAR
P09496	242	RSVLISLKQAPLVH*	P62937	76	RHNGTGGKSIYGEKF	Q96KP1	354	PSTLHDQKRYIRYLS
P09497	133	QEWREKAKKDLEEWN	P62942	48	RDRNKPFKFMLGKQE	Q96KP1	893	QLSSGADKKLLEELL
P09497	204	QLCDFNPKSSKQCKD	P62942	53	PFKFMLGKQEVIRGW	Q96KR1	756	SITERALKLVSDSLS
P09497	223	RSVLMSLKQTPLSR*	P62979	104	KVKLAVLKYYKVDEN	Q96KR1	786	GGKDRALKGVLRVGV
P09525	259	EKLYKSMKGLGTDDN	P62979	152	CLTYCFNKPEDK***	Q96LW7	46	YPQILTNKEAEKFRN
P09525	300	KSLYSFIKGDTSGDY	P62993	109	GNDVQHFKVLRDGAG	Q96MF7	107	LKLLVEKKFLALQSK
P09543	162	RLDCAQLKEKNQWQL	P63000	133	IEKLKEKKLTPITYP	Q96MU7	472	WNEHKPVKIGRDGQE
P09543	175	QLSADDLKKLKPGLE	P63010	11	SKYFTTNKKGEIFEL	Q96N21	340	SPGPVTNKATKILRH
P09543	178	ADDLKKLKPGLEKDF	P63010	117	MGCIRVDKITEYLCE	Q96N67	1962	GELHEQFKRKTILTT
P09543	204	KSSETLRKAGQVFLE	P63010	12	KYFTTNKKGEIFELK	Q96N67	1964	LHEQFKRKTILTTSH
P09543	79	DKYRDGTKMVSADAY	P63010	318	QKRPEILKQEIKVFF	Q96P48	1032	DDVSSALKRFLRDLP
P09601	18	QDLSEALKEATKEVH	P63010	36	KRKEAVKKVIAAMTV	Q96P48	752	SHSGFLYKTASAGKL
P09601	22	EALKEATKEVHTQAE	P63010	5	***MTDSKYFTTNKK	Q96P70	277	KAVTALVKNFPKHMV
P09601	243	LRQRASNKVQDSAPV	P63104	139	VAAGDDKKGIVDQSQ	Q96PE7	114	PIAGFLQKNKAGGMH
P09601	39	EFMRNFQKGQVTRDG	P63104	157	QEAFEISKKEMQPTH	Q96PE7	150	RSLSEEVKIGAHGKP
P09622	104	YYHMAHGKDFASRGI	P63104	3	*****MDKNELVQKA	Q96PK6	149	INVELSTKGQKKGPG
P09622	143	GGIAHLFKQNKVVHV	P63104	68	VVSSIEQKTEGAEKK	Q96Q11	328	NLGLFIVKNRKDLIK
P09622	166	KNQVTATKADGGTQV	P63104	9	DKNELVQKAKLAEQA	Q96Q15	173	LATVKQLKEFIQQPE
P09622	267	NFQRILQKQGFKFKL	P63167	36	LEKYNIEKDIAAHIK	Q96Q15	3232	ILTSMKKKLHTLSQI
P09622	410	GKSEEQLKEEGIEYK	P63167	9	CDRKAVIKNADMSEE	Q96Q42	533	TEVWTWGKGKEGQLG
P09622	420	GIEYKVGKFPFAANS	P63220	41	MNVAEVDKVTGRFNG	Q96QE5	156	RFLRKLLKPDIERER
P09622	66	KAAQLGFKTVCIEKN	P63241	39	VLKGRPCKIVEMSTS	Q96QK1	38	KRCLDKNKLMDALKH
P09651	166	VDKIVIQKYHTVNGH	P63241	68	IDIFTGKKYEDICPS	Q96QR8	60	NAKGRFLKIAEVGAG
P09651	3	*****MSKSESPKEP	P63241	85	NMDVPNIKRNDFQLI	Q96RF0	314	VPVHRRYKHFDWLYA
P09651	350	GGGQYFAKPRNQGGY	P63244	130	GSRDKTIKLWNTLGV	Q96RF0	338	SVPHLPEKQATGRFE
P09661	172	KRGAQLAKDIARRSK	P63244	183	VWNLANCKLKTNHIG	Q96RF0	432	ESKIDGFKCFTKKMD
P09661	221	LAEVERLKGLLQSGQ	P63279	18	QERKAWRKDHPFGFV	Q96RF0	437	GFKCFTKKMDDSALQ
P09874	196	TEDKEALKKQLPGVK	P67936	11	LNSLEAVKRKIQALQ	Q96RK4	285	MCFFGKKKYVAAISC
P09874	548	HSAHVLEKGGKVFSA	P67936	13	SLEAVKRKIQALQQQ	Q96RP9	340	DDSKEKTKILMNSSR
P09874	683	IFDVESMKKAMVEYE	P67936	169	KNVTNNLKSLEAASE	Q96RP9	468	NDLEKFSKGIGRFTR
P09913	294	IGCCYRAKVFQVMNL	P67936	181	ASEKYSEKEDKYEEE	Q96RQ3	237	SARREAKKSFNDDAM
P09914	259	YVFRYAAKFYRRKGS	P67936	195	EIKLLSDKLKEAETR	Q96RQ3	295	EAPAPGIKSEVRKKL
P09914	336	FESAVEKKPTFEVAH	P67936	215	RTVAKLEKTIDDLEE	Q96RQ3	367	LRIAAGEKIPLSQEE
P09936	131	MSPEDRAKCFEKNEA	P67936	223	TIDDLEEKLAQAKEE	Q96S99	44	LGEGVLTKECRKKAK
P09936	65	QHENFRKKQIEELKG	P67936	44	GERERREKAEGDVAA	Q96SI9	216	QARANGLKSCVIVLR
P09936	71	KKQIEELKGQEVSPK	P68036	131	DLAEEYSKDRKKFCK	Q96SZ5	55	PENLSKLKSLLTQLR
P09972	111	VVGIKVDKGVVPLAG	P68036	138	KDRKKFCKNAEEFTK	Q96T60	183	LITTRSGKVFPTGPS
P09972	42	ESVGSMAKRLSQIGV	P68036	73	PKITFKTKIYHPNID	Q96T60	226	QMSIGRGKLPAEEFK
P0C0S5	116	GVIPHIHKSLIGKKG	P68036	82	YHPNIDEKGQVCLPV	Q96T76	496	LYRLSFLKEDSQSCR
P0C0S8	96	RNDEELNKLLGKVTI	P68036	9	AASRRLMKELEEIRK	Q96TA1	330	IRAFILPKAEVCVRN
P0C7P0	48	VALKTPIKVELVAGK	P68104	172	KRYEEIVKEVSTYIK	Q96TA1	479	VLERVLKKYDYDSSS
P0CB38	107	VFIKNLDKSIDNKTL	P68104	179	KEVSTYIKKIGYNPD	Q96TA1	554	KDILQAVKEAAVQRK
P0CG47	109	VKAKIQDKEGIPPDQ	P68104	180	EVSTYIKKIGYNPDT	Q96TA1	83	FQHQEDSKKWRNRFS
P0CG47	11	FVKTLTGKTITLEVE	P68104	244	PPTRPTDKPLRLPLQ	Q99424	453	QVARFLVKSYLQTQM
P0CG47	124	QRLIFAGKQLEDGRT	P68104	255	LPLQDVYKIGGIGTV	Q99426	153	AQRLAEEKAQASSIP
P0CG47	139	LSDYNIQKESTLHLV	P68104	273	RVETGVLKPGMVVTF	Q99426	203	RYDEPLGKNDGSVNG
P0CG47	158	GGMQIFVKTLTGKTI	P68104	392	KKLEDGPKFLKSGDA	Q99436	237	RPYTVPNKKGTRLGR
P0CG47	163	FVKTLTGKTITLEVE	P68104	395	EDGPKFLKSGDAAIV	Q99442	35	LRFNCPTKSTNMMGH
P0CG47	185	VKAKIQDKEGIPPDQ	P68104	41	IDKRTIEKFEKEAAE	Q99460	310	TSSAFVGKTPEASPE
P0CG47	200	QRLIFAGKQLEDGRT	P68104	439	TVAVGVIKAVDKKAA	Q99471	47	QTKYVEAKDCLNVLN
P0CG47	215	LSDYNIQKESTLHLV	P68104	44	RTIEKFEKEAAEMGK	Q99497	32	VMRRAGIKVTVAGLA
P0CG47	33	VKAKIQDKEGIPPDQ	P68400	229	LASMIFRKEPFFHGH	Q99497	41	TVAGLAGKDPVQCSR
P0CG47	48	QRLIFAGKQLEDGRT	P68431	123	KRVTIMPKDIQLARR	Q99536	230	ASKHEALKENGVTHP
P0CG47	6	**MQIFVKTLTGKTI	P68431	57	REIRRYQKSTELLIR	Q99536	295	ANLLTGPKRNLMALA
P0CG47	63	LSDYNIQKESTLHLV	P68431	80	REIAQDFKTDLRFQS	Q99536	372	EKVADAMKQMQEKKN
P0CG47	82	GGMQIFVKTLTGKTI	P78344	187	RNVDVYDKRENPLLP	Q99567	592	EEIQRRVKLLCDQKK
P0CG47	87	FVKTLTGKTITLEVE	P78344	230	IHESILHKCIKTLLE	Q99570	773	AIAQLLKKLLSQGMT
P0DME0	142	VTEFEDIKSGYRIDF	P78347	526	YGIPRLEKIIQVGNR	Q99570	951	LQQLIQQKREQCNAE
P0DMV8	246	NHFVEEFKRKHKKDI	P78368	51	PNFRVGKKIGCGNFG	Q99590	1428	SGEVNSTKVANLVKA
P0DMV8	500	KSTGKANKITITNDK	P78371	154	DHGSDEVKFRQDLMN	Q99598	247	SKKLYTLKQSLAKVE
P0DMV8	524	RMVQEAEKYKAEDEV	P78406	258	AKDNFTFKCHRSNGT	Q99598	252	TLKQSLAKVENACYA
P0DMV8	56	RLIGDAAKNQVALNP	P78417	136	SFIRSQNKEDYAGLK	Q99598	68	RDITVESKRTIFLLH
P10155	170	ALALAVTKYKQRNGW	P78417	148	GLKEEFRKEFTKLEE	Q99613	136	KMNKNNAKALSTLRQ
P10155	287	ALLRNLGKMTANSVL	P78417	152	EFRKEFTKLEEVLTN	Q99613	627	AFRQGLTKDAHNALL
P10155	312	CEKLCNEKLLKKARI	P78417	57	EVININLKNKPEWFF	Q99613	643	IQSSGRAKELLGQGL
P10412	106	TGASGSFKLNKKAAS	P78417	59	ININLKNKPEWFFKK	Q99615	306	NRGTVNSKLRKLDDA
P10412	34	SAGAAKRKASGPPVS	P78524	1097	ELRKCRAKGLFEQRV	Q99615	32	KREAETFKEQGNAYY
P10412	46	PVSELITKAVAASKE	P78527	1057	EKSPVNTKSLFKRLY	Q99623	216	RAQFLVEKAKQEQRQ
P10412	63	GVSLAALKKALAAAG	P78527	1361	EGWKLLKKDLCNTHL	Q99623	262	RAAQNISKTIATSQN
P10412	64	VSLAALKKALAAAGY	P78527	1407	VNLMKALKMSPYKDI	Q99638	2	******MKCLVTGGN
P10412	75	AAGYDVEKNNSRIKL	P78527	1617	NQKHQGLKLATTILQ	Q99704	63	SSRRLDCKVIRLAEC
P10412	85	SRIKLGLKSLVSKGT	P78527	263	IRPQIDLKRYAVPSA	Q99714	105	SKTYNLKKGQTHTLE
P10412	90	GLKSLVSKGTLVQTK	P78527	2702	SVGPDFGKKRLGLPG	Q99714	52	SGGEAQAKKLGNNCV
P10412	97	KGTLVQTKGTGASGS	P78527	2715	PGDEVDNKVKGAAGR	Q99714	53	GGEAQAKKLGNNCVF
P10515	466	LVRKELNKILEGRSK	P78527	2738	RFMRDQEKLSLMYAR	Q99714	99	AGIAVASKTYNLKKG
P10515	473	KILEGRSKISVNDFI	P78527	2758	QKREKEIKSELKMKQ	Q99729	101	EVVDCTIKMDPNTGR
P10515	637	QWLAEFRKYLEKPIT	P78527	2764	IKSELKMKQDAQVVL	Q99729	82	GLSWDTSKKDLKDYF
P10586	1459	LEEKSRVKCDQYWPA	P78527	2908	LPAELPAKRVRGKAR	Q99747	123	MALERAGKLIENVDP
P10586	1748	LREMGREKCHQYWPA	P78527	3241	CKFSMKMKMIDSARK	Q99797	50	VGAAFNVKPQGSRLD
P10599	39	CGPCKMIKPFFHSLS	P78527	3248	KMIDSARKQNNFSLA	Q99797	87	AQEKALRKTELLVDR
P10599	94	GEFSGANKEKLEATI	P78527	3260	SLAMKLLKELHKESK	Q99798	520	YLTGTDGKKFRLEAP
P10606	56	REIMLAAKKGLDPYN	P78527	3355	LAEIEEDKARRILEL	Q99798	549	DTYQHPPKDSSGQHV
P10606	57	EIMLAAKKGLDPYNV	P78527	3455	EKMLKALKLNSNEAR	Q99798	591	ILIKVKGKCTTDHIS
P10606	68	PYNVLAPKGASGTRE	P78527	3552	TSTGHKNKEFVARIK	Q99798	605	SAAGPWLKFRGHLDN
P10620	42	AFYRLTRKVFANPED	P78527	357	RNVDSNNKELSIAIR	Q99798	730	KLTIQGLKDFTPGKP
P10620	55	EDCVAFGKGENAKKY	P78527	3608	VNKKNIEKMYERMYA	Q99798	736	LKDFTPGKPLKCIIK
P10620	60	FGKGENAKKYLRTDD	P78527	3631	GLGAFRRKFIQTFGK	Q99798	739	FTPGKPLKCIIKHPN
P10644	123	KVIPKDYKTMAALAK	P78527	3638	KFIQTFGKEFDKHFG	Q99832	157	EQRKLLEKCAMTALS
P10746	10	VLLLKDAKEDDCGQD	P78527	3650	HFGKGGSKLLRMKLS	Q99832	320	RVPEEDLKRTMMACG
P10768	186	VLCPWGKKAFSGYLG	P78527	3681	SKPPGNLKECSPWMS	Q99832	55	LIVDGRGKATISNDG
P10768	200	GTDQSKWKAYDATHL	P78527	828	AAQKGFNKVVLKHLK	Q99961	152	NLCEKDLKEIQHHLK
P10768	247	IAACTEKKIPVVFRL	P78527	838	LKHLKKTKNLSSNEA	Q99961	177	YKKKRQGKIPDEELR
[truncated: 771 more rows]

## Sheet: Methylation
Uniprot_id	PTM_site	PTM_domain	Uniprot_id	PTM_site	PTM_domain	Uniprot_id	PTM_site	PTM_domain
[truncated: 673 more rows]

[truncated: 3 more sheets: Succinylation, Sumoylation, Ubiquitination]
